# Supplementary material for: Genetic regulation of exosome biogenesis pathway in human adipose and muscle tissue and association with obesity and insulin resistance
Source: Research Square preprint supplement (doi:10.21203/rs.3.rs-6580546/v1), 2025-07-11
Supplement: Supplementary file 1 [file 2ab4d0d487eed99e290ee048.xlsx]

## Sheet: S.Table-1
Supplementary Table-1: Human Exosome pathway
A curated list of genes involved in biogenesis, assembly and secretion in the cellular component exosome
human_entrez_gene	human_ensembl_gene	hgnc_id	human_name	human_symbol
26	ENSG00000002726	HGNC:80	amine oxidase copper containing 1	AOC1
58	ENSG00000143632	HGNC:129	actin alpha 1, skeletal muscle	ACTA1
59	ENSG00000107796	HGNC:130	actin alpha 2, smooth muscle	ACTA2
60	ENSG00000075624	HGNC:132	actin beta	ACTB
70	ENSG00000159251	HGNC:143	actin alpha cardiac muscle 1	ACTC1
71	ENSG00000184009	HGNC:144	actin gamma 1	ACTG1
72	ENSG00000163017	HGNC:145	actin gamma 2, smooth muscle	ACTG2
95	ENSG00000243989	HGNC:177	aminoacylase 1	ACY1
213	ENSG00000163631	HGNC:399	albumin	ALB
226	ENSG00000149925	HGNC:414	aldolase, fructose-bisphosphate A	ALDOA
230	ENSG00000109107	HGNC:418	aldolase, fructose-bisphosphate C	ALDOC
290	ENSG00000166825	HGNC:500	alanyl aminopeptidase, membrane	ANPEP
301	ENSG00000135046	HGNC:533	annexin A1	ANXA1
302	ENSG00000182718	HGNC:537	annexin A2	ANXA2
304	ENSG00000231991	HGNC:539	annexin A2 pseudogene 2	ANXA2P2
348	ENSG00000130203	HGNC:613	apolipoprotein E	APOE
356	ENSG00000117560	HGNC:11936	Fas ligand	FASLG
358	ENSG00000240583	HGNC:633	aquaporin 1 (Colton blood group)	AQP1
359	ENSG00000167580	HGNC:634	aquaporin 2	AQP2
629	ENSG00000243649	HGNC:1037	complement factor B	CFB
635	ENSG00000145692	HGNC:1047	betaine--homocysteine S-methyltransferase	BHMT
688	ENSG00000102554	HGNC:6349	KLF transcription factor 5	KLF5
717	ENSG00000166278	HGNC:1248	complement C2	C2
733	ENSG00000176919	HGNC:1354	complement C8 gamma chain	C8G
762	ENSG00000167434	HGNC:1375	carbonic anhydrase 4	CA4
928	ENSG00000010278	HGNC:1709	CD9 molecule	CD9
933	ENSG00000012124	HGNC:1643	CD22 molecule	CD22
942	ENSG00000114013	HGNC:1705	CD86 molecule	CD86
947	ENSG00000174059	HGNC:1662	CD34 molecule	CD34
961	ENSG00000196776	HGNC:1682	CD47 molecule	CD47
967	ENSG00000135404	HGNC:1692	CD63 molecule	CD63
970	ENSG00000125726	HGNC:11937	CD70 molecule	CD70
975	ENSG00000110651	HGNC:1701	CD81 molecule	CD81
1192	ENSG00000213719	HGNC:2062	chloride intracellular channel 1	CLIC1
1213	ENSG00000141367	HGNC:2092	clathrin heavy chain	CLTC
1636	ENSG00000159640	HGNC:2707	angiotensin I converting enzyme	ACE
1663	ENSG00000013573	HGNC:2736	DEAD/H-box helicase 11	DDX11
1811	ENSG00000091138	HGNC:3018	solute carrier family 26 member 3	SLC26A3
1950	ENSG00000138798	HGNC:3229	epidermal growth factor	EGF
2335	ENSG00000115414	HGNC:3778	fibronectin 1	FN1
2938	ENSG00000243955	HGNC:4626	glutathione S-transferase alpha 1	GSTA1
2939	ENSG00000244067	HGNC:4627	glutathione S-transferase alpha 2	GSTA2
2940	ENSG00000174156	HGNC:4628	glutathione S-transferase alpha 3	GSTA3
3181	ENSG00000122566	HGNC:5033	heterogeneous nuclear ribonucleoprotein A2/B1	HNRNPA2B1
3303	ENSG00000204389	HGNC:5232	heat shock protein family A (Hsp70) member 1A	HSPA1A
3304	ENSG00000204388	HGNC:5233	heat shock protein family A (Hsp70) member 1B	HSPA1B
3305	ENSG00000204390	HGNC:5234	heat shock protein family A (Hsp70) member 1 like	HSPA1L
3306	ENSG00000126803	HGNC:5235	heat shock protein family A (Hsp70) member 2	HSPA2
3308	ENSG00000170606	HGNC:5237	heat shock protein family A (Hsp70) member 4	HSPA4
3309	ENSG00000044574	HGNC:5238	heat shock protein family A (Hsp70) member 5	HSPA5
3310	ENSG00000173110	HGNC:5239	heat shock protein family A (Hsp70) member 6	HSPA6
3312	ENSG00000109971	HGNC:5241	heat shock protein family A (Hsp70) member 8	HSPA8
3329	ENSG00000144381	HGNC:5261	heat shock protein family D (Hsp60) member 1	HSPD1
3383	ENSG00000090339	HGNC:5344	intercellular adhesion molecule 1	ICAM1
3385	ENSG00000076662	HGNC:5346	intercellular adhesion molecule 3	ICAM3
3416	ENSG00000119912	HGNC:5381	insulin degrading enzyme	IDE
3497	ENSG00000211891	HGNC:5522	immunoglobulin heavy constant epsilon	IGHE
3500	ENSG00000211896	HGNC:5525	immunoglobulin heavy constant gamma 1 (G1m marker)	IGHG1
3501	ENSG00000211893	HGNC:5526	immunoglobulin heavy constant gamma 2 (G2m marker)	IGHG2
3502	ENSG00000211897	HGNC:5527	immunoglobulin heavy constant gamma 3 (G3m marker)	IGHG3
3503	ENSG00000211892	HGNC:5528	immunoglobulin heavy constant gamma 4 (G4m marker)	IGHG4
3507	ENSG00000211899	HGNC:5541	immunoglobulin heavy constant mu	IGHM
3674	ENSG00000005961	HGNC:6138	integrin subunit alpha 2b	ITGA2B
3676	ENSG00000115232	HGNC:6140	integrin subunit alpha 4	ITGA4
3678	ENSG00000161638	HGNC:6141	integrin subunit alpha 5	ITGA5
3680	ENSG00000144668	HGNC:6145	integrin subunit alpha 9	ITGA9
3685	ENSG00000138448	HGNC:6150	integrin subunit alpha V	ITGAV
3860	ENSG00000171401	HGNC:6415	keratin 13	KRT13
3866	ENSG00000171346	HGNC:6421	keratin 15	KRT15
3920	ENSG00000005893	HGNC:6501	lysosomal associated membrane protein 2	LAMP2
4121	ENSG00000111885	HGNC:6821	mannosidase alpha class 1A member 1	MAN1A1
4151	ENSG00000198125	HGNC:6915	myoglobin	MB
4582	ENSG00000185499	HGNC:7508	mucin 1, cell surface associated	MUC1
4644	ENSG00000197535	HGNC:7602	myosin VA	MYO5A
4645	ENSG00000167306	HGNC:7603	myosin VB	MYO5B
4653	ENSG00000034971	HGNC:7610	myocilin	MYOC
4669	ENSG00000108784	HGNC:7632	N-acetyl-alpha-glucosaminidase	NAGLU
4904	ENSG00000065978	HGNC:8014	Y-box binding protein 1	YBX1
4924	ENSG00000104805	HGNC:8043	nucleobindin 1	NUCB1
4925	ENSG00000070081	HGNC:8044	nucleobindin 2	NUCB2
4931	ENSG00000143748	HGNC:8070	nuclear VCP like	NVL
5054	ENSG00000106366	HGNC:8583	serpin family E member 1	SERPINE1
5071	ENSG00000185345	HGNC:8607	parkin RBR E3 ubiquitin protein ligase	PRKN
5104	ENSG00000188488	HGNC:8723	serpin family A member 5	SERPINA5
5172	ENSG00000091137	HGNC:8818	solute carrier family 26 member 4	SLC26A4
5230	ENSG00000102144	HGNC:8896	phosphoglycerate kinase 1	PGK1
5232	ENSG00000170950	HGNC:8898	phosphoglycerate kinase 2	PGK2
5310	ENSG00000008710	HGNC:9008	polycystin 1, transient receptor potential channel interacting	PKD1
5311	ENSG00000118762	HGNC:9009	polycystin 2, transient receptor potential cation channel	PKD2
5314	ENSG00000170927	HGNC:9016	PKHD1 ciliary IPT domain containing fibrocystin/polyductin	PKHD1
5393	ENSG00000123737	HGNC:9137	exosome component 9	EXOSC9
5394	ENSG00000171824	HGNC:9138	exosome component 10	EXOSC10
5420	ENSG00000128567	HGNC:9171	podocalyxin like	PODXL
5464	ENSG00000180817	HGNC:9226	inorganic pyrophosphatase 1	PPA1
5549	ENSG00000188783	HGNC:9357	proline and arginine rich end leucine rich repeat protein	PRELP
5672	ENSG00000243137	HGNC:9521	pregnancy specific beta-1-glycoprotein 4	PSG4
5768	ENSG00000116260	HGNC:9756	quiescin sulfhydryl oxidase 1	QSOX1
5817	ENSG00000073008	HGNC:9705	PVR cell adhesion molecule	PVR
5819	ENSG00000130202	HGNC:9707	nectin cell adhesion molecule 2	NECTIN2
5867	ENSG00000168118	HGNC:9781	RAB4A, member RAS oncogene family	RAB4A
5869	ENSG00000111540	HGNC:9784	RAB5B, member RAS oncogene family	RAB5B
5873	ENSG00000069974	HGNC:9766	RAB27A, member RAS oncogene family	RAB27A
5874	ENSG00000041353	HGNC:9767	RAB27B, member RAS oncogene family	RAB27B
5911	ENSG00000125249	HGNC:9861	RAP2A, member of RAS oncogene family	RAP2A
5912	ENSG00000181467	HGNC:9862	RAP2B, member of RAS oncogene family	RAP2B
5940	ENSG00000234414	HGNC:9912	RNA binding motif protein Y-linked family 1 member A1	RBMY1A1
6317	ENSG00000057149	HGNC:10569	serpin family B member 3	SERPINB3
6318	ENSG00000206073	HGNC:10570	serpin family B member 4	SERPINB4
6337	ENSG00000111319	HGNC:10599	sodium channel epithelial 1 subunit alpha	SCNN1A
6338	ENSG00000168447	HGNC:10600	sodium channel epithelial 1 subunit beta	SCNN1B
6340	ENSG00000166828	HGNC:10602	sodium channel epithelial 1 subunit gamma	SCNN1G
6382	ENSG00000115884	HGNC:10658	syndecan 1	SDC1
6385	ENSG00000124145	HGNC:10661	syndecan 4	SDC4
6386	ENSG00000137575	HGNC:10662	syndecan binding protein	SDCBP
6406	ENSG00000124233	HGNC:10742	semenogelin 1	SEMG1
6407	ENSG00000124157	HGNC:10743	semenogelin 2	SEMG2
6490	ENSG00000185664	HGNC:10880	premelanosome protein	PMEL
6517	ENSG00000181856	HGNC:11009	solute carrier family 2 member 4	SLC2A4
6528	ENSG00000105641	HGNC:11040	solute carrier family 5 member 5	SLC5A5
6550	ENSG00000066230	HGNC:11073	solute carrier family 9 member A3	SLC9A3
6553	ENSG00000135740	HGNC:11078	solute carrier family 9 member A5	SLC9A5
6557	ENSG00000074803	HGNC:10910	solute carrier family 12 member 1	SLC12A1
6558	ENSG00000064651	HGNC:10911	solute carrier family 12 member 2	SLC12A2
6559	ENSG00000070915	HGNC:10912	solute carrier family 12 member 3	SLC12A3
6652	ENSG00000140263	HGNC:11184	sorbitol dehydrogenase	SORD
6717	ENSG00000075142	HGNC:11292	sorcin	SRI
6832	ENSG00000156502	HGNC:11471	Suv3 like RNA helicase	SUPV3L1
7037	ENSG00000072274	HGNC:11763	transferrin receptor	TFRC
7086	ENSG00000163931	HGNC:11834	transketolase	TKT
7251	ENSG00000074319	HGNC:15971	tumor susceptibility 101	TSG101
7288	ENSG00000104804	HGNC:12424	TUB like protein 2	TULP2
7512	ENSG00000122121	HGNC:12823	X-prolyl aminopeptidase 2	XPNPEP2
7538	ENSG00000128016	HGNC:12862	ZFP36 ring finger protein	ZFP36
7879	ENSG00000075785	HGNC:9788	RAB7A, member RAS oncogene family	RAB7A
7917	ENSG00000204463	HGNC:13919	BAG cochaperone 6	BAG6
8027	ENSG00000136738	HGNC:11357	signal transducing adaptor molecule	STAM
8029	ENSG00000107611	HGNC:2548	cubilin	CUBN
8218	ENSG00000070371	HGNC:2093	clathrin heavy chain like 1	CLTCL1
8277	ENSG00000007350	HGNC:11835	transketolase like 1	TKTL1
8516	ENSG00000077943	HGNC:6144	integrin subunit alpha 8	ITGA8
8751	ENSG00000143537	HGNC:193	ADAM metallopeptidase domain 15	ADAM15
8766	ENSG00000103769	HGNC:9760	RAB11A, member RAS oncogene family	RAB11A
8842	ENSG00000007062	HGNC:9454	prominin 1	PROM1
9033	ENSG00000107593	HGNC:9011	polycystin 2 like 1, transient receptor potential cation channel	PKD2L1
9052	ENSG00000013588	HGNC:9836	G protein-coupled receptor class C group 5 member A	GPRC5A
9146	ENSG00000185359	HGNC:4897	hepatocyte growth factor-regulated tyrosine kinase substrate	HGS
9230	ENSG00000185236	HGNC:9761	RAB11B, member RAS oncogene family	RAB11B
9373	ENSG00000137055	HGNC:9043	phospholipase A2 activating protein	PLAA
9445	ENSG00000136156	HGNC:6174	integral membrane protein 2B	ITM2B
9452	ENSG00000078596	HGNC:6173	integral membrane protein 2A	ITM2A
9525	ENSG00000119541	HGNC:10895	vacuolar protein sorting 4 homolog B	VPS4B
9567	ENSG00000100226	HGNC:4669	GTP binding protein 1	GTPBP1
9798	ENSG00000182149	HGNC:28977	IST1 factor associated with ESCRT-III	IST1
10015	ENSG00000170248	HGNC:8766	programmed cell death 6 interacting protein	PDCD6IP
10058	ENSG00000115657	HGNC:47	ATP binding cassette subfamily B member 6 (Langereis blood group)	ABCB6
10079	ENSG00000054793	HGNC:13540	ATPase phospholipid transporting 9A (putative)	ATP9A
10200	ENSG00000135698	HGNC:7214	M-phase phosphoprotein 6	MPHOSPH6
10438	ENSG00000197223	HGNC:29911	C1D nuclear receptor corepressor	C1D
10808	ENSG00000120694	HGNC:16969	heat shock protein family H (Hsp110) member 1	HSPH1
10905	ENSG00000198162	HGNC:6822	mannosidase alpha class 1A member 2	MAN1A2
10987	ENSG00000121022	HGNC:2240	COP9 signalosome subunit 5	COPS5
11267	ENSG00000159210	HGNC:17028	SNF8 subunit of ESCRT-II	SNF8
11332	ENSG00000097021	HGNC:24157	acyl-CoA thioesterase 7	ACOT7
11340	ENSG00000120699	HGNC:17035	exosome component 8	EXOSC8
22824	ENSG00000164070	HGNC:17041	heat shock protein family A (Hsp70) member 4 like	HSPA4L
22894	ENSG00000083520	HGNC:20604	DIS3 homolog, exosome endoribonuclease and 3'-5' exoribonuclease	DIS3
23016	ENSG00000075914	HGNC:28112	exosome component 7	EXOSC7
23400	ENSG00000159363	HGNC:30213	ATPase cation transporting 13A2	ATP13A2
23404	ENSG00000130713	HGNC:17097	exosome component 2	EXOSC2
23405	ENSG00000100697	HGNC:17098	dicer 1, ribonuclease III	DICER1
23517	ENSG00000039123	HGNC:18734	Mtr4 exosome RNA helicase	MTREX
23589	ENSG00000153048	HGNC:17150	calcium regulated heat stable protein 1	CARHSP1
23743	ENSG00000132840	HGNC:1048	betaine--homocysteine S-methyltransferase 2	BHMT2
25864	ENSG00000248487	HGNC:24538	abhydrolase domain containing 14A	ABHD14A
26022	ENSG00000006042	HGNC:24529	transmembrane protein 98	TMEM98
26027	ENSG00000162390	HGNC:18156	acyl-CoA thioesterase 11	ACOT11
26523	ENSG00000092847	HGNC:3262	argonaute RISC component 1	AGO1
27068	ENSG00000138777	HGNC:28883	inorganic pyrophosphatase 2	PPA2
27161	ENSG00000123908	HGNC:3263	argonaute RISC catalytic component 2	AGO2
27183	ENSG00000132612	HGNC:13488	vacuolar protein sorting 4 homolog A	VPS4A
27243	ENSG00000130724	HGNC:30216	charged multivesicular body protein 2A	CHMP2A
27254	ENSG00000172346	HGNC:30359	cold shock domain containing C2	CSDC2
27316	ENSG00000147274	HGNC:9910	RNA binding motif protein X-linked	RBMX
29126	ENSG00000120217	HGNC:17635	CD274 molecule	CD274
51010	ENSG00000107371	HGNC:17944	exosome component 3	EXOSC3
51013	ENSG00000171311	HGNC:17286	exosome component 1	EXOSC1
51704	ENSG00000167191	HGNC:13308	G protein-coupled receptor class C group 5 member B	GPRC5B
53916	ENSG00000167578	HGNC:9782	RAB4B, member RAS oncogene family	RAB4B
54512	ENSG00000178896	HGNC:18189	exosome component 4	EXOSC4
54663	ENSG00000133316	HGNC:25529	WD repeat domain 74	WDR74
54888	ENSG00000037474	HGNC:25994	NOP2/Sun RNA methyltransferase 2	NSUN2
55240	ENSG00000115107	HGNC:24592	STEAP3 metalloreductase	STEAP3
55507	ENSG00000111291	HGNC:13310	G protein-coupled receptor class C group 5 member D	GPRC5D
55512	ENSG00000103056	HGNC:14240	sphingomyelin phosphodiesterase 3	SMPD3
55890	ENSG00000170412	HGNC:13309	G protein-coupled receptor class C group 5 member C	GPRC5C
56624	ENSG00000188611	HGNC:18860	N-acylsphingosine amidohydrolase 2	ASAH2
56915	ENSG00000077348	HGNC:24662	exosome component 5	EXOSC5
57134	ENSG00000117643	HGNC:19080	mannosidase alpha class 1C member 1	MAN1C1
57393	ENSG00000147003	HGNC:29437	collectrin, amino acid transport regulator	CLTRN
57471	ENSG00000136541	HGNC:29208	ermin	ERMN
57535	ENSG00000116299	HGNC:29618	endosome-lysosome associated apoptosis and autophagy regulator 1	ELAPOR1
57826	ENSG00000123728	HGNC:21165	RAP2C, member of RAS oncogene family	RAP2C
79026	ENSG00000124942	HGNC:347	AHNAK nucleoprotein	AHNAK
79572	ENSG00000133657	HGNC:24113	ATPase 13A3	ATP13A3
81618	ENSG00000135916	HGNC:6175	integral membrane protein 2C	ITM2C
84076	ENSG00000151005	HGNC:25313	transketolase like 2	TKTL2
84239	ENSG00000127249	HGNC:25422	ATPase 13A4	ATP13A4
84418	ENSG00000120306	HGNC:30239	cysteine rich transmembrane module containing 1	CYSTM1
87178	ENSG00000138035	HGNC:23166	polyribonucleotide nucleotidyltransferase 1	PNPT1
91894	ENSG00000149300	HGNC:30531	chromosome 11 open reading frame 52	C11orf52
92747	ENSG00000125999	HGNC:16108	BPI fold containing family B member 1	BPIFB1
93035	ENSG00000205038	HGNC:20313	PKHD1 like 1	PKHD1L1
112574	ENSG00000178996	HGNC:19245	sorting nexin 18	SNX18
113146	ENSG00000185567	HGNC:20125	AHNAK nucleoprotein 2	AHNAK2
113220	ENSG00000136883	HGNC:21495	kinesin family member 12	KIF12
114990	ENSG00000168140	HGNC:18517	vasorin	VASN
115752	ENSG00000166938	HGNC:28698	DIS3 like exosome 3'-5' exoribonuclease	DIS3L
118460	ENSG00000223496	HGNC:19055	exosome component 6	EXOSC6
118491	ENSG00000156042	HGNC:30726	cilia and flagella associated protein 70	CFAP70
124975	ENSG00000167741	HGNC:26891	gamma-glutamyltransferase 6	GGT6
134526	ENSG00000172497	HGNC:24436	acyl-CoA thioesterase 12	ACOT12
139221	ENSG00000157502	HGNC:26583	PWWP domain containing 3B	PWWP3B
140683	ENSG00000131050	HGNC:16203	BPI fold containing family A member 2	BPIFA2
159163	ENSG00000169800	HGNC:23974	RNA binding motif protein Y-linked family 1 member F	RBMY1F
159963	ENSG00000148942	HGNC:28750	solute carrier family 5 member 12	SLC5A12
160728	ENSG00000256870	HGNC:19119	solute carrier family 5 member 8	SLC5A8
192669	ENSG00000126070	HGNC:18421	argonaute RISC catalytic component 3	AGO3
192670	ENSG00000134698	HGNC:18424	argonaute RISC component 4	AGO4
196441	ENSG00000133858	HGNC:28328	zinc finger C3H1-type containing	ZFC3H1
221357	ENSG00000182793	HGNC:19662	glutathione S-transferase alpha 5	GSTA5
222223	ENSG00000164659	HGNC:21945	endosome-lysosome associated apoptosis and autophagy regulator family member 2	ELAPOR2
257397	ENSG00000157625	HGNC:30681	TGF-beta activated kinase 1 (MAP3K7) binding protein 3	TAB3
344905	ENSG00000187527	HGNC:31789	ATPase 13A5	ATP13A5
345651	ENSG00000169067	HGNC:17780	actin beta like 2	ACTBL2
374868	ENSG00000166377	HGNC:13541	ATPase phospholipid transporting 9B (putative)	ATP9B
378948	ENSG00000242875	HGNC:23914	RNA binding motif protein Y-linked family 1 member B	RBMY1B
378949	ENSG00000244395	HGNC:23915	RNA binding motif protein Y-linked family 1 member D	RBMY1D
378950	ENSG00000242389	HGNC:23916	RNA binding motif protein Y-linked family 1 member E	RBMY1E
378951	ENSG00000226941	HGNC:23917	RNA binding motif protein Y-linked family 1 member J	RBMY1J
406899	ENSG00000284157	HGNC:31494	microRNA 106a	MIR106A
406900	ENSG00000208036	HGNC:31495	microRNA 106b	MIR106B
406950	ENSG00000208006	HGNC:31545	microRNA 16-1	MIR16-1
406951	ENSG00000198987	HGNC:31546	microRNA 16-2	MIR16-2
406952	ENSG00000284536	HGNC:31547	microRNA 17	MIR17
406971	ENSG00000284112	HGNC:31566	microRNA 195	MIR195
406982	ENSG00000283762	HGNC:31577	microRNA 20a	MIR20A
407015	ENSG00000199075	HGNC:31610	microRNA 26a-1	MIR26A1
407016	ENSG00000207789	HGNC:31611	microRNA 26a-2	MIR26A2
407017	ENSG00000199121	HGNC:31612	microRNA 26b	MIR26B
440081	ENSG00000214826	HGNC:2737	DEAD/H-box helicase 12, pseudogene	DDX12P
440915	ENSG00000204434	HGNC:30182	POTE ankyrin domain family member K, pseudogene	POTEKP
445582	ENSG00000188219	HGNC:33895	POTE ankyrin domain family member E	POTEE
494115	ENSG00000213516	HGNC:25073	RBMX like 1	RBMXL1
574032	ENSG00000284043	HGNC:32024	microRNA 20b	MIR20B
574411	ENSG00000284565	HGNC:32053	microRNA 451a	MIR451A
653269	ENSG00000196834	HGNC:37093	POTE ankyrin domain family member I	POTEI
653308	ENSG00000204147	HGNC:23456	N-acylsphingosine amidohydrolase 2B	ASAH2B
653781	ENSG00000222038	HGNC:37094	POTE ankyrin domain family member J	POTEJ
728378	ENSG00000196604	HGNC:33905	POTE ankyrin domain family member F	POTEF
100302090	ENSG00000256263	HGNC:37101	DEAD/H-box helicase 11 like 8 (pseudogene)	DDX11L8
100526760	ENSG00000114786	HGNC:38856	ABHD14A-ACY1 readthrough	ABHD14A-ACY1
112694756	ENSG00000285043	-	uncharaterized LOC112694756	LOC112694756
