# Supplementary material for: Genetic regulation of exosome biogenesis pathway in human adipose and muscle tissue and association with obesity and insulin resistance
Source: Research Square preprint supplement (doi:10.21203/rs.3.rs-6580546/v1), 2025-07-11
Supplement: Supplementary file 2 [file 318662194887f82d2ae74efb.xlsx]

## Sheet: S.Table-9
Supplementary Table 9: Adipose expressed exosome pathway genes are target genes for obesity and related gluco-cardio-metabolic trait-associated SNPs identified in GWAS datasets.
Target genes for gluco-metabolic trait GWAS-identified SNPs predicted by cS2G method, are members of exosome pathway, and transcript levels in adipose tissue associated with gluco-metabolic traits in AAGMEx cohort are shown
										Correlation of expression in adipose tissue
PUBMED ID/Study ID	DISEASETRAIT	CHR	POS (hg38)	SNP	gene	cS2G Score	INFO	Probe_Id	Entrez Gene_ID	BMI Spearman_partial_corr	BMI _pval	Matsuda Spearman_partial_corr	Matsuda p-value	SI Spearman_partial_corr	SI _pval	final symbol	Definition
30664634	Body fat distribution (arm fat ratio)	5	128083158	rs3812049	SLC12A2	1	|Promoter=1|ABC=1	ILMN_1720996	6558	-0.127578	0.0434479	0.116788	0.0674485	0.147483	0.0253032	SLC12A2	solute carrier family 12 (sodium/potassium/chloride transporters), member 2 (SLC12A2), mRNA.
30664634	Body fat distribution (leg fat ratio)	5	128083158	rs3812049	SLC12A2	1	|Promoter=1|ABC=1	ILMN_1720996	6558	-0.127578	0.0434479	0.116788	0.0674485	0.147483	0.0253032	SLC12A2	solute carrier family 12 (sodium/potassium/chloride transporters), member 2 (SLC12A2), mRNA.
30664634	Body fat distribution (trunk fat ratio)	5	128083158	rs3812049	SLC12A2	1	|Promoter=1|ABC=1	ILMN_1720996	6558	-0.127578	0.0434479	0.116788	0.0674485	0.147483	0.0253032	SLC12A2	solute carrier family 12 (sodium/potassium/chloride transporters), member 2 (SLC12A2), mRNA.
30595370	Body mass index	1	16992516	rs2076603	ATP13A2	0.755	|Exon=1	ILMN_1704164	23400	0.0808227	0.201896	-0.192276	0.00245629	-0.0929415	0.160054	ATP13A2	ATPase type 13A2 (ATP13A2), mRNA.
30239722	Body mass index	6	31645962	rs3130048	BAG6	1	|Promoter=1	ILMN_2390416	7917	-0.244434	9.12497e-05	0.199576	0.00165523	0.118675	0.0724411	BAG6	HLA-B associated transcript 3 (BAT3), transcript variant 3, mRNA.
28892062	Body mass index	2	20233457	rs111612372	SDC1	1	|GTeX_Finemapped=1|Roadmap=1	ILMN_1815308	6382	0.175556	0.00528482	-0.216537	0.000627107	-0.16619	0.0115948	SDC1	syndecan 1 (SDC1), transcript variant 1, mRNA.
25673413	Body mass index	3	108101216	rs7640424	CD47	1	|EpiMap=1|Roadmap=1|ABC=1	ILMN_1771333	961	0.161809	0.010238	-0.0817416	0.201364	0.0587279	0.375313	CD47	CD47 molecule (CD47), transcript variant 2, mRNA.
31669095	Body mass index	3	108103398	rs1561029	CD47	1	|ABC=1	ILMN_1771333	961	0.161809	0.010238	-0.0817416	0.201364	0.0587279	0.375313	CD47	CD47 molecule (CD47), transcript variant 2, mRNA.
28270201	Cholesterol, total	19	44908822	rs7412	APOE	1	|Exon=1|Roadmap=1	ILMN_1740938	348	-0.306663	7.26693e-07	0.189615	0.00282665	0.262964	5.39993e-05	APOE	apolipoprotein E (APOE), mRNA.
29221444	Coronary artery calcified atherosclerotic plaque (90 or 130 HU threshold) in type 2 diabetes	7	30846884	rs7791980	AQP1	1	|EpiMap=1	ILMN_1776857	358	0.271452	1.29291e-05	-0.17281	0.0065858	-0.233638	0.000352144	AQP1	aquaporin 1 (Colton blood group) (AQP1), mRNA.
29221444	Coronary artery calcified atherosclerotic plaque (90 or 130 HU threshold) in type 2 diabetes	7	30846884	rs7791980	AQP1	1	|EpiMap=1	ILMN_1681103	358	0.214657	0.000617468	-0.108812	0.0885636	-0.157813	0.0166049	AQP1	aquaporin 1 (Colton blood group) (AQP1), mRNA.
29212778	Coronary artery disease	6	31951801	rs2072633	CFB	0.93	|Exon=1	ILMN_1774287	629	0.344281	2.15187e-08	-0.352543	1.30945e-08	-0.203646	0.00190782	CFB	complement factor B (CFB), mRNA.
29212778	Coronary artery disease	19	44908822	rs7412	APOE	1	|Exon=1|Roadmap=1	ILMN_1740938	348	-0.306663	7.26693e-07	0.189615	0.00282665	0.262964	5.39993e-05	APOE	apolipoprotein E (APOE), mRNA.
32469254	Coronary artery disease	19	44905371	rs769446	APOE	1	|Promoter=1|Roadmap=1|ABC=1	ILMN_1740938	348	-0.306663	7.26693e-07	0.189615	0.00282665	0.262964	5.39993e-05	APOE	apolipoprotein E (APOE), mRNA.
28714975	Coronary artery disease (myocardial infarction, percutaneous transluminal coronary angioplasty, coronary artery bypass grafting, angina or chromic ischemic heart disease)	6	31920590	rs3130683	C2	0.755	|Promoter=1|Roadmap=1	ILMN_1710740	717	0.466286	5.77316e-15	-0.456082	4.84057e-14	-0.255151	9.09872e-05	C2	complement component 2 (C2), mRNA.
28714975	Coronary artery disease (myocardial infarction, percutaneous transluminal coronary angioplasty, coronary artery bypass grafting, angina or chromic ischemic heart disease)	19	44908822	rs7412	APOE	1	|Exon=1|Roadmap=1	ILMN_1740938	348	-0.306663	7.26693e-07	0.189615	0.00282665	0.262964	5.39993e-05	APOE	apolipoprotein E (APOE), mRNA.
18439548	C-reactive protein	19	44906745	rs769449	APOE	1	|Promoter=1|Roadmap=1|ABC=1	ILMN_1740938	348	-0.306663	7.26693e-07	0.189615	0.00282665	0.262964	5.39993e-05	APOE	apolipoprotein E (APOE), mRNA.
22939635	C-reactive protein	19	44900155	rs1160985	APOE	1	|GTeX_Finemapped=1	ILMN_1740938	348	-0.306663	7.26693e-07	0.189615	0.00282665	0.262964	5.39993e-05	APOE	apolipoprotein E (APOE), mRNA.
31900758	C-reactive protein levels	19	44908684	rs429358	APOE	1	|Exon=1|EpiMap=1|Roadmap=1	ILMN_1740938	348	-0.306663	7.26693e-07	0.189615	0.00282665	0.262964	5.39993e-05	APOE	apolipoprotein E (APOE), mRNA.
31217584	C-reactive protein levels	19	44900155	rs1160985	APOE	1	|GTeX_Finemapped=1	ILMN_1740938	348	-0.306663	7.26693e-07	0.189615	0.00282665	0.262964	5.39993e-05	APOE	apolipoprotein E (APOE), mRNA.
31217584	C-reactive protein levels	19	44906745	rs769449	APOE	1	|Promoter=1|Roadmap=1|ABC=1	ILMN_1740938	348	-0.306663	7.26693e-07	0.189615	0.00282665	0.262964	5.39993e-05	APOE	apolipoprotein E (APOE), mRNA.
30487518	Diastolic blood pressure	1	155192276	rs4072037	MUC1	0.76	|Exon=1|EpiMap=1|Roadmap=1|ABC=1	ILMN_2371911	4582	0.303001	9.98356e-07	-0.297287	2.06685e-06	-0.0946687	0.152397	MUC1	mucin 1, cell surface associated (MUC1), transcript variant 5, mRNA.
30487518	Diastolic blood pressure	1	155192276	rs4072037	MUC1	0.76	|Exon=1|EpiMap=1|Roadmap=1|ABC=1	ILMN_1756992	4582	0.257102	3.74874e-05	-0.304167	1.16167e-06	-0.113431	0.0860812	MUC1	mucin 1, cell surface associated (MUC1), transcript variant 6, mRNA.
28135244	Diastolic blood pressure	6	31601927	rs2507960	BAG6	1	|GTeX_Finemapped=1	ILMN_2390416	7917	-0.244434	9.12497e-05	0.199576	0.00165523	0.118675	0.0724411	BAG6	HLA-B associated transcript 3 (BAT3), transcript variant 3, mRNA.
28739976	Diastolic blood pressure	6	31638615	rs2077492	BAG6	1	|GTeX_Finemapped=1	ILMN_2390416	7917	-0.244434	9.12497e-05	0.199576	0.00165523	0.118675	0.0724411	BAG6	HLA-B associated transcript 3 (BAT3), transcript variant 3, mRNA.
30224653	Diastolic blood pressure	5	133061659	rs55747751	HSPA4	1	|GTeX_Finemapped=1|eQTLGen_Finemapped=1	ILMN_1755134	3308	0.103276	0.102596	-0.221825	0.000456185	-0.120427	0.0682944	HSPA4	heat shock 70kDa protein 4 (HSPA4), mRNA.
27618452	Diastolic blood pressure	2	55581918	rs1975487	PNPT1	1	|EpiMap=1	ILMN_2051408	87178	0.121544	0.0544612	-0.0543741	0.395821	-0.181512	0.00576702	PNPT1	polyribonucleotide nucleotidyltransferase 1 (PNPT1), mRNA.
25961943	HDL cholesterol	19	44908684	rs429358	APOE	1	|Exon=1|EpiMap=1|Roadmap=1	ILMN_1740938	348	-0.306663	7.26693e-07	0.189615	0.00282665	0.262964	5.39993e-05	APOE	apolipoprotein E (APOE), mRNA.
28270201	HDL cholesterol	19	44908822	rs7412	APOE	1	|Exon=1|Roadmap=1	ILMN_1740938	348	-0.306663	7.26693e-07	0.189615	0.00282665	0.262964	5.39993e-05	APOE	apolipoprotein E (APOE), mRNA.
21386085	HDL Cholesterol - Triglycerides (HDLC-TG)	19	44911194	rs439401	APOE	0.658	|GTeX_Finemapped=1	ILMN_1740938	348	-0.306663	7.26693e-07	0.189615	0.00282665	0.262964	5.39993e-05	APOE	apolipoprotein E (APOE), mRNA.
31675503	HDL cholesterol levels	19	44908822	rs7412	APOE	1	|Exon=1|Roadmap=1	ILMN_1740938	348	-0.306663	7.26693e-07	0.189615	0.00282665	0.262964	5.39993e-05	APOE	apolipoprotein E (APOE), mRNA.
32203549	HDL cholesterol levels	19	44908684	rs429358	APOE	1	|Exon=1|EpiMap=1|Roadmap=1	ILMN_1740938	348	-0.306663	7.26693e-07	0.189615	0.00282665	0.262964	5.39993e-05	APOE	apolipoprotein E (APOE), mRNA.
26690388	HDL cholesterol levels	19	44906745	rs769449	APOE	1	|Promoter=1|Roadmap=1|ABC=1	ILMN_1740938	348	-0.306663	7.26693e-07	0.189615	0.00282665	0.262964	5.39993e-05	APOE	apolipoprotein E (APOE), mRNA.
32203549	HDL cholesterol levels	2	20171619	rs907866	SDC1	1	|EpiMap=1|Roadmap=1|PCHiC_Javierre=1|PCHiC_Jung=1	ILMN_1815308	6382	0.175556	0.00528482	-0.216537	0.000627107	-0.16619	0.0115948	SDC1	syndecan 1 (SDC1), transcript variant 1, mRNA.
32203549	HDL cholesterol levels	5	79126136	rs3733890	BHMT	1	|Exon=1	ILMN_1656638	635	0.244262	9.23329e-05	-0.201905	0.00145521	-0.12361	0.0612611	BHMT	betaine-homocysteine methyltransferase (BHMT), mRNA.
32203549	HDL cholesterol levels	5	128014857	rs3749748	SLC12A2	1	|eQTLGen_Finemapped=1	ILMN_1720996	6558	-0.127578	0.0434479	0.116788	0.0674485	0.147483	0.0253032	SLC12A2	solute carrier family 12 (sodium/potassium/chloride transporters), member 2 (SLC12A2), mRNA.
32203549	HDL cholesterol levels	5	133108436	rs72801474	HSPA4	1	|GTeX_Finemapped=1	ILMN_1755134	3308	0.103276	0.102596	-0.221825	0.000456185	-0.120427	0.0682944	HSPA4	heat shock 70kDa protein 4 (HSPA4), mRNA.
29507422	High density lipoprotein cholesterol levels	19	44906745	rs769449	APOE	1	|Promoter=1|Roadmap=1|ABC=1	ILMN_1740938	348	-0.306663	7.26693e-07	0.189615	0.00282665	0.262964	5.39993e-05	APOE	apolipoprotein E (APOE), mRNA.
29507422	High density lipoprotein cholesterol levels	19	44908684	rs429358	APOE	1	|Exon=1|EpiMap=1|Roadmap=1	ILMN_1740938	348	-0.306663	7.26693e-07	0.189615	0.00282665	0.262964	5.39993e-05	APOE	apolipoprotein E (APOE), mRNA.
29507422	High density lipoprotein cholesterol levels	19	44908822	rs7412	APOE	1	|Exon=1|Roadmap=1	ILMN_1740938	348	-0.306663	7.26693e-07	0.189615	0.00282665	0.262964	5.39993e-05	APOE	apolipoprotein E (APOE), mRNA.
31928498	High density lipoprotein cholesterol levels	5	133108436	rs72801474	HSPA4	1	|GTeX_Finemapped=1	ILMN_1755134	3308	0.103276	0.102596	-0.221825	0.000456185	-0.120427	0.0682944	HSPA4	heat shock 70kDa protein 4 (HSPA4), mRNA.
25673412	Hip circumference adjusted for BMI	1	17001705	rs6657613	ATP13A2	0.943	|Promoter=1|eQTLGen_Finemapped=1	ILMN_1704164	23400	0.0808227	0.201896	-0.192276	0.00245629	-0.0929415	0.160054	ATP13A2	ATPase type 13A2 (ATP13A2), mRNA.
23726366	LDL cholesterol	19	44900155	rs1160985	APOE	1	|GTeX_Finemapped=1	ILMN_1740938	348	-0.306663	7.26693e-07	0.189615	0.00282665	0.262964	5.39993e-05	APOE	apolipoprotein E (APOE), mRNA.
23067351	LDL cholesterol	19	44908822	rs7412	APOE	1	|Exon=1|Roadmap=1	ILMN_1740938	348	-0.306663	7.26693e-07	0.189615	0.00282665	0.262964	5.39993e-05	APOE	apolipoprotein E (APOE), mRNA.
28334899	LDL cholesterol levels	19	44912383	rs445925	APOE	0.882	|GTeX_Finemapped=1	ILMN_1740938	348	-0.306663	7.26693e-07	0.189615	0.00282665	0.262964	5.39993e-05	APOE	apolipoprotein E (APOE), mRNA.
31675503	LDL cholesterol levels	19	44908822	rs7412	APOE	1	|Exon=1|Roadmap=1	ILMN_1740938	348	-0.306663	7.26693e-07	0.189615	0.00282665	0.262964	5.39993e-05	APOE	apolipoprotein E (APOE), mRNA.
26763881	LDL cholesterol levels	19	44900155	rs1160985	APOE	1	|GTeX_Finemapped=1	ILMN_1740938	348	-0.306663	7.26693e-07	0.189615	0.00282665	0.262964	5.39993e-05	APOE	apolipoprotein E (APOE), mRNA.
32203549	LDL cholesterol levels	2	20171619	rs907866	SDC1	1	|EpiMap=1|Roadmap=1|PCHiC_Javierre=1|PCHiC_Jung=1	ILMN_1815308	6382	0.175556	0.00528482	-0.216537	0.000627107	-0.16619	0.0115948	SDC1	syndecan 1 (SDC1), transcript variant 1, mRNA.
22286219	Lipid metabolism phenotypes	19	44908822	rs7412	APOE	1	|Exon=1|Roadmap=1	ILMN_1740938	348	-0.306663	7.26693e-07	0.189615	0.00282665	0.262964	5.39993e-05	APOE	apolipoprotein E (APOE), mRNA.
24023260	Lipid traits	19	44908822	rs7412	APOE	1	|Exon=1|Roadmap=1	ILMN_1740938	348	-0.306663	7.26693e-07	0.189615	0.00282665	0.262964	5.39993e-05	APOE	apolipoprotein E (APOE), mRNA.
24386095	Lipid traits	19	44900155	rs1160985	APOE	1	|GTeX_Finemapped=1	ILMN_1740938	348	-0.306663	7.26693e-07	0.189615	0.00282665	0.262964	5.39993e-05	APOE	apolipoprotein E (APOE), mRNA.
32247823	Liver fat content (MRI proton density fat fraction measure)	19	44908684	rs429358	APOE	1	|Exon=1|EpiMap=1|Roadmap=1	ILMN_1740938	348	-0.306663	7.26693e-07	0.189615	0.00282665	0.262964	5.39993e-05	APOE	apolipoprotein E (APOE), mRNA.
31969989	Low density lipoprotein cholesterol levels	19	44908822	rs7412	APOE	1	|Exon=1|Roadmap=1	ILMN_1740938	348	-0.306663	7.26693e-07	0.189615	0.00282665	0.262964	5.39993e-05	APOE	apolipoprotein E (APOE), mRNA.
29507422	Low density lipoprotein cholesterol levels	19	44908684	rs429358	APOE	1	|Exon=1|EpiMap=1|Roadmap=1	ILMN_1740938	348	-0.306663	7.26693e-07	0.189615	0.00282665	0.262964	5.39993e-05	APOE	apolipoprotein E (APOE), mRNA.
29403010	Low density lipoprotein cholesterol levels	19	44905371	rs769446	APOE	1	|Promoter=1|Roadmap=1|ABC=1	ILMN_1740938	348	-0.306663	7.26693e-07	0.189615	0.00282665	0.262964	5.39993e-05	APOE	apolipoprotein E (APOE), mRNA.
29507422	Low density lipoprotein cholesterol levels	19	44906745	rs769449	APOE	1	|Promoter=1|Roadmap=1|ABC=1	ILMN_1740938	348	-0.306663	7.26693e-07	0.189615	0.00282665	0.262964	5.39993e-05	APOE	apolipoprotein E (APOE), mRNA.
31217584	Low density lipoprotein cholesterol levels	19	44900155	rs1160985	APOE	1	|GTeX_Finemapped=1	ILMN_1740938	348	-0.306663	7.26693e-07	0.189615	0.00282665	0.262964	5.39993e-05	APOE	apolipoprotein E (APOE), mRNA.
23563609	Obesity (early onset extreme)	12	6356915	rs3782724	SCNN1A	1	|Promoter=1	ILMN_1713995	6337	0.398385	5.62439e-11	-0.371669	1.7809e-09	-0.198253	0.0025251	SCNN1A	sodium channel, nonvoltage-gated 1 alpha (SCNN1A), mRNA.
23251661	Obesity-related traits	12	5872187	rs7307889	SCNN1A	1	|GTeX_Finemapped=1	ILMN_1713995	6337	0.398385	5.62439e-11	-0.371669	1.7809e-09	-0.198253	0.0025251	SCNN1A	sodium channel, nonvoltage-gated 1 alpha (SCNN1A), mRNA.
31928498	Systolic blood pressure	6	31604867	rs2857594	CFB	1	|GTeX_Finemapped=1	ILMN_1774287	629	0.344281	2.15187e-08	-0.352543	1.30945e-08	-0.203646	0.00190782	CFB	complement factor B (CFB), mRNA.
27841878	Systolic blood pressure	11	17330136	rs757081	NUCB2	1	|Exon=1	ILMN_1655913	4925	0.197713	0.00164474	-0.320695	2.73697e-07	-0.244013	0.000186134	NUCB2	nucleobindin 2 (NUCB2), mRNA.
30578418	Systolic blood pressure	19	44908822	rs7412	APOE	1	|Exon=1|Roadmap=1	ILMN_1740938	348	-0.306663	7.26693e-07	0.189615	0.00282665	0.262964	5.39993e-05	APOE	apolipoprotein E (APOE), mRNA.
30224653	Systolic blood pressure	7	30893838	rs10233127	AQP1	1	|GTeX_Finemapped=1|Roadmap=1|ABC=1	ILMN_1776857	358	0.271452	1.29291e-05	-0.17281	0.0065858	-0.233638	0.000352144	AQP1	aquaporin 1 (Colton blood group) (AQP1), mRNA.
30595370	Systolic blood pressure	16	4369853	rs75345455	VASN	1	|ABC=1	ILMN_1667295	114990	0.202262	0.00127388	-0.171316	0.00707615	-0.0418213	0.527993	VASN	vasorin (VASN), mRNA.
30224653	Systolic blood pressure	7	30893838	rs10233127	AQP1	1	|GTeX_Finemapped=1|Roadmap=1|ABC=1	ILMN_1681103	358	0.214657	0.000617468	-0.108812	0.0885636	-0.157813	0.0166049	AQP1	aquaporin 1 (Colton blood group) (AQP1), mRNA.
30595370	Systolic blood pressure	7	131638951	rs75511781	PODXL	1	|EpiMap=1|PCHiC_Javierre=1|ABC=1	ILMN_2413158	5420	-0.121319	0.0549139	0.117074	0.0667737	0.153437	0.0199065	PODXL	podocalyxin-like (PODXL), transcript variant 1, mRNA.
27618452	Systolic blood pressure	2	55581918	rs1975487	PNPT1	1	|EpiMap=1	ILMN_2051408	87178	0.121544	0.0544612	-0.0543741	0.395821	-0.181512	0.00576702	PNPT1	polyribonucleotide nucleotidyltransferase 1 (PNPT1), mRNA.
26690388	Total cholesterol levels	19	44912383	rs445925	APOE	0.882	|GTeX_Finemapped=1	ILMN_1740938	348	-0.306663	7.26693e-07	0.189615	0.00282665	0.262964	5.39993e-05	APOE	apolipoprotein E (APOE), mRNA.
31675503	Total cholesterol levels	19	44908822	rs7412	APOE	1	|Exon=1|Roadmap=1	ILMN_1740938	348	-0.306663	7.26693e-07	0.189615	0.00282665	0.262964	5.39993e-05	APOE	apolipoprotein E (APOE), mRNA.
29403010	Total cholesterol levels	19	44905371	rs769446	APOE	1	|Promoter=1|Roadmap=1|ABC=1	ILMN_1740938	348	-0.306663	7.26693e-07	0.189615	0.00282665	0.262964	5.39993e-05	APOE	apolipoprotein E (APOE), mRNA.
29403010	Total cholesterol levels	19	44908684	rs429358	APOE	1	|Exon=1|EpiMap=1|Roadmap=1	ILMN_1740938	348	-0.306663	7.26693e-07	0.189615	0.00282665	0.262964	5.39993e-05	APOE	apolipoprotein E (APOE), mRNA.
29507422	Total cholesterol levels	19	44906745	rs769449	APOE	1	|Promoter=1|Roadmap=1|ABC=1	ILMN_1740938	348	-0.306663	7.26693e-07	0.189615	0.00282665	0.262964	5.39993e-05	APOE	apolipoprotein E (APOE), mRNA.
31217584	Total cholesterol levels	19	44900155	rs1160985	APOE	1	|GTeX_Finemapped=1	ILMN_1740938	348	-0.306663	7.26693e-07	0.189615	0.00282665	0.262964	5.39993e-05	APOE	apolipoprotein E (APOE), mRNA.
29507422	Total cholesterol levels	2	20168212	rs11899121	SDC1	1	|EpiMap=1|PCHiC_Javierre=1|PCHiC_Jung=1	ILMN_1815308	6382	0.175556	0.00528482	-0.216537	0.000627107	-0.16619	0.0115948	SDC1	syndecan 1 (SDC1), transcript variant 1, mRNA.
29507422	Total cholesterol levels	2	20169940	rs870527	SDC1	1	|EpiMap=1|Roadmap=1|PCHiC_Javierre=1|PCHiC_Jung=1	ILMN_1815308	6382	0.175556	0.00528482	-0.216537	0.000627107	-0.16619	0.0115948	SDC1	syndecan 1 (SDC1), transcript variant 1, mRNA.
30926973	Triglyceride levels	19	44911194	rs439401	APOE	0.658	|GTeX_Finemapped=1	ILMN_1740938	348	-0.306663	7.26693e-07	0.189615	0.00282665	0.262964	5.39993e-05	APOE	apolipoprotein E (APOE), mRNA.
30698716	Triglyceride levels	5	133106498	rs56076449	HSPA4	0.962	|eQTLGen_Finemapped=1	ILMN_1755134	3308	0.103276	0.102596	-0.221825	0.000456185	-0.120427	0.0682944	HSPA4	heat shock 70kDa protein 4 (HSPA4), mRNA.
31928498	Triglyceride levels	6	31604867	rs2857594	CFB	1	|GTeX_Finemapped=1	ILMN_1774287	629	0.344281	2.15187e-08	-0.352543	1.30945e-08	-0.203646	0.00190782	CFB	complement factor B (CFB), mRNA.
31217584	Triglyceride levels	19	44906745	rs769449	APOE	1	|Promoter=1|Roadmap=1|ABC=1	ILMN_1740938	348	-0.306663	7.26693e-07	0.189615	0.00282665	0.262964	5.39993e-05	APOE	apolipoprotein E (APOE), mRNA.
32203549	Triglyceride levels	2	20174525	rs6531216	SDC1	1	|EpiMap=1|PCHiC_Javierre=1|PCHiC_Jung=1	ILMN_1815308	6382	0.175556	0.00528482	-0.216537	0.000627107	-0.16619	0.0115948	SDC1	syndecan 1 (SDC1), transcript variant 1, mRNA.
32154731	Triglyceride levels	5	133108436	rs72801474	HSPA4	1	|GTeX_Finemapped=1	ILMN_1755134	3308	0.103276	0.102596	-0.221825	0.000456185	-0.120427	0.0682944	HSPA4	heat shock 70kDa protein 4 (HSPA4), mRNA.
19060911	Triglycerides	19	44911194	rs439401	APOE	0.658	|GTeX_Finemapped=1	ILMN_1740938	348	-0.306663	7.26693e-07	0.189615	0.00282665	0.262964	5.39993e-05	APOE	apolipoprotein E (APOE), mRNA.
29507422	Triglycerides	19	44879780	rs11673139	APOE	1	|EpiMap=1	ILMN_1740938	348	-0.306663	7.26693e-07	0.189615	0.00282665	0.262964	5.39993e-05	APOE	apolipoprotein E (APOE), mRNA.
29507422	Triglycerides	19	44906745	rs769449	APOE	1	|Promoter=1|Roadmap=1|ABC=1	ILMN_1740938	348	-0.306663	7.26693e-07	0.189615	0.00282665	0.262964	5.39993e-05	APOE	apolipoprotein E (APOE), mRNA.
29507422	Triglycerides	19	44908684	rs429358	APOE	1	|Exon=1|EpiMap=1|Roadmap=1	ILMN_1740938	348	-0.306663	7.26693e-07	0.189615	0.00282665	0.262964	5.39993e-05	APOE	apolipoprotein E (APOE), mRNA.
29507422	Triglycerides	19	44908822	rs7412	APOE	1	|Exon=1|Roadmap=1	ILMN_1740938	348	-0.306663	7.26693e-07	0.189615	0.00282665	0.262964	5.39993e-05	APOE	apolipoprotein E (APOE), mRNA.
30297969	Type 2 diabetes	19	44908684	rs429358	APOE	1	|Exon=1|EpiMap=1|Roadmap=1	ILMN_1740938	348	-0.306663	7.26693e-07	0.189615	0.00282665	0.262964	5.39993e-05	APOE	apolipoprotein E (APOE), mRNA.
28448500	Waist circumference adjusted for BMI (joint analysis main effects and physical activity interaction)	1	17005181	rs3738814	ATP13A2	0.727	|eQTLGen_Finemapped=1	ILMN_1704164	23400	0.0808227	0.201896	-0.192276	0.00245629	-0.0929415	0.160054	ATP13A2	ATPase type 13A2 (ATP13A2), mRNA.
28448500	Waist circumference adjusted for BMI (joint analysis main effects and physical activity interaction)	11	17294482	rs1330	NUCB2	1	|Promoter=1|GTeX_Finemapped=1|Roadmap=1	ILMN_1655913	4925	0.197713	0.00164474	-0.320695	2.73697e-07	-0.244013	0.000186134	NUCB2	nucleobindin 2 (NUCB2), mRNA.
28448500	Waist circumference adjusted for BMI in active individuals	1	17005181	rs3738814	ATP13A2	0.727	|eQTLGen_Finemapped=1	ILMN_1704164	23400	0.0808227	0.201896	-0.192276	0.00245629	-0.0929415	0.160054	ATP13A2	ATPase type 13A2 (ATP13A2), mRNA.
28448500	Waist circumference adjusted for BMI in active individuals	11	17294482	rs1330	NUCB2	1	|Promoter=1|GTeX_Finemapped=1|Roadmap=1	ILMN_1655913	4925	0.197713	0.00164474	-0.320695	2.73697e-07	-0.244013	0.000186134	NUCB2	nucleobindin 2 (NUCB2), mRNA.
31669095	Waist circumference adjusted for body mass index	3	53254135	rs115942480	TKT	1	|ABC=1	ILMN_1736597	7086	-0.281148	6.0807e-06	0.114254	0.0736559	0.0702927	0.288442	TKT	transketolase (Wernicke-Korsakoff syndrome) (TKT), mRNA.
28448500	Waist circumference adjusted for body mass index	11	17294482	rs1330	NUCB2	1	|Promoter=1|GTeX_Finemapped=1|Roadmap=1	ILMN_1655913	4925	0.197713	0.00164474	-0.320695	2.73697e-07	-0.244013	0.000186134	NUCB2	nucleobindin 2 (NUCB2), mRNA.
31669095	Waist circumference adjusted for body mass index	1	16996773	rs56274609	ATP13A2	1	|EpiMap=1	ILMN_1704164	23400	0.0808227	0.201896	-0.192276	0.00245629	-0.0929415	0.160054	ATP13A2	ATPase type 13A2 (ATP13A2), mRNA.
31669095	Waist circumference adjusted for body mass index	5	133108436	rs72801474	HSPA4	1	|GTeX_Finemapped=1	ILMN_1755134	3308	0.103276	0.102596	-0.221825	0.000456185	-0.120427	0.0682944	HSPA4	heat shock 70kDa protein 4 (HSPA4), mRNA.
30239722	Waist-hip ratio	11	62545314	rs2509967	AHNAK	0.802	|Promoter=1|Roadmap=1|PCHiC_Jung=1|ABC=1	ILMN_1714567	79026	0.44197	1.99618e-13	-0.31764	3.59928e-07	-0.330741	2.83927e-07	AHNAK	AHNAK nucleoprotein (AHNAK), transcript variant 1, mRNA.
30575882	Waist-hip ratio	11	62544922	rs2428549	AHNAK	0.802	|Promoter=1|PCHiC_Jung=1|ABC=1	ILMN_1714567	79026	0.44197	1.99618e-13	-0.31764	3.59928e-07	-0.330741	2.83927e-07	AHNAK	AHNAK nucleoprotein (AHNAK), transcript variant 1, mRNA.
30239722	Waist-hip ratio	11	62545314	rs2509967	AHNAK	0.802	|Promoter=1|Roadmap=1|PCHiC_Jung=1|ABC=1	ILMN_1792495	79026	0.312398	4.38116e-07	-0.334669	7.52186e-08	-0.206382	0.00165046	AHNAK	AHNAK nucleoprotein (AHNAK), transcript variant 1, mRNA.
30575882	Waist-hip ratio	11	62544922	rs2428549	AHNAK	0.802	|Promoter=1|PCHiC_Jung=1|ABC=1	ILMN_1792495	79026	0.312398	4.38116e-07	-0.334669	7.52186e-08	-0.206382	0.00165046	AHNAK	AHNAK nucleoprotein (AHNAK), transcript variant 1, mRNA.
30595370	Waist-hip ratio	16	4372606	rs7200336	VASN	0.931	|Promoter=1|Roadmap=1|ABC=1	ILMN_1667295	114990	0.202262	0.00127388	-0.171316	0.00707615	-0.0418213	0.527993	VASN	vasorin (VASN), mRNA.
30595370	Waist-hip ratio	11	62425459	rs2509963	AHNAK	1	|GTeX_Finemapped=1|eQTLGen_Finemapped=1|PCHiC_Javierre=1|PCHiC_Jung=1	ILMN_1714567	79026	0.44197	1.99618e-13	-0.31764	3.59928e-07	-0.330741	2.83927e-07	AHNAK	AHNAK nucleoprotein (AHNAK), transcript variant 1, mRNA.
30595370	Waist-hip ratio	11	62425459	rs2509963	AHNAK	1	|GTeX_Finemapped=1|eQTLGen_Finemapped=1|PCHiC_Javierre=1|PCHiC_Jung=1	ILMN_1792495	79026	0.312398	4.38116e-07	-0.334669	7.52186e-08	-0.206382	0.00165046	AHNAK	AHNAK nucleoprotein (AHNAK), transcript variant 1, mRNA.
30239722	Waist-hip ratio	19	44908684	rs429358	APOE	1	|Exon=1|EpiMap=1|Roadmap=1	ILMN_1740938	348	-0.306663	7.26693e-07	0.189615	0.00282665	0.262964	5.39993e-05	APOE	apolipoprotein E (APOE), mRNA.
30595370	Waist-hip ratio	7	30896285	rs12112380	AQP1	1	|EpiMap=1|ABC=1	ILMN_1776857	358	0.271452	1.29291e-05	-0.17281	0.0065858	-0.233638	0.000352144	AQP1	aquaporin 1 (Colton blood group) (AQP1), mRNA.
30575882	Waist-hip ratio	16	4365695	rs3747577	VASN	1	|ABC=1	ILMN_1667295	114990	0.202262	0.00127388	-0.171316	0.00707615	-0.0418213	0.527993	VASN	vasorin (VASN), mRNA.
30595370	Waist-hip ratio	7	30896285	rs12112380	AQP1	1	|EpiMap=1|ABC=1	ILMN_1681103	358	0.214657	0.000617468	-0.108812	0.0885636	-0.157813	0.0166049	AQP1	aquaporin 1 (Colton blood group) (AQP1), mRNA.
30239722	Waist-hip ratio	5	133013962	rs4705986	HSPA4	1	|GTeX_Finemapped=1|eQTLGen_Finemapped=1|PCHiC_Jung=1	ILMN_1755134	3308	0.103276	0.102596	-0.221825	0.000456185	-0.120427	0.0682944	HSPA4	heat shock 70kDa protein 4 (HSPA4), mRNA.
30595370	Waist-hip ratio	5	133108436	rs72801474	HSPA4	1	|GTeX_Finemapped=1	ILMN_1755134	3308	0.103276	0.102596	-0.221825	0.000456185	-0.120427	0.0682944	HSPA4	heat shock 70kDa protein 4 (HSPA4), mRNA.
31669095	Waist-to-hip ratio adjusted for BMI	7	5527040	rs852425	ACTB	0.744	|EpiMap=1|Cicero=1	ILMN_2152131	60	0.308835	6.00746e-07	-0.377116	9.84762e-10	-0.21505	0.00103036	ACTB	actin, beta (ACTB), mRNA.
31669095	Waist-to-hip ratio adjusted for BMI	7	5527040	rs852425	ACTB	0.744	|EpiMap=1|Cicero=1	ILMN_2038777	60	0.231938	0.000209792	-0.314814	4.62438e-07	-0.18745	0.00433545	ACTB	actin, beta (ACTB), mRNA.
31669095	Waist-to-hip ratio adjusted for BMI	7	5527040	rs852425	ACTB	0.744	|EpiMap=1|Cicero=1	ILMN_1777296	60	0.148268	0.0187591	-0.249557	7.58985e-05	-0.0897054	0.175172	ACTB	actin, beta (ACTB), mRNA.
30575882	Waist-to-hip ratio adjusted for BMI	11	62544922	rs2428549	AHNAK	0.802	|Promoter=1|PCHiC_Jung=1|ABC=1	ILMN_1714567	79026	0.44197	1.99618e-13	-0.31764	3.59928e-07	-0.330741	2.83927e-07	AHNAK	AHNAK nucleoprotein (AHNAK), transcript variant 1, mRNA.
30575882	Waist-to-hip ratio adjusted for BMI	11	62544922	rs2428549	AHNAK	0.802	|Promoter=1|PCHiC_Jung=1|ABC=1	ILMN_1792495	79026	0.312398	4.38116e-07	-0.334669	7.52186e-08	-0.206382	0.00165046	AHNAK	AHNAK nucleoprotein (AHNAK), transcript variant 1, mRNA.
31669095	Waist-to-hip ratio adjusted for BMI	11	62523404	rs77701059	AHNAK	0.981	|Exon=1|PCHiC_Jung=1	ILMN_1714567	79026	0.44197	1.99618e-13	-0.31764	3.59928e-07	-0.330741	2.83927e-07	AHNAK	AHNAK nucleoprotein (AHNAK), transcript variant 1, mRNA.
31669095	Waist-to-hip ratio adjusted for BMI	11	62523404	rs77701059	AHNAK	0.981	|Exon=1|PCHiC_Jung=1	ILMN_1792495	79026	0.312398	4.38116e-07	-0.334669	7.52186e-08	-0.206382	0.00165046	AHNAK	AHNAK nucleoprotein (AHNAK), transcript variant 1, mRNA.
30239722	Waist-to-hip ratio adjusted for BMI	11	17330136	rs757081	NUCB2	1	|Exon=1	ILMN_1655913	4925	0.197713	0.00164474	-0.320695	2.73697e-07	-0.244013	0.000186134	NUCB2	nucleobindin 2 (NUCB2), mRNA.
31669095	Waist-to-hip ratio adjusted for BMI	19	44908684	rs429358	APOE	1	|Exon=1|EpiMap=1|Roadmap=1	ILMN_1740938	348	-0.306663	7.26693e-07	0.189615	0.00282665	0.262964	5.39993e-05	APOE	apolipoprotein E (APOE), mRNA.
31669095	Waist-to-hip ratio adjusted for BMI	16	4373367	rs4786485	VASN	1	|GTeX_Finemapped=1|Roadmap=1|ABC=1	ILMN_1667295	114990	0.202262	0.00127388	-0.171316	0.00707615	-0.0418213	0.527993	VASN	vasorin (VASN), mRNA.
30575882	Waist-to-hip ratio adjusted for BMI	16	4365695	rs3747577	VASN	1	|ABC=1	ILMN_1667295	114990	0.202262	0.00127388	-0.171316	0.00707615	-0.0418213	0.527993	VASN	vasorin (VASN), mRNA.
30239722	Waist-to-hip ratio adjusted for BMI	5	128014857	rs3749748	SLC12A2	1	|eQTLGen_Finemapped=1	ILMN_1720996	6558	-0.127578	0.0434479	0.116788	0.0674485	0.147483	0.0253032	SLC12A2	solute carrier family 12 (sodium/potassium/chloride transporters), member 2 (SLC12A2), mRNA.
31669095	Waist-to-hip ratio adjusted for BMI	5	133108436	rs72801474	HSPA4	1	|GTeX_Finemapped=1	ILMN_1755134	3308	0.103276	0.102596	-0.221825	0.000456185	-0.120427	0.0682944	HSPA4	heat shock 70kDa protein 4 (HSPA4), mRNA.
30778226	Waist-to-hip ratio adjusted for BMI (additive genetic model)	16	4382028	rs3810818	VASN	1	|Exon=1|Roadmap=1|ABC=1	ILMN_1667295	114990	0.202262	0.00127388	-0.171316	0.00707615	-0.0418213	0.527993	VASN	vasorin (VASN), mRNA.
UKBB	biochemistry_Cholesterol	3	53290198	rs147254549	TKT	1	|Promoter=1|ABC=1	ILMN_1736597	7086	-0.281148	6.0807e-06	0.114254	0.0736559	0.0702927	0.288442	TKT	transketolase (Wernicke-Korsakoff syndrome) (TKT), mRNA.
UKBB	biochemistry_Cholesterol	19	45359148	rs2927466	APOE	1	|EpiMap=1	ILMN_1740938	348	-0.306663	7.26693e-07	0.189615	0.00282665	0.262964	5.39993e-05	APOE	apolipoprotein E (APOE), mRNA.
UKBB	biochemistry_Cholesterol	19	45411110	rs769452	APOE	1	|Exon=1	ILMN_1740938	348	-0.306663	7.26693e-07	0.189615	0.00282665	0.262964	5.39993e-05	APOE	apolipoprotein E (APOE), mRNA.
UKBB	biochemistry_Cholesterol	19	45411941	rs429358	APOE	1	|Exon=1|EpiMap=1	ILMN_1740938	348	-0.306663	7.26693e-07	0.189615	0.00282665	0.262964	5.39993e-05	APOE	apolipoprotein E (APOE), mRNA.
UKBB	biochemistry_Cholesterol	2	20371613	rs1107851	SDC1	1	|EpiMap=1	ILMN_1815308	6382	0.175556	0.00528482	-0.216537	0.000627107	-0.16619	0.0115948	SDC1	syndecan 1 (SDC1), transcript variant 1, mRNA.
UKBB	biochemistry_Cholesterol	2	20412197	rs3771244	SDC1	1	|ABC=1	ILMN_1815308	6382	0.175556	0.00528482	-0.216537	0.000627107	-0.16619	0.0115948	SDC1	syndecan 1 (SDC1), transcript variant 1, mRNA.
UKBB	biochemistry_Cholesterol	2	20412526	rs3771241	SDC1	1	|ABC=1	ILMN_1815308	6382	0.175556	0.00528482	-0.216537	0.000627107	-0.16619	0.0115948	SDC1	syndecan 1 (SDC1), transcript variant 1, mRNA.
UKBB	biochemistry_Cholesterol	2	20412735	rs3771239	SDC1	1	|EpiMap=1|ABC=1	ILMN_1815308	6382	0.175556	0.00528482	-0.216537	0.000627107	-0.16619	0.0115948	SDC1	syndecan 1 (SDC1), transcript variant 1, mRNA.
UKBB	biochemistry_Cholesterol	2	20413329	rs3732164	SDC1	1	|EpiMap=1|ABC=1	ILMN_1815308	6382	0.175556	0.00528482	-0.216537	0.000627107	-0.16619	0.0115948	SDC1	syndecan 1 (SDC1), transcript variant 1, mRNA.
UKBB	biochemistry_Cholesterol	2	20413454	rs3732163	SDC1	1	|EpiMap=1|ABC=1	ILMN_1815308	6382	0.175556	0.00528482	-0.216537	0.000627107	-0.16619	0.0115948	SDC1	syndecan 1 (SDC1), transcript variant 1, mRNA.
UKBB	biochemistry_Cholesterol	2	20414258	rs3771238	SDC1	1	|ABC=1	ILMN_1815308	6382	0.175556	0.00528482	-0.216537	0.000627107	-0.16619	0.0115948	SDC1	syndecan 1 (SDC1), transcript variant 1, mRNA.
UKBB	biochemistry_Cholesterol	2	20415158	rs3771236	SDC1	1	|EpiMap=1|ABC=1	ILMN_1815308	6382	0.175556	0.00528482	-0.216537	0.000627107	-0.16619	0.0115948	SDC1	syndecan 1 (SDC1), transcript variant 1, mRNA.
UKBB	biochemistry_Cholesterol	2	20424062	rs138986173	SDC1	1	|Promoter=1|GTeX_Finemapped=1|ABC=1|Cicero=1	ILMN_1815308	6382	0.175556	0.00528482	-0.216537	0.000627107	-0.16619	0.0115948	SDC1	syndecan 1 (SDC1), transcript variant 1, mRNA.
UKBB	biochemistry_Cholesterol	10	71993094	rs7077538	PPA1	1	|Exon=1|GTeX_Finemapped=1|ABC=1	ILMN_1805827	5464	0.139896	0.0266763	-0.210007	0.000919441	-0.142856	0.0303235	PPA1	pyrophosphatase (inorganic) 1 (PPA1), mRNA.
UKBB	biochemistry_Cholesterol	5	127418850	rs3812049	SLC12A2	1	|Promoter=1|ABC=1	ILMN_1720996	6558	-0.127578	0.0434479	0.116788	0.0674485	0.147483	0.0253032	SLC12A2	solute carrier family 12 (sodium/potassium/chloride transporters), member 2 (SLC12A2), mRNA.
UKBB	biochemistry_Cholesterol	7	131241085	rs7780021	PODXL	1	|Exon=1|eQTLGen_Finemapped=1|ABC=1	ILMN_2413158	5420	-0.121319	0.0549139	0.117074	0.0667737	0.153437	0.0199065	PODXL	podocalyxin-like (PODXL), transcript variant 1, mRNA.
UKBB	biochemistry_Cholesterol	7	131271575	rs774808712	PODXL	1	|ABC=1	ILMN_2413158	5420	-0.121319	0.0549139	0.117074	0.0667737	0.153437	0.0199065	PODXL	podocalyxin-like (PODXL), transcript variant 1, mRNA.
UKBB	biochemistry_Cholesterol	12	6479292	rs10849446	SCNN1A	0.817	|GTeX_Finemapped=1|ABC=1	ILMN_1713995	6337	0.398385	5.62439e-11	-0.371669	1.7809e-09	-0.198253	0.0025251	SCNN1A	sodium channel, nonvoltage-gated 1 alpha (SCNN1A), mRNA.
UKBB	biochemistry_Glucose	2	133272901	rs2315595	POTEKP	1	|GTeX_Finemapped=1	ILMN_1814998	440915	0.288811	3.2823e-06	-0.223614	0.000408943	-0.134964	0.0408499	POTEKP	actin-like protein (FKSG30), mRNA.
UKBB	biochemistry_Glucose	16	4422826	rs8058761	VASN	0.931	|Promoter=1|ABC=1	ILMN_1667295	114990	0.202262	0.00127388	-0.171316	0.00707615	-0.0418213	0.527993	VASN	vasorin (VASN), mRNA.
UKBB	biochemistry_Glucose	19	45414451	rs439401	APOE	0.658	|GTeX_Finemapped=1	ILMN_1740938	348	-0.306663	7.26693e-07	0.189615	0.00282665	0.262964	5.39993e-05	APOE	apolipoprotein E (APOE), mRNA.
UKBB	biochemistry_Glucose	7	31822252	rs13232836	AQP1	0.655	|EpiMap=1	ILMN_1776857	358	0.271452	1.29291e-05	-0.17281	0.0065858	-0.233638	0.000352144	AQP1	aquaporin 1 (Colton blood group) (AQP1), mRNA.
UKBB	biochemistry_Glucose	7	31822252	rs13232836	AQP1	0.655	|EpiMap=1	ILMN_1681103	358	0.214657	0.000617468	-0.108812	0.0885636	-0.157813	0.0166049	AQP1	aquaporin 1 (Colton blood group) (AQP1), mRNA.
UKBB	biochemistry_HbA1c	3	121839641	rs17281995	CD86	1	|Exon=1	ILMN_1714602	942	0.531342	0	-0.544762	0	-0.346577	6.82884e-08	CD86	CD86 molecule (CD86), transcript variant 2, mRNA.
UKBB	biochemistry_HbA1c	3	195809139	rs11915082	TFRC	1	|Promoter=1|ABC=1	ILMN_1674243	7037	0.4677	4.88498e-15	-0.418686	7.34879e-12	-0.26248	5.57987e-05	TFRC	transferrin receptor (p90, CD71) (TFRC), mRNA.
UKBB	biochemistry_HbA1c	3	195914097	rs9824251	TFRC	1	|eQTLGen_Finemapped=1|ABC=1	ILMN_1674243	7037	0.4677	4.88498e-15	-0.418686	7.34879e-12	-0.26248	5.57987e-05	TFRC	transferrin receptor (p90, CD71) (TFRC), mRNA.
UKBB	biochemistry_HbA1c	1	180166631	rs4652482	QSOX1	1	|Exon=1|EpiMap=1	ILMN_2411282	5768	0.464769	7.54952e-15	-0.432787	1.18949e-12	-0.293714	5.88608e-06	QSOX1	quiescin Q6 sulfhydryl oxidase 1 (QSOX1), transcript variant 2, mRNA.
UKBB	biochemistry_HbA1c	3	53290198	rs147254549	TKT	1	|Promoter=1|ABC=1	ILMN_1736597	7086	-0.281148	6.0807e-06	0.114254	0.0736559	0.0702927	0.288442	TKT	transketolase (Wernicke-Korsakoff syndrome) (TKT), mRNA.
UKBB	biochemistry_HbA1c	11	122932409	rs11218941	HSPA8	1	|Exon=1|ABC=1|Cicero=1	ILMN_1686367	3312	0.295549	1.88012e-06	-0.307016	9.11112e-07	-0.160355	0.0149153	HSPA8	heat shock 70kDa protein 8 (HSPA8), transcript variant 1, mRNA.
UKBB	biochemistry_HbA1c	19	45411941	rs429358	APOE	1	|Exon=1|EpiMap=1	ILMN_1740938	348	-0.306663	7.26693e-07	0.189615	0.00282665	0.262964	5.39993e-05	APOE	apolipoprotein E (APOE), mRNA.
UKBB	biochemistry_HbA1c	11	122932409	rs11218941	HSPA8	1	|Exon=1|ABC=1|Cicero=1	ILMN_2413084	3312	0.272009	1.23895e-05	-0.293174	2.89648e-06	-0.154384	0.0191473	HSPA8	heat shock 70kDa protein 8 (HSPA8), transcript variant 2, mRNA.
UKBB	biochemistry_HbA1c	7	30938167	rs1001733	AQP1	1	|GTeX_Finemapped=1|EpiMap=1|ABC=1	ILMN_1776857	358	0.271452	1.29291e-05	-0.17281	0.0065858	-0.233638	0.000352144	AQP1	aquaporin 1 (Colton blood group) (AQP1), mRNA.
UKBB	biochemistry_HbA1c	16	71845853	rs34531032	IST1	1	|GTeX_Finemapped=1	ILMN_1740351	9798	-0.233449	0.000190148	0.208395	0.00100877	0.145125	0.0277638	IST1	KIAA0174 (KIAA0174), mRNA.
UKBB	biochemistry_HbA1c	1	180166631	rs4652482	QSOX1	1	|Exon=1|EpiMap=1	ILMN_1758229	5768	0.242307	0.000105474	-0.210818	0.000877267	-0.0742336	0.262193	QSOX1	quiescin Q6 sulfhydryl oxidase 1 (QSOX1), transcript variant 1, mRNA.
UKBB	biochemistry_HbA1c	15	90408462	15:90408462_AAT_A	ANPEP	1	|EpiMap=1	ILMN_1763837	290	0.214705	0.000615661	-0.163948	0.0100013	-0.0568175	0.39107	ANPEP	alanyl (membrane) aminopeptidase (aminopeptidase N, aminopeptidase M, microsomal aminopeptidase, CD13, p150) (ANPEP), mRNA.
UKBB	biochemistry_HbA1c	10	15844400	rs12221218	ITGA8	1	|EpiMap=1	ILMN_1660306	8516	-0.19832	0.0015901	0.192401	0.00244004	0.179733	0.0062717	ITGA8	integrin, alpha 8 (ITGA8), mRNA.
UKBB	biochemistry_HbA1c	10	15845420	rs11253651	ITGA8	1	|GTeX_Finemapped=1|EpiMap=1	ILMN_1660306	8516	-0.19832	0.0015901	0.192401	0.00244004	0.179733	0.0062717	ITGA8	integrin, alpha 8 (ITGA8), mRNA.
UKBB	biochemistry_HbA1c	10	15861275	rs10795321	ITGA8	1	|GTeX_Finemapped=1	ILMN_1660306	8516	-0.19832	0.0015901	0.192401	0.00244004	0.179733	0.0062717	ITGA8	integrin, alpha 8 (ITGA8), mRNA.
UKBB	biochemistry_HbA1c	16	4440745	rs917306	VASN	1	|EpiMap=1	ILMN_1667295	114990	0.202262	0.00127388	-0.171316	0.00707615	-0.0418213	0.527993	VASN	vasorin (VASN), mRNA.
UKBB	biochemistry_HbA1c	7	30938167	rs1001733	AQP1	1	|GTeX_Finemapped=1|EpiMap=1|ABC=1	ILMN_1681103	358	0.214657	0.000617468	-0.108812	0.0885636	-0.157813	0.0166049	AQP1	aquaporin 1 (Colton blood group) (AQP1), mRNA.
UKBB	biochemistry_HbA1c	17	72440745	rs535088876	GPRC5C	1	|Promoter=1|EpiMap=1|ABC=1	ILMN_2352090	55890	-0.171287	0.00652264	0.0468834	0.464171	0.0952401	0.149926	GPRC5C	G protein-coupled receptor, family C, group 5, member C (GPRC5C), transcript variant 2, mRNA.
UKBB	biochemistry_HbA1c	17	72443710	rs2706526	GPRC5C	1	|GTeX_Finemapped=1|EpiMap=1	ILMN_2352090	55890	-0.171287	0.00652264	0.0468834	0.464171	0.0952401	0.149926	GPRC5C	G protein-coupled receptor, family C, group 5, member C (GPRC5C), transcript variant 2, mRNA.
UKBB	biochemistry_HbA1c	5	132384689	rs4574536	HSPA4	1	|GTeX_Finemapped=1|ABC=1	ILMN_1755134	3308	0.103276	0.102596	-0.221825	0.000456185	-0.120427	0.0682944	HSPA4	heat shock 70kDa protein 4 (HSPA4), mRNA.
UKBB	biochemistry_HbA1c	5	132388068	rs76836760	HSPA4	1	|Exon=1|ABC=1	ILMN_1755134	3308	0.103276	0.102596	-0.221825	0.000456185	-0.120427	0.0682944	HSPA4	heat shock 70kDa protein 4 (HSPA4), mRNA.
UKBB	biochemistry_HbA1c	5	132389687	rs12173082	HSPA4	1	|GTeX_Finemapped=1	ILMN_1755134	3308	0.103276	0.102596	-0.221825	0.000456185	-0.120427	0.0682944	HSPA4	heat shock 70kDa protein 4 (HSPA4), mRNA.
UKBB	biochemistry_HbA1c	5	132389746	rs74322503	HSPA4	1	|GTeX_Finemapped=1	ILMN_1755134	3308	0.103276	0.102596	-0.221825	0.000456185	-0.120427	0.0682944	HSPA4	heat shock 70kDa protein 4 (HSPA4), mRNA.
UKBB	biochemistry_HbA1c	5	132437531	rs1131809	HSPA4	1	|Exon=1|GTeX_Finemapped=1	ILMN_1755134	3308	0.103276	0.102596	-0.221825	0.000456185	-0.120427	0.0682944	HSPA4	heat shock 70kDa protein 4 (HSPA4), mRNA.
UKBB	biochemistry_HbA1c	1	155034632	rs45444697	ADAM15	0.993	|Promoter=1|GTeX_Finemapped=1|eQTLGen_Finemapped=1	ILMN_1799728	8751	-0.26722	1.78102e-05	0.34564	2.60603e-08	0.254421	9.54554e-05	ADAM15	PREDICTED: ADAM metallopeptidase domain 15 (metargidin) (ADAM15), mRNA.
UKBB	biochemistry_HbA1c	1	155034632	rs45444697	ADAM15	0.993	|Promoter=1|GTeX_Finemapped=1|eQTLGen_Finemapped=1	ILMN_1756920	8751	0.153694	0.0147966	-0.203235	0.00135111	-0.148277	0.0245176	ADAM15	ADAM metallopeptidase domain 15 (ADAM15), transcript variant 4, mRNA.
UKBB	biochemistry_HbA1c	1	155034632	rs45444697	ADAM15	0.993	|Promoter=1|GTeX_Finemapped=1|eQTLGen_Finemapped=1	ILMN_2384544	8751	0.19144	0.00231861	-0.181004	0.00439887	-0.116696	0.077366	ADAM15	ADAM metallopeptidase domain 15 (ADAM15), transcript variant 2, mRNA.
UKBB	biochemistry_HbA1c	1	155033918	rs41264285	ADAM15	0.982	|Exon=1|GTeX_Finemapped=1	ILMN_1799728	8751	-0.26722	1.78102e-05	0.34564	2.60603e-08	0.254421	9.54554e-05	ADAM15	PREDICTED: ADAM metallopeptidase domain 15 (metargidin) (ADAM15), mRNA.
UKBB	biochemistry_HbA1c	1	155033918	rs41264285	ADAM15	0.982	|Exon=1|GTeX_Finemapped=1	ILMN_1756920	8751	0.153694	0.0147966	-0.203235	0.00135111	-0.148277	0.0245176	ADAM15	ADAM metallopeptidase domain 15 (ADAM15), transcript variant 4, mRNA.
UKBB	biochemistry_HbA1c	1	155033918	rs41264285	ADAM15	0.982	|Exon=1|GTeX_Finemapped=1	ILMN_2384544	8751	0.19144	0.00231861	-0.181004	0.00439887	-0.116696	0.077366	ADAM15	ADAM metallopeptidase domain 15 (ADAM15), transcript variant 2, mRNA.
UKBB	biochemistry_HbA1c	17	72443287	rs6980	GPRC5C	0.982	|Exon=1|GTeX_Finemapped=1	ILMN_2352090	55890	-0.171287	0.00652264	0.0468834	0.464171	0.0952401	0.149926	GPRC5C	G protein-coupled receptor, family C, group 5, member C (GPRC5C), transcript variant 2, mRNA.
UKBB	biochemistry_HbA1c	17	72443192	rs2706527	GPRC5C	0.971	|Exon=1|GTeX_Finemapped=1|eQTLGen_Finemapped=1	ILMN_2352090	55890	-0.171287	0.00652264	0.0468834	0.464171	0.0952401	0.149926	GPRC5C	G protein-coupled receptor, family C, group 5, member C (GPRC5C), transcript variant 2, mRNA.
UKBB	biochemistry_HbA1c	3	195916053	rs9834661	TFRC	0.929	|eQTLGen_Finemapped=1	ILMN_1674243	7037	0.4677	4.88498e-15	-0.418686	7.34879e-12	-0.26248	5.57987e-05	TFRC	transferrin receptor (p90, CD71) (TFRC), mRNA.
UKBB	biochemistry_HbA1c	3	195921311	rs9325434	TFRC	0.865	|eQTLGen_Finemapped=1	ILMN_1674243	7037	0.4677	4.88498e-15	-0.418686	7.34879e-12	-0.26248	5.57987e-05	TFRC	transferrin receptor (p90, CD71) (TFRC), mRNA.
UKBB	biochemistry_HbA1c	1	155162067	rs4072037	MUC1	0.76	|Exon=1|EpiMap=1|ABC=1	ILMN_2371911	4582	0.303001	9.98356e-07	-0.297287	2.06685e-06	-0.0946687	0.152397	MUC1	mucin 1, cell surface associated (MUC1), transcript variant 5, mRNA.
UKBB	biochemistry_HbA1c	1	155162067	rs4072037	MUC1	0.76	|Exon=1|EpiMap=1|ABC=1	ILMN_1756992	4582	0.257102	3.74874e-05	-0.304167	1.16167e-06	-0.113431	0.0860812	MUC1	mucin 1, cell surface associated (MUC1), transcript variant 6, mRNA.
UKBB	biochemistry_HDLcholesterol	7	5567596	rs852424	ACTB	1	|Promoter=1|ABC=1|Cicero=1	ILMN_2152131	60	0.308835	6.00746e-07	-0.377116	9.84762e-10	-0.21505	0.00103036	ACTB	actin, beta (ACTB), mRNA.
UKBB	biochemistry_HDLcholesterol	7	5569827	rs2908424	ACTB	1	|Promoter=1|ABC=1	ILMN_2152131	60	0.308835	6.00746e-07	-0.377116	9.84762e-10	-0.21505	0.00103036	ACTB	actin, beta (ACTB), mRNA.
UKBB	biochemistry_HDLcholesterol	9	127999249	rs147263674	HSPA5	1	|Exon=1	ILMN_1773865	3309	0.36182	3.52731e-09	-0.345947	2.52829e-08	-0.223913	0.000624276	HSPA5	heat shock 70kDa protein 5 (glucose-regulated protein, 78kDa) (HSPA5), mRNA.
UKBB	biochemistry_HDLcholesterol	15	60847183	rs10431795	ANXA2	1	|Cicero=1	ILMN_2409167	302	0.233786	0.000186004	-0.365272	3.52209e-09	-0.308587	1.82937e-06	ANXA2	annexin A2 (ANXA2), transcript variant 1, mRNA.
UKBB	biochemistry_HDLcholesterol	7	5567596	rs852424	ACTB	1	|Promoter=1|ABC=1|Cicero=1	ILMN_2038777	60	0.231938	0.000209792	-0.314814	4.62438e-07	-0.18745	0.00433545	ACTB	actin, beta (ACTB), mRNA.
UKBB	biochemistry_HDLcholesterol	7	5569827	rs2908424	ACTB	1	|Promoter=1|ABC=1	ILMN_2038777	60	0.231938	0.000209792	-0.314814	4.62438e-07	-0.18745	0.00433545	ACTB	actin, beta (ACTB), mRNA.
UKBB	biochemistry_HDLcholesterol	15	60847183	rs10431795	ANXA2	1	|Cicero=1	ILMN_1755937	302	0.206617	0.000992347	-0.34448	2.92073e-08	-0.336353	1.72906e-07	ANXA2	annexin A2 (ANXA2), transcript variant 2, mRNA.
UKBB	biochemistry_HDLcholesterol	12	6477244	rs10774426	SCNN1A	1	|ABC=1	ILMN_1713995	6337	0.398385	5.62439e-11	-0.371669	1.7809e-09	-0.198253	0.0025251	SCNN1A	sodium channel, nonvoltage-gated 1 alpha (SCNN1A), mRNA.
UKBB	biochemistry_HDLcholesterol	12	6482786	rs2286600	SCNN1A	1	|GTeX_Finemapped=1|ABC=1	ILMN_1713995	6337	0.398385	5.62439e-11	-0.371669	1.7809e-09	-0.198253	0.0025251	SCNN1A	sodium channel, nonvoltage-gated 1 alpha (SCNN1A), mRNA.
UKBB	biochemistry_HDLcholesterol	19	45411941	rs429358	APOE	1	|Exon=1|EpiMap=1	ILMN_1740938	348	-0.306663	7.26693e-07	0.189615	0.00282665	0.262964	5.39993e-05	APOE	apolipoprotein E (APOE), mRNA.
UKBB	biochemistry_HDLcholesterol	19	45412079	rs7412	APOE	1	|Exon=1	ILMN_1740938	348	-0.306663	7.26693e-07	0.189615	0.00282665	0.262964	5.39993e-05	APOE	apolipoprotein E (APOE), mRNA.
UKBB	biochemistry_HDLcholesterol	7	5567596	rs852424	ACTB	1	|Promoter=1|ABC=1|Cicero=1	ILMN_1777296	60	0.148268	0.0187591	-0.249557	7.58985e-05	-0.0897054	0.175172	ACTB	actin, beta (ACTB), mRNA.
UKBB	biochemistry_HDLcholesterol	7	5569827	rs2908424	ACTB	1	|Promoter=1|ABC=1	ILMN_1777296	60	0.148268	0.0187591	-0.249557	7.58985e-05	-0.0897054	0.175172	ACTB	actin, beta (ACTB), mRNA.
UKBB	biochemistry_HDLcholesterol	2	20371613	rs1107851	SDC1	1	|EpiMap=1	ILMN_1815308	6382	0.175556	0.00528482	-0.216537	0.000627107	-0.16619	0.0115948	SDC1	syndecan 1 (SDC1), transcript variant 1, mRNA.
UKBB	biochemistry_HDLcholesterol	2	20372409	rs2090034	SDC1	1	|EpiMap=1	ILMN_1815308	6382	0.175556	0.00528482	-0.216537	0.000627107	-0.16619	0.0115948	SDC1	syndecan 1 (SDC1), transcript variant 1, mRNA.
UKBB	biochemistry_HDLcholesterol	2	20372547	rs2090032	SDC1	1	|EpiMap=1	ILMN_1815308	6382	0.175556	0.00528482	-0.216537	0.000627107	-0.16619	0.0115948	SDC1	syndecan 1 (SDC1), transcript variant 1, mRNA.
UKBB	biochemistry_HDLcholesterol	2	20408256	rs55690448	SDC1	1	|ABC=1	ILMN_1815308	6382	0.175556	0.00528482	-0.216537	0.000627107	-0.16619	0.0115948	SDC1	syndecan 1 (SDC1), transcript variant 1, mRNA.
UKBB	biochemistry_HDLcholesterol	2	20408360	rs55660995	SDC1	1	|EpiMap=1|ABC=1	ILMN_1815308	6382	0.175556	0.00528482	-0.216537	0.000627107	-0.16619	0.0115948	SDC1	syndecan 1 (SDC1), transcript variant 1, mRNA.
UKBB	biochemistry_HDLcholesterol	2	20412197	rs3771244	SDC1	1	|ABC=1	ILMN_1815308	6382	0.175556	0.00528482	-0.216537	0.000627107	-0.16619	0.0115948	SDC1	syndecan 1 (SDC1), transcript variant 1, mRNA.
UKBB	biochemistry_HDLcholesterol	2	20412526	rs3771241	SDC1	1	|ABC=1	ILMN_1815308	6382	0.175556	0.00528482	-0.216537	0.000627107	-0.16619	0.0115948	SDC1	syndecan 1 (SDC1), transcript variant 1, mRNA.
UKBB	biochemistry_HDLcholesterol	2	20412735	rs3771239	SDC1	1	|EpiMap=1|ABC=1	ILMN_1815308	6382	0.175556	0.00528482	-0.216537	0.000627107	-0.16619	0.0115948	SDC1	syndecan 1 (SDC1), transcript variant 1, mRNA.
UKBB	biochemistry_HDLcholesterol	2	20415158	rs3771236	SDC1	1	|EpiMap=1|ABC=1	ILMN_1815308	6382	0.175556	0.00528482	-0.216537	0.000627107	-0.16619	0.0115948	SDC1	syndecan 1 (SDC1), transcript variant 1, mRNA.
UKBB	biochemistry_HDLcholesterol	5	78421959	rs3733890	BHMT	1	|Exon=1	ILMN_1656638	635	0.244262	9.23329e-05	-0.201905	0.00145521	-0.12361	0.0612611	BHMT	betaine-homocysteine methyltransferase (BHMT), mRNA.
UKBB	biochemistry_HDLcholesterol	15	90356101	rs72754574	ANPEP	1	|ABC=1	ILMN_1763837	290	0.214705	0.000615661	-0.163948	0.0100013	-0.0568175	0.39107	ANPEP	alanyl (membrane) aminopeptidase (aminopeptidase N, aminopeptidase M, microsomal aminopeptidase, CD13, p150) (ANPEP), mRNA.
UKBB	biochemistry_HDLcholesterol	10	71992848	rs7089860	PPA1	1	|Promoter=1|GTeX_Finemapped=1|ABC=1	ILMN_1805827	5464	0.139896	0.0266763	-0.210007	0.000919441	-0.142856	0.0303235	PPA1	pyrophosphatase (inorganic) 1 (PPA1), mRNA.
UKBB	biochemistry_HDLcholesterol	10	71993094	rs7077538	PPA1	1	|Exon=1|GTeX_Finemapped=1|ABC=1	ILMN_1805827	5464	0.139896	0.0266763	-0.210007	0.000919441	-0.142856	0.0303235	PPA1	pyrophosphatase (inorganic) 1 (PPA1), mRNA.
UKBB	biochemistry_HDLcholesterol	5	127350549	rs3749748	SLC12A2	1	|eQTLGen_Finemapped=1	ILMN_1720996	6558	-0.127578	0.0434479	0.116788	0.0674485	0.147483	0.0253032	SLC12A2	solute carrier family 12 (sodium/potassium/chloride transporters), member 2 (SLC12A2), mRNA.
UKBB	biochemistry_HDLcholesterol	5	127448066	rs1560637	SLC12A2	1	|eQTLGen_Finemapped=1|ABC=1	ILMN_1720996	6558	-0.127578	0.0434479	0.116788	0.0674485	0.147483	0.0253032	SLC12A2	solute carrier family 12 (sodium/potassium/chloride transporters), member 2 (SLC12A2), mRNA.
UKBB	biochemistry_HDLcholesterol	5	132397351	rs55747751	HSPA4	1	|GTeX_Finemapped=1|eQTLGen_Finemapped=1	ILMN_1755134	3308	0.103276	0.102596	-0.221825	0.000456185	-0.120427	0.0682944	HSPA4	heat shock 70kDa protein 4 (HSPA4), mRNA.
UKBB	biochemistry_HDLcholesterol	5	132426851	5:132426851_GTT_G	HSPA4	1	|GTeX_Finemapped=1	ILMN_1755134	3308	0.103276	0.102596	-0.221825	0.000456185	-0.120427	0.0682944	HSPA4	heat shock 70kDa protein 4 (HSPA4), mRNA.
UKBB	biochemistry_HDLcholesterol	5	132444128	rs72801474	HSPA4	1	|GTeX_Finemapped=1	ILMN_1755134	3308	0.103276	0.102596	-0.221825	0.000456185	-0.120427	0.0682944	HSPA4	heat shock 70kDa protein 4 (HSPA4), mRNA.
UKBB	biochemistry_HDLcholesterol	7	131285283	rs75579468	PODXL	1	|EpiMap=1|ABC=1	ILMN_2413158	5420	-0.121319	0.0549139	0.117074	0.0667737	0.153437	0.0199065	PODXL	podocalyxin-like (PODXL), transcript variant 1, mRNA.
UKBB	biochemistry_HDLcholesterol	16	30079724	rs75721735	ALDOA	1	|Promoter=1	ILMN_1736700	226	-0.18012	0.0041985	-0.0318446	0.619157	0.0367769	0.578964	ALDOA	aldolase A, fructose-bisphosphate (ALDOA), transcript variant 2, mRNA.
UKBB	biochemistry_HDLcholesterol	9	128004024	rs391957	HSPA5	0.944	|Promoter=1|eQTLGen_Finemapped=1|ABC=1	ILMN_1773865	3309	0.36182	3.52731e-09	-0.345947	2.52829e-08	-0.223913	0.000624276	HSPA5	heat shock 70kDa protein 5 (glucose-regulated protein, 78kDa) (HSPA5), mRNA.
UKBB	biochemistry_HDLcholesterol	2	20424573	rs59231157	SDC1	0.932	|Exon=1|ABC=1|Cicero=1	ILMN_1815308	6382	0.175556	0.00528482	-0.216537	0.000627107	-0.16619	0.0115948	SDC1	syndecan 1 (SDC1), transcript variant 1, mRNA.
UKBB	biochemistry_HDLcholesterol	1	161494046	rs12125379	HSPA6	0.931	|Exon=1|ABC=1	ILMN_1806165	3310	0.471752	2.66453e-15	-0.405239	3.86195e-11	-0.276641	2.08157e-05	HSPA6	heat shock 70kDa protein 6 (HSP70B') (HSPA6), mRNA.
UKBB	biochemistry_HDLcholesterol	1	161494046	rs12125379	HSPA6	0.931	|Exon=1|ABC=1	ILMN_1658383	3310	0.37907	5.3363e-10	-0.311355	6.26246e-07	-0.151459	0.0215759	HSPA6	heat shock 70kDa protein 6 (HSP70B') (HSPA6), mRNA.
UKBB	biochemistry_HDLcholesterol	12	6481966	rs7958135	SCNN1A	0.895	|GTeX_Finemapped=1|ABC=1	ILMN_1713995	6337	0.398385	5.62439e-11	-0.371669	1.7809e-09	-0.198253	0.0025251	SCNN1A	sodium channel, nonvoltage-gated 1 alpha (SCNN1A), mRNA.
UKBB	biochemistry_LDLdirect	6	119510904	rs117089274	MAN1A1	1	|Exon=1	ILMN_1742187	4121	0.305359	8.1413e-07	-0.351034	1.52415e-08	-0.306862	2.1019e-06	MAN1A1	mannosidase, alpha, class 1A, member 1 (MAN1A1), mRNA.
UKBB	biochemistry_LDLdirect	19	45359148	rs2927466	APOE	1	|EpiMap=1	ILMN_1740938	348	-0.306663	7.26693e-07	0.189615	0.00282665	0.262964	5.39993e-05	APOE	apolipoprotein E (APOE), mRNA.
UKBB	biochemistry_LDLdirect	19	45411941	rs429358	APOE	1	|Exon=1|EpiMap=1	ILMN_1740938	348	-0.306663	7.26693e-07	0.189615	0.00282665	0.262964	5.39993e-05	APOE	apolipoprotein E (APOE), mRNA.
UKBB	biochemistry_LDLdirect	2	20371613	rs1107851	SDC1	1	|EpiMap=1	ILMN_1815308	6382	0.175556	0.00528482	-0.216537	0.000627107	-0.16619	0.0115948	SDC1	syndecan 1 (SDC1), transcript variant 1, mRNA.
UKBB	biochemistry_LDLdirect	2	20372409	rs2090034	SDC1	1	|EpiMap=1	ILMN_1815308	6382	0.175556	0.00528482	-0.216537	0.000627107	-0.16619	0.0115948	SDC1	syndecan 1 (SDC1), transcript variant 1, mRNA.
UKBB	biochemistry_LDLdirect	2	20372547	rs2090032	SDC1	1	|EpiMap=1	ILMN_1815308	6382	0.175556	0.00528482	-0.216537	0.000627107	-0.16619	0.0115948	SDC1	syndecan 1 (SDC1), transcript variant 1, mRNA.
UKBB	biochemistry_Triglycerides	1	161494322	rs9427403	HSPA6	1	|Exon=1|GTeX_Finemapped=1|ABC=1	ILMN_1806165	3310	0.471752	2.66453e-15	-0.405239	3.86195e-11	-0.276641	2.08157e-05	HSPA6	heat shock 70kDa protein 6 (HSP70B') (HSPA6), mRNA.
UKBB	biochemistry_Triglycerides	7	5567112	rs7612	ACTB	1	|Exon=1	ILMN_2152131	60	0.308835	6.00746e-07	-0.377116	9.84762e-10	-0.21505	0.00103036	ACTB	actin, beta (ACTB), mRNA.
UKBB	biochemistry_Triglycerides	7	5567596	rs852424	ACTB	1	|Promoter=1|ABC=1|Cicero=1	ILMN_2152131	60	0.308835	6.00746e-07	-0.377116	9.84762e-10	-0.21505	0.00103036	ACTB	actin, beta (ACTB), mRNA.
UKBB	biochemistry_Triglycerides	7	5569827	rs2908424	ACTB	1	|Promoter=1|ABC=1	ILMN_2152131	60	0.308835	6.00746e-07	-0.377116	9.84762e-10	-0.21505	0.00103036	ACTB	actin, beta (ACTB), mRNA.
UKBB	biochemistry_Triglycerides	1	161494322	rs9427403	HSPA6	1	|Exon=1|GTeX_Finemapped=1|ABC=1	ILMN_1658383	3310	0.37907	5.3363e-10	-0.311355	6.26246e-07	-0.151459	0.0215759	HSPA6	heat shock 70kDa protein 6 (HSP70B') (HSPA6), mRNA.
UKBB	biochemistry_Triglycerides	7	5567112	rs7612	ACTB	1	|Exon=1	ILMN_2038777	60	0.231938	0.000209792	-0.314814	4.62438e-07	-0.18745	0.00433545	ACTB	actin, beta (ACTB), mRNA.
UKBB	biochemistry_Triglycerides	7	5567596	rs852424	ACTB	1	|Promoter=1|ABC=1|Cicero=1	ILMN_2038777	60	0.231938	0.000209792	-0.314814	4.62438e-07	-0.18745	0.00433545	ACTB	actin, beta (ACTB), mRNA.
UKBB	biochemistry_Triglycerides	7	5569827	rs2908424	ACTB	1	|Promoter=1|ABC=1	ILMN_2038777	60	0.231938	0.000209792	-0.314814	4.62438e-07	-0.18745	0.00433545	ACTB	actin, beta (ACTB), mRNA.
UKBB	biochemistry_Triglycerides	3	53289634	rs62256006	TKT	1	|Promoter=1|GTeX_Finemapped=1|eQTLGen_Finemapped=1|ABC=1	ILMN_1736597	7086	-0.281148	6.0807e-06	0.114254	0.0736559	0.0702927	0.288442	TKT	transketolase (Wernicke-Korsakoff syndrome) (TKT), mRNA.
UKBB	biochemistry_Triglycerides	19	45412079	rs7412	APOE	1	|Exon=1	ILMN_1740938	348	-0.306663	7.26693e-07	0.189615	0.00282665	0.262964	5.39993e-05	APOE	apolipoprotein E (APOE), mRNA.
UKBB	biochemistry_Triglycerides	7	5567112	rs7612	ACTB	1	|Exon=1	ILMN_1777296	60	0.148268	0.0187591	-0.249557	7.58985e-05	-0.0897054	0.175172	ACTB	actin, beta (ACTB), mRNA.
UKBB	biochemistry_Triglycerides	7	5567596	rs852424	ACTB	1	|Promoter=1|ABC=1|Cicero=1	ILMN_1777296	60	0.148268	0.0187591	-0.249557	7.58985e-05	-0.0897054	0.175172	ACTB	actin, beta (ACTB), mRNA.
UKBB	biochemistry_Triglycerides	7	5569827	rs2908424	ACTB	1	|Promoter=1|ABC=1	ILMN_1777296	60	0.148268	0.0187591	-0.249557	7.58985e-05	-0.0897054	0.175172	ACTB	actin, beta (ACTB), mRNA.
UKBB	biochemistry_Triglycerides	17	57696773	rs3803863	CLTC	1	|Promoter=1|ABC=1	ILMN_1756779	1213	0.167604	0.00779227	-0.28445	5.82373e-06	-0.200282	0.00227423	CLTC	clathrin, heavy chain (Hc) (CLTC), mRNA.
UKBB	biochemistry_Triglycerides	2	20367135	rs11895352	SDC1	1	|EpiMap=1|ABC=1	ILMN_1815308	6382	0.175556	0.00528482	-0.216537	0.000627107	-0.16619	0.0115948	SDC1	syndecan 1 (SDC1), transcript variant 1, mRNA.
UKBB	biochemistry_Triglycerides	2	20369562	rs870526	SDC1	1	|EpiMap=1	ILMN_1815308	6382	0.175556	0.00528482	-0.216537	0.000627107	-0.16619	0.0115948	SDC1	syndecan 1 (SDC1), transcript variant 1, mRNA.
UKBB	biochemistry_Triglycerides	2	20369701	rs870527	SDC1	1	|EpiMap=1	ILMN_1815308	6382	0.175556	0.00528482	-0.216537	0.000627107	-0.16619	0.0115948	SDC1	syndecan 1 (SDC1), transcript variant 1, mRNA.
UKBB	biochemistry_Triglycerides	2	20371167	rs907868	SDC1	1	|EpiMap=1	ILMN_1815308	6382	0.175556	0.00528482	-0.216537	0.000627107	-0.16619	0.0115948	SDC1	syndecan 1 (SDC1), transcript variant 1, mRNA.
UKBB	biochemistry_Triglycerides	2	20371301	rs907867	SDC1	1	|EpiMap=1	ILMN_1815308	6382	0.175556	0.00528482	-0.216537	0.000627107	-0.16619	0.0115948	SDC1	syndecan 1 (SDC1), transcript variant 1, mRNA.
UKBB	biochemistry_Triglycerides	2	20371613	rs1107851	SDC1	1	|EpiMap=1	ILMN_1815308	6382	0.175556	0.00528482	-0.216537	0.000627107	-0.16619	0.0115948	SDC1	syndecan 1 (SDC1), transcript variant 1, mRNA.
UKBB	biochemistry_Triglycerides	2	20372547	rs2090032	SDC1	1	|EpiMap=1	ILMN_1815308	6382	0.175556	0.00528482	-0.216537	0.000627107	-0.16619	0.0115948	SDC1	syndecan 1 (SDC1), transcript variant 1, mRNA.
UKBB	biochemistry_Triglycerides	1	171613756	rs235875	MYOC	1	|EpiMap=1	ILMN_2052335	4653	-0.170849	0.0066631	0.106359	0.0960328	0.135307	0.040336	MYOC	myocilin, trabecular meshwork inducible glucocorticoid response (MYOC), mRNA.
UKBB	biochemistry_Triglycerides	16	4436037	rs1291696	VASN	1	|EpiMap=1|ABC=1	ILMN_1667295	114990	0.202262	0.00127388	-0.171316	0.00707615	-0.0418213	0.527993	VASN	vasorin (VASN), mRNA.
UKBB	biochemistry_Triglycerides	1	171613756	rs235875	MYOC	1	|EpiMap=1	ILMN_2052331	4653	-0.148841	0.018301	0.098785	0.12228	0.121771	0.0652477	MYOC	myocilin, trabecular meshwork inducible glucocorticoid response (MYOC), mRNA.
UKBB	biochemistry_Triglycerides	5	132384689	rs4574536	HSPA4	1	|GTeX_Finemapped=1|ABC=1	ILMN_1755134	3308	0.103276	0.102596	-0.221825	0.000456185	-0.120427	0.0682944	HSPA4	heat shock 70kDa protein 4 (HSPA4), mRNA.
UKBB	biochemistry_Triglycerides	5	132444128	rs72801474	HSPA4	1	|GTeX_Finemapped=1	ILMN_1755134	3308	0.103276	0.102596	-0.221825	0.000456185	-0.120427	0.0682944	HSPA4	heat shock 70kDa protein 4 (HSPA4), mRNA.
UKBB	biochemistry_Triglycerides	16	30079450	rs11867026	ALDOA	1	|Promoter=1	ILMN_1736700	226	-0.18012	0.0041985	-0.0318446	0.619157	0.0367769	0.578964	ALDOA	aldolase A, fructose-bisphosphate (ALDOA), transcript variant 2, mRNA.
UKBB	biochemistry_Triglycerides	17	72436366	rs562223559	GPRC5C	0.972	|Exon=1	ILMN_2352090	55890	-0.171287	0.00652264	0.0468834	0.464171	0.0952401	0.149926	GPRC5C	G protein-coupled receptor, family C, group 5, member C (GPRC5C), transcript variant 2, mRNA.
UKBB	body_BMIz	13	98129710	rs1467693	RAP2A	1	|GTeX_Finemapped=1	ILMN_1677404	5911	0.526967	0	-0.434105	9.98979e-13	-0.327579	3.73827e-07	RAP2A	RAP2A, member of RAS oncogene family (RAP2A), mRNA.
UKBB	body_BMIz	13	98222913	rs9584603	RAP2A	1	|EpiMap=1	ILMN_1677404	5911	0.526967	0	-0.434105	9.98979e-13	-0.327579	3.73827e-07	RAP2A	RAP2A, member of RAS oncogene family (RAP2A), mRNA.
UKBB	body_BMIz	6	119522553	rs9481891	MAN1A1	1	|GTeX_Finemapped=1	ILMN_1742187	4121	0.305359	8.1413e-07	-0.351034	1.52415e-08	-0.306862	2.1019e-06	MAN1A1	mannosidase, alpha, class 1A, member 1 (MAN1A1), mRNA.
UKBB	body_BMIz	6	119523281	rs6899434	MAN1A1	1	|GTeX_Finemapped=1	ILMN_1742187	4121	0.305359	8.1413e-07	-0.351034	1.52415e-08	-0.306862	2.1019e-06	MAN1A1	mannosidase, alpha, class 1A, member 1 (MAN1A1), mRNA.
UKBB	body_BMIz	7	100781413	rs7241	SERPINE1	1	|Exon=1|EpiMap=1|ABC=1	ILMN_1744381	5054	0.338072	3.97682e-08	-0.323941	2.03926e-07	-0.207959	0.001517	SERPINE1	serpin peptidase inhibitor, clade E (nexin, plasminogen activator inhibitor type 1), member 1 (SERPINE1), mRNA.
UKBB	body_BMIz	11	122021170	rs689025	HSPA8	1	|EpiMap=1	ILMN_1686367	3312	0.295549	1.88012e-06	-0.307016	9.11112e-07	-0.160355	0.0149153	HSPA8	heat shock 70kDa protein 8 (HSPA8), transcript variant 1, mRNA.
UKBB	body_BMIz	11	122021170	rs689025	HSPA8	1	|EpiMap=1	ILMN_2413084	3312	0.272009	1.23895e-05	-0.293174	2.89648e-06	-0.154384	0.0191473	HSPA8	heat shock 70kDa protein 8 (HSPA8), transcript variant 2, mRNA.
UKBB	body_BMIz	1	203498514	rs56401607	PRELP	1	|EpiMap=1	ILMN_2395156	5549	0.110513	0.0805542	-0.237645	0.000168314	-0.0940695	0.155021	PRELP	proline/arginine-rich end leucine-rich repeat protein (PRELP), transcript variant 2, mRNA.
UKBB	body_BMIz	1	203498514	rs56401607	PRELP	1	|EpiMap=1	ILMN_1707380	5549	0.0993251	0.1165	-0.228289	0.000306048	-0.111811	0.0906896	PRELP	proline/arginine-rich end leucine-rich repeat protein (PRELP), transcript variant 1, mRNA.
UKBB	body_BMIz	20	50348606	rs77176176	ATP9A	1	|Promoter=1|ABC=1	ILMN_2089073	10079	0.171184	0.00655553	-0.170835	0.00724057	-0.209557	0.00139185	ATP9A	ATPase, class II, type 9A (ATP9A), mRNA.
UKBB	body_BMIz	20	50348625	rs76077833	ATP9A	1	|Promoter=1|ABC=1	ILMN_2089073	10079	0.171184	0.00655553	-0.170835	0.00724057	-0.209557	0.00139185	ATP9A	ATPase, class II, type 9A (ATP9A), mRNA.
UKBB	body_BMIz	7	131243224	rs138482922	PODXL	1	|Promoter=1|ABC=1	ILMN_2413158	5420	-0.121319	0.0549139	0.117074	0.0667737	0.153437	0.0199065	PODXL	podocalyxin-like (PODXL), transcript variant 1, mRNA.
UKBB	body_BMIz	7	131248078	rs888602	PODXL	1	|GTeX_Finemapped=1	ILMN_2413158	5420	-0.121319	0.0549139	0.117074	0.0667737	0.153437	0.0199065	PODXL	podocalyxin-like (PODXL), transcript variant 1, mRNA.
UKBB	body_BMIz	14	95554142	rs1057035	DICER1	1	|Exon=1|GTeX_Finemapped=1	ILMN_2349831	23405	0.136789	0.0302719	-0.11329	0.0761388	-0.176086	0.00743136	DICER1	Dicer1, Dcr-1 homolog (Drosophila) (DICER1), transcript variant 2, mRNA.
UKBB	body_BMIz	3	53258782	rs115779209	TKT	0.981	|Exon=1	ILMN_1736597	7086	-0.281148	6.0807e-06	0.114254	0.0736559	0.0702927	0.288442	TKT	transketolase (Wernicke-Korsakoff syndrome) (TKT), mRNA.
UKBB	body_BMIz	1	17314942	rs9435662	ATP13A2	0.936	|Exon=1|eQTLGen_Finemapped=1	ILMN_1704164	23400	0.0808227	0.201896	-0.192276	0.00245629	-0.0929415	0.160054	ATP13A2	ATPase type 13A2 (ATP13A2), mRNA.
UKBB	body_BMIz	1	17313654	rs761421	ATP13A2	0.923	|Exon=1|EpiMap=1	ILMN_1704164	23400	0.0808227	0.201896	-0.192276	0.00245629	-0.0929415	0.160054	ATP13A2	ATPase type 13A2 (ATP13A2), mRNA.
UKBB	body_BMIz	7	100803245	rs141729983	SERPINE1	0.655	|EpiMap=1	ILMN_1744381	5054	0.338072	3.97682e-08	-0.323941	2.03926e-07	-0.207959	0.001517	SERPINE1	serpin peptidase inhibitor, clade E (nexin, plasminogen activator inhibitor type 1), member 1 (SERPINE1), mRNA.
UKBB	body_BMIz	7	100803265	rs78558757	SERPINE1	0.655	|EpiMap=1	ILMN_1744381	5054	0.338072	3.97682e-08	-0.323941	2.03926e-07	-0.207959	0.001517	SERPINE1	serpin peptidase inhibitor, clade E (nexin, plasminogen activator inhibitor type 1), member 1 (SERPINE1), mRNA.
UKBB	body_WHRadjBMIz	11	62188855	rs2509970	AHNAK	1	|GTeX_Finemapped=1	ILMN_1714567	79026	0.44197	1.99618e-13	-0.31764	3.59928e-07	-0.330741	2.83927e-07	AHNAK	AHNAK nucleoprotein (AHNAK), transcript variant 1, mRNA.
UKBB	body_WHRadjBMIz	11	62193981	rs2513059	AHNAK	1	|ABC=1	ILMN_1714567	79026	0.44197	1.99618e-13	-0.31764	3.59928e-07	-0.330741	2.83927e-07	AHNAK	AHNAK nucleoprotein (AHNAK), transcript variant 1, mRNA.
UKBB	body_WHRadjBMIz	15	52635394	rs61731219	MYO5A	1	|Exon=1	ILMN_1698225	4644	0.400134	4.554e-11	-0.33804	5.45502e-08	-0.284492	1.17642e-05	MYO5A	myosin VA (heavy chain 12, myoxin) (MYO5A), mRNA.
UKBB	body_WHRadjBMIz	15	52783909	rs186173595	MYO5A	1	|EpiMap=1|ABC=1	ILMN_1698225	4644	0.400134	4.554e-11	-0.33804	5.45502e-08	-0.284492	1.17642e-05	MYO5A	myosin VA (heavy chain 12, myoxin) (MYO5A), mRNA.
UKBB	body_WHRadjBMIz	7	5568288	rs79074016	ACTB	1	|Exon=1|ABC=1|Cicero=1	ILMN_2152131	60	0.308835	6.00746e-07	-0.377116	9.84762e-10	-0.21505	0.00103036	ACTB	actin, beta (ACTB), mRNA.
UKBB	body_WHRadjBMIz	7	5568288	rs79074016	ACTB	1	|Exon=1|ABC=1|Cicero=1	ILMN_2038777	60	0.231938	0.000209792	-0.314814	4.62438e-07	-0.18745	0.00433545	ACTB	actin, beta (ACTB), mRNA.
UKBB	body_WHRadjBMIz	11	62188855	rs2509970	AHNAK	1	|GTeX_Finemapped=1	ILMN_1792495	79026	0.312398	4.38116e-07	-0.334669	7.52186e-08	-0.206382	0.00165046	AHNAK	AHNAK nucleoprotein (AHNAK), transcript variant 1, mRNA.
UKBB	body_WHRadjBMIz	11	62193981	rs2513059	AHNAK	1	|ABC=1	ILMN_1792495	79026	0.312398	4.38116e-07	-0.334669	7.52186e-08	-0.206382	0.00165046	AHNAK	AHNAK nucleoprotein (AHNAK), transcript variant 1, mRNA.
UKBB	body_WHRadjBMIz	3	53267709	rs114030816	TKT	1	|ABC=1	ILMN_1736597	7086	-0.281148	6.0807e-06	0.114254	0.0736559	0.0702927	0.288442	TKT	transketolase (Wernicke-Korsakoff syndrome) (TKT), mRNA.
UKBB	body_WHRadjBMIz	11	122021170	rs689025	HSPA8	1	|EpiMap=1	ILMN_1686367	3312	0.295549	1.88012e-06	-0.307016	9.11112e-07	-0.160355	0.0149153	HSPA8	heat shock 70kDa protein 8 (HSPA8), transcript variant 1, mRNA.
UKBB	body_WHRadjBMIz	19	45411941	rs429358	APOE	1	|Exon=1|EpiMap=1	ILMN_1740938	348	-0.306663	7.26693e-07	0.189615	0.00282665	0.262964	5.39993e-05	APOE	apolipoprotein E (APOE), mRNA.
UKBB	body_WHRadjBMIz	11	122021170	rs689025	HSPA8	1	|EpiMap=1	ILMN_2413084	3312	0.272009	1.23895e-05	-0.293174	2.89648e-06	-0.154384	0.0191473	HSPA8	heat shock 70kDa protein 8 (HSPA8), transcript variant 2, mRNA.
UKBB	body_WHRadjBMIz	7	30926496	rs66519137	AQP1	1	|EpiMap=1|ABC=1	ILMN_1776857	358	0.271452	1.29291e-05	-0.17281	0.0065858	-0.233638	0.000352144	AQP1	aquaporin 1 (Colton blood group) (AQP1), mRNA.
UKBB	body_WHRadjBMIz	7	30935748	rs1465216	AQP1	1	|GTeX_Finemapped=1|EpiMap=1|ABC=1	ILMN_1776857	358	0.271452	1.29291e-05	-0.17281	0.0065858	-0.233638	0.000352144	AQP1	aquaporin 1 (Colton blood group) (AQP1), mRNA.
UKBB	body_WHRadjBMIz	7	30935900	rs12112380	AQP1	1	|EpiMap=1|ABC=1	ILMN_1776857	358	0.271452	1.29291e-05	-0.17281	0.0065858	-0.233638	0.000352144	AQP1	aquaporin 1 (Colton blood group) (AQP1), mRNA.
UKBB	body_WHRadjBMIz	7	30938167	rs1001733	AQP1	1	|GTeX_Finemapped=1|EpiMap=1|ABC=1	ILMN_1776857	358	0.271452	1.29291e-05	-0.17281	0.0065858	-0.233638	0.000352144	AQP1	aquaporin 1 (Colton blood group) (AQP1), mRNA.
UKBB	body_WHRadjBMIz	7	30961790	rs28362731	AQP1	1	|Exon=1|EpiMap=1	ILMN_1776857	358	0.271452	1.29291e-05	-0.17281	0.0065858	-0.233638	0.000352144	AQP1	aquaporin 1 (Colton blood group) (AQP1), mRNA.
UKBB	body_WHRadjBMIz	7	5568288	rs79074016	ACTB	1	|Exon=1|ABC=1|Cicero=1	ILMN_1777296	60	0.148268	0.0187591	-0.249557	7.58985e-05	-0.0897054	0.175172	ACTB	actin, beta (ACTB), mRNA.
UKBB	body_WHRadjBMIz	2	181834018	rs4602187	ITGA4	1	|GTeX_Finemapped=1	ILMN_1747052	3676	0.202542	0.00125375	-0.125673	0.048967	-0.0857308	0.195157	ITGA4	integrin, alpha 4 (antigen CD49D, alpha 4 subunit of VLA-4 receptor) (ITGA4), mRNA.
UKBB	body_WHRadjBMIz	2	20372270	rs2090035	SDC1	1	|EpiMap=1	ILMN_1815308	6382	0.175556	0.00528482	-0.216537	0.000627107	-0.16619	0.0115948	SDC1	syndecan 1 (SDC1), transcript variant 1, mRNA.
UKBB	body_WHRadjBMIz	5	78407974	rs112465831	BHMT	1	|Promoter=1	ILMN_1656638	635	0.244262	9.23329e-05	-0.201905	0.00145521	-0.12361	0.0612611	BHMT	betaine-homocysteine methyltransferase (BHMT), mRNA.
UKBB	body_WHRadjBMIz	3	33887008	rs112754416	PDCD6IP	1	|Exon=1	ILMN_1693259	10015	-0.206762	0.000984036	0.251956	6.43373e-05	0.192998	0.00329609	PDCD6IP	programmed cell death 6 interacting protein (PDCD6IP), mRNA.
UKBB	body_WHRadjBMIz	3	33905566	rs1127732	PDCD6IP	1	|Exon=1|GTeX_Finemapped=1	ILMN_1693259	10015	-0.206762	0.000984036	0.251956	6.43373e-05	0.192998	0.00329609	PDCD6IP	programmed cell death 6 interacting protein (PDCD6IP), mRNA.
UKBB	body_WHRadjBMIz	16	4420817	rs35193388	VASN	1	|GTeX_Finemapped=1|ABC=1	ILMN_1667295	114990	0.202262	0.00127388	-0.171316	0.00707615	-0.0418213	0.527993	VASN	vasorin (VASN), mRNA.
UKBB	body_WHRadjBMIz	5	127350549	rs3749748	SLC12A2	1	|eQTLGen_Finemapped=1	ILMN_1720996	6558	-0.127578	0.0434479	0.116788	0.0674485	0.147483	0.0253032	SLC12A2	solute carrier family 12 (sodium/potassium/chloride transporters), member 2 (SLC12A2), mRNA.
UKBB	body_WHRadjBMIz	5	127388844	rs2250127	SLC12A2	1	|eQTLGen_Finemapped=1|ABC=1	ILMN_1720996	6558	-0.127578	0.0434479	0.116788	0.0674485	0.147483	0.0253032	SLC12A2	solute carrier family 12 (sodium/potassium/chloride transporters), member 2 (SLC12A2), mRNA.
UKBB	body_WHRadjBMIz	7	30926496	rs66519137	AQP1	1	|EpiMap=1|ABC=1	ILMN_1681103	358	0.214657	0.000617468	-0.108812	0.0885636	-0.157813	0.0166049	AQP1	aquaporin 1 (Colton blood group) (AQP1), mRNA.
UKBB	body_WHRadjBMIz	7	30935748	rs1465216	AQP1	1	|GTeX_Finemapped=1|EpiMap=1|ABC=1	ILMN_1681103	358	0.214657	0.000617468	-0.108812	0.0885636	-0.157813	0.0166049	AQP1	aquaporin 1 (Colton blood group) (AQP1), mRNA.
UKBB	body_WHRadjBMIz	7	30935900	rs12112380	AQP1	1	|EpiMap=1|ABC=1	ILMN_1681103	358	0.214657	0.000617468	-0.108812	0.0885636	-0.157813	0.0166049	AQP1	aquaporin 1 (Colton blood group) (AQP1), mRNA.
UKBB	body_WHRadjBMIz	7	30938167	rs1001733	AQP1	1	|GTeX_Finemapped=1|EpiMap=1|ABC=1	ILMN_1681103	358	0.214657	0.000617468	-0.108812	0.0885636	-0.157813	0.0166049	AQP1	aquaporin 1 (Colton blood group) (AQP1), mRNA.
UKBB	body_WHRadjBMIz	7	30961790	rs28362731	AQP1	1	|Exon=1|EpiMap=1	ILMN_1681103	358	0.214657	0.000617468	-0.108812	0.0885636	-0.157813	0.0166049	AQP1	aquaporin 1 (Colton blood group) (AQP1), mRNA.
UKBB	body_WHRadjBMIz	5	132397351	rs55747751	HSPA4	1	|GTeX_Finemapped=1|eQTLGen_Finemapped=1	ILMN_1755134	3308	0.103276	0.102596	-0.221825	0.000456185	-0.120427	0.0682944	HSPA4	heat shock 70kDa protein 4 (HSPA4), mRNA.
UKBB	body_WHRadjBMIz	5	132444128	rs72801474	HSPA4	1	|GTeX_Finemapped=1	ILMN_1755134	3308	0.103276	0.102596	-0.221825	0.000456185	-0.120427	0.0682944	HSPA4	heat shock 70kDa protein 4 (HSPA4), mRNA.
UKBB	body_WHRadjBMIz	3	53269028	rs150551962	TKT	0.981	|Exon=1	ILMN_1736597	7086	-0.281148	6.0807e-06	0.114254	0.0736559	0.0702927	0.288442	TKT	transketolase (Wernicke-Korsakoff syndrome) (TKT), mRNA.
UKBB	body_WHRadjBMIz	16	4422305	rs886860	VASN	0.931	|Promoter=1|ABC=1	ILMN_1667295	114990	0.202262	0.00127388	-0.171316	0.00707615	-0.0418213	0.527993	VASN	vasorin (VASN), mRNA.
UKBB	body_WHRadjBMIz	16	4422607	rs7200336	VASN	0.931	|Promoter=1|ABC=1	ILMN_1667295	114990	0.202262	0.00127388	-0.171316	0.00707615	-0.0418213	0.527993	VASN	vasorin (VASN), mRNA.
UKBB	body_WHRadjBMIz	11	62194412	rs2509957	AHNAK	0.896	|eQTLGen_Finemapped=1	ILMN_1714567	79026	0.44197	1.99618e-13	-0.31764	3.59928e-07	-0.330741	2.83927e-07	AHNAK	AHNAK nucleoprotein (AHNAK), transcript variant 1, mRNA.
UKBB	body_WHRadjBMIz	11	62194412	rs2509957	AHNAK	0.896	|eQTLGen_Finemapped=1	ILMN_1792495	79026	0.312398	4.38116e-07	-0.334669	7.52186e-08	-0.206382	0.00165046	AHNAK	AHNAK nucleoprotein (AHNAK), transcript variant 1, mRNA.
UKBB	body_WHRadjBMIz	11	62312394	rs2428549	AHNAK	0.802	|Promoter=1|ABC=1	ILMN_1714567	79026	0.44197	1.99618e-13	-0.31764	3.59928e-07	-0.330741	2.83927e-07	AHNAK	AHNAK nucleoprotein (AHNAK), transcript variant 1, mRNA.
UKBB	body_WHRadjBMIz	11	62312786	rs2509967	AHNAK	0.802	|Promoter=1|ABC=1	ILMN_1714567	79026	0.44197	1.99618e-13	-0.31764	3.59928e-07	-0.330741	2.83927e-07	AHNAK	AHNAK nucleoprotein (AHNAK), transcript variant 1, mRNA.
UKBB	body_WHRadjBMIz	11	62312394	rs2428549	AHNAK	0.802	|Promoter=1|ABC=1	ILMN_1792495	79026	0.312398	4.38116e-07	-0.334669	7.52186e-08	-0.206382	0.00165046	AHNAK	AHNAK nucleoprotein (AHNAK), transcript variant 1, mRNA.
UKBB	body_WHRadjBMIz	11	62312786	rs2509967	AHNAK	0.802	|Promoter=1|ABC=1	ILMN_1792495	79026	0.312398	4.38116e-07	-0.334669	7.52186e-08	-0.206382	0.00165046	AHNAK	AHNAK nucleoprotein (AHNAK), transcript variant 1, mRNA.
UKBB	body_WHRadjBMIz	11	62193537	rs1985927	AHNAK	0.798	|GTeX_Finemapped=1	ILMN_1714567	79026	0.44197	1.99618e-13	-0.31764	3.59928e-07	-0.330741	2.83927e-07	AHNAK	AHNAK nucleoprotein (AHNAK), transcript variant 1, mRNA.
UKBB	body_WHRadjBMIz	11	62193537	rs1985927	AHNAK	0.798	|GTeX_Finemapped=1	ILMN_1792495	79026	0.312398	4.38116e-07	-0.334669	7.52186e-08	-0.206382	0.00165046	AHNAK	AHNAK nucleoprotein (AHNAK), transcript variant 1, mRNA.
UKBB	body_WHRadjBMIz	12	6457062	rs2228576	SCNN1A	0.776	|Exon=1	ILMN_1713995	6337	0.398385	5.62439e-11	-0.371669	1.7809e-09	-0.198253	0.0025251	SCNN1A	sodium channel, nonvoltage-gated 1 alpha (SCNN1A), mRNA.
UKBB	body_WHRadjBMIz	5	77924176	rs10055187	BHMT	0.655	|EpiMap=1	ILMN_1656638	635	0.244262	9.23329e-05	-0.201905	0.00145521	-0.12361	0.0612611	BHMT	betaine-homocysteine methyltransferase (BHMT), mRNA.
UKBB	bp_DIASTOLICadjMEDz	11	17351683	rs757081	NUCB2	1	|Exon=1	ILMN_1655913	4925	0.197713	0.00164474	-0.320695	2.73697e-07	-0.244013	0.000186134	NUCB2	nucleobindin 2 (NUCB2), mRNA.
UKBB	bp_DIASTOLICadjMEDz	3	152878944	3:152878944_CA_C	RAP2B	1	|ABC=1	ILMN_2229839	5912	0.281559	5.8855e-06	-0.203687	0.00131734	-0.0526598	0.426715	RAP2B	RAP2B, member of RAS oncogene family (RAP2B), mRNA.
UKBB	bp_DIASTOLICadjMEDz	2	20411528	rs72783299	SDC1	1	|EpiMap=1|ABC=1	ILMN_1815308	6382	0.175556	0.00528482	-0.216537	0.000627107	-0.16619	0.0115948	SDC1	syndecan 1 (SDC1), transcript variant 1, mRNA.
UKBB	bp_DIASTOLICadjMEDz	2	20412561	rs55881199	SDC1	1	|ABC=1	ILMN_1815308	6382	0.175556	0.00528482	-0.216537	0.000627107	-0.16619	0.0115948	SDC1	syndecan 1 (SDC1), transcript variant 1, mRNA.
UKBB	bp_DIASTOLICadjMEDz	2	20424655	rs11544860	SDC1	1	|Exon=1|ABC=1|Cicero=1	ILMN_1815308	6382	0.175556	0.00528482	-0.216537	0.000627107	-0.16619	0.0115948	SDC1	syndecan 1 (SDC1), transcript variant 1, mRNA.
UKBB	bp_DIASTOLICadjMEDz	3	33840114	rs1141054	PDCD6IP	1	|Exon=1|GTeX_Finemapped=1|ABC=1	ILMN_1693259	10015	-0.206762	0.000984036	0.251956	6.43373e-05	0.192998	0.00329609	PDCD6IP	programmed cell death 6 interacting protein (PDCD6IP), mRNA.
UKBB	bp_DIASTOLICadjMEDz	3	33887008	rs112754416	PDCD6IP	1	|Exon=1	ILMN_1693259	10015	-0.206762	0.000984036	0.251956	6.43373e-05	0.192998	0.00329609	PDCD6IP	programmed cell death 6 interacting protein (PDCD6IP), mRNA.
UKBB	bp_DIASTOLICadjMEDz	3	33895391	rs3183982	PDCD6IP	1	|Exon=1	ILMN_1693259	10015	-0.206762	0.000984036	0.251956	6.43373e-05	0.192998	0.00329609	PDCD6IP	programmed cell death 6 interacting protein (PDCD6IP), mRNA.
UKBB	bp_DIASTOLICadjMEDz	5	127249194	rs9327455	SLC12A2	1	|GTeX_Finemapped=1	ILMN_1720996	6558	-0.127578	0.0434479	0.116788	0.0674485	0.147483	0.0253032	SLC12A2	solute carrier family 12 (sodium/potassium/chloride transporters), member 2 (SLC12A2), mRNA.
UKBB	bp_DIASTOLICadjMEDz	5	127350549	rs3749748	SLC12A2	1	|eQTLGen_Finemapped=1	ILMN_1720996	6558	-0.127578	0.0434479	0.116788	0.0674485	0.147483	0.0253032	SLC12A2	solute carrier family 12 (sodium/potassium/chloride transporters), member 2 (SLC12A2), mRNA.
UKBB	bp_DIASTOLICadjMEDz	5	132384689	rs4574536	HSPA4	1	|GTeX_Finemapped=1|ABC=1	ILMN_1755134	3308	0.103276	0.102596	-0.221825	0.000456185	-0.120427	0.0682944	HSPA4	heat shock 70kDa protein 4 (HSPA4), mRNA.
UKBB	bp_DIASTOLICadjMEDz	5	132392393	rs6596097	HSPA4	1	|GTeX_Finemapped=1	ILMN_1755134	3308	0.103276	0.102596	-0.221825	0.000456185	-0.120427	0.0682944	HSPA4	heat shock 70kDa protein 4 (HSPA4), mRNA.
UKBB	bp_DIASTOLICadjMEDz	5	132408967	rs61755724	HSPA4	1	|Exon=1	ILMN_1755134	3308	0.103276	0.102596	-0.221825	0.000456185	-0.120427	0.0682944	HSPA4	heat shock 70kDa protein 4 (HSPA4), mRNA.
UKBB	bp_DIASTOLICadjMEDz	5	132437531	rs1131809	HSPA4	1	|Exon=1|GTeX_Finemapped=1	ILMN_1755134	3308	0.103276	0.102596	-0.221825	0.000456185	-0.120427	0.0682944	HSPA4	heat shock 70kDa protein 4 (HSPA4), mRNA.
UKBB	bp_DIASTOLICadjMEDz	3	107765249	rs3206652	CD47	1	|Exon=1	ILMN_1771333	961	0.161809	0.010238	-0.0817416	0.201364	0.0587279	0.375313	CD47	CD47 molecule (CD47), transcript variant 2, mRNA.
UKBB	bp_DIASTOLICadjMEDz	7	131183218	rs3847112	PODXL	1	|EpiMap=1	ILMN_2413158	5420	-0.121319	0.0549139	0.117074	0.0667737	0.153437	0.0199065	PODXL	podocalyxin-like (PODXL), transcript variant 1, mRNA.
UKBB	bp_DIASTOLICadjMEDz	7	131185995	rs1733860	PODXL	1	|Exon=1	ILMN_2413158	5420	-0.121319	0.0549139	0.117074	0.0667737	0.153437	0.0199065	PODXL	podocalyxin-like (PODXL), transcript variant 1, mRNA.
UKBB	bp_DIASTOLICadjMEDz	7	131321010	rs75672964	PODXL	1	|EpiMap=1	ILMN_2413158	5420	-0.121319	0.0549139	0.117074	0.0667737	0.153437	0.0199065	PODXL	podocalyxin-like (PODXL), transcript variant 1, mRNA.
UKBB	bp_DIASTOLICadjMEDz	7	131323710	rs75511781	PODXL	1	|EpiMap=1|ABC=1	ILMN_2413158	5420	-0.121319	0.0549139	0.117074	0.0667737	0.153437	0.0199065	PODXL	podocalyxin-like (PODXL), transcript variant 1, mRNA.
UKBB	bp_DIASTOLICadjMEDz	7	131338978	rs772365861	PODXL	1	|EpiMap=1	ILMN_2413158	5420	-0.121319	0.0549139	0.117074	0.0667737	0.153437	0.0199065	PODXL	podocalyxin-like (PODXL), transcript variant 1, mRNA.
UKBB	bp_DIASTOLICadjMEDz	17	72439067	rs74627195	GPRC5C	0.99	|Promoter=1|EpiMap=1|ABC=1	ILMN_2352090	55890	-0.171287	0.00652264	0.0468834	0.464171	0.0952401	0.149926	GPRC5C	G protein-coupled receptor, family C, group 5, member C (GPRC5C), transcript variant 2, mRNA.
UKBB	bp_DIASTOLICadjMEDz	1	155033918	rs41264285	ADAM15	0.982	|Exon=1|GTeX_Finemapped=1	ILMN_1799728	8751	-0.26722	1.78102e-05	0.34564	2.60603e-08	0.254421	9.54554e-05	ADAM15	PREDICTED: ADAM metallopeptidase domain 15 (metargidin) (ADAM15), mRNA.
UKBB	bp_DIASTOLICadjMEDz	1	155033918	rs41264285	ADAM15	0.982	|Exon=1|GTeX_Finemapped=1	ILMN_1756920	8751	0.153694	0.0147966	-0.203235	0.00135111	-0.148277	0.0245176	ADAM15	ADAM metallopeptidase domain 15 (ADAM15), transcript variant 4, mRNA.
UKBB	bp_DIASTOLICadjMEDz	1	155033918	rs41264285	ADAM15	0.982	|Exon=1|GTeX_Finemapped=1	ILMN_2384544	8751	0.19144	0.00231861	-0.181004	0.00439887	-0.116696	0.077366	ADAM15	ADAM metallopeptidase domain 15 (ADAM15), transcript variant 2, mRNA.
UKBB	bp_DIASTOLICadjMEDz	17	59222069	rs983817	CA4	0.655	|EpiMap=1	ILMN_1695157	762	-0.343501	2.3263e-08	0.301464	1.45935e-06	0.176712	0.00721963	CA4	carbonic anhydrase IV (CA4), mRNA.
UKBB	bp_DIASTOLICadjMEDz	2	198365788	rs2305560	HSPD1	0.502	|Promoter=1|ABC=1	ILMN_1766713	3329	-0.432093	7.70051e-13	0.375395	1.18895e-09	0.309612	1.68378e-06	HSPD1	heat shock 60kDa protein 1 (chaperonin) (HSPD1), nuclear gene encoding mitochondrial protein, transcript variant 1, mRNA.
UKBB	bp_DIASTOLICadjMEDz	2	198365788	rs2305560	HSPD1	0.502	|Promoter=1|ABC=1	ILMN_2381397	3329	-0.380825	4.37548e-10	0.328439	1.34868e-07	0.248276	0.000142081	HSPD1	heat shock 60kDa protein 1 (chaperonin) (HSPD1), nuclear gene encoding mitochondrial protein, transcript variant 1, mRNA.
UKBB	bp_DIASTOLICadjMEDz	2	198365788	rs2305560	HSPD1	0.502	|Promoter=1|ABC=1	ILMN_1784367	3329	-0.145709	0.0209276	0.193763	0.00226907	0.170169	0.00972194	HSPD1	heat shock 60kDa protein 1 (chaperonin) (HSPD1), nuclear gene encoding mitochondrial protein, transcript variant 1, mRNA.
UKBB	bp_SYSTOLICadjMEDz	15	52810461	15:52810461_CAAA_C	MYO5A	1	|EpiMap=1	ILMN_1698225	4644	0.400134	4.554e-11	-0.33804	5.45502e-08	-0.284492	1.17642e-05	MYO5A	myosin VA (heavy chain 12, myoxin) (MYO5A), mRNA.
UKBB	bp_SYSTOLICadjMEDz	11	17351683	rs757081	NUCB2	1	|Exon=1	ILMN_1655913	4925	0.197713	0.00164474	-0.320695	2.73697e-07	-0.244013	0.000186134	NUCB2	nucleobindin 2 (NUCB2), mRNA.
UKBB	bp_SYSTOLICadjMEDz	11	17352477	11:17352477_TACA_T	NUCB2	1	|Exon=1	ILMN_1655913	4925	0.197713	0.00164474	-0.320695	2.73697e-07	-0.244013	0.000186134	NUCB2	nucleobindin 2 (NUCB2), mRNA.
UKBB	bp_SYSTOLICadjMEDz	19	45412079	rs7412	APOE	1	|Exon=1	ILMN_1740938	348	-0.306663	7.26693e-07	0.189615	0.00282665	0.262964	5.39993e-05	APOE	apolipoprotein E (APOE), mRNA.
UKBB	bp_SYSTOLICadjMEDz	1	171615206	rs12035960	MYOC	1	|GTeX_Finemapped=1|EpiMap=1|ABC=1	ILMN_2052335	4653	-0.170849	0.0066631	0.106359	0.0960328	0.135307	0.040336	MYOC	myocilin, trabecular meshwork inducible glucocorticoid response (MYOC), mRNA.
UKBB	bp_SYSTOLICadjMEDz	16	4419854	rs75345455	VASN	1	|ABC=1	ILMN_1667295	114990	0.202262	0.00127388	-0.171316	0.00707615	-0.0418213	0.527993	VASN	vasorin (VASN), mRNA.
UKBB	bp_SYSTOLICadjMEDz	5	127350549	rs3749748	SLC12A2	1	|eQTLGen_Finemapped=1	ILMN_1720996	6558	-0.127578	0.0434479	0.116788	0.0674485	0.147483	0.0253032	SLC12A2	solute carrier family 12 (sodium/potassium/chloride transporters), member 2 (SLC12A2), mRNA.
UKBB	bp_SYSTOLICadjMEDz	1	171615206	rs12035960	MYOC	1	|GTeX_Finemapped=1|EpiMap=1|ABC=1	ILMN_2052331	4653	-0.148841	0.018301	0.098785	0.12228	0.121771	0.0652477	MYOC	myocilin, trabecular meshwork inducible glucocorticoid response (MYOC), mRNA.
UKBB	bp_SYSTOLICadjMEDz	17	72390610	rs7222995	GPRC5C	1	|EpiMap=1|ABC=1	ILMN_2352090	55890	-0.171287	0.00652264	0.0468834	0.464171	0.0952401	0.149926	GPRC5C	G protein-coupled receptor, family C, group 5, member C (GPRC5C), transcript variant 2, mRNA.
UKBB	bp_SYSTOLICadjMEDz	5	132384689	rs4574536	HSPA4	1	|GTeX_Finemapped=1|ABC=1	ILMN_1755134	3308	0.103276	0.102596	-0.221825	0.000456185	-0.120427	0.0682944	HSPA4	heat shock 70kDa protein 4 (HSPA4), mRNA.
UKBB	bp_SYSTOLICadjMEDz	5	132391701	rs10043154	HSPA4	1	|GTeX_Finemapped=1	ILMN_1755134	3308	0.103276	0.102596	-0.221825	0.000456185	-0.120427	0.0682944	HSPA4	heat shock 70kDa protein 4 (HSPA4), mRNA.
UKBB	bp_SYSTOLICadjMEDz	5	132437531	rs1131809	HSPA4	1	|Exon=1|GTeX_Finemapped=1	ILMN_1755134	3308	0.103276	0.102596	-0.221825	0.000456185	-0.120427	0.0682944	HSPA4	heat shock 70kDa protein 4 (HSPA4), mRNA.
UKBB	bp_SYSTOLICadjMEDz	5	132440285	rs14355	HSPA4	1	|Exon=1	ILMN_1755134	3308	0.103276	0.102596	-0.221825	0.000456185	-0.120427	0.0682944	HSPA4	heat shock 70kDa protein 4 (HSPA4), mRNA.
UKBB	bp_SYSTOLICadjMEDz	7	131185995	rs1733860	PODXL	1	|Exon=1	ILMN_2413158	5420	-0.121319	0.0549139	0.117074	0.0667737	0.153437	0.0199065	PODXL	podocalyxin-like (PODXL), transcript variant 1, mRNA.
UKBB	bp_SYSTOLICadjMEDz	7	131304662	rs746014	PODXL	1	|EpiMap=1|ABC=1	ILMN_2413158	5420	-0.121319	0.0549139	0.117074	0.0667737	0.153437	0.0199065	PODXL	podocalyxin-like (PODXL), transcript variant 1, mRNA.
UKBB	bp_SYSTOLICadjMEDz	7	131308497	rs79986720	PODXL	1	|ABC=1	ILMN_2413158	5420	-0.121319	0.0549139	0.117074	0.0667737	0.153437	0.0199065	PODXL	podocalyxin-like (PODXL), transcript variant 1, mRNA.
UKBB	bp_SYSTOLICadjMEDz	7	131321010	rs75672964	PODXL	1	|EpiMap=1	ILMN_2413158	5420	-0.121319	0.0549139	0.117074	0.0667737	0.153437	0.0199065	PODXL	podocalyxin-like (PODXL), transcript variant 1, mRNA.
UKBB	bp_SYSTOLICadjMEDz	7	131323710	rs75511781	PODXL	1	|EpiMap=1|ABC=1	ILMN_2413158	5420	-0.121319	0.0549139	0.117074	0.0667737	0.153437	0.0199065	PODXL	podocalyxin-like (PODXL), transcript variant 1, mRNA.
UKBB	bp_SYSTOLICadjMEDz	7	131338978	rs772365861	PODXL	1	|EpiMap=1	ILMN_2413158	5420	-0.121319	0.0549139	0.117074	0.0667737	0.153437	0.0199065	PODXL	podocalyxin-like (PODXL), transcript variant 1, mRNA.
UKBB	bp_SYSTOLICadjMEDz	5	132442190	rs56076449	HSPA4	0.962	|eQTLGen_Finemapped=1	ILMN_1755134	3308	0.103276	0.102596	-0.221825	0.000456185	-0.120427	0.0682944	HSPA4	heat shock 70kDa protein 4 (HSPA4), mRNA.
UKBB	bp_SYSTOLICadjMEDz	7	130973495	rs35680304	PODXL	0.882	|GTeX_Finemapped=1	ILMN_2413158	5420	-0.121319	0.0549139	0.117074	0.0667737	0.153437	0.0199065	PODXL	podocalyxin-like (PODXL), transcript variant 1, mRNA.
UKBB	bp_SYSTOLICadjMEDz	17	79426416	rs4969272	ACTG1	0.655	|EpiMap=1	ILMN_2053178	71	0.333011	6.49531e-08	-0.327983	1.40685e-07	-0.195637	0.00288565	ACTG1	actin, gamma 1 (ACTG1), mRNA.
UKBB	bp_SYSTOLICadjMEDz	17	79426416	rs4969272	ACTG1	0.655	|EpiMap=1	ILMN_1704961	71	0.113241	0.0733131	-0.172562	0.00666513	-0.0189452	0.775047	ACTG1	actin, gamma 1 (ACTG1), mRNA.
UKBB	disease_CARDIOVASCULAR	1	180143064	rs3767183	QSOX1	1	|EpiMap=1|ABC=1	ILMN_2411282	5768	0.464769	7.54952e-15	-0.432787	1.18949e-12	-0.293714	5.88608e-06	QSOX1	quiescin Q6 sulfhydryl oxidase 1 (QSOX1), transcript variant 2, mRNA.
UKBB	disease_CARDIOVASCULAR	15	60690089	rs12904657	ANXA2	1	|Exon=1|eQTLGen_Finemapped=1|ABC=1|Cicero=1	ILMN_2409167	302	0.233786	0.000186004	-0.365272	3.52209e-09	-0.308587	1.82937e-06	ANXA2	annexin A2 (ANXA2), transcript variant 1, mRNA.
UKBB	disease_CARDIOVASCULAR	15	60690089	rs12904657	ANXA2	1	|Exon=1|eQTLGen_Finemapped=1|ABC=1|Cicero=1	ILMN_1755937	302	0.206617	0.000992347	-0.34448	2.92073e-08	-0.336353	1.72906e-07	ANXA2	annexin A2 (ANXA2), transcript variant 2, mRNA.
UKBB	disease_CARDIOVASCULAR	19	45411941	rs429358	APOE	1	|Exon=1|EpiMap=1	ILMN_1740938	348	-0.306663	7.26693e-07	0.189615	0.00282665	0.262964	5.39993e-05	APOE	apolipoprotein E (APOE), mRNA.
UKBB	disease_CARDIOVASCULAR	19	45412079	rs7412	APOE	1	|Exon=1	ILMN_1740938	348	-0.306663	7.26693e-07	0.189615	0.00282665	0.262964	5.39993e-05	APOE	apolipoprotein E (APOE), mRNA.
UKBB	disease_CARDIOVASCULAR	1	180143064	rs3767183	QSOX1	1	|EpiMap=1|ABC=1	ILMN_1758229	5768	0.242307	0.000105474	-0.210818	0.000877267	-0.0742336	0.262193	QSOX1	quiescin Q6 sulfhydryl oxidase 1 (QSOX1), transcript variant 1, mRNA.
UKBB	disease_CARDIOVASCULAR	2	20400430	rs2348478	SDC1	1	|EpiMap=1	ILMN_1815308	6382	0.175556	0.00528482	-0.216537	0.000627107	-0.16619	0.0115948	SDC1	syndecan 1 (SDC1), transcript variant 1, mRNA.
UKBB	disease_CARDIOVASCULAR	5	127350549	rs3749748	SLC12A2	1	|eQTLGen_Finemapped=1	ILMN_1720996	6558	-0.127578	0.0434479	0.116788	0.0674485	0.147483	0.0253032	SLC12A2	solute carrier family 12 (sodium/potassium/chloride transporters), member 2 (SLC12A2), mRNA.
UKBB	disease_CARDIOVASCULAR	5	132426851	5:132426851_GTT_G	HSPA4	1	|GTeX_Finemapped=1	ILMN_1755134	3308	0.103276	0.102596	-0.221825	0.000456185	-0.120427	0.0682944	HSPA4	heat shock 70kDa protein 4 (HSPA4), mRNA.
UKBB	disease_CARDIOVASCULAR	5	132444128	rs72801474	HSPA4	1	|GTeX_Finemapped=1	ILMN_1755134	3308	0.103276	0.102596	-0.221825	0.000456185	-0.120427	0.0682944	HSPA4	heat shock 70kDa protein 4 (HSPA4), mRNA.
UKBB	disease_CARDIOVASCULAR	7	131239009	rs1643257	PODXL	1	|GTeX_Finemapped=1|eQTLGen_Finemapped=1|ABC=1	ILMN_2413158	5420	-0.121319	0.0549139	0.117074	0.0667737	0.153437	0.0199065	PODXL	podocalyxin-like (PODXL), transcript variant 1, mRNA.
UKBB	disease_CARDIOVASCULAR	7	131240373	rs1615131	PODXL	1	|Promoter=1|GTeX_Finemapped=1|eQTLGen_Finemapped=1|ABC=1	ILMN_2413158	5420	-0.121319	0.0549139	0.117074	0.0667737	0.153437	0.0199065	PODXL	podocalyxin-like (PODXL), transcript variant 1, mRNA.
UKBB	disease_CARDIOVASCULAR	7	131241085	rs7780021	PODXL	1	|Exon=1|eQTLGen_Finemapped=1|ABC=1	ILMN_2413158	5420	-0.121319	0.0549139	0.117074	0.0667737	0.153437	0.0199065	PODXL	podocalyxin-like (PODXL), transcript variant 1, mRNA.
UKBB	disease_CARDIOVASCULAR	7	131304822	rs147915706	PODXL	1	|EpiMap=1|ABC=1	ILMN_2413158	5420	-0.121319	0.0549139	0.117074	0.0667737	0.153437	0.0199065	PODXL	podocalyxin-like (PODXL), transcript variant 1, mRNA.
UKBB	disease_CARDIOVASCULAR	7	131323710	rs75511781	PODXL	1	|EpiMap=1|ABC=1	ILMN_2413158	5420	-0.121319	0.0549139	0.117074	0.0667737	0.153437	0.0199065	PODXL	podocalyxin-like (PODXL), transcript variant 1, mRNA.
UKBB	disease_CARDIOVASCULAR	17	72439067	rs74627195	GPRC5C	0.99	|Promoter=1|EpiMap=1|ABC=1	ILMN_2352090	55890	-0.171287	0.00652264	0.0468834	0.464171	0.0952401	0.149926	GPRC5C	G protein-coupled receptor, family C, group 5, member C (GPRC5C), transcript variant 2, mRNA.
UKBB	disease_CARDIOVASCULAR	7	130973495	rs35680304	PODXL	0.882	|GTeX_Finemapped=1	ILMN_2413158	5420	-0.121319	0.0549139	0.117074	0.0667737	0.153437	0.0199065	PODXL	podocalyxin-like (PODXL), transcript variant 1, mRNA.
UKBB	disease_DIABETES_ANY_DIAGNOSED	4	88967919	rs75762896	PKD2	1	|Exon=1	ILMN_2052891	5311	0.499684	0	-0.401926	5.74774e-11	-0.313405	1.23544e-06	PKD2	polycystic kidney disease 2 (autosomal dominant) (PKD2), mRNA.
UKBB	disease_DIABETES_ANY_DIAGNOSED	4	88967919	rs75762896	PKD2	1	|Exon=1	ILMN_1807300	5311	0.282528	5.44917e-06	-0.318614	3.29938e-07	-0.279725	1.66702e-05	PKD2	polycystic kidney disease 2 (autosomal dominant) (PKD2), mRNA.
UKBB	disease_DIABETES_ANY_DIAGNOSED	19	45410002	rs769449	APOE	1	|Promoter=1|ABC=1	ILMN_1740938	348	-0.306663	7.26693e-07	0.189615	0.00282665	0.262964	5.39993e-05	APOE	apolipoprotein E (APOE), mRNA.
UKBB	disease_DIABETES_ANY_DIAGNOSED	20	50575751	rs2143549	ATP9A	1	|ABC=1	ILMN_2089073	10079	0.171184	0.00655553	-0.170835	0.00724057	-0.209557	0.00139185	ATP9A	ATPase, class II, type 9A (ATP9A), mRNA.
UKBB	disease_DIABETES_ANY_DIAGNOSED	15	90379843	rs8030857	ANPEP	1	|eQTLGen_Finemapped=1|ABC=1|Cicero=1	ILMN_1763837	290	0.214705	0.000615661	-0.163948	0.0100013	-0.0568175	0.39107	ANPEP	alanyl (membrane) aminopeptidase (aminopeptidase N, aminopeptidase M, microsomal aminopeptidase, CD13, p150) (ANPEP), mRNA.
UKBB	disease_DIABETES_ANY_DIAGNOSED	10	15761241	rs9333259	ITGA8	1	|Promoter=1|ABC=1	ILMN_1660306	8516	-0.19832	0.0015901	0.192401	0.00244004	0.179733	0.0062717	ITGA8	integrin, alpha 8 (ITGA8), mRNA.
UKBB	disease_DIABETES_ANY_DIAGNOSED	5	127350549	rs3749748	SLC12A2	1	|eQTLGen_Finemapped=1	ILMN_1720996	6558	-0.127578	0.0434479	0.116788	0.0674485	0.147483	0.0253032	SLC12A2	solute carrier family 12 (sodium/potassium/chloride transporters), member 2 (SLC12A2), mRNA.
UKBB	disease_DIABETES_ANY_DIAGNOSED	7	131266224	rs17823976	PODXL	1	|EpiMap=1|ABC=1	ILMN_2413158	5420	-0.121319	0.0549139	0.117074	0.0667737	0.153437	0.0199065	PODXL	podocalyxin-like (PODXL), transcript variant 1, mRNA.
UKBB	disease_DIABETES_ANY_DIAGNOSED	13	31705952	rs6561999	HSPH1	0.655	|EpiMap=1	ILMN_1712888	10808	0.27652	8.7469e-06	-0.257538	4.35253e-05	-0.145376	0.0274931	HSPH1	heat shock 105kDa/110kDa protein 1 (HSPH1), mRNA.
UKBB	disease_HYPERTENSION_DIAGNOSED	15	60690089	rs12904657	ANXA2	1	|Exon=1|eQTLGen_Finemapped=1|ABC=1|Cicero=1	ILMN_2409167	302	0.233786	0.000186004	-0.365272	3.52209e-09	-0.308587	1.82937e-06	ANXA2	annexin A2 (ANXA2), transcript variant 1, mRNA.
UKBB	disease_HYPERTENSION_DIAGNOSED	15	60690089	rs12904657	ANXA2	1	|Exon=1|eQTLGen_Finemapped=1|ABC=1|Cicero=1	ILMN_1755937	302	0.206617	0.000992347	-0.34448	2.92073e-08	-0.336353	1.72906e-07	ANXA2	annexin A2 (ANXA2), transcript variant 2, mRNA.
UKBB	disease_HYPERTENSION_DIAGNOSED	3	153038621	rs4269064	RAP2B	1	|GTeX_Finemapped=1	ILMN_2229839	5912	0.281559	5.8855e-06	-0.203687	0.00131734	-0.0526598	0.426715	RAP2B	RAP2B, member of RAS oncogene family (RAP2B), mRNA.
UKBB	disease_HYPERTENSION_DIAGNOSED	11	122021170	rs689025	HSPA8	1	|EpiMap=1	ILMN_1686367	3312	0.295549	1.88012e-06	-0.307016	9.11112e-07	-0.160355	0.0149153	HSPA8	heat shock 70kDa protein 8 (HSPA8), transcript variant 1, mRNA.
UKBB	disease_HYPERTENSION_DIAGNOSED	11	122021210	rs484934	HSPA8	1	|EpiMap=1	ILMN_1686367	3312	0.295549	1.88012e-06	-0.307016	9.11112e-07	-0.160355	0.0149153	HSPA8	heat shock 70kDa protein 8 (HSPA8), transcript variant 1, mRNA.
UKBB	disease_HYPERTENSION_DIAGNOSED	11	122933132	rs2236658	HSPA8	1	|Promoter=1|ABC=1	ILMN_1686367	3312	0.295549	1.88012e-06	-0.307016	9.11112e-07	-0.160355	0.0149153	HSPA8	heat shock 70kDa protein 8 (HSPA8), transcript variant 1, mRNA.
UKBB	disease_HYPERTENSION_DIAGNOSED	19	45412079	rs7412	APOE	1	|Exon=1	ILMN_1740938	348	-0.306663	7.26693e-07	0.189615	0.00282665	0.262964	5.39993e-05	APOE	apolipoprotein E (APOE), mRNA.
UKBB	disease_HYPERTENSION_DIAGNOSED	11	122021170	rs689025	HSPA8	1	|EpiMap=1	ILMN_2413084	3312	0.272009	1.23895e-05	-0.293174	2.89648e-06	-0.154384	0.0191473	HSPA8	heat shock 70kDa protein 8 (HSPA8), transcript variant 2, mRNA.
UKBB	disease_HYPERTENSION_DIAGNOSED	11	122021210	rs484934	HSPA8	1	|EpiMap=1	ILMN_2413084	3312	0.272009	1.23895e-05	-0.293174	2.89648e-06	-0.154384	0.0191473	HSPA8	heat shock 70kDa protein 8 (HSPA8), transcript variant 2, mRNA.
UKBB	disease_HYPERTENSION_DIAGNOSED	11	122933132	rs2236658	HSPA8	1	|Promoter=1|ABC=1	ILMN_2413084	3312	0.272009	1.23895e-05	-0.293174	2.89648e-06	-0.154384	0.0191473	HSPA8	heat shock 70kDa protein 8 (HSPA8), transcript variant 2, mRNA.
UKBB	disease_HYPERTENSION_DIAGNOSED	7	30935739	rs12666237	AQP1	1	|EpiMap=1|ABC=1	ILMN_1776857	358	0.271452	1.29291e-05	-0.17281	0.0065858	-0.233638	0.000352144	AQP1	aquaporin 1 (Colton blood group) (AQP1), mRNA.
UKBB	disease_HYPERTENSION_DIAGNOSED	7	30935748	rs1465216	AQP1	1	|GTeX_Finemapped=1|EpiMap=1|ABC=1	ILMN_1776857	358	0.271452	1.29291e-05	-0.17281	0.0065858	-0.233638	0.000352144	AQP1	aquaporin 1 (Colton blood group) (AQP1), mRNA.
UKBB	disease_HYPERTENSION_DIAGNOSED	5	127350549	rs3749748	SLC12A2	1	|eQTLGen_Finemapped=1	ILMN_1720996	6558	-0.127578	0.0434479	0.116788	0.0674485	0.147483	0.0253032	SLC12A2	solute carrier family 12 (sodium/potassium/chloride transporters), member 2 (SLC12A2), mRNA.
UKBB	disease_HYPERTENSION_DIAGNOSED	7	30935739	rs12666237	AQP1	1	|EpiMap=1|ABC=1	ILMN_1681103	358	0.214657	0.000617468	-0.108812	0.0885636	-0.157813	0.0166049	AQP1	aquaporin 1 (Colton blood group) (AQP1), mRNA.
UKBB	disease_HYPERTENSION_DIAGNOSED	7	30935748	rs1465216	AQP1	1	|GTeX_Finemapped=1|EpiMap=1|ABC=1	ILMN_1681103	358	0.214657	0.000617468	-0.108812	0.0885636	-0.157813	0.0166049	AQP1	aquaporin 1 (Colton blood group) (AQP1), mRNA.
UKBB	disease_HYPERTENSION_DIAGNOSED	5	132384689	rs4574536	HSPA4	1	|GTeX_Finemapped=1|ABC=1	ILMN_1755134	3308	0.103276	0.102596	-0.221825	0.000456185	-0.120427	0.0682944	HSPA4	heat shock 70kDa protein 4 (HSPA4), mRNA.
UKBB	disease_HYPERTENSION_DIAGNOSED	5	132397351	rs55747751	HSPA4	1	|GTeX_Finemapped=1|eQTLGen_Finemapped=1	ILMN_1755134	3308	0.103276	0.102596	-0.221825	0.000456185	-0.120427	0.0682944	HSPA4	heat shock 70kDa protein 4 (HSPA4), mRNA.
UKBB	disease_HYPERTENSION_DIAGNOSED	5	132437531	rs1131809	HSPA4	1	|Exon=1|GTeX_Finemapped=1	ILMN_1755134	3308	0.103276	0.102596	-0.221825	0.000456185	-0.120427	0.0682944	HSPA4	heat shock 70kDa protein 4 (HSPA4), mRNA.
UKBB	disease_HYPERTENSION_DIAGNOSED	7	131240373	rs1615131	PODXL	1	|Promoter=1|GTeX_Finemapped=1|eQTLGen_Finemapped=1|ABC=1	ILMN_2413158	5420	-0.121319	0.0549139	0.117074	0.0667737	0.153437	0.0199065	PODXL	podocalyxin-like (PODXL), transcript variant 1, mRNA.
UKBB	disease_HYPERTENSION_DIAGNOSED	7	131241085	rs7780021	PODXL	1	|Exon=1|eQTLGen_Finemapped=1|ABC=1	ILMN_2413158	5420	-0.121319	0.0549139	0.117074	0.0667737	0.153437	0.0199065	PODXL	podocalyxin-like (PODXL), transcript variant 1, mRNA.
UKBB	disease_HYPERTENSION_DIAGNOSED	7	131304662	rs746014	PODXL	1	|EpiMap=1|ABC=1	ILMN_2413158	5420	-0.121319	0.0549139	0.117074	0.0667737	0.153437	0.0199065	PODXL	podocalyxin-like (PODXL), transcript variant 1, mRNA.
UKBB	disease_HYPERTENSION_DIAGNOSED	7	131321010	rs75672964	PODXL	1	|EpiMap=1	ILMN_2413158	5420	-0.121319	0.0549139	0.117074	0.0667737	0.153437	0.0199065	PODXL	podocalyxin-like (PODXL), transcript variant 1, mRNA.
UKBB	disease_HYPERTENSION_DIAGNOSED	7	131323710	rs75511781	PODXL	1	|EpiMap=1|ABC=1	ILMN_2413158	5420	-0.121319	0.0549139	0.117074	0.0667737	0.153437	0.0199065	PODXL	podocalyxin-like (PODXL), transcript variant 1, mRNA.
UKBB	disease_HYPERTENSION_DIAGNOSED	15	90328305	rs1042499	ANPEP	0.991	|Exon=1|GTeX_Finemapped=1	ILMN_1763837	290	0.214705	0.000615661	-0.163948	0.0100013	-0.0568175	0.39107	ANPEP	alanyl (membrane) aminopeptidase (aminopeptidase N, aminopeptidase M, microsomal aminopeptidase, CD13, p150) (ANPEP), mRNA.
UKBB	disease_HYPERTENSION_DIAGNOSED	17	72439067	rs74627195	GPRC5C	0.99	|Promoter=1|EpiMap=1|ABC=1	ILMN_2352090	55890	-0.171287	0.00652264	0.0468834	0.464171	0.0952401	0.149926	GPRC5C	G protein-coupled receptor, family C, group 5, member C (GPRC5C), transcript variant 2, mRNA.
UKBB	disease_HYPERTENSION_DIAGNOSED	7	130973495	rs35680304	PODXL	0.882	|GTeX_Finemapped=1	ILMN_2413158	5420	-0.121319	0.0549139	0.117074	0.0667737	0.153437	0.0199065	PODXL	podocalyxin-like (PODXL), transcript variant 1, mRNA.
UKBB	disease_T2D	4	88967919	rs75762896	PKD2	1	|Exon=1	ILMN_2052891	5311	0.499684	0	-0.401926	5.74774e-11	-0.313405	1.23544e-06	PKD2	polycystic kidney disease 2 (autosomal dominant) (PKD2), mRNA.
UKBB	disease_T2D	17	79480536	rs71367062	ACTG1	1	|Promoter=1|ABC=1|Cicero=1	ILMN_2053178	71	0.333011	6.49531e-08	-0.327983	1.40685e-07	-0.195637	0.00288565	ACTG1	actin, gamma 1 (ACTG1), mRNA.
UKBB	disease_T2D	4	88967919	rs75762896	PKD2	1	|Exon=1	ILMN_1807300	5311	0.282528	5.44917e-06	-0.318614	3.29938e-07	-0.279725	1.66702e-05	PKD2	polycystic kidney disease 2 (autosomal dominant) (PKD2), mRNA.
UKBB	disease_T2D	19	45410002	rs769449	APOE	1	|Promoter=1|ABC=1	ILMN_1740938	348	-0.306663	7.26693e-07	0.189615	0.00282665	0.262964	5.39993e-05	APOE	apolipoprotein E (APOE), mRNA.
UKBB	disease_T2D	19	45411941	rs429358	APOE	1	|Exon=1|EpiMap=1	ILMN_1740938	348	-0.306663	7.26693e-07	0.189615	0.00282665	0.262964	5.39993e-05	APOE	apolipoprotein E (APOE), mRNA.
UKBB	disease_T2D	7	30951426	rs146848267	AQP1	1	|Promoter=1|EpiMap=1|ABC=1	ILMN_1776857	358	0.271452	1.29291e-05	-0.17281	0.0065858	-0.233638	0.000352144	AQP1	aquaporin 1 (Colton blood group) (AQP1), mRNA.
UKBB	disease_T2D	20	50575751	rs2143549	ATP9A	1	|ABC=1	ILMN_2089073	10079	0.171184	0.00655553	-0.170835	0.00724057	-0.209557	0.00139185	ATP9A	ATPase, class II, type 9A (ATP9A), mRNA.
UKBB	disease_T2D	10	15761241	rs9333259	ITGA8	1	|Promoter=1|ABC=1	ILMN_1660306	8516	-0.19832	0.0015901	0.192401	0.00244004	0.179733	0.0062717	ITGA8	integrin, alpha 8 (ITGA8), mRNA.
UKBB	disease_T2D	17	79480536	rs71367062	ACTG1	1	|Promoter=1|ABC=1|Cicero=1	ILMN_1704961	71	0.113241	0.0733131	-0.172562	0.00666513	-0.0189452	0.775047	ACTG1	actin, gamma 1 (ACTG1), mRNA.
UKBB	disease_T2D	5	127350549	rs3749748	SLC12A2	1	|eQTLGen_Finemapped=1	ILMN_1720996	6558	-0.127578	0.0434479	0.116788	0.0674485	0.147483	0.0253032	SLC12A2	solute carrier family 12 (sodium/potassium/chloride transporters), member 2 (SLC12A2), mRNA.
UKBB	disease_T2D	7	30951426	rs146848267	AQP1	1	|Promoter=1|EpiMap=1|ABC=1	ILMN_1681103	358	0.214657	0.000617468	-0.108812	0.0885636	-0.157813	0.0166049	AQP1	aquaporin 1 (Colton blood group) (AQP1), mRNA.
UKBB	disease_T2D	7	131266224	rs17823976	PODXL	1	|EpiMap=1|ABC=1	ILMN_2413158	5420	-0.121319	0.0549139	0.117074	0.0667737	0.153437	0.0199065	PODXL	podocalyxin-like (PODXL), transcript variant 1, mRNA.
UKBB	disease_T2D	7	25399668	rs184272043	HNRNPA2B1	0.655	|EpiMap=1	ILMN_3273854	3181	-0.197478	0.00166629	0.307231	8.94501e-07	0.220667	0.000751701	HNRNPA2B1	heterogeneous nuclear ribonucleoprotein A2/B1 (HNRNPA2B1), transcript variant A2, mRNA.
UKBB	disease_T2D	7	25399668	rs184272043	HNRNPA2B1	0.655	|EpiMap=1	ILMN_3178792	3181	0.0433524	0.494149	0.244558	0.00010653	0.101939	0.123175	HNRNPA2B1	heterogeneous nuclear ribonucleoprotein A2/B1 (HNRNPA2B1), transcript variant B1, mRNA.
UKBB	disease_T2D	7	25399668	rs184272043	HNRNPA2B1	0.655	|EpiMap=1	ILMN_2369682	3181	0.170421	0.00680331	-0.149806	0.0187267	-0.160686	0.014707	HNRNPA2B1	heterogeneous nuclear ribonucleoprotein A2/B1 (HNRPA2B1), transcript variant B1, mRNA.
