# Supplementary material for: Genetic regulation of exosome biogenesis pathway in human adipose and muscle tissue and association with obesity and insulin resistance
Source: Research Square preprint supplement (doi:10.21203/rs.3.rs-6580546/v1), 2025-07-11
Supplement: Supplementary file 3 [file 393efbf3edacfb84250da18f.xlsx]

## Sheet: S.Table-4
Supplementary Table-4: Transcript levels of exosome pathway genes in skeletal muscle tissue is associated with obesity and glucometabolic traits in AAGMEx cohort (African Ancestry Americans)
Results from linear regression analysis and Spearman partial correlation analysis for all expressed exosome pathway genes are shown.
Transcript probes associated with glucometabolic traits (q-value <0.05 in linear regression) are shown in bold letters. Some genes are represented by more than one probe.
Probe_Id	Symbol	Entrez Gene ID	BMI beta	BMI adj_R2 full	BMI p-value	BMI q-value	BMI Spearman_partial_corr	BMI Spearman_corr_p value	Matsuda beta	Matsuda adj_R2_full	Matsuda p-value	Matsuda q-value	Matsuda Spearman_partial_corr	Matsuda Spearman_corr_p-value	SI beta	SI adj_R2_full	SI p-value	SI q-value	SI Spearman_partial_corr	SI Spearman_corr_p-value	Definition
ILMN_1736002	COPS5	10987	1.28093	0.246837	7.82834e-14	1.8523e-09	0.43224	1.03562e-12	-1.80474	0.197237	1.54785e-11	1.67051e-07	-0.399777	1.0597e-10	-1.61809	0.13819	6.37124e-09	3.76883e-05	-0.378377	3.86666e-09	COP9 constitutive photomorphogenic homolog subunit 5 (Arabidopsis) (COPS5), mRNA.
ILMN_1677404	RAP2A	5911	0.692547	0.114951	4.34125e-05	0.0053223	0.211863	0.000785751	-1.64799	0.184881	9.80469e-11	5.15541e-07	-0.397151	1.43725e-10	-1.4448	0.136015	8.49e-09	3.91979e-05	-0.321932	7.18899e-07	RAP2A, member of RAS oncogene family (RAP2A), mRNA.
ILMN_1759910	SERPINA5	5104	0.239005	0.0902069	0.00154089	0.0627536	0.125854	0.0477237	-0.557526	0.12156	8.83896e-07	0.00038026	-0.245007	0.000117865	-0.538138	0.0922133	2.45045e-06	0.00207076	-0.243651	0.000209954	serpin peptidase inhibitor, clade A (alpha-1 antiproteinase, antitrypsin), member 5 (SERPINA5), mRNA.
ILMN_1766334	MB	4151	0.668314	0.137788	1.57382e-06	0.000472422	0.310835	5.89651e-07	-1.02177	0.116587	1.76918e-06	0.000602323	-0.315854	5.24504e-07	-0.657855	0.0380686	0.00220295	0.12094	-0.175289	0.00812225	myoglobin (MB), transcript variant 2, mRNA.
ILMN_1755749	PGK1	5230	0.591744	0.127019	7.56284e-06	0.00142588	0.228088	0.000292731	-0.70545	0.0759453	0.000479726	0.0328064	-0.201959	0.00158809	-0.416578	0.0149714	0.0424662	0.457087	-0.143072	0.0311775	phosphoglycerate kinase 1 (PGK1), mRNA.
ILMN_2124951	RBMX	27316	-0.599423	0.0985517	0.000461871	0.027994	-0.193256	0.00223649	1.15913	0.105632	8.09277e-06	0.00190534	0.305778	1.24215e-06	1.09229	0.0687144	4.75352e-05	0.0130785	0.253503	0.000112652	RNA binding motif protein, X-linked (RBMX), mRNA.
ILMN_1655913	NUCB2	4925	0.78054	0.12017	2.04149e-05	0.00295441	0.263259	2.67902e-05	-0.817375	0.0604284	0.00406528	0.133228	-0.169861	0.00809687	-0.287369	0.000904207	0.32328	0.821315	-0.0884958	0.18399	nucleobindin 2 (NUCB2), mRNA.
ILMN_1671893	CHMP2A	27243	-0.819729	0.114162	4.8651e-05	0.00579639	-0.2183	0.000535627	1.03958	0.0719248	0.000833063	0.0476634	0.209782	0.00102651	0.86551	0.0313165	0.00515895	0.19163	0.122976	0.0643679	chromatin modifying protein 2A (CHMP2A), transcript variant 1, mRNA.
ILMN_1721713	EXOSC9	5393	-1.05105	0.0963265	0.00063661	0.0347477	-0.207703	0.00100067	1.81866	0.0873225	0.000100737	0.0108951	0.262292	3.60002e-05	1.25924	0.0276733	0.00819042	0.23293	0.170912	0.0098845	exosome component 9 (EXOSC9), transcript variant 1, mRNA.
ILMN_2153916	HSPA2	3306	0.239199	0.106266	0.000151946	0.0132179	0.226407	0.000325354	-0.33965	0.0756197	0.000501645	0.0337207	-0.207103	0.00119408	-0.119997	0.00325262	0.22115	0.747908	-0.0639782	0.337261	heat shock 70kDa protein 2 (HSPA2), mRNA.
ILMN_1670796	EXOSC10	5394	-0.573819	0.0901083	0.00156303	0.0633282	-0.208126	0.000976555	1.05541	0.0844915	0.000148561	0.0145255	0.278185	1.12243e-05	0.785501	0.0324837	0.00445121	0.17912	0.18362	0.00552223	exosome component 10 (EXOSC10), transcript variant 1, mRNA.
ILMN_1695423	CD9	928	0.280929	0.0615381	0.113455	0.591044	0.118835	0.0616803	-0.989773	0.0806474	0.000251706	0.0210079	-0.20246	0.00154505	-0.684194	0.0251276	0.011334	0.270553	-0.0899248	0.17698	CD9 molecule (CD9), mRNA.
ILMN_1711189	EXOSC10	5394	-0.761957	0.0771019	0.0104245	0.198608	-0.163877	0.00973221	1.6728	0.0796437	0.00028885	0.0229736	0.223176	0.000468671	1.39367	0.0366985	0.00261694	0.133091	0.213751	0.00119431	exosome component 10 (EXOSC10), transcript variant 1, mRNA.
ILMN_2279961	LAMP2	3920	0.427562	0.100133	0.000367714	0.0244401	0.182029	0.00402517	-0.338749	0.0407846	0.0667657	0.529501	-0.0958722	0.136981	-0.324864	0.0104194	0.07852	0.559862	-0.108519	0.102932	lysosomal-associated membrane protein 2 (LAMP2), transcript variant LAMP2B, mRNA.
ILMN_1766499	HSPA2	3306	0.198171	0.0978388	0.000511869	0.0298683	0.20473	0.00118607	-0.287051	0.0704198	0.00102444	0.0553418	-0.202154	0.00157125	-0.109494	0.00329835	0.219589	0.746397	-0.0535729	0.421814	heat shock 70kDa protein 2 (HSPA2), mRNA.
ILMN_1673282	LAMP2	3920	0.736079	0.0974733	0.000539567	0.0307638	0.221689	0.000435813	-0.661457	0.0438504	0.042432	0.44232	-0.168141	0.00877237	-0.551874	0.00859916	0.101093	0.604959	-0.120787	0.0693014	lysosomal-associated membrane protein 2 (LAMP2), transcript variant LAMP2A, mRNA.
ILMN_1809866	WDR74	54663	-0.901503	0.0972715	0.000555499	0.0314825	-0.202313	0.0013595	0.854076	0.0454841	0.0334553	0.397459	0.17404	0.00664445	0.98181	0.0232428	0.0144333	0.301106	0.172821	0.00907813	PREDICTED: WD repeat domain 74 (WDR74), mRNA.
ILMN_2243687	LAMP2	3920	0.47353	0.0967392	0.000599825	0.0334341	0.2647	2.41068e-05	-0.371875	0.039811	0.0772957	0.558883	-0.137509	0.0324978	-0.102058	-0.00244206	0.627841	0.936713	-0.0740323	0.266665	lysosomal-associated membrane protein 2 (LAMP2), transcript variant LAMP2A, mRNA.
ILMN_1809477	CARHSP1	23589	1.10678	0.0937306	0.000925919	0.045219	0.232643	0.000219022	-1.23163	0.0505055	0.016304	0.283243	-0.125646	0.050912	-1.21393	0.0208394	0.0196807	0.340248	-0.18757	0.0045735	calcium regulated heat stable protein 1, 24kDa (CARHSP1), transcript variant 2, mRNA.
ILMN_2216852	PGK1	5230	0.446941	0.0935512	0.000950229	0.0457825	0.165683	0.00894669	-0.501433	0.0505332	0.0162403	0.282625	-0.128579	0.0456992	-0.286378	0.00477934	0.17537	0.709867	-0.0931492	0.161894	phosphoglycerate kinase 1 (PGK1), mRNA.
ILMN_1752159	AHNAK	79026	-0.468431	0.0925609	0.00109635	0.0508652	-0.17913	0.00466038	0.401328	0.0401877	0.0730256	0.547853	0.115623	0.0725919	0.52096	0.0187265	0.0259021	0.376927	0.161424	0.0149058	AHNAK nucleoprotein (AHNAK), transcript variant 2, mRNA.
ILMN_1659753	LAMP2	3920	0.544249	0.0891819	0.00178737	0.0694448	0.183063	0.0038182	-0.76225	0.0599744	0.00432956	0.137693	-0.160109	0.0126338	-0.48456	0.0108101	0.0744196	0.549658	-0.135368	0.0415848	lysosomal-associated membrane protein 2 (LAMP2), transcript variant LAMP2B, mRNA.
ILMN_1789775	WDR74	54663	-0.832221	0.089018	0.00183032	0.07062	-0.169781	0.00736916	1.27139	0.0656933	0.00196344	0.0842392	0.208423	0.00110864	1.09834	0.0272145	0.00868311	0.239878	0.161943	0.0145824	PREDICTED: WD repeat domain 74 (WDR74), mRNA.
ILMN_1737242	C8G	733	-1.05221	0.0875848	0.0022529	0.080646	-0.206294	0.00108494	0.836837	0.0366797	0.125213	0.651857	0.0936789	0.146237	0.797068	0.00616684	0.142993	0.671117	0.0660189	0.322045	complement component 8, gamma polypeptide (C8G), mRNA.
ILMN_1786720	PROM1	8842	-0.491331	0.0860085	0.00283215	0.0934628	-0.200903	0.00147107	0.320192	0.0340268	0.192228	0.72684	0.0565957	0.380722	0.0769459	-0.00309712	0.763791	0.966459	0.000418061	0.995002	prominin 1 (PROM1), mRNA.
ILMN_1769822	PLAA	9373	1.28765	0.0704454	0.0281626	0.328585	0.14867	0.0191571	-2.68281	0.0637745	0.00255864	0.100485	-0.142792	0.0263367	-1.75503	0.0128952	0.0560644	0.499874	-0.148435	0.0253224	phospholipase A2-activating protein (PLAA), transcript variant 1, mRNA.
ILMN_1734194	EXOSC3	51010	0.777308	0.0706156	0.0274468	0.325701	0.121573	0.0558824	-1.64144	0.0634507	0.00267568	0.103757	-0.185491	0.00378198	-0.958248	0.0106095	0.0764956	0.555108	-0.100061	0.132831	exosome component 3 (EXOSC3), transcript variant 1, mRNA.
ILMN_1708936	EXOSC3	51010	0.706098	0.0754076	0.0133957	0.228276	0.161986	0.01062	-1.31124	0.062829	0.00291574	0.109175	-0.172531	0.0071397	-0.777594	0.0103297	0.0794951	0.562236	-0.128719	0.0527807	exosome component 3 (EXOSC3), transcript variant 1, mRNA.
ILMN_1799796	DIS3	22894	-0.80372	0.0645437	0.0699877	0.494064	-0.150135	0.0179907	2.04369	0.0622383	0.00316394	0.115579	0.177359	0.00566204	1.34234	0.0129618	0.0555639	0.499285	0.110257	0.0975058	DIS3 mitotic control homolog (S. cerevisiae) (DIS3), mRNA.
ILMN_2390416	BAG6	7917	-0.536777	0.0767663	0.0109544	0.204973	-0.150289	0.0178718	0.937632	0.0617319	0.00339364	0.120114	0.179235	0.00516604	0.636413	0.0133044	0.0530616	0.492162	0.10795	0.104761	HLA-B associated transcript 3 (BAT3), transcript variant 3, mRNA.
ILMN_1751708	ITM2B	9445	0.449396	0.0828782	0.00446718	0.123771	0.191906	0.00240428	-0.362343	0.0361128	0.136967	0.670675	-0.0675747	0.295113	-0.352171	0.00513794	0.166271	0.69665	-0.0834953	0.210123	integral membrane protein 2B (ITM2B), mRNA.
ILMN_2337336	PVRL2	5819	0.873752	0.0637319	0.0796051	0.519572	0.093459	0.142221	-2.16131	0.0588745	0.00504399	0.15117	-0.189545	0.00307393	-0.835212	0.0017052	0.282863	0.795881	-0.0360739	0.588725	poliovirus receptor-related 2 (herpesvirus entry mediator B) (PVRL2), transcript variant delta, mRNA.
ILMN_1761049	EIF2C3	192669	1.43827	0.080273	0.00653852	0.154226	0.168419	0.00786338	0.000715082	0.0270564	0.999308	0.999878	-0.00799523	0.901525	-2.00583	0.0211964	0.018792	0.333806	-0.162604	0.014179	eukaryotic translation initiation factor 2C, 3 (EIF2C3), transcript variant 2, mRNA.
ILMN_2076600	ITM2A	9452	0.295799	0.0789521	0.00793742	0.171596	0.20041	0.00151207	-0.245703	0.0357251	0.145709	0.681834	-0.11354	0.0779308	-0.409243	0.0228092	0.0152613	0.308817	-0.171909	0.00945564	integral membrane protein 2A (ITM2A), mRNA.
ILMN_1752351	LAMP2	3920	0.329082	0.0779813	0.0091564	0.185344	0.169601	0.00743294	-0.336364	0.0394537	0.0815934	0.568138	-0.124139	0.0537778	-0.169415	-0.000115881	0.386606	0.851794	-0.0718481	0.28107	lysosomal-associated membrane protein 2 (LAMP2), transcript variant LAMP2B, mRNA.
ILMN_1694980	NAGLU	4669	-1.10473	0.077878	0.00929679	0.186987	-0.165916	0.00884946	1.01392	0.0368576	0.12176	0.647421	0.127471	0.0476138	1.09952	0.00896471	0.0960518	0.5982	0.120472	0.0700355	N-acetylglucosaminidase, alpha- (NAGLU), mRNA.
ILMN_1813043	BHMT2	23743	0.565584	0.0664692	0.0517759	0.435167	0.127076	0.0455868	-1.1913	0.0558699	0.00766662	0.193355	-0.197331	0.00204078	-0.776537	0.0088983	0.0969469	0.599241	-0.127535	0.055017	betaine-homocysteine methyltransferase 2 (BHMT2), mRNA.
ILMN_1792495	AHNAK	79026	-0.504641	0.0773048	0.0101169	0.195176	-0.155683	0.0141158	0.522459	0.0386646	0.0920202	0.593199	0.123768	0.0545049	0.760988	0.0230399	0.014815	0.304726	0.16684	0.0118195	AHNAK nucleoprotein (AHNAK), transcript variant 1, mRNA.
ILMN_2402168	EXOSC10	5394	-0.322744	0.0621925	0.101963	0.56876	-0.0689342	0.279529	0.823291	0.055594	0.00796801	0.196872	0.182298	0.00444001	0.832464	0.0282675	0.00759411	0.225227	0.164173	0.0132608	exosome component 10 (EXOSC10), transcript variant 2, mRNA.
ILMN_1720829	ZFP36	7538	-0.136531	0.0767331	0.0110083	0.20542	-0.131916	0.0378937	0.15206	0.0404404	0.0703027	0.541562	0.102118	0.11308	0.115224	0.00490854	0.172028	0.705713	0.0834004	0.210643	zinc finger protein 36, C3H type, homolog (mouse) (ZFP36), mRNA.
ILMN_1805827	PPA1	5464	0.366446	0.0765041	0.0113873	0.209231	0.122024	0.0549707	-0.313863	0.0350496	0.16248	0.696265	-0.102452	0.111899	-0.462097	0.016161	0.0362738	0.42861	-0.0779898	0.241868	pyrophosphatase (inorganic) 1 (PPA1), mRNA.
ILMN_1652371	KIAA1324L	222223	0.384387	0.0596546	0.155321	0.657764	0.0682108	0.284618	-0.197464	0.0279907	0.633595	0.935626	-0.0376827	0.559639	-1.14998	0.029023	0.00689911	0.215804	-0.189549	0.00415545	KIAA1324-like (KIAA1324L), transcript variant 2, mRNA.
ILMN_1715994	HGS	9146	-0.604435	0.0759435	0.0123726	0.218534	-0.128323	0.0434898	0.449329	0.0328202	0.235851	0.764465	0.049608	0.44237	0.692631	0.0106796	0.0757627	0.553335	0.155015	0.0194505	hepatocyte growth factor-regulated tyrosine kinase substrate (HGS), mRNA.
ILMN_1755120	MAN1A2	10905	0.566727	0.0569636	0.249481	0.746989	0.0883123	0.165616	-1.96459	0.0540565	0.00988257	0.218539	-0.137204	0.0328887	-1.25331	0.00873769	0.0991495	0.602618	-0.132746	0.0457357	mannosidase, alpha, class 1A, member 2 (MAN1A2), mRNA.
ILMN_1789074	HSPA1A	3303	-0.0286294	0.0521976	0.747395	0.955932	-0.0300576	0.637596	0.351587	0.0538503	0.0101728	0.22201	0.184085	0.00405992	0.320852	0.0205724	0.0203735	0.344641	0.159905	0.0158896	heat shock 70kDa protein 1A (HSPA1A), mRNA.
ILMN_1693259	PDCD6IP	10015	0.282578	0.0611744	0.120452	0.604299	0.0762493	0.23152	-0.505105	0.0405114	0.069557	0.538907	-0.124267	0.0535301	-0.761951	0.0282607	0.0076007	0.225227	-0.189029	0.00426189	programmed cell death 6 interacting protein (PDCD6IP), mRNA.
ILMN_2312719	EXOSC9	5393	-0.439558	0.064949	0.0656562	0.479409	-0.11171	0.0791199	0.953627	0.0534296	0.0107921	0.228609	0.159083	0.0132217	0.690995	0.0121486	0.0620149	0.516136	0.10743	0.106456	exosome component 9 (EXOSC9), transcript variant 1, mRNA.
ILMN_1714567	AHNAK	79026	-0.265528	0.0625835	0.0957058	0.556614	-0.0702547	0.270399	0.56409	0.0487168	0.0210256	0.318613	0.119212	0.0640963	0.630703	0.0276037	0.00826323	0.234297	0.0716804	0.282198	AHNAK nucleoprotein (AHNAK), transcript variant 1, mRNA.
ILMN_1751500	ADAM15	8751	1.32802	0.0749307	0.0143787	0.236923	0.110717	0.081837	-0.651493	0.0294822	0.442263	0.875988	-0.0600339	0.352417	-1.76845	0.0156717	0.0386983	0.440121	-0.136669	0.039645	ADAM metallopeptidase domain 15 (ADAM15), transcript variant 4, mRNA.
ILMN_1705364	BAG6	7917	-0.765886	0.0749007	0.0144431	0.23724	-0.179612	0.00454886	1.06827	0.0471566	0.0262863	0.355007	0.156427	0.0148567	1.21375	0.0244316	0.0123906	0.280152	0.207079	0.00170803	HLA-B associated transcript 3 (BAT3), transcript variant 2, mRNA.
ILMN_1755937	ANXA2	302	1.20092	0.0740246	0.0164546	0.254638	0.168111	0.00797931	-0.801309	0.0313713	0.305233	0.812448	-0.0607156	0.346966	-1.07137	0.00495079	0.170951	0.70445	-0.0471165	0.479967	annexin A2 (ANXA2), transcript variant 2, mRNA.
ILMN_1786034	GPRC5B	51704	1.19554	0.073941	0.016661	0.256314	0.157782	0.0128536	-1.17602	0.0364899	0.12902	0.65805	-0.0773194	0.230771	-0.614801	-0.000666784	0.428232	0.870088	-0.06832	0.305429	G protein-coupled receptor, family C, group 5, member B (GPRC5B), mRNA.
ILMN_1724211	GPRC5C	55890	0.28044	0.0546001	0.396404	0.840986	0.0552657	0.386167	-1.26116	0.0507833	0.0156749	0.276915	-0.15722	0.0143511	-0.584577	0.00218762	0.261585	0.779658	-0.0667621	0.316615	G protein-coupled receptor, family C, group 5, member C (GPRC5C), transcript variant 1, mRNA.
ILMN_1682054	SRI	6717	1.0258	0.0729024	0.0194577	0.278874	0.115556	0.0692658	-0.637834	0.0306557	0.349157	0.833728	-0.0527766	0.41374	-0.694763	0.00120329	0.307369	0.811814	-0.0227406	0.733273	sorcin (SRI), transcript variant 1, mRNA.
ILMN_1753468	CD63	967	-0.316364	0.0728047	0.0197445	0.280178	-0.11509	0.0704044	0.317387	0.0364815	0.12919	0.65805	0.11251	0.0806838	0.453179	0.01767	0.0297414	0.395019	0.146181	0.0276567	CD63 molecule (CD63), transcript variant 2, mRNA.
ILMN_2369682	HNRNPA2B1	3181	0.397991	0.0724618	0.0207855	0.287738	0.129729	0.0412228	-0.193722	0.0291987	0.470282	0.88673	-0.0476741	0.460384	-0.311234	0.00243992	0.251246	0.773803	-0.0894612	0.179232	heterogeneous nuclear ribonucleoprotein A2/B1 (HNRPA2B1), transcript variant B1, mRNA.
ILMN_2070521	BHMT2	23743	0.569798	0.0722298	0.0215217	0.292353	0.154749	0.0147123	-0.660318	0.0394543	0.0815858	0.568138	-0.155806	0.0152641	-0.170251	-0.00262416	0.658979	0.944357	-0.0452707	0.497357	betaine-homocysteine methyltransferase 2 (BHMT2), mRNA.
ILMN_1674243	TFRC	7037	0.00843367	0.0519604	0.835626	0.974214	-0.0119168	0.851877	0.00502772	0.0270836	0.935243	0.99287	-0.00169557	0.979066	-0.148674	0.0229512	0.0149849	0.306146	-0.127513	0.0550587	transferrin receptor (p90, CD71) (TFRC), mRNA.
ILMN_1784206	LOC653308	653308	0.766676	0.0710388	0.0257468	0.316951	0.144203	0.0231272	-0.90717	0.0393646	0.0827047	0.570713	-0.0985531	0.126286	-0.888473	0.00883516	0.0978064	0.600953	-0.132224	0.0466018	PREDICTED: similar to N-acylsphingosine amidohydrolase 2, transcript variant 1 (LOC653308), mRNA.
ILMN_1666109	MB	4151	0.825819	0.0634386	0.0834187	0.529271	0.114106	0.0728575	-1.70254	0.0483152	0.0222664	0.328839	-0.16914	0.00837412	-1.66344	0.0190556	0.0248137	0.371014	-0.0999404	0.133303	myoglobin (MB), transcript variant 1, mRNA.
ILMN_1674009	TKTL1	8277	-0.482071	0.0572219	0.237958	0.737405	-0.0843695	0.185403	1.43384	0.0475191	0.0249539	0.347535	0.124183	0.0536924	1.33863	0.016306	0.0355859	0.424728	0.167783	0.0113438	transketolase-like 1 (TKTL1), mRNA.
ILMN_2352090	GPRC5C	55890	0.123747	0.0543378	0.419423	0.85219	0.0579189	0.363739	-0.529553	0.0473878	0.0254283	0.350601	-0.147603	0.0216258	0.00378146	-0.00350502	0.987339	0.999275	0.0251083	0.706719	G protein-coupled receptor, family C, group 5, member C (GPRC5C), transcript variant 2, mRNA.
ILMN_2409167	ANXA2	302	0.184501	0.0672993	0.0455351	0.412413	0.185236	0.00341443	-0.316442	0.0472976	0.0257595	0.351929	-0.161243	0.0120108	-0.247976	0.00998784	0.0833314	0.571106	-0.116601	0.0795917	annexin A2 (ANXA2), transcript variant 1, mRNA.
ILMN_1677314	MUC1	4582	0.411732	0.0546814	0.38964	0.838237	0.030383	0.633957	-0.107497	0.0271449	0.883386	0.984062	-0.0249573	0.699279	-1.64207	0.0194618	0.023535	0.364171	-0.108425	0.103234	mucin 1, cell surface associated (MUC1), transcript variant 1, mRNA.
ILMN_1695719	EIF2C2	27161	-0.304784	0.0601647	0.142498	0.639614	-0.074603	0.241781	0.423816	0.0342628	0.184844	0.721017	0.100561	0.118708	0.714034	0.01927	0.0241301	0.368858	0.137022	0.0391326	eukaryotic translation initiation factor 2C, 2 (EIF2C2), mRNA.
ILMN_1718303	PVRL2	5819	0.864128	0.0688336	0.0359819	0.371217	0.14764	0.0200156	-0.977932	0.0366772	0.125263	0.651857	-0.103194	0.109312	-0.58632	0.000312925	0.35809	0.839279	-0.0901915	0.175694	poliovirus receptor-related 2 (herpesvirus entry mediator B) (PVRL2), transcript variant alpha, mRNA.
ILMN_1708946	VPS4A	27183	-0.489747	0.0686591	0.0369544	0.37657	-0.125277	0.0487614	0.708951	0.0431443	0.0470581	0.460109	0.129323	0.0444496	0.288968	-0.000688976	0.430045	0.871229	0.0568923	0.393589	vacuolar protein sorting 4 homolog A (S. cerevisiae) (VPS4A), mRNA.
ILMN_1722634	NUCB1	4924	-0.26423	0.0683966	0.0384685	0.382768	-0.123793	0.0515176	0.229923	0.0326367	0.243475	0.772407	0.0206208	0.749608	0.167697	-0.000189375	0.391811	0.853469	0.0405879	0.542927	nucleobindin 1 (NUCB1), mRNA.
ILMN_1755974	ALDOC	230	0.130384	0.0531615	0.553846	0.903995	0.00633527	0.920928	0.707149	0.0456176	0.0328147	0.393934	0.142348	0.0268124	0.0458886	-0.00342623	0.894332	0.988086	0.0454851	0.49532	aldolase C, fructose-bisphosphate (ALDOC), mRNA.
ILMN_1714023	SLC9A5	6553	-0.871559	0.063721	0.079743	0.519862	-0.112026	0.0782679	1.08712	0.0349926	0.163991	0.697908	0.123203	0.0556255	1.68805	0.0172594	0.0313878	0.403022	0.172245	0.00931495	solute carrier family 9 (sodium/hydrogen exchanger), member 5 (SLC9A5), mRNA.
ILMN_1669645	PKD1	5310	-0.500628	0.067668	0.0430208	0.403063	-0.139275	0.0283129	0.314245	0.0299405	0.402078	0.860288	0.0826558	0.200068	0.0162358	-0.00349792	0.965998	0.99728	0.0417672	0.531259	polycystic kidney disease 1 (autosomal dominant) (PKD1), transcript variant 1, mRNA.
ILMN_1681103	AQP1	358	0.083453	0.0522299	0.73788	0.953522	0.0355361	0.577547	-0.0555962	0.027146	0.882696	0.984011	-0.00101226	0.987501	-0.808697	0.0170529	0.0322514	0.407853	-0.127954	0.054217	aquaporin 1 (Colton blood group) (AQP1), mRNA.
ILMN_2364864	MB	4151	0.320412	0.0551664	0.352478	0.818969	0.0489868	0.442482	-1.07719	0.0447442	0.037247	0.417822	-0.103056	0.109791	-0.208456	-0.00280948	0.694904	0.952899	-0.00149323	0.98215	myoglobin (MB), transcript variant 1, mRNA.
ILMN_2125869	ACTA1	58	0.865392	0.0668269	0.0489835	0.425564	0.0556216	0.38311	-0.658349	0.0307975	0.339814	0.829133	-0.0449106	0.486818	-0.587159	-6.9955e-05	0.383403	0.850608	0.0191187	0.774504	actin, alpha 1, skeletal muscle (ACTA1), mRNA.
ILMN_1807300	PKD2	5311	-0.366937	0.0537949	0.473947	0.875866	-0.0188433	0.767786	1.59522	0.0444321	0.0389781	0.427529	0.13148	0.0409897	1.07853	0.0054496	0.158796	0.686488	0.0917138	0.168487	polycystic kidney disease 2 (autosomal dominant) (PKD2), mRNA.
ILMN_2076602	ITM2A	9452	0.858281	0.0666741	0.0501565	0.429418	0.103309	0.104582	-0.104778	0.0271534	0.877972	0.983866	-0.00776279	0.904374	-0.405502	-0.00189279	0.550513	0.913785	-0.0352146	0.597641	integral membrane protein 2A (ITM2A), mRNA.
ILMN_1766171	SNF8	11267	0.366011	0.0661644	0.0542885	0.443367	0.136446	0.0317176	-0.578123	0.0434095	0.0452615	0.453779	-0.127846	0.0469582	-0.48295	0.00865722	0.100273	0.603866	-0.0824296	0.216021	SNF8, ESCRT-II complex subunit, homolog (S. cerevisiae) (SNF8), mRNA.
ILMN_2184184	ANXA1	301	0.153786	0.0661039	0.0548019	0.4456	0.140491	0.0269484	-0.136085	0.0320268	0.271077	0.79214	-0.0675471	0.295311	-0.097349	-0.000743319	0.434534	0.873187	-0.0650554	0.329173	annexin A1 (ANXA1), mRNA.
ILMN_2381397	HSPD1	3329	0.321091	0.065792	0.0575325	0.455667	0.107791	0.0902912	-0.0451627	0.0271773	0.863884	0.981457	-0.0353949	0.583736	-0.198228	-0.00101511	0.458104	0.883945	-0.0586897	0.378791	heat shock 60kDa protein 1 (chaperonin) (HSPD1), nuclear gene encoding mitochondrial protein, transcript variant 1, mRNA.
ILMN_1663684	ATP13A3	79572	-1.14831	0.0657377	0.0580224	0.457382	-0.0872477	0.170796	0.59379	0.0286821	0.52942	0.905776	0.0029627	0.96343	0.267094	-0.00312273	0.771094	0.967539	0.00779135	0.907064	PREDICTED: ATPase type 13A3, transcript variant 3 (ATP13A3), mRNA.
ILMN_1712312	RAB11A	8766	-0.244691	0.0560302	0.29729	0.782387	-0.0596813	0.3493	0.365598	0.0314178	0.302635	0.811055	0.051075	0.428977	0.709218	0.0146584	0.0442722	0.463066	0.130946	0.0487805	RAB11A, member RAS oncogene family (RAB11A), mRNA.
ILMN_1689953	CD81	975	0.209299	0.0654787	0.0604204	0.46408	0.149634	0.0183821	-0.279793	0.0381178	0.100086	0.611308	-0.0969874	0.132451	-0.0177172	-0.00345691	0.916963	0.991255	-0.0128614	0.847182	CD81 molecule (CD81), mRNA.
ILMN_1714602	CD86	942	-0.843017	0.0644549	0.0709762	0.496351	-0.13082	0.0395324	1.43721	0.0429288	0.0485728	0.465884	0.102077	0.113226	1.29687	0.0108183	0.0743358	0.549658	0.0554397	0.405798	CD86 molecule (CD86), transcript variant 2, mRNA.
ILMN_1743357	XPNPEP2	7512	-0.59288	0.0559962	0.299238	0.783488	-0.0220848	0.729285	0.57434	0.0287637	0.519255	0.903368	0.0442318	0.493433	1.74693	0.0141076	0.047648	0.475419	0.113764	0.0872427	X-prolyl aminopeptidase (aminopeptidase P) 2, membrane-bound (XPNPEP2), mRNA.
ILMN_1765409	STAM	8027	-0.575478	0.0649555	0.0655897	0.479367	-0.118096	0.0633277	0.27064	0.0283263	0.578368	0.921677	0.0505285	0.433939	0.538183	0.00223591	0.259566	0.777967	0.0461725	0.488819	signal transducing adaptor molecule (SH3 domain and ITAM motif) 1 (STAM), mRNA.
ILMN_1792075	CD22	933	0.875865	0.0619958	0.105278	0.576616	0.0945484	0.137609	-1.09134	0.034242	0.185481	0.721644	-0.0788918	0.221398	-1.55707	0.0130922	0.0545967	0.4973	-0.137048	0.0390951	CD22 molecule (CD22), mRNA.
ILMN_1756162	EXOSC8	11340	-0.103556	0.0532913	0.535615	0.898244	-0.0539435	0.397649	0.487832	0.0413373	0.0614764	0.512957	0.137323	0.0327351	0.246668	0.000514428	0.345685	0.833266	0.0575617	0.388037	exosome component 8 (EXOSC8), mRNA.
ILMN_1677590	RAP2B	5912	0.788903	0.0635526	0.0819132	0.525371	0.136328	0.0318664	-1.17453	0.0383166	0.0970678	0.605428	-0.111452	0.0835946	-1.17029	0.00951304	0.088993	0.583297	-0.124143	0.0618598	RAP2B, member of RAS oncogene family (RAP2B), mRNA.
ILMN_1658660	ACTC1	70	-0.00532139	0.0519199	0.856531	0.977938	0.0383671	0.54759	0.0827727	0.040936	0.0652708	0.525791	0.0940233	0.144753	0.0836258	0.0113259	0.0693531	0.537064	0.114222	0.085971	actin, alpha, cardiac muscle 1 (ACTC1), mRNA.
ILMN_2411282	QSOX1	5768	0.31838	0.0631573	0.0872622	0.53903	0.144994	0.0223764	-0.387549	0.0348276	0.168461	0.703414	-0.119317	0.0638609	-0.431229	0.00687834	0.129034	0.651146	-0.0900407	0.176421	quiescin Q6 sulfhydryl oxidase 1 (QSOX1), transcript variant 2, mRNA.
ILMN_1799728	ADAM15	8751	-0.577367	0.0628004	0.0924137	0.550169	-0.103472	0.104034	0.718155	0.034451	0.17919	0.716011	0.104885	0.103595	0.410127	-0.000816946	0.440731	0.876068	0.0425274	0.523805	PREDICTED: ADAM metallopeptidase domain 15 (metargidin) (ADAM15), mRNA.
ILMN_2342455	PPA2	27068	-0.155213	0.0566155	0.266103	0.758866	-0.0485937	0.446157	0.220029	0.0313141	0.308467	0.815229	0.0694417	0.281942	0.374289	0.0106996	0.0755551	0.552627	0.0928978	0.163034	pyrophosphatase (inorganic) 2 (PPA2), nuclear gene encoding mitochondrial protein, transcript variant 2, mRNA.
ILMN_1741148	ALDOA	226	0.373988	0.0627221	0.093588	0.552691	0.0891056	0.161834	-0.0792984	0.027272	0.818908	0.976376	0.00646645	0.920285	-0.212827	-0.00180335	0.539657	0.910238	-0.0243481	0.715208	aldolase A, fructose-bisphosphate (ALDOA), transcript variant 3, mRNA.
ILMN_1744381	SERPINE1	5054	-0.898792	0.0626854	0.0941435	0.55371	-0.120715	0.0576487	0.417086	0.0281093	0.612834	0.932142	0.037121	0.565511	-0.585438	-0.00130434	0.485478	0.894803	-0.0339564	0.610803	serpin peptidase inhibitor, clade E (nexin, plasminogen activator inhibitor type 1), member 1 (SERPINE1), mRNA.
ILMN_1713807	MAN1C1	57134	0.115085	0.0520954	0.78061	0.963254	-0.00121159	0.984854	-1.1097	0.0397261	0.078295	0.560364	-0.0883496	0.170699	-0.0344889	-0.00349237	0.956003	0.995732	-0.0147907	0.824605	mannosidase, alpha, class 1C, member 1 (MAN1C1), mRNA.
ILMN_1766713	HSPD1	3329	0.241453	0.0624017	0.0985613	0.561732	0.0670137	0.293174	0.0136001	0.0270717	0.951441	0.995069	-0.017921	0.781501	0.0187384	-0.00347563	0.934575	0.993397	0.0101335	0.879315	heat shock 60kDa protein 1 (chaperonin) (HSPD1), nuclear gene encoding mitochondrial protein, transcript variant 1, mRNA.
ILMN_1680453	ITM2C	81618	0.164258	0.0540402	0.448031	0.864622	0.0538138	0.398787	-0.570141	0.0396369	0.0793587	0.562621	-0.0786469	0.222839	-0.294711	0.00011196	0.371076	0.844221	-0.0560378	0.400744	integral membrane protein 2C (ITM2C), transcript variant 2, mRNA.
ILMN_2251253	ALDOA	226	-0.144653	0.0590139	0.173317	0.678681	-0.0782208	0.219642	0.0928738	0.028301	0.582179	0.92251	0.0759644	0.239071	0.291715	0.0102486	0.0803873	0.563742	0.113692	0.0874447	aldolase A, fructose-bisphosphate (ALDOA), transcript variant 3, mRNA.
ILMN_1769083	GSTA3	2940	0.86147	0.0623129	0.0999898	0.565059	0.100584	0.114106	-0.986474	0.0330286	0.22754	0.757251	-0.0969931	0.132428	-0.161224	-0.00333612	0.846379	0.980593	-0.0253171	0.704394	glutathione S-transferase A3 (GSTA3), mRNA.
ILMN_1694584	CLTCL1	8218	-0.0725768	0.052416	0.689509	0.944531	-0.0351061	0.582163	0.158618	0.0284008	0.567419	0.917962	0.0336578	0.602347	0.48072	0.0101109	0.0819278	0.567484	0.146571	0.0272401	clathrin, heavy chain-like 1 (CLTCL1), mRNA.
ILMN_2050790	HSPB2-C11orf52,C11orf52	91894	0.158733	0.0521	0.778981	0.963147	0.0171456	0.788188	0.49629	0.0284235	0.564163	0.917264	0.0453016	0.483029	1.4995	0.00986841	0.0847181	0.57418	0.0898393	0.177394	chromosome 11 open reading frame 52 (C11orf52), mRNA.
ILMN_1811221	SLC5A8	160728	-0.305148	0.0574841	0.226912	0.728461	-0.0483841	0.448123	0.492684	0.0335815	0.207118	0.740301	0.0817387	0.205122	0.685518	0.00983681	0.0850892	0.574567	0.153117	0.0210088	solute carrier family 5 (iodide transporter), member 8 (SLC5A8), mRNA.
ILMN_1772692	DICER1	23405	-0.378129	0.0619613	0.105872	0.578205	-0.0878562	0.167821	0.608755	0.0390659	0.0865496	0.579237	0.112207	0.0815088	0.446207	0.00360912	0.209319	0.740219	0.0505644	0.448385	Dicer1, Dcr-1 homolog (Drosophila) (DICER1), transcript variant 2, mRNA.
ILMN_1739594	ACOT11	26027	-0.206548	0.0617885	0.108899	0.584312	-0.101513	0.110786	0.315087	0.0375118	0.109929	0.62745	0.0851138	0.186968	0.155536	-0.000690266	0.430151	0.871293	0.0792793	0.234148	acyl-CoA thioesterase 11 (ACOT11), transcript variant 2, mRNA.
ILMN_1716524	RAB7A	7879	0.176816	0.0552856	0.344098	0.813863	0.0617626	0.33272	-0.486782	0.0389363	0.0882769	0.584545	-0.128313	0.0461525	-0.462751	0.00822559	0.106543	0.615543	-0.104242	0.11731	RAB7A, member RAS oncogene family (RAB7A), mRNA.
ILMN_1813117	ITGA9	3680	0.811825	0.0616108	0.112113	0.588128	0.0884653	0.164882	-0.894784	0.0323068	0.257951	0.782526	-0.0747428	0.246731	-0.566645	-0.00124505	0.479654	0.892138	-0.0520767	0.434912	integrin, alpha 9 (ITGA9), mRNA.
ILMN_1803590	ZFC3H1	196441	-0.661112	0.061472	0.114694	0.593275	-0.122011	0.0549966	0.661453	0.0311156	0.320047	0.820611	0.0782801	0.225012	0.137999	-0.00329728	0.829977	0.977477	0.0259363	0.697514	zinc finger, C3H1-type containing (ZFC3H1), mRNA.
ILMN_1694249	CD34	947	0.150365	0.0520504	0.797133	0.967681	0.0393904	0.536953	1.46946	0.0383534	0.09652	0.604502	0.105429	0.101806	1.43035	0.0084824	0.102763	0.607349	0.10747	0.106323	CD34 antigen (CD34), transcript variant 2, mRNA.
ILMN_1782545	SLC2A4	6517	-0.388161	0.0611498	0.12094	0.605092	-0.103354	0.104431	0.451863	0.0326246	0.243992	0.772584	0.102377	0.112164	0.241682	-0.00173217	0.531295	0.908589	0.0287873	0.666164	solute carrier family 2 (facilitated glucose transporter), member 4 (SLC2A4), mRNA.
ILMN_1690733	EGF	1950	0.185715	0.0609656	0.124681	0.610923	0.0999771	0.116317	-0.153662	0.0299053	0.404972	0.861261	-0.0339952	0.598711	0.0706918	-0.00284424	0.70224	0.9546	-0.0138155	0.836	epidermal growth factor (beta-urogastrone) (EGF), mRNA.
ILMN_2413158	PODXL	5420	0.26305	0.0589605	0.17492	0.680306	0.0843862	0.185316	0.0105588	0.0270617	0.971479	0.996507	-0.026008	0.68727	-0.461797	0.00829408	0.10552	0.612852	-0.0741005	0.266223	podocalyxin-like (PODXL), transcript variant 1, mRNA.
ILMN_1732799	CD34	947	0.108164	0.0549217	0.370579	0.827297	0.0558982	0.380745	0.299874	0.0379245	0.103117	0.616497	0.109042	0.0905377	0.198156	0.00166514	0.284725	0.797631	0.0755147	0.25718	CD34 antigen (CD34), transcript variant 2, mRNA.
ILMN_1677305	PVR	5817	0.397456	0.0587062	0.182795	0.688454	0.0702784	0.270237	-0.748839	0.0378368	0.104525	0.619774	-0.0814962	0.206474	-0.564085	0.00298379	0.2306	0.756879	-0.083197	0.211762	poliovirus receptor (PVR), mRNA.
ILMN_3273854	HNRNPA2B1	3181	-0.204714	0.0542434	0.428187	0.856473	-0.0477499	0.454102	0.638387	0.0377824	0.105409	0.622036	0.135351	0.0353467	0.479035	0.00274255	0.239494	0.763249	0.0271991	0.68356	heterogeneous nuclear ribonucleoprotein A2/B1 (HNRNPA2B1), transcript variant A2, mRNA.
ILMN_2383349	STEAP3	55240	-0.0106227	0.0518012	0.961418	0.99325	-0.0109806	0.863395	-0.539024	0.0377435	0.106046	0.623332	-0.124671	0.0527523	-0.17535	-0.00224378	0.597478	0.92726	-0.0421236	0.527757	STEAP family member 3 (STEAP3), transcript variant 2, mRNA.
ILMN_2363586	SDCBP	6386	0.203905	0.0606023	0.132436	0.624416	0.0734764	0.248984	-0.130917	0.028635	0.535453	0.908621	-0.0376556	0.559922	0.0752591	-0.00293216	0.721844	0.957988	0.0397204	0.55159	syndecan binding protein (syntenin) (SDCBP), transcript variant 2, mRNA.
ILMN_1660306	ITGA8	8516	0.112386	0.052163	0.758055	0.958158	0.0587688	0.35673	-0.873295	0.0376107	0.108254	0.625006	-0.131401	0.0411123	-0.526339	0.000418539	0.351514	0.83622	-0.0965422	0.147082	integrin, alpha 8 (ITGA8), mRNA.
ILMN_1740917	SCNN1B	6338	0.827768	0.0605389	0.133843	0.626318	0.0826723	0.194435	-0.637347	0.0293003	0.459929	0.883006	-0.0533325	0.408832	-0.695338	-0.000625702	0.424905	0.86822	-0.0892622	0.180205	sodium channel, nonvoltage-gated 1, beta (SCNN1B), mRNA.
ILMN_1774528	GPRC5C	55890	0.741949	0.0604443	0.135975	0.62983	0.0893907	0.16049	-0.910488	0.0328848	0.233238	0.762365	-0.0821923	0.20261	0.0518345	-0.0034865	0.947483	0.994925	0.0032891	0.960695	G protein-coupled receptor, family C, group 5, member C (GPRC5C), transcript variant 1, mRNA.
ILMN_2169439	ITGAV	3685	0.19739	0.0576629	0.219735	0.722723	0.0904379	0.155627	-0.168432	0.028999	0.491755	0.895349	-0.0655709	0.309698	-0.409729	0.00766692	0.1153	0.631956	-0.106854	0.108355	integrin, alpha V (vitronectin receptor, alpha polypeptide, antigen CD51) (ITGAV), mRNA.
ILMN_1815308	SDC1	6382	-0.628942	0.0602611	0.140209	0.635628	-0.0633531	0.320396	-0.622637	0.0307591	0.342308	0.830636	-0.0705429	0.274363	0.236205	-0.00296494	0.729585	0.95994	0.0203558	0.760344	syndecan 1 (SDC1), transcript variant 1, mRNA.
ILMN_2152131	ACTB	60	0.0243793	0.052112	0.774836	0.96263	0.0210057	0.742033	-0.081227	0.0286422	0.534518	0.908394	-0.0528666	0.412943	-0.201876	0.00745006	0.118909	0.637853	-0.123362	0.0635283	actin, beta (ACTB), mRNA.
ILMN_1745271	EXOSC4	54512	-0.346283	0.0541541	0.436736	0.85964	-0.0392771	0.538126	1.07562	0.037139	0.116508	0.638308	0.060983	0.344843	-0.266854	-0.0028406	0.701462	0.95452	-0.0492786	0.460024	exosome component 4 (EXOSC4), mRNA.
ILMN_1658684	ATP9B	374868	0.609494	0.0599767	0.14708	0.645185	0.11033	0.0829171	-0.496889	0.0294459	0.445707	0.877357	-0.0659732	0.306733	-0.251304	-0.00282952	0.699107	0.954141	0.00622169	0.925727	ATPase, class II, type 9B (ATP9B), mRNA.
ILMN_1750008	SUPV3L1	6832	0.0655584	0.0520079	0.814243	0.970465	0.0171455	0.788188	-0.413041	0.0308352	0.337386	0.828707	-0.0761601	0.237859	-0.651108	0.00696372	0.127464	0.649226	-0.122128	0.0662432	suppressor of var1, 3-like 1 (S. cerevisiae) (SUPV3L1), mRNA.
ILMN_1784516	TTC18	118491	0.207701	0.0523783	0.698561	0.946956	0.0122788	0.847432	-1.26349	0.0367782	0.123289	0.649745	-0.114865	0.0744992	-0.641956	-0.000765923	0.436423	0.874083	-0.0580583	0.383949	tetratricopeptide repeat domain 18 (TTC18), mRNA.
ILMN_1795822	DIS3L	115752	-0.122342	0.053332	0.530123	0.896894	-0.0127138	0.842096	-0.466901	0.0366814	0.125181	0.651857	-0.0850359	0.187374	-0.0827184	-0.00317807	0.78783	0.970368	0.0194729	0.770442	DIS3 mitotic control homolog (S. cerevisiae)-like (DIS3L), mRNA.
ILMN_1683883	ACY1,ABHD14A-ACY1	95	0.267605	0.0597515	0.15279	0.653619	0.116019	0.0681517	-0.0680649	0.027278	0.816475	0.976283	-0.0691288	0.284122	-0.0880316	-0.00306549	0.755108	0.964363	-0.0374588	0.574487	aminoacylase 1 (ACY1), mRNA.
ILMN_1739734	CLTCL1	8218	-0.26915	0.0590176	0.173206	0.678681	-0.0743431	0.24343	0.249668	0.0297487	0.418207	0.867829	0.0523645	0.4174	0.483596	0.00676876	0.131082	0.65476	0.0863962	0.194655	clathrin, heavy chain-like 1 (CLTCL1), mRNA.
ILMN_1783253	DDX12	440081	0.577945	0.0594251	0.161512	0.664002	0.0720891	0.258056	0.808176	0.0336737	0.203928	0.737265	0.045515	0.480968	0.0539707	-0.00347359	0.932433	0.993012	-0.00396825	0.952587	PREDICTED: DEAD/H (Asp-Glu-Ala-Asp/His) box polypeptide 12 (CHL1-like helicase homolog, S. cerevisiae), transcript variant 4 (DDX12), mRNA.
ILMN_1732468	HSPA4L	22824	0.0399303	0.0518168	0.936569	0.988917	-0.00103142	0.987106	1.16183	0.03631	0.132744	0.664701	0.0853557	0.185714	-0.136088	-0.00337362	0.864188	0.982703	-0.0145655	0.827233	heat shock 70kDa protein 4-like (HSPA4L), mRNA.
ILMN_2059452	SLC12A2	6558	0.252749	0.0592969	0.165091	0.6686	0.0660098	0.300482	0.0544952	0.0272081	0.847706	0.978829	0.00343263	0.957634	0.0427826	-0.00340642	0.882045	0.985624	-0.00881674	0.8949	solute carrier family 12 (sodium/potassium/chloride transporters), member 2 (SLC12A2), mRNA.
ILMN_1752582	RAB5B	5869	0.216708	0.0591067	0.170568	0.675156	0.0799139	0.209793	-0.100641	0.0277923	0.672278	0.944991	-0.0207808	0.74773	-0.215511	0.000155732	0.368193	0.843144	-0.036494	0.58439	RAB5B, member RAS oncogene family (RAB5B), mRNA.
ILMN_2038777	ACTB	60	0.0246933	0.0521416	0.764938	0.960307	0.0251306	0.693714	-0.0730858	0.0284274	0.563603	0.917264	-0.0610231	0.344525	-0.182574	0.00595171	0.14754	0.675766	-0.13056	0.0494552	actin, beta (ACTB), mRNA.
ILMN_1686367	HSPA8	3312	0.0127709	0.0518145	0.939593	0.989681	0.0186077	0.770608	-0.206078	0.0295504	0.435917	0.87306	-0.0647885	0.315519	-0.376453	0.00588948	0.148885	0.678055	-0.104865	0.115123	heat shock 70kDa protein 8 (HSPA8), transcript variant 1, mRNA.
ILMN_1720996	SLC12A2	6558	0.149604	0.0566691	0.263457	0.757462	0.0484284	0.447706	-0.296194	0.0358249	0.1434	0.679633	-0.0885701	0.16963	-0.0919773	-0.00257478	0.650178	0.942193	-0.035508	0.59459	solute carrier family 12 (sodium/potassium/chloride transporters), member 2 (SLC12A2), mRNA.
ILMN_1795325	ACTG2	72	-0.0657054	0.0589485	0.175284	0.680306	-0.100326	0.11504	-0.0784989	0.0313383	0.307093	0.814199	-0.0613144	0.342222	-0.0210571	-0.00316191	0.782798	0.970048	-0.0365724	0.583581	actin, gamma 2, smooth muscle, enteric (ACTG2), mRNA.
ILMN_2339028	PKD1	5310	-0.233835	0.0588703	0.177669	0.682089	-0.101004	0.112594	0.175269	0.0288701	0.506501	0.899844	0.0654972	0.310243	0.245342	0.000391085	0.353207	0.837275	0.0562424	0.399024	polycystic kidney disease 1 (autosomal dominant) (PKD1), transcript variant 1, mRNA.
ILMN_2413084	HSPA8	3312	0.0262656	0.0518898	0.874378	0.980566	0.0266569	0.676133	-0.0940426	0.0276012	0.715883	0.954115	-0.00429883	0.946957	-0.356641	0.0053547	0.161031	0.689991	-0.0977433	0.142094	heat shock 70kDa protein 8 (HSPA8), transcript variant 2, mRNA.
ILMN_1736597	TKT	7086	0.210857	0.0554909	0.330275	0.803414	0.113859	0.0734823	-0.465716	0.0353022	0.155964	0.692504	-0.185994	0.00368671	-0.13627	-0.00279205	0.691304	0.952538	-0.0791357	0.234998	transketolase (Wernicke-Korsakoff syndrome) (TKT), mRNA.
ILMN_1740351	IST1	9798	-0.00806951	0.0517967	0.972516	0.995358	0.0432489	0.497796	0.498345	0.0348339	0.168288	0.703414	0.074807	0.246324	0.00979066	-0.00350301	0.978971	0.998693	-0.0212001	0.750725	KIAA0174 (KIAA0174), mRNA.
ILMN_1680129	NSUN2	54888	-0.26485	0.0578007	0.214383	0.718952	-0.11156	0.0795259	0.449296	0.0347215	0.171408	0.706299	0.096128	0.135932	0.408493	0.00257728	0.245827	0.769019	0.0962342	0.148383	NOP2/Sun domain family, member 2 (NSUN2), mRNA.
ILMN_1712888	HSPH1	10808	0.0038644	0.0517963	0.973869	0.995703	0.00145548	0.981806	-0.246696	0.0346535	0.173327	0.708566	-0.106094	0.0996541	-0.203738	0.00168057	0.284006	0.797077	-0.0729371	0.273824	heat shock 105kDa/110kDa protein 1 (HSPH1), mRNA.
ILMN_2349831	DICER1	23405	0.0426907	0.0518846	0.877747	0.981136	-0.00305965	0.961764	0.195893	0.0278689	0.656677	0.941011	0.0324063	0.615917	0.58322	0.00481952	0.174323	0.709184	0.0619126	0.353123	Dicer1, Dcr-1 homolog (Drosophila) (DICER1), transcript variant 2, mRNA.
ILMN_1803136	RAB4B,MIA-RAB4B	53916	-0.33875	0.0533363	0.529557	0.896432	-0.0133558	0.834234	-1.10294	0.0344666	0.17873	0.715545	-0.109395	0.0894929	-0.927147	0.00218192	0.261825	0.779658	-0.0874295	0.189351	RAB4B, member RAS oncogene family (RAB4B), mRNA.
ILMN_1779182	TMEM98	26022	0.1816	0.0534198	0.518618	0.89221	0.0875548	0.16929	-0.56734	0.0344548	0.179077	0.716011	-0.117537	0.0679536	-0.0986045	-0.0032573	0.814687	0.975089	-0.0553519	0.406543	transmembrane protein 98 (TMEM98), transcript variant 2, mRNA.
ILMN_1711899	ANXA2	302	0.259765	0.0578456	0.212674	0.716547	0.128096	0.043865	-0.312907	0.0310608	0.323337	0.822341	-0.0987642	0.125472	-0.105236	-0.00300311	0.738936	0.961976	-0.0287273	0.666818	annexin A2 (ANXA2), transcript variant 2, mRNA.
ILMN_2051408	PNPT1	87178	-0.0474856	0.0520284	0.805808	0.969525	-0.00279137	0.965114	0.0179595	0.0270713	0.952042	0.995069	-0.00277811	0.965707	0.390019	0.00455268	0.181416	0.71671	0.0436852	0.512556	polyribonucleotide nucleotidyltransferase 1 (PNPT1), mRNA.
ILMN_2353978	ACOT11	26027	-0.0642638	0.0518753	0.883987	0.981964	-0.0195888	0.758877	-0.0293544	0.0270639	0.966033	0.995951	-0.00535936	0.933898	0.919361	0.00449774	0.182917	0.718238	0.123773	0.0626463	acyl-CoA thioesterase 11 (ACOT11), transcript variant 1, mRNA.
ILMN_1782939	ALB	213	0.128479	0.0522304	0.737741	0.953522	0.0156999	0.805676	-0.775259	0.0339304	0.195344	0.729446	-0.0991378	0.124042	-0.386642	-0.00150075	0.505635	0.901011	-0.0575561	0.388084	albumin (ALB), mRNA.
ILMN_2356991	CD47	961	0.578959	0.0573903	0.230792	0.731627	0.0924862	0.146437	0.388114	0.0281957	0.598604	0.928232	0.0480843	0.456529	0.145782	-0.00332753	0.842596	0.979625	0.0285683	0.668552	CD47 molecule (CD47), transcript variant 1, mRNA.
ILMN_2366041	ITM2C	81618	0.143183	0.052961	0.58443	0.914798	0.0526553	0.409031	-0.51269	0.0338334	0.198537	0.732056	-0.0734675	0.254909	-0.490594	0.0034174	0.215586	0.743877	-0.101856	0.125985	integral membrane protein 2C (ITM2C), transcript variant 2, mRNA.
ILMN_1663042	SDC4	6385	0.237211	0.0573607	0.232033	0.732886	0.0520534	0.414415	-0.368731	0.0330388	0.227143	0.756977	-0.0803171	0.213138	-0.0185089	-0.00348972	0.95197	0.99545	0.0172631	0.795883	syndecan 4 (SDC4), mRNA.
ILMN_1769883	IDE	3416	-0.114704	0.0524975	0.670963	0.938938	-0.0410791	0.519629	-0.145724	0.027571	0.723551	0.955829	0.0414871	0.520664	-0.529126	0.00386475	0.201294	0.734615	-0.050945	0.444973	insulin-degrading enzyme (IDE), mRNA.
ILMN_2363591	SDCBP	6386	0.205359	0.0572289	0.237657	0.737176	0.0632955	0.320837	-0.15237	0.0284363	0.562344	0.916846	-0.00383143	0.952717	0.206973	-0.000754496	0.435467	0.873462	0.0768674	0.248731	syndecan binding protein (syntenin) (SDCBP), transcript variant 2, mRNA.
ILMN_1659725	EXOSC5	56915	-0.262589	0.0550001	0.364643	0.824893	-0.0630628	0.322623	0.388964	0.0302838	0.37537	0.846975	0.034096	0.597627	0.576884	0.00374445	0.205025	0.737679	0.0806459	0.226157	exosome component 5 (EXOSC5), mRNA.
ILMN_1756982	CLIC1	1192	0.153214	0.0543751	0.416032	0.849934	0.104202	0.101599	-0.282746	0.0311346	0.318915	0.820282	-0.109037	0.090554	-0.36286	0.00367623	0.207177	0.73947	-0.118677	0.0743438	chloride intracellular channel 1 (CLIC1), mRNA.
ILMN_2055477	EXOSC7	23016	-0.0423092	0.0527028	0.629287	0.927451	-0.0510294	0.423668	-0.168402	0.0336097	0.206137	0.739711	-0.052864	0.412965	-0.135673	0.000986438	0.3188	0.818899	-0.0186619	0.779752	exosome component 7 (EXOSC7), mRNA.
ILMN_1771333	CD47	961	0.0134087	0.0518031	0.957738	0.992652	0.0340444	0.593633	0.4947	0.0335146	0.209471	0.742357	0.119519	0.0634084	0.349927	2.99245e-05	0.376565	0.846363	0.0561675	0.399653	CD47 molecule (CD47), transcript variant 2, mRNA.
ILMN_1742187	MAN1A1	4121	0.357095	0.0547422	0.384693	0.836134	0.0761538	0.232107	-0.0103949	0.0270575	0.986743	0.998075	-0.0151696	0.814384	-0.778342	0.00339881	0.216205	0.744433	-0.0977074	0.142241	mannosidase, alpha, class 1A, member 1 (MAN1A1), mRNA.
ILMN_1654566	HSPA1L	3305	0.252125	0.0570056	0.247561	0.745224	0.0873471	0.170307	0.2718	0.0297299	0.419836	0.868295	0.0785728	0.223277	0.199253	-0.00198055	0.561566	0.917079	0.0333336	0.617365	heat shock 70kDa protein 1-like (HSPA1L), mRNA.
ILMN_2341229	CD34	947	0.0744905	0.0544589	0.408556	0.846032	0.0620898	0.33016	0.146496	0.0318413	0.280233	0.79734	0.0850142	0.187486	0.168566	0.00324991	0.221243	0.747908	0.119019	0.0735066	CD34 molecule (CD34), transcript variant 2, mRNA.
ILMN_1781360	MPHOSPH6	10200	-0.557883	0.0568198	0.256189	0.751208	-0.0395949	0.53484	0.861585	0.0324259	0.25261	0.77803	0.0623942	0.333773	-0.00618176	-0.00350587	0.993706	0.99974	-0.0124516	0.851995	M-phase phosphoprotein 6 (MPHOSPH6), mRNA.
ILMN_1711311	PODXL	5420	0.569772	0.0567392	0.260047	0.753917	0.0553656	0.385307	0.451279	0.0284366	0.562299	0.916846	-0.000358589	0.995572	-0.48359	-0.00169206	0.526686	0.907403	-0.0354738	0.594946	podocalyxin-like (PODXL), transcript variant 1, mRNA.
ILMN_1762932	CHMP2A	27243	-0.277122	0.054272	0.425506	0.855078	-0.0735309	0.248632	0.652859	0.0330316	0.227421	0.757251	0.107465	0.0953286	0.286409	-0.00221024	0.592647	0.926126	0.0463926	0.486748	chromatin modifying protein 2A (CHMP2A), transcript variant 2, mRNA.
ILMN_3178792	HNRNPA2B1	3181	0.184856	0.0565071	0.271558	0.762988	0.0465088	0.465931	0.268659	0.0313211	0.308068	0.814973	0.0935531	0.146782	0.120906	-0.00254551	0.645093	0.941362	0.0070301	0.916109	heterogeneous nuclear ribonucleoprotein A2/B1 (HNRNPA2B1), transcript variant B1, mRNA.
ILMN_1773865	HSPA5	3309	-0.379422	0.0558613	0.307144	0.788478	-0.047724	0.454347	-0.481547	0.0299971	0.397492	0.857879	-0.0690329	0.284792	-0.670231	0.00269464	0.241309	0.76524	-0.0700779	0.293123	heat shock 70kDa protein 5 (glucose-regulated protein, 78kDa) (HSPA5), mRNA.
ILMN_2124241	MUM1L1	139221	-0.0573259	0.0521073	0.776452	0.963096	-0.00248729	0.968913	-0.184888	0.0285805	0.542593	0.911273	-0.0553789	0.391063	-0.364479	0.00263889	0.243443	0.766555	-0.0667309	0.316843	melanoma associated antigen (mutated) 1-like 1 (MUM1L1), mRNA.
ILMN_1761566	C5orf32	84418	0.00643119	0.0518023	0.959273	0.992652	-0.0164076	0.797103	-0.112543	0.028427	0.563662	0.917264	-0.0159862	0.804587	-0.227723	0.00261034	0.244544	0.767929	-0.0464551	0.486161	chromosome 5 open reading frame 32 (C5orf32), mRNA.
ILMN_1774410	HSPD1	3329	0.061838	0.0518397	0.912088	0.986304	0.00423112	0.947143	-0.904265	0.0314966	0.298301	0.807795	-0.0462098	0.47429	1.0196	0.0024232	0.251915	0.774234	0.108636	0.10256	heat shock 60kDa protein 1 (chaperonin) (HSPD1), nuclear gene encoding mitochondrial protein, transcript variant 2, mRNA.
ILMN_1734814	HSPA4	3308	-0.10991	0.0521297	0.768866	0.961406	-0.0288059	0.651674	0.67687	0.0325152	0.24869	0.776257	0.0413135	0.522411	0.356866	-0.00185035	0.545312	0.911982	0.021394	0.748521	heat shock 70kDa protein 4 (HSPA4), mRNA.
ILMN_2395043	HSPA4	3308	0.208941	0.0546176	0.394939	0.840313	0.0874157	0.169971	0.0717046	0.027208	0.847786	0.978865	0.00915988	0.88727	0.436989	0.00213016	0.264013	0.781551	0.0938007	0.158967	heat shock 70kDa protein 4 (HSPA4), transcript variant 2, mRNA.
ILMN_1740265	ACOT7	11332	-0.190208	0.0527287	0.624447	0.925848	0.0048259	0.939726	0.434626	0.0292216	0.46791	0.886151	0.0147462	0.819474	0.67831	0.00195884	0.271418	0.786462	0.0360395	0.589082	acyl-CoA thioesterase 7 (ACOT7), transcript variant hBACHb, mRNA.
ILMN_1657111	AHNAK2	113146	-0.157238	0.0532424	0.542348	0.900623	-0.00285903	0.964269	-0.0561027	0.0271422	0.885187	0.984712	-0.00494362	0.939016	0.426236	0.00183151	0.277089	0.790496	0.0687488	0.302397	PREDICTED: chromosome 14 open reading frame 78 (C14orf78), mRNA.
ILMN_1704164	ATP13A2	23400	-0.546551	0.0557776	0.31218	0.792105	-0.0583632	0.360065	-0.400579	0.0279662	0.638083	0.936751	-0.0522614	0.418319	-0.0318455	-0.00349914	0.968611	0.997539	-0.00825712	0.901536	ATPase type 13A2 (ATP13A2), mRNA.
ILMN_2396648	EXOSC1	51013	-0.0260712	0.0518506	0.902616	0.985174	0.00401358	0.949857	0.357336	0.032018	0.271505	0.792495	0.069841	0.279178	-0.288584	0.000159543	0.367943	0.843096	-0.0635155	0.340774	exosome component 1 (EXOSC1), mRNA. XM_944315 XM_944318 XM_944323
ILMN_2212763	ICAM3	3385	0.100997	0.0532274	0.544453	0.901458	0.0663064	0.29831	-0.277477	0.0319436	0.275133	0.793956	-0.158198	0.0137482	-0.126907	-0.00235492	0.614095	0.93286	-0.0836708	0.209163	intercellular adhesion molecule 3 (ICAM3), mRNA.
ILMN_1810608	PNPT1	87178	-0.344569	0.0555657	0.325427	0.800716	-0.057495	0.367268	-0.519843	0.0309002	0.333257	0.826346	-0.0316342	0.624356	-0.3396	-0.00164518	0.521388	0.906322	-0.0225425	0.73551	polyribonucleotide nucleotidyltransferase 1 (PNPT1), mRNA.
ILMN_1704961	ACTG1	71	0.0300303	0.0520319	0.804396	0.969361	0.020925	0.742988	0.0371244	0.0272221	0.840948	0.977569	0.0486778	0.450984	0.194707	0.00151015	0.29208	0.801172	0.0560689	0.400481	actin, gamma 1 (ACTG1), mRNA.
ILMN_1806165	HSPA6	3310	-0.258053	0.055489	0.330404	0.803604	-0.0921125	0.148083	0.277132	0.0290302	0.488297	0.893814	0.0219997	0.733477	0.0521555	-0.00343381	0.899442	0.988952	-0.0106911	0.872729	heat shock 70kDa protein 6 (HSP70B') (HSPA6), mRNA.
ILMN_1810387	PLAA	9373	-0.0927239	0.0520202	0.809147	0.969909	-0.0176121	0.782567	-0.635157	0.0315806	0.293765	0.806018	-0.0243984	0.705697	0.169011	-0.00315941	0.782028	0.96995	0.0426295	0.522808	phospholipase A2-activating protein (PLAA), transcript variant 1, mRNA.
ILMN_1740938	APOE	348	-0.00389032	0.0517941	0.981714	0.996732	0.0134529	0.833046	-0.26879	0.0314327	0.30181	0.810328	-0.0659113	0.307188	0.146085	-0.00210683	0.578243	0.922224	0.00638788	0.923749	apolipoprotein E (APOE), mRNA.
ILMN_2384544	ADAM15	8751	-0.172728	0.0535965	0.496732	0.884312	-0.0341467	0.592524	0.397031	0.0313275	0.307704	0.814538	0.0256063	0.691852	0.00857333	-0.00350401	0.982641	0.999083	-0.0033763	0.959654	ADAM metallopeptidase domain 15 (ADAM15), transcript variant 2, mRNA.
ILMN_2109994	RAB4B,MIA-RAB4B	53916	-0.00131205	0.0517921	0.997946	0.999572	0.0423615	0.506666	0.789322	0.0312695	0.311022	0.816878	0.0390748	0.545215	-0.137757	-0.00336274	0.858778	0.982164	-0.0475242	0.476171	RAB4B, member RAS oncogene family (RAB4B), mRNA.
ILMN_1671703	ACTA2	59	-0.0347399	0.0545521	0.400474	0.842434	-0.0423083	0.5072	-0.0636559	0.0312151	0.314172	0.817994	-0.0718925	0.265263	-0.0196927	-0.00307949	0.758908	0.965088	0.00509881	0.939103	actin, alpha 2, smooth muscle, aorta (ACTA2), mRNA.
ILMN_2052335	MYOC	4653	-0.0206965	0.0519963	0.819199	0.971141	0.0162101	0.799493	0.109285	0.0296458	0.42726	0.870153	0.0311904	0.629228	0.137179	0.000997259	0.318217	0.818587	0.0813829	0.221929	myocilin, trabecular meshwork inducible glucocorticoid response (MYOC), mRNA.
ILMN_2296510	SLC5A12	159963	-0.0181575	0.0517966	0.972896	0.995358	-0.0182997	0.774302	0.334277	0.0277518	0.680921	0.947157	0.0304746	0.637121	-0.830052	0.000915258	0.322673	0.821274	-0.0758252	0.255223	solute carrier family 5 (sodium/glucose cotransporter), member 12 (SLC5A12), transcript variant 1, mRNA.
ILMN_1747146	TSG101	7251	0.117833	0.0527348	0.623337	0.925317	0.0321027	0.614873	-0.267637	0.0292519	0.46481	0.884752	-0.0859148	0.182839	-0.356529	0.000719184	0.333667	0.827443	-0.0721302	0.279181	tumor susceptibility gene 101 (TSG101), mRNA.
ILMN_2124769	YBX1	4904	0.104068	0.0526914	0.631447	0.927786	0.0585421	0.358592	0.107564	0.0274607	0.753877	0.962443	0.0109109	0.865907	-0.323975	0.000655573	0.33734	0.829147	-0.0481294	0.470566	Y box binding protein 1 (YBX1), mRNA.
ILMN_3235632	ANXA2P2	304	0.088411	0.0521001	0.778935	0.963147	0.0538531	0.398441	-0.459808	0.0307689	0.341673	0.830372	-0.0761733	0.237778	-0.143597	-0.00313577	0.774915	0.967862	-0.0573391	0.389878	annexin A2 pseudogene 2 (ANXA2P2), non-coding RNA.
ILMN_2345908	DDX11	1663	0.273026	0.0546907	0.388881	0.838174	0.0700192	0.272012	0.271795	0.0283142	0.580182	0.921959	0.0207888	0.747635	-0.0314549	-0.00348768	0.949081	0.995115	-0.0239383	0.7198	DEAD/H (Asp-Glu-Ala-Asp/His) box polypeptide 11 (CHL1-like helicase homolog, S. cerevisiae) (DDX11), transcript variant 1, mRNA.
ILMN_1734550	SLC9A3	6550	0.450099	0.0546618	0.391259	0.838947	0.0374239	0.557485	0.227097	0.0273713	0.782022	0.969086	0.0229721	0.722171	0.402275	-0.00241698	0.623816	0.935514	0.032812	0.622885	solute carrier family 9 (sodium/hydrogen exchanger), member 3 (SLC9A3), mRNA.
ILMN_2193980	ABCB6	10058	-0.125275	0.053433	0.516921	0.892108	-0.0610789	0.33811	-0.272125	0.0304945	0.360196	0.839895	-0.0441479	0.494255	0.0554928	-0.00334636	0.851021	0.980784	0.0293079	0.660499	ATP-binding cassette, sub-family B (MDR/TAP), member 6 (ABCB6), nuclear gene encoding mitochondrial protein, mRNA.
ILMN_1755134	HSPA4	3308	-0.233693	0.05458	0.398099	0.841779	-0.0831597	0.191809	-0.0407537	0.0270951	0.92276	0.991098	-0.0213998	0.740481	-0.194032	-0.00254709	0.645366	0.94145	-0.0183814	0.78298	heat shock 70kDa protein 4 (HSPA4), mRNA.
ILMN_1671326	EIF2C1	26523	0.183219	0.0524957	0.671368	0.939201	0.0403777	0.52679	0.590085	0.0303396	0.371268	0.845448	0.0462174	0.474218	-0.451644	-0.00145912	0.501246	0.900329	-0.0490943	0.461706	eukaryotic translation initiation factor 2C, 1 (EIF2C1), mRNA.
ILMN_1748386	MB	4151	0.0413352	0.0522041	0.745438	0.955645	0.0488361	0.443889	-0.169244	0.0301877	0.382583	0.850997	-0.0635328	0.325009	0.0558278	-0.0031489	0.778833	0.968818	-0.0206815	0.756629	myoglobin (MB), transcript variant 3, mRNA.
ILMN_2270845	WDR74	54663	0.0669848	0.0520049	0.815524	0.970465	0.015786	0.804631	0.319963	0.0291944	0.470728	0.886841	0.0415234	0.520298	0.373385	-0.000125139	0.387256	0.851794	0.041623	0.532679	WD repeat domain 74 (WDR74), mRNA.
ILMN_3251723	PNPT1	87178	-0.0984856	0.0535697	0.499954	0.886083	-0.0361977	0.570478	0.112708	0.0281141	0.612013	0.932048	0.0197088	0.760336	0.189715	-0.000161162	0.389801	0.852862	0.0454728	0.495437	polyribonucleotide nucleotidyltransferase 1 (PNPT1), mRNA.
ILMN_1712636	NVL	4931	-0.188719	0.0524464	0.682441	0.942408	-0.0394616	0.536217	-0.605752	0.0300621	0.392317	0.85514	-0.0486487	0.451255	0.17417	-0.00324936	0.811806	0.974395	0.00267406	0.96804	nuclear VCP-like (NVL), transcript variant 2, mRNA.
ILMN_2052331	MYOC	4653	-0.102928	0.0541962	0.43268	0.858741	-0.0101195	0.874015	0.16699	0.0299108	0.404518	0.861042	0.0371238	0.565481	0.159388	-0.00066892	0.428406	0.870192	0.0516909	0.438328	myocilin, trabecular meshwork inducible glucocorticoid response (MYOC), mRNA.
ILMN_1756779	CLTC	1213	-0.343253	0.054132	0.4389	0.860861	-0.0622682	0.32877	-0.549035	0.0297424	0.418756	0.867941	-0.0623806	0.333878	0.327737	-0.00240996	0.622699	0.935258	0.0115975	0.862042	clathrin, heavy chain (Hc) (CLTC), mRNA.
ILMN_1770293	KLF5	688	0.325219	0.0540727	0.444762	0.863291	0.0553542	0.385405	-0.146611	0.0272633	0.822523	0.97676	-0.0156683	0.808398	0.490471	-0.00106038	0.462222	0.885871	0.0387351	0.561511	Kruppel-like factor 5 (intestinal) (KLF5), mRNA.
ILMN_1714511	PARK2	5071	-0.23419	0.0540053	0.451583	0.866172	-0.063759	0.317299	-0.33569	0.0290961	0.481123	0.891154	-0.00217778	0.973114	-0.291766	-0.00188593	0.549665	0.913471	-0.00706961	0.91564	Parkinson disease (autosomal recessive, juvenile) 2, parkin (PARK2), transcript variant 1, mRNA.
ILMN_2395692	PARK2	5071	-0.241731	0.0530148	0.575903	0.911498	-0.0306819	0.630622	-0.534182	0.0296861	0.42368	0.869036	-0.0163059	0.800761	0.173916	-0.00322216	0.802288	0.973005	0.0230196	0.730128	Parkinson disease (autosomal recessive, juvenile) 2, parkin (PARK2), transcript variant 2, mRNA.
ILMN_1736700	ALDOA	226	0.100078	0.0531417	0.556723	0.904807	0.0247793	0.697784	-0.214683	0.0296805	0.424171	0.869096	-0.0821274	0.202969	0.0400338	-0.00340475	0.881067	0.98527	-0.0589488	0.376686	aldolase A, fructose-bisphosphate (ALDOA), transcript variant 2, mRNA.
ILMN_1776857	AQP1	358	0.174031	0.0528116	0.609521	0.921662	0.0473979	0.45744	-0.413692	0.0296496	0.42692	0.870075	-0.0252092	0.696393	-0.0289384	-0.00349257	0.956324	0.995732	0.0212165	0.750538	aquaporin 1 (Colton blood group) (AQP1), mRNA.
ILMN_2089073	ATP9A	10079	-0.0626502	0.0529107	0.592639	0.916636	-0.0564516	0.37604	-0.144306	0.0296425	0.427556	0.870153	-0.00336319	0.95849	0.0814153	-0.00254263	0.644598	0.941349	0.0407854	0.540964	ATPase, class II, type 9A (ATP9A), mRNA.
ILMN_1784367	HSPD1	3329	0.223339	0.0534007	0.521083	0.892965	0.0368779	0.563253	0.417243	0.0296012	0.431274	0.871242	0.0398838	0.536918	-0.228264	-0.00270963	0.674934	0.948222	0.00131266	0.984308	heat shock 60kDa protein 1 (chaperonin) (HSPD1), nuclear gene encoding mitochondrial protein, transcript variant 1, mRNA.
ILMN_2075507	MAN1A2	10905	0.380609	0.0538928	0.463325	0.871356	0.0681748	0.284872	-0.267563	0.0275171	0.737866	0.958786	-0.0445124	0.490693	-0.640151	-0.000718701	0.432492	0.872406	-0.0527159	0.429288	mannosidase, alpha, class 1A, member 2 (MAN1A2), mRNA.
ILMN_1699525	SRI	6717	0.205166	0.0535932	0.497122	0.884576	0.039659	0.534178	-0.193487	0.0277531	0.680642	0.94715	-0.0146154	0.821049	-0.271611	-0.00197831	0.561279	0.917049	-0.0125768	0.850525	sorcin (SRI), transcript variant 2, mRNA.
ILMN_1731135	RAB11B	9230	-0.258945	0.0526758	0.63442	0.929101	-0.0134172	0.833484	0.607083	0.0292381	0.466218	0.885552	0.0515281	0.424889	0.0549978	-0.003487	0.948152	0.995107	0.0223753	0.7374	RAB11B, member RAS oncogene family (RAB11B), mRNA.
ILMN_1695157	CA4	762	0.0385383	0.0520344	0.80338	0.969083	0.000568816	0.992889	0.0493731	0.027234	0.835391	0.977283	0.00149236	0.981574	-0.173815	-0.00108382	0.464379	0.886727	-0.0424633	0.524432	carbonic anhydrase IV (CA4), mRNA.
ILMN_2053178	ACTG1	71	0.120748	0.0531535	0.555009	0.904223	0.0392507	0.5384	-0.0839659	0.0273553	0.787495	0.970438	-0.0112991	0.861183	0.125997	-0.00275998	0.684809	0.95165	0.0113313	0.865179	actin, gamma 1 (ACTG1), mRNA.
ILMN_2400219	SRI	6717	0.17114	0.0531409	0.556849	0.904864	0.0627539	0.325004	0.168935	0.0276302	0.708753	0.952471	0.0375367	0.561163	-0.10204	-0.0032764	0.821816	0.976173	0.00169174	0.979777	sorcin (SRI), transcript variant 1, mRNA.
ILMN_1814998	POTEKP	440915	-0.0441041	0.0525393	0.661947	0.93688	-0.013366	0.83411	0.0981766	0.0286926	0.528087	0.905476	0.0656263	0.309288	-0.0546059	-0.00295083	0.726221	0.959117	-0.0264666	0.691642	actin-like protein (FKSG30), mRNA.
ILMN_3241758	POTEF	728378	-0.0447562	0.052788	0.613688	0.922351	-0.023019	0.718309	0.017459	0.0271244	0.897693	0.986751	0.0117056	0.856243	-0.0838001	-0.00177506	0.536306	0.909718	-0.0680753	0.307169	POTE ankyrin domain family, member F (POTEF), mRNA.
ILMN_1677483	EXOSC1	51013	0.0712156	0.0520237	0.807682	0.969623	0.0316421	0.61996	0.27301	0.0285501	0.546645	0.913094	0.0984706	0.126605	0.0787269	-0.00337228	0.863509	0.982703	0.0611001	0.359488	PREDICTED: exosome component 1 (EXOSC1), mRNA.
ILMN_1677824	SPHAR,RAB4A	5867	-0.0346984	0.0518663	0.890397	0.982787	-0.0368314	0.563745	-0.228365	0.0284978	0.55375	0.914202	-0.00182766	0.977435	-0.175666	-0.00251967	0.640682	0.939833	0.0113513	0.864943	RAB4A, member RAS oncogene family (RAB4A), mRNA.
ILMN_1651513	SKIV2L2	23517	0.140269	0.0529019	0.594095	0.916942	0.0229702	0.718881	0.132237	0.0274929	0.744602	0.960888	0.0550982	0.393472	0.182847	-0.00260577	0.655668	0.943621	-0.000308801	0.996308	superkiller viralicidic activity 2-like 2 (S. cerevisiae) (SKIV2L2), mRNA.
ILMN_1687785	PPA2	27068	0.0554166	0.0520607	0.793242	0.967156	0.0163466	0.79784	0.108198	0.0274975	0.743313	0.960477	0.0283666	0.6606	-0.187224	-0.00202074	0.566772	0.918791	-0.0650539	0.329184	pyrophosphatase (inorganic) 2 (PPA2), nuclear gene encoding mitochondrial protein, transcript variant 3, mRNA.
ILMN_2052891	PKD2	5311	0.112248	0.052721	0.625877	0.926458	0.0652404	0.306163	-0.198395	0.0283778	0.570751	0.918893	-0.0212816	0.741863	-0.0365654	-0.00345719	0.917193	0.991255	-0.0252478	0.705165	polycystic kidney disease 2 (autosomal dominant) (PKD2), mRNA.
ILMN_1706304	EIF2C4	192670	0.038509	0.0518182	0.934853	0.988626	0.00352108	0.956003	0.236865	0.0275065	0.740788	0.959745	0.0249471	0.699395	-0.407782	-0.00210778	0.578372	0.922224	-0.0343955	0.606195	eukaryotic translation initiation factor 2C, 4 (EIF2C4), mRNA.
ILMN_1667295	VASN	114990	0.0707191	0.0522808	0.723643	0.951937	0.0275487	0.66594	0.0879689	0.027396	0.77385	0.967278	0.0162897	0.800953	0.166511	-0.00218996	0.589765	0.92585	0.0430373	0.518836	vasorin (VASN), mRNA.
ILMN_1777296	ACTB	60	-0.0115723	0.0518622	0.893494	0.983275	-0.00682068	0.914892	-0.0694533	0.0281985	0.598159	0.928232	-0.0286058	0.657919	-0.0445241	-0.00298731	0.73502	0.961209	-0.0109476	0.869703	actin, beta (ACTB), mRNA.
ILMN_1670218	EXOSC6	118460	-0.0974018	0.0526279	0.643773	0.932342	-0.00920333	0.885339	-0.134696	0.0277774	0.675427	0.945378	-0.0372767	0.563881	-0.00277893	-0.00350582	0.993103	0.999645	-0.0137463	0.836811	exosome component 6 (EXOSC6), mRNA.
ILMN_1660436	HSPA1B	3304	-0.0118924	0.0518893	0.874717	0.980697	0.00298963	0.962638	-0.0539411	0.0279295	0.644957	0.938514	-0.000129549	0.9984	-0.0595949	-0.0023599	0.614863	0.933013	-0.0575406	0.388211	heat shock 70kDa protein 1B (HSPA1B), mRNA.
ILMN_1792679	ITGA5	3678	0.0349362	0.0518247	0.927262	0.987576	0.0162589	0.798902	-0.277327	0.0279625	0.638772	0.93703	-0.0534323	0.407954	-0.204111	-0.00298647	0.734812	0.961209	-0.0139725	0.834163	integrin, alpha 5 (fibronectin receptor, alpha polypeptide) (ITGA5), mRNA.
ILMN_1756920	ADAM15	8751	0.0426389	0.0521382	0.766055	0.960748	0.0166404	0.794287	-0.0731699	0.0275033	0.741686	0.95982	-0.0392809	0.543095	-0.105597	-0.00245022	0.629164	0.937377	-0.0167825	0.801447	ADAM metallopeptidase domain 15 (ADAM15), transcript variant 4, mRNA.
ILMN_1656621	CHMP2A	27243	-0.0579882	0.0518948	0.87125	0.98016	-0.0036505	0.954388	-0.0672423	0.0271158	0.904355	0.988173	0.00258972	0.968031	0.24522	-0.00265653	0.664908	0.945981	0.056441	0.397358	chromatin modifying protein 2A (CHMP2A), transcript variant 1, mRNA.
ILMN_3243156	AHNAK2	113146	0.0488859	0.0518602	0.894954	0.983565	0.0296725	0.641914	-0.185831	0.027505	0.741211	0.959781	-0.0176318	0.784939	0.201803	-0.00295569	0.727375	0.95964	0.0159423	0.811196	AHNAK nucleoprotein 2 (AHNAK2), mRNA.
ILMN_1792587	VPS4B	9525	0.0593773	0.0519378	0.846937	0.975572	0.00422836	0.947177	0.152942	0.0274935	0.744441	0.960888	0.0495403	0.442994	0.0945679	-0.00332159	0.840037	0.979397	-0.00252735	0.969793	vacuolar protein sorting 4 homolog B (S. cerevisiae) (VPS4B), mRNA.
ILMN_1773561	RAP2C	57826	-0.0716646	0.05207	0.789755	0.965423	-0.0298137	0.640329	-0.0625909	0.0271503	0.879896	0.983873	-0.0219679	0.733848	0.0216066	-0.0034938	0.958349	0.995892	-0.00810373	0.903356	RAP2C, member of RAS oncogene family (RAP2C), mRNA.
ILMN_1658383	HSPA6	3310	0.0701617	0.0518727	0.885795	0.98218	-0.00649065	0.918995	-0.207426	0.0273743	0.781015	0.968856	0.0126603	0.84466	-0.0120891	-0.00350504	0.987483	0.999275	0.0160331	0.810141	heat shock 70kDa protein 6 (HSP70B') (HSPA6), mRNA.
ILMN_1774287	CFB	629	-0.099853	0.0519615	0.835111	0.974135	-0.00281694	0.964795	-0.127857	0.0271857	0.859286	0.980621	-0.0232134	0.719374	0.194279	-0.00318619	0.790411	0.970849	-0.0413302	0.535568	complement factor B (CFB), mRNA.
ILMN_3244096	ZFC3H1	196441	-0.0828196	0.0519543	0.838611	0.974635	-0.019579	0.758994	0.107413	0.0271745	0.865456	0.982115	0.00642539	0.92079	0.0565159	-0.00346782	0.926706	0.992486	-0.0303308	0.649425	zinc finger, C3H1-type containing (ZFC3H1), mRNA.
ILMN_1697736	EXOSC2	23404	0.00160255	0.0517922	0.995449	0.998909	0.0163907	0.797307	0.0887154	0.0272292	0.837591	0.977427	0.0225128	0.727504	0.0242682	-0.00349211	0.955589	0.995673	0.0485634	0.46657	exosome component 2 (EXOSC2), mRNA.
ILMN_1794213	ABHD14A	25864	0.0475773	0.0519151	0.859195	0.977938	0.00722114	0.909915	-0.0316885	0.0270804	0.939075	0.993333	0.00362188	0.955301	0.0439394	-0.00345577	0.916012	0.991255	0.052308	0.432873	abhydrolase domain containing 14A (ABHD14A), mRNA.
