# Supplementary material for: Genetic regulation of exosome biogenesis pathway in human adipose and muscle tissue and association with obesity and insulin resistance
Source: Research Square preprint supplement (doi:10.21203/rs.3.rs-6580546/v1), 2025-07-11
Supplement: Supplementary file 4 [file 3df7bda504b1c1fa7d45b85e.xlsx]

## Sheet: S.Table-2
Supplementary Table-2: Transcript levels of exosome pathway genes in adipose tissue is associated with obesity and glucometabolic traits in AAGMEx cohort (African Ancestry Americans)
Results from linear regression analysis and Spearman partial correlation analysis for all expressed exosome pathway genes are shown.
Transcript probes associated with glucometabolic traits (q-value <0.05 in linear regression) are shown in bold letters. Some genes are represented by more than one probe.
Probe_Id	Symbol	Entrez Gene ID	BMI beta	BMI adj_R2 full	BMI p-value	BMI q-value	BMI Spearman_partial_corr	BMI Spearman_corr_p value	Matsuda beta	Matsuda adj_R2_full	Matsuda p-value	Matsuda q-value	Matsuda Spearman_partial_corr	Matsuda Spearman_corr_p-value	SI beta	SI adj_R2_full	SI p-value	SI q-value	SI Spearman_partial_corr	SI Spearman_corr_p-value	Definition
ILMN_1677404	RAP2A	5911	1.57215	0.335008	9.80783e-21	6.10331e-18	0.526967	<2.66E-15	-2.07155	0.210683	1.49753e-12	1.67038e-10	-0.434105	9.98979e-13	-1.63589	0.114433	1.20174e-07	1.38284e-05	-0.327579	3.73827e-07	RAP2A, member of RAS oncogene family (RAP2A), mRNA.
ILMN_1714602	CD86	942	1.14735	0.30077	5.01859e-18	1.35941e-15	0.531342	<2.66E-15	-1.80699	0.299099	7.50515e-19	9.5932e-16	-0.544762	<2.66E-15	-1.25494	0.131892	1.19882e-08	2.43813e-06	-0.346577	6.82884e-08	CD86 molecule (CD86), transcript variant 2, mRNA.
ILMN_2052891	PKD2	5311	1.25219	0.287559	5.15083e-17	1.02818e-14	0.499684	<2.66E-15	-1.73392	0.208597	2.06969e-12	2.20957e-10	-0.401926	5.74774e-11	-1.36061	0.116934	8.65661e-08	1.08308e-05	-0.313405	1.23544e-06	polycystic kidney disease 2 (autosomal dominant) (PKD2), mRNA.
ILMN_1806165	HSPA6	3310	0.783498	0.278845	2.34006e-16	4.06879e-14	0.471752	2.66453e-15	-1.0864	0.224531	1.71328e-13	2.50086e-11	-0.405239	3.86195e-11	-0.635708	0.0692159	4.07119e-05	0.00125353	-0.276641	2.08157e-05	heat shock 70kDa protein 6 (HSP70B') (HSPA6), mRNA.
ILMN_1673282	LAMP2	3920	0.793357	0.130384	3.85988e-06	6.241e-05	0.266457	1.88585e-05	-2.13253	0.260285	5.3524e-16	1.82112e-13	-0.451312	9.54792e-14	-1.55869	0.125386	2.84209e-08	4.90561e-06	-0.331045	2.76463e-07	lysosomal-associated membrane protein 2 (LAMP2), transcript variant LAMP2A, mRNA.
ILMN_1683883	ACY1	95	-1.1008	0.261939	4.19999e-15	5.56399e-13	-0.449485	6.92779e-14	1.22181	0.12959	2.59445e-07	6.4956e-06	0.275747	1.14259e-05	1.07589	0.0810632	8.99477e-06	0.00038084	0.210558	0.00131837	aminoacylase 1 (ACY1), mRNA.
ILMN_2070521	BHMT2	23743	0.909903	0.25408	1.57415e-14	1.83369e-12	0.471	2.88658e-15	-1.29121	0.20656	2.8365e-12	2.85666e-10	-0.427199	2.47269e-12	-1.18013	0.162094	2.02872e-10	1.33259e-07	-0.406599	1.43684e-10	betaine-homocysteine methyltransferase 2 (BHMT2), mRNA.
ILMN_1674243	TFRC	7037	0.582621	0.250941	2.65877e-14	2.85133e-12	0.4677	4.88498e-15	-0.796903	0.18199	1.20082e-10	7.70578e-09	-0.418686	7.34879e-12	-0.546946	0.0721822	2.79188e-05	0.000943138	-0.26248	5.57987e-05	transferrin receptor (p90, CD71) (TFRC), mRNA.
ILMN_1714567	AHNAK	79026	1.26108	0.245147	6.95724e-14	6.79826e-12	0.44197	1.99618e-13	-1.5168	0.155699	5.93687e-09	2.3896e-07	-0.31764	3.59928e-07	-1.41016	0.111631	1.734e-07	1.80968e-05	-0.330741	2.83927e-07	AHNAK nucleoprotein (AHNAK), transcript variant 1, mRNA.
ILMN_1710740	C2	717	1.56045	0.242031	1.16378e-13	1.08133e-11	0.466286	5.77316e-15	-2.35481	0.219004	4.08735e-13	5.2595e-11	-0.456082	4.84057e-14	-1.37712	0.0653733	6.63229e-05	0.00181836	-0.255151	9.09872e-05	complement component 2 (C2), mRNA.
ILMN_1813043	BHMT2	23743	0.912294	0.240312	1.54443e-13	1.40196e-11	0.438651	3.15747e-13	-1.33024	0.19135	2.91727e-11	2.20047e-09	-0.413139	1.47016e-11	-1.17468	0.137245	5.86925e-09	1.46868e-06	-0.374371	4.59461e-09	betaine-homocysteine methyltransferase 2 (BHMT2), mRNA.
ILMN_2411282	QSOX1	5768	1.35142	0.235758	3.25917e-13	2.75741e-11	0.464769	7.54952e-15	-1.83795	0.162633	2.14372e-09	9.65572e-08	-0.432787	1.18949e-12	-1.45385	0.0863241	4.58601e-06	0.000220866	-0.293714	5.88608e-06	quiescin Q6 sulfhydryl oxidase 1 (QSOX1), transcript variant 2, mRNA.
ILMN_1766713	HSPD1	3329	-1.18385	0.229658	8.80638e-13	6.76118e-11	-0.432093	7.70051e-13	1.61167	0.161819	2.41686e-09	1.07529e-07	0.375395	1.18895e-09	1.34692	0.0949857	1.50521e-06	9.65906e-05	0.309612	1.68378e-06	heat shock 60kDa protein 1 (chaperonin) (HSPD1), nuclear gene encoding mitochondrial protein, transcript variant 1, mRNA.
ILMN_1659753	LAMP2	3920	0.78432	0.118395	2.24233e-05	0.000296143	0.223574	0.000357406	-2.02277	0.208499	2.10123e-12	2.23819e-10	-0.367143	2.88967e-09	-1.50639	0.107386	3.0172e-07	2.73887e-05	-0.288229	8.91175e-06	lysosomal-associated membrane protein 2 (LAMP2), transcript variant LAMP2B, mRNA.
ILMN_1756982	CLIC1	1192	1.09323	0.21333	1.21678e-11	7.23855e-10	0.439647	2.75335e-13	-1.78832	0.201996	5.73208e-12	5.29479e-10	-0.451606	9.14824e-14	-1.3037	0.0919121	2.23674e-06	0.000128848	-0.303733	2.69788e-06	chloride intracellular channel 1 (CLIC1), mRNA.
ILMN_2184184	ANXA1	301	0.830829	0.189952	4.80663e-10	2.0315e-08	0.334337	5.71685e-08	-1.45083	0.201279	6.39986e-12	5.82067e-10	-0.400313	6.96367e-11	-0.962055	0.0857957	4.90754e-06	0.000233278	-0.254465	9.51803e-05	annexin A1 (ANXA1), mRNA.
ILMN_3241758	POTEF	728378	0.895315	0.213318	1.21922e-11	7.24395e-10	0.38501	2.71297e-10	-1.37835	0.18749	5.23813e-11	3.65926e-09	-0.393908	1.47753e-10	-1.00162	0.0899935	2.86291e-06	0.000153513	-0.276792	2.05918e-05	POTE ankyrin domain family, member F (POTEF), mRNA.
ILMN_1742187	MAN1A1	4121	0.738915	0.140184	9.07232e-07	1.73086e-05	0.305359	8.1413e-07	-2.07807	0.1946	1.77874e-11	1.42824e-09	-0.351034	1.52415e-08	-1.60717	0.105136	4.04317e-07	3.44536e-05	-0.306862	2.1019e-06	mannosidase, alpha, class 1A, member 1 (MAN1A1), mRNA.
ILMN_2381397	HSPD1	3329	-1.23379	0.200098	9.86262e-11	4.85372e-09	-0.380825	4.37548e-10	1.7354	0.141844	4.45518e-08	1.3917e-06	0.328439	1.34868e-07	1.36674	0.0704178	3.49437e-05	0.00112118	0.248276	0.000142081	heat shock 60kDa protein 1 (chaperonin) (HSPD1), nuclear gene encoding mitochondrial protein, transcript variant 1, mRNA.
ILMN_1698225	MYO5A	4644	1.38608	0.197196	1.55414e-10	7.30633e-09	0.400134	4.554e-11	-1.9291	0.133928	1.39331e-07	3.7849e-06	-0.33804	5.45502e-08	-1.61059	0.080264	9.96209e-06	0.000412925	-0.284492	1.17642e-05	myosin VA (heavy chain 12, myoxin) (MYO5A), mRNA.
ILMN_1695423	CD9	928	0.6866	0.192768	3.10242e-10	1.36871e-08	0.386297	2.33907e-10	-0.776222	0.106606	6.75358e-06	0.000112466	-0.314569	4.72525e-07	-0.381166	0.0158983	0.0373896	0.202323	-0.126499	0.0554037	CD9 molecule (CD9), mRNA.
ILMN_2152131	ACTB	60	0.760682	0.15234	1.48306e-07	3.52993e-06	0.308835	6.00746e-07	-1.56967	0.176247	2.84077e-10	1.62456e-08	-0.377116	9.84762e-10	-1.05162	0.0694085	3.97277e-05	0.00123206	-0.21505	0.00103036	actin, beta (ACTB), mRNA.
ILMN_2124951	RBMX	27316	-1.01979	0.126017	7.33668e-06	0.000110644	-0.259884	3.06436e-05	2.64004	0.175137	3.35346e-10	1.86587e-08	0.420692	5.70055e-12	1.89253	0.0785699	1.23687e-05	0.000494057	0.308466	1.84736e-06	RNA binding motif protein, X-linked (RBMX), mRNA.
ILMN_1658383	HSPA6	3310	2.84347	0.187029	7.56252e-10	3.04652e-08	0.37907	5.3363e-10	-3.81082	0.137382	8.48052e-08	2.45158e-06	-0.311355	6.26246e-07	-1.97635	0.0267434	0.00901223	0.0752234	-0.151459	0.0215759	heat shock 70kDa protein 6 (HSP70B') (HSPA6), mRNA.
ILMN_2124769	YBX1	4904	1.11202	0.139221	1.04645e-06	1.95539e-05	0.282631	5.4046e-06	-2.30584	0.169915	7.29796e-10	3.69144e-08	-0.397007	1.02885e-10	-1.36029	0.0490329	0.000525824	0.00887836	-0.200561	0.00224164	Y box binding protein 1 (YBX1), mRNA.
ILMN_1695157	CA4	762	-0.523436	0.184959	1.04153e-09	4.04417e-08	-0.343501	2.3263e-08	0.769494	0.12894	2.8472e-07	7.04266e-06	0.301464	1.45935e-06	0.501345	0.0431171	0.00111298	0.01582	0.176712	0.00721963	carbonic anhydrase IV (CA4), mRNA.
ILMN_1773865	HSPA5	3309	0.984139	0.174138	5.49009e-09	1.82209e-07	0.36182	3.52731e-09	-1.26775	0.116453	1.68239e-06	3.35159e-05	-0.345947	2.52829e-08	-0.864766	0.0400869	0.00163521	0.0212058	-0.223913	0.000624276	heat shock 70kDa protein 5 (glucose-regulated protein, 78kDa) (HSPA5), mRNA.
ILMN_2216852	PGK1	5230	1.22127	0.173572	5.98616e-09	1.96467e-07	0.351777	1.00695e-08	-1.93644	0.154565	7.00889e-09	2.76232e-07	-0.388393	2.78759e-10	-1.42619	0.0722596	2.76449e-05	0.000935891	-0.243758	0.000189137	phosphoglycerate kinase 1 (PGK1), mRNA.
ILMN_2409167	ANXA2	302	0.600019	0.112433	5.35835e-05	0.000635769	0.233786	0.000186004	-1.48334	0.151976	1.02304e-08	3.83087e-07	-0.365272	3.52209e-09	-1.20084	0.085695	4.97132e-06	0.000235447	-0.308587	1.82937e-06	annexin A2 (ANXA2), transcript variant 1, mRNA.
ILMN_2053178	ACTG1	71	1.32673	0.152341	1.48297e-07	3.52993e-06	0.333011	6.49531e-08	-2.32209	0.147832	1.8705e-08	6.46661e-07	-0.327983	1.40685e-07	-1.61455	0.0560473	0.000216303	0.00452246	-0.195637	0.00288565	actin, gamma 1 (ACTG1), mRNA.
ILMN_1799728	ADAM15	8751	-1.86205	0.122563	1.21793e-05	0.00017282	-0.26722	1.78102e-05	4.22804	0.147564	1.94486e-08	6.6556e-07	0.34564	2.60603e-08	3.68835	0.0981064	1.00589e-06	6.95507e-05	0.254421	9.54554e-05	PREDICTED: ADAM metallopeptidase domain 15 (metargidin) (ADAM15), mRNA.
ILMN_1774287	CFB	629	0.595702	0.160145	4.59088e-08	1.22184e-06	0.344281	2.15187e-08	-0.907792	0.140024	5.79499e-08	1.75012e-06	-0.352543	1.30945e-08	-0.465243	0.0296357	0.00620921	0.0569423	-0.203646	0.00190782	complement factor B (CFB), mRNA.
ILMN_1651513	SKIV2L2	23517	-0.66462	0.0880162	0.00188911	0.013826	-0.180992	0.0040155	2.371	0.136425	9.73296e-08	2.76131e-06	0.327959	1.40989e-07	1.4228	0.041372	0.00138894	0.0187254	0.190778	0.00368126	superkiller viralicidic activity 2-like 2 (S. cerevisiae) (SKIV2L2), mRNA.
ILMN_1743357	XPNPEP2	7512	1.58138	0.119032	2.04289e-05	0.000272542	0.251139	5.73162e-05	-3.03611	0.134222	1.33582e-07	3.6476e-06	-0.278084	9.55594e-06	-1.44568	0.0236483	0.0134603	0.10014	-0.164062	0.0127215	X-prolyl aminopeptidase (aminopeptidase P) 2, membrane-bound (XPNPEP2), mRNA.
ILMN_2038777	ACTB	60	0.481847	0.113246	4.75854e-05	0.000572793	0.231938	0.000209792	-1.12358	0.133642	1.4518e-07	3.92576e-06	-0.314814	4.62438e-07	-0.68124	0.0405757	0.00153675	0.0201958	-0.18745	0.00433545	actin, beta (ACTB), mRNA.
ILMN_1761049	EIF2C3	192669	-2.6118	0.150895	1.84101e-07	4.28487e-06	-0.309958	5.44066e-07	3.30429	0.0916756	5.47603e-05	0.000692657	0.210641	0.000886306	2.06896	0.0234698	0.0137767	0.101901	0.156064	0.0178623	eukaryotic translation initiation factor 2C, 3 (EIF2C3), transcript variant 2, mRNA.
ILMN_1755937	ANXA2	302	0.654346	0.100454	0.000307265	0.00291511	0.206617	0.000992347	-1.42595	0.130682	2.2189e-07	5.67862e-06	-0.34448	2.92073e-08	-1.32947	0.0949914	1.50411e-06	9.65906e-05	-0.336353	1.72906e-07	annexin A2 (ANXA2), transcript variant 2, mRNA.
ILMN_1752351	LAMP2	3920	1.10439	0.137363	1.37787e-06	2.48722e-05	0.270919	1.34647e-05	-1.99347	0.129422	2.65757e-07	6.64463e-06	-0.28417	5.95356e-06	-1.13664	0.0307368	0.00539078	0.0514949	-0.0992809	0.13331	lysosomal-associated membrane protein 2 (LAMP2), transcript variant LAMP2B, mRNA.
ILMN_1792495	AHNAK	79026	0.491569	0.145263	4.26634e-07	9.03593e-06	0.312398	4.38116e-07	-0.767148	0.122323	7.3141e-07	1.61e-05	-0.334669	7.52186e-08	-0.533933	0.0466181	0.00071401	0.0112987	-0.206382	0.00165046	AHNAK nucleoprotein (AHNAK), transcript variant 1, mRNA.
ILMN_1807300	PKD2	5311	0.670455	0.131433	3.30721e-06	5.44797e-05	0.282528	5.44917e-06	-2.06965	0.126324	4.13634e-07	9.80571e-06	-0.318614	3.29938e-07	-1.87574	0.0900285	2.85008e-06	0.000153172	-0.279725	1.66702e-05	polycystic kidney disease 2 (autosomal dominant) (PKD2), mRNA.
ILMN_1814998	POTEKP	440915	0.486861	0.142177	6.74987e-07	1.34017e-05	0.288811	3.2823e-06	-0.678314	0.0915923	5.5401e-05	0.000699262	-0.223614	0.000408943	-0.415236	0.0227688	0.0150943	0.108888	-0.134964	0.0408499	actin-like protein (FKSG30), mRNA.
ILMN_1744381	SERPINE1	5054	1.06859	0.141976	6.95472e-07	1.37068e-05	0.338072	3.97682e-08	-1.67189	0.112204	3.06773e-06	5.65194e-05	-0.323941	2.03926e-07	-0.903485	0.0203441	0.020733	0.136074	-0.207959	0.001517	serpin peptidase inhibitor, clade E (nexin, plasminogen activator inhibitor type 1), member 1 (SERPINE1), mRNA.
ILMN_1779182	TMEM98	26022	0.688948	0.134441	2.12231e-06	3.66977e-05	0.300847	1.201e-06	-1.19437	0.121595	8.11133e-07	1.76214e-05	-0.333394	8.4858e-08	-0.445105	0.0105511	0.0775252	0.316142	-0.153032	0.0202388	transmembrane protein 98 (TMEM98), transcript variant 2, mRNA.
ILMN_1736597	TKT	7086	-0.590991	0.13557	1.79619e-06	3.16266e-05	-0.281148	6.0807e-06	0.545959	0.0493856	0.0209477	0.101861	0.114254	0.0736559	0.439502	0.0112268	0.0705836	0.299415	0.0702927	0.288442	transketolase (Wernicke-Korsakoff syndrome) (TKT), mRNA.
ILMN_1713995	SCNN1A	6337	1.44202	0.134151	2.21494e-06	3.81616e-05	0.398385	5.62439e-11	-1.92525	0.0933163	4.35379e-05	0.000568179	-0.371669	1.7809e-09	-0.638197	0.00449193	0.186454	0.510612	-0.198253	0.0025251	sodium channel, nonvoltage-gated 1 alpha (SCNN1A), mRNA.
ILMN_2243687	LAMP2	3920	0.372791	0.133574	2.41194e-06	4.10326e-05	0.299568	1.33936e-06	-0.558794	0.0996112	1.80361e-05	0.000263433	-0.290283	3.66031e-06	-0.306783	0.020446	0.0204572	0.134863	-0.171709	0.00907224	lysosomal-associated membrane protein 2 (LAMP2), transcript variant LAMP2A, mRNA.
ILMN_1655913	NUCB2	4925	0.343507	0.0897528	0.00146493	0.0111386	0.197713	0.00164474	-1.6348	0.113755	2.46436e-06	4.67131e-05	-0.320695	2.73697e-07	-1.16243	0.0471366	0.000668609	0.0107311	-0.244013	0.000186134	nucleobindin 2 (NUCB2), mRNA.
ILMN_2371911	MUC1	4582	2.25491	0.131124	3.46132e-06	5.66826e-05	0.303001	9.98356e-07	-3.34119	0.104604	8.94899e-06	0.000143713	-0.297287	2.06685e-06	-1.20928	0.0075842	0.117986	0.401585	-0.0946687	0.152397	mucin 1, cell surface associated (MUC1), transcript variant 5, mRNA.
ILMN_2229839	RAP2B	5912	2.39938	0.130222	3.95317e-06	6.3744e-05	0.281559	5.8855e-06	-2.5803	0.0651173	0.00223654	0.0164989	-0.203687	0.00131734	-0.581637	-0.00106082	0.480964	0.779053	-0.0526598	0.426715	RAP2B, member of RAS oncogene family (RAP2B), mRNA.
ILMN_1750008	SUPV3L1	6832	-1.56951	0.128818	4.86067e-06	7.64739e-05	-0.265554	2.01736e-05	2.43008	0.0769895	0.000425152	0.00402069	0.206976	0.00109392	2.33751	0.0442065	0.00096934	0.01418	0.195335	0.00293009	suppressor of var1, 3-like 1 (S. cerevisiae) (SUPV3L1), mRNA.
ILMN_2279961	LAMP2	3920	0.719388	0.12671	6.6272e-06	0.000100878	0.2616	2.70293e-05	-1.5163	0.109555	4.4582e-06	7.78318e-05	-0.252839	6.05148e-05	-0.875774	0.0251913	0.0110165	0.0869663	-0.0803544	0.224763	lysosomal-associated membrane protein 2 (LAMP2), transcript variant LAMP2B, mRNA.
ILMN_1792679	ITGA5	3678	1.178	0.128008	5.4757e-06	8.50468e-05	0.293021	2.32112e-06	-1.47768	0.07932	0.000307146	0.00304732	-0.210825	0.000876918	-0.291531	-0.00120848	0.495963	0.787778	-0.0735707	0.26649	integrin, alpha 5 (fibronectin receptor, alpha polypeptide) (ITGA5), mRNA.
ILMN_1756992	MUC1	4582	0.976535	0.106311	0.000130866	0.00139239	0.257102	3.74874e-05	-1.81837	0.106583	6.77544e-06	0.000112751	-0.304167	1.16167e-06	-0.690279	0.00866826	0.101029	0.368207	-0.113431	0.0860812	mucin 1, cell surface associated (MUC1), transcript variant 6, mRNA.
ILMN_1686367	HSPA8	3312	0.543714	0.125506	7.90918e-06	0.000118447	0.295549	1.88012e-06	-0.840321	0.103593	1.03149e-05	0.000162286	-0.307016	9.11112e-07	-0.517234	0.0263856	0.00943866	0.0777686	-0.160355	0.0149153	heat shock 70kDa protein 8 (HSPA8), transcript variant 1, mRNA.
ILMN_1747146	TSG101	7251	-1.07514	0.0990289	0.000378202	0.00349622	-0.204421	0.00112621	2.53669	0.105279	8.13942e-06	0.000132193	0.264871	2.56971e-05	1.81394	0.0393649	0.00179238	0.0227139	0.182643	0.0054655	tumor susceptibility gene 101 (TSG101), mRNA.
ILMN_3273854	HNRNPA2B1	3181	-0.799349	0.0931685	0.000889166	0.00727925	-0.197478	0.00166629	1.68826	0.10497	8.50025e-06	0.000137534	0.307231	8.94501e-07	1.01792	0.0283734	0.00730378	0.0642891	0.220667	0.000751701	heterogeneous nuclear ribonucleoprotein A2/B1 (HNRNPA2B1), transcript variant A2, mRNA.
ILMN_1671326	EIF2C1	26523	1.92902	0.124097	9.72524e-06	0.000141609	0.278648	7.4062e-06	-2.89201	0.0967948	2.6761e-05	0.00037159	-0.265277	2.49465e-05	-2.01072	0.0333557	0.00385501	0.0401495	-0.202472	0.00202916	eukaryotic translation initiation factor 2C, 1 (EIF2C1), mRNA.
ILMN_1740938	APOE	348	-0.254175	0.121856	1.35092e-05	0.000189362	-0.306663	7.26693e-07	0.34321	0.0847713	0.000143582	0.00158177	0.189615	0.00282665	0.384073	0.0737232	2.29457e-05	0.000808638	0.262964	5.39993e-05	apolipoprotein E (APOE), mRNA.
ILMN_2169439	ITGAV	3685	0.643659	0.11591	3.22462e-05	0.000407768	0.239669	0.000126002	-1.1159	0.100631	1.56336e-05	0.000233168	-0.253058	5.96018e-05	-0.561798	0.016544	0.0342954	0.191904	-0.128174	0.052224	integrin, alpha V (vitronectin receptor, alpha polypeptide, antigen CD51) (ITGAV), mRNA.
ILMN_1753468	CD63	967	0.877593	0.119963	1.78267e-05	0.000241991	0.233057	0.000195068	-1.14591	0.0745339	0.000598931	0.00542329	-0.229882	0.000276894	-0.907395	0.0253409	0.010805	0.0857693	-0.139804	0.0340824	CD63 molecule (CD63), transcript variant 2, mRNA.
ILMN_2383349	STEAP3	55240	1.02159	0.119476	1.91433e-05	0.000257132	0.234649	0.000175778	-1.06878	0.0597241	0.00477941	0.0310449	-0.224391	0.000389869	-0.717857	0.0115804	0.0672173	0.291035	-0.119939	0.069429	STEAP family member 3 (STEAP3), transcript variant 2, mRNA.
ILMN_2390416	BAG6	7917	-1.28057	0.116691	2.87685e-05	0.000368321	-0.244434	9.12497e-05	1.76295	0.0776918	0.000385471	0.00369861	0.199576	0.00165523	0.925905	0.0113862	0.0690449	0.295612	0.118675	0.0724411	HLA-B associated transcript 3 (BAT3), transcript variant 3, mRNA.
ILMN_2413084	HSPA8	3312	0.505485	0.114556	3.93037e-05	0.000486477	0.272009	1.23895e-05	-0.766594	0.0931825	4.43598e-05	0.000577472	-0.293174	2.89648e-06	-0.438707	0.0194229	0.0234065	0.147796	-0.154384	0.0191473	heat shock 70kDa protein 8 (HSPA8), transcript variant 2, mRNA.
ILMN_1776857	AQP1	358	0.700546	0.11389	4.3319e-05	0.000528538	0.271452	1.29291e-05	-0.893095	0.0739864	0.000646513	0.00578328	-0.17281	0.0065858	-1.00694	0.0555279	0.000231011	0.00473167	-0.233638	0.000352144	aquaporin 1 (Colton blood group) (AQP1), mRNA.
ILMN_1795325	ACTG2	72	-0.136008	0.112882	5.01842e-05	0.000599952	-0.267364	1.76183e-05	0.113793	0.0471692	0.028942	0.130174	0.199305	0.00168006	0.194459	0.0545865	0.000260258	0.00518478	0.246211	0.000162031	actin, gamma 2, smooth muscle, enteric (ACTG2), mRNA.
ILMN_1740351	IST1	9798	-1.21121	0.11281	5.07146e-05	0.000605375	-0.233449	0.000190148	1.77882	0.0825505	0.000195727	0.00206947	0.208395	0.00100877	1.09451	0.0196589	0.0226895	0.144483	0.145125	0.0277638	KIAA0174 (KIAA0174), mRNA.
ILMN_1809751	EIF2C3	192669	-2.41626	0.111949	5.75064e-05	0.000675704	-0.23275	0.000199014	2.37077	0.0520227	0.014312	0.0758229	0.140393	0.027688	2.50723	0.0275395	0.00813227	0.0696281	0.171428	0.00918775	eukaryotic translation initiation factor 2C, 3 (EIF2C3), transcript variant 1, mRNA.
ILMN_1777296	ACTB	60	0.245829	0.0711868	0.0230444	0.106401	0.148268	0.0187591	-0.843157	0.0910729	5.95712e-05	0.000743281	-0.249557	7.58985e-05	-0.424175	0.0130862	0.054675	0.257217	-0.0897054	0.175172	actin, beta (ACTB), mRNA.
ILMN_1747052	ITGA4	3676	1.69759	0.111173	6.44e-05	0.00074632	0.202542	0.00125375	-1.56695	0.0509616	0.0166755	0.0853428	-0.125673	0.048967	-1.67185	0.0246098	0.0118795	0.0917157	-0.0857308	0.195157	integrin, alpha 4 (antigen CD49D, alpha 4 subunit of VLA-4 receptor) (ITGA4), mRNA.
ILMN_1736002	COPS5	10987	-1.12387	0.109301	8.46208e-05	0.000949704	-0.267743	1.71234e-05	1.16762	0.055979	0.00812792	0.0481707	0.152989	0.0163291	1.10407	0.023293	0.0140975	0.103599	0.135707	0.0397427	COP9 constitutive photomorphogenic homolog subunit 5 (Arabidopsis) (COPS5), mRNA.
ILMN_1794213	ABHD14A	25864	-1.0317	0.109078	8.7418e-05	0.000976925	-0.207138	0.000962792	0.977264	0.0455746	0.0366004	0.154469	0.120188	0.0597948	0.921519	0.0133525	0.0527269	0.251378	0.0990146	0.134359	abhydrolase domain containing 14A (ABHD14A), mRNA.
ILMN_1762932	CHMP2A	27243	-1.09199	0.0950605	0.000674603	0.00574238	-0.210381	0.000796408	2.51005	0.0883035	8.7703e-05	0.00104098	0.203837	0.00130633	2.63955	0.0644097	7.49489e-05	0.00200036	0.240121	0.000237205	chromatin modifying protein 2A (CHMP2A), transcript variant 2, mRNA.
ILMN_1769883	IDE	3416	1.55166	0.0983399	0.000418159	0.00380682	0.208001	0.000915643	-2.77327	0.0875514	9.74116e-05	0.00113921	-0.216539	0.000627018	-2.17132	0.0363044	0.00264605	0.0304408	-0.173373	0.00841378	insulin-degrading enzyme (IDE), mRNA.
ILMN_1758229	QSOX1	5768	2.23485	0.107046	0.000117563	0.00126912	0.242307	0.000105474	-2.92408	0.065736	0.00205054	0.0153495	-0.210818	0.000877267	-1.1383	0.00303949	0.233714	0.568731	-0.0742336	0.262193	quiescin Q6 sulfhydryl oxidase 1 (QSOX1), transcript variant 1, mRNA.
ILMN_2395156	PRELP	5549	0.477389	0.0646374	0.0636315	0.223913	0.110513	0.0805542	-1.60552	0.0852826	0.000133697	0.00149058	-0.237645	0.000168314	-0.581828	0.00511727	0.169599	0.486623	-0.0940695	0.155021	proline/arginine-rich end leucine-rich repeat protein (PRELP), transcript variant 2, mRNA.
ILMN_1699525	SRI	6717	-0.708037	0.0845656	0.0031351	0.0211574	-0.178858	0.0044768	1.69398	0.085137	0.000136441	0.0015176	0.224245	0.00039338	0.974343	0.0179968	0.0282654	0.168297	0.147156	0.0256329	sorcin (SRI), transcript variant 2, mRNA.
ILMN_1756779	CLTC	1213	0.267802	0.0784438	0.00774784	0.0447352	0.167604	0.00779227	-1.61354	0.0844698	0.000149752	0.00164438	-0.28445	5.82373e-06	-1.40984	0.0428965	0.00114458	0.0161635	-0.200282	0.00227423	clathrin, heavy chain (Hc) (CLTC), mRNA.
ILMN_1712888	HSPH1	10808	0.58922	0.10446	0.000171381	0.00176586	0.27652	8.7469e-06	-0.901049	0.0782392	0.000357129	0.00346392	-0.257538	4.35253e-05	-0.639669	0.0202118	0.0210968	0.137602	-0.145376	0.0274931	heat shock 105kDa/110kDa protein 1 (HSPH1), mRNA.
ILMN_1652456	TMEM98	26022	1.43079	0.0933872	0.000861223	0.00708976	0.187832	0.00281175	-2.68487	0.082235	0.000204533	0.00215199	-0.242891	0.000119096	-0.979575	0.00449411	0.186391	0.510552	-0.0962207	0.145756	transmembrane protein 98 (TMEM98), transcript variant 1, mRNA.
ILMN_1734550	SLC9A3	6550	0.968987	0.0828643	0.00402765	0.0260654	0.177082	0.00489629	-2.0301	0.0819972	0.00021143	0.00221421	-0.247666	8.63531e-05	-1.88473	0.0458623	0.000785792	0.0121446	-0.228984	0.000464517	solute carrier family 9 (sodium/hydrogen exchanger), member 3 (SLC9A3), mRNA.
ILMN_1809477	CARHSP1	23589	-0.679153	0.101646	0.000258262	0.00250754	-0.190555	0.00243161	0.881422	0.0636044	0.00276615	0.0196755	0.17611	0.00560912	0.604529	0.0135917	0.0510391	0.246185	0.114915	0.0820272	calcium regulated heat stable protein 1, 24kDa (CARHSP1), transcript variant 2, mRNA.
ILMN_1707380	PRELP	5549	0.46812	0.06287	0.0844729	0.272732	0.0993251	0.1165	-1.60416	0.0799935	0.000279605	0.00281714	-0.228289	0.000306048	-0.701419	0.00763535	0.117119	0.400075	-0.111811	0.0906896	proline/arginine-rich end leucine-rich repeat protein (PRELP), transcript variant 1, mRNA.
ILMN_2055477	EXOSC7	23016	0.196048	0.0549271	0.341544	0.62813	0.0645184	0.30862	-1.35898	0.0798381	0.000285733	0.00286788	-0.22428	0.000392543	-0.623806	0.00873127	0.100129	0.366564	-0.104078	0.115464	exosome component 7 (EXOSC7), mRNA.
ILMN_2089073	ATP9A	10079	0.527103	0.0886912	0.00171124	0.0127111	0.171184	0.00655553	-0.848875	0.0642048	0.00254231	0.0183342	-0.170835	0.00724057	-1.06561	0.0597204	0.000135826	0.0031767	-0.209557	0.00139185	ATPase, class II, type 9A (ATP9A), mRNA.
ILMN_1815308	SDC1	6382	0.530981	0.0702581	0.0265503	0.118136	0.175556	0.00528482	-1.34381	0.0779331	0.00037271	0.0035944	-0.216537	0.000627107	-0.760565	0.0126489	0.0580402	0.266582	-0.16619	0.0115948	syndecan 1 (SDC1), transcript variant 1, mRNA.
ILMN_1682054	SRI	6717	-1.19983	0.0982735	0.000422225	0.00383866	-0.192511	0.00218814	1.71191	0.0619376	0.00349738	0.023837	0.159442	0.0122778	0.945425	0.0079303	0.112257	0.391033	0.104708	0.113268	sorcin (SRI), transcript variant 1, mRNA.
ILMN_1708936	EXOSC3	51010	-0.986629	0.097951	0.000442552	0.0039981	-0.23589	0.000162	1.1446	0.0536616	0.0113135	0.0629592	0.171435	0.0070358	0.916083	0.0139544	0.0485871	0.23884	0.132719	0.0443554	exosome component 3 (EXOSC3), transcript variant 1, mRNA.
ILMN_1740265	ACOT7	11332	0.76469	0.0978876	0.000446659	0.00402674	0.254843	4.40839e-05	-1.10094	0.0689326	0.00131025	0.0105314	-0.253472	5.79099e-05	-1.28514	0.055876	0.000221049	0.00459327	-0.250344	0.000124417	acyl-CoA thioesterase 7 (ACOT7), transcript variant hBACHb, mRNA.
ILMN_2332250	ACOT7	11332	0.782296	0.0754024	0.0121973	0.0645834	0.189926	0.00251512	-1.90304	0.0768656	0.000432564	0.00408255	-0.236523	0.000181047	-1.79926	0.0427607	0.00116447	0.0163793	-0.252674	0.000106988	acyl-CoA thioesterase 7 (ACOT7), transcript variant hBACHa, mRNA.
ILMN_1656638	BHMT	635	1.54259	0.0977388	0.000456457	0.00410178	0.244262	9.23329e-05	-2.09315	0.0654905	0.0021224	0.0157651	-0.201905	0.00145521	-1.39364	0.014522	0.0449951	0.227788	-0.12361	0.0612611	betaine-homocysteine methyltransferase (BHMT), mRNA.
ILMN_1763837	ANPEP	290	0.714884	0.0975746	0.000467518	0.004194	0.214705	0.000615661	-0.848351	0.0542412	0.0104136	0.0588481	-0.163948	0.0100013	-0.431944	0.00379856	0.207453	0.537488	-0.0568175	0.39107	alanyl (membrane) aminopeptidase (aminopeptidase N, aminopeptidase M, microsomal aminopeptidase, CD13, p150) (ANPEP), mRNA.
ILMN_2052335	MYOC	4653	-0.259268	0.0972739	0.000488472	0.00435226	-0.170849	0.0066631	0.147964	0.0340393	0.22384	0.509521	0.106359	0.0960328	0.23952	0.0133054	0.0530662	0.252436	0.135307	0.040336	myocilin, trabecular meshwork inducible glucocorticoid response (MYOC), mRNA.
ILMN_1799796	DIS3	22894	-1.33416	0.0956849	0.000615866	0.00531219	-0.243195	9.9296e-05	0.792836	0.033828	0.232255	0.520177	0.106286	0.0962625	-0.0485485	-0.00325613	0.944256	0.982285	-0.000931555	0.988789	DIS3 mitotic control homolog (S. cerevisiae) (DIS3), mRNA.
ILMN_3178792	HNRNPA2B1	3181	0.0860841	0.0533823	0.477904	0.739531	0.0433524	0.494149	1.35119	0.0746026	0.000593215	0.00537771	0.244558	0.00010653	0.505641	0.0035728	0.21488	0.546548	0.101939	0.123175	heterogeneous nuclear ribonucleoprotein A2/B1 (HNRNPA2B1), transcript variant B1, mRNA.
ILMN_1805827	PPA1	5464	0.363917	0.0705784	0.0252831	0.113978	0.139896	0.0266763	-0.85643	0.0711459	0.00096141	0.00809632	-0.210007	0.000919441	-0.741107	0.0313483	0.00498427	0.048744	-0.142856	0.0303235	pyrophosphatase (inorganic) 1 (PPA1), mRNA.
ILMN_1693259	PDCD6IP	10015	-0.762676	0.0920564	0.001046	0.00837189	-0.206762	0.000984036	1.18455	0.0669083	0.0017397	0.0133545	0.251956	6.43373e-05	1.03324	0.0280202	0.00764371	0.0664647	0.192998	0.00329609	programmed cell death 6 interacting protein (PDCD6IP), mRNA.
ILMN_1674009	TKTL1	8277	1.35829	0.0712829	0.02271	0.105237	0.100921	0.110718	-2.54778	0.059164	0.00517327	0.0331344	-0.107296	0.0931212	-3.1379	0.0483646	0.000572275	0.00949323	-0.137181	0.0376216	transketolase-like 1 (TKTL1), mRNA.
ILMN_1660306	ITGA8	8516	-0.844258	0.0910128	0.00121836	0.00950843	-0.19832	0.0015901	0.884174	0.0462893	0.0329365	0.143184	0.192401	0.00244004	1.13143	0.0280099	0.00765385	0.0665285	0.179733	0.0062717	integrin, alpha 8 (ITGA8), mRNA.
ILMN_1667295	VASN	114990	0.431302	0.0896097	0.00149592	0.0113451	0.202262	0.00127388	-0.639451	0.0622839	0.00333089	0.0229236	-0.171316	0.00707615	-0.152179	-0.00129123	0.504715	0.792535	-0.0418213	0.527993	vasorin (VASN), mRNA.
ILMN_1789074	HSPA1A	3303	0.212804	0.0828434	0.00404007	0.0261347	0.182673	0.00368287	-0.535579	0.0505719	0.017641	0.0891456	-0.132931	0.0371984	-0.760232	0.0465483	0.000720357	0.0113562	-0.19288	0.00331551	heat shock 70kDa protein 1A (HSPA1A), mRNA.
ILMN_1704961	ACTG1	71	0.188783	0.0598306	0.139659	0.377278	0.113241	0.0733131	-0.738599	0.0678687	0.00152069	0.0119408	-0.172562	0.00666513	-0.211883	-6.4877e-05	0.396098	0.721723	-0.0189452	0.775047	actin, gamma 1 (ACTG1), mRNA.
ILMN_2124241	MUM1L1	139221	-1.69042	0.0889938	0.00163707	0.0122235	-0.214363	0.000628458	2.42918	0.0620279	0.00345318	0.0235902	0.179377	0.00477226	1.65357	0.01446	0.0453735	0.229001	0.138	0.036485	melanoma associated antigen (mutated) 1-like 1 (MUM1L1), mRNA.
ILMN_1720996	SLC12A2	6558	-0.308973	0.0665599	0.047005	0.180618	-0.127578	0.0434479	0.601051	0.0495135	0.0205623	0.100452	0.116788	0.0674485	0.832584	0.0450935	0.000866222	0.0130969	0.147483	0.0253032	solute carrier family 12 (sodium/potassium/chloride transporters), member 2 (SLC12A2), mRNA.
ILMN_2052331	MYOC	4653	-0.305833	0.0879606	0.00190458	0.0139263	-0.148841	0.018301	0.173914	0.0332199	0.258706	0.551566	0.098785	0.12228	0.286915	0.0118042	0.0651754	0.285805	0.121771	0.0652477	myocilin, trabecular meshwork inducible glucocorticoid response (MYOC), mRNA.
ILMN_1681103	AQP1	358	0.399199	0.0876569	0.00199127	0.0144308	0.214657	0.000617468	-0.546062	0.0523664	0.0136222	0.0728952	-0.108812	0.0885636	-0.546288	0.0226816	0.015267	0.109665	-0.157813	0.0166049	aquaporin 1 (Colton blood group) (AQP1), mRNA.
ILMN_1756920	ADAM15	8751	0.307872	0.0667995	0.0452785	0.175611	0.153694	0.0147966	-0.91332	0.0659116	0.00200065	0.0150427	-0.203235	0.00135111	-0.720779	0.0224808	0.0156723	0.111779	-0.148277	0.0245176	ADAM metallopeptidase domain 15 (ADAM15), transcript variant 4, mRNA.
ILMN_1697736	EXOSC2	23404	-0.75574	0.0675327	0.0403955	0.16163	-0.122422	0.0527286	1.83506	0.0650662	0.00225264	0.0165978	0.214639	0.000701704	1.00356	0.00839062	0.105103	0.376314	0.111814	0.0906823	exosome component 2 (EXOSC2), mRNA.
ILMN_1677824	SPHAR	5867	1.19978	0.0846085	0.00311535	0.0210512	0.202425	0.00126215	-2.17958	0.0650387	0.00226134	0.0166482	-0.198403	0.00176522	-0.895335	0.00376926	0.2084	0.538428	-0.0725371	0.273285	RAB4A, member RAS oncogene family (RAB4A), mRNA.
ILMN_1734194	EXOSC3	51010	-0.946268	0.0854943	0.00273501	0.0188556	-0.195577	0.00185086	0.908472	0.0418022	0.0644035	0.23082	0.126548	0.0474019	1.03576	0.0155481	0.039188	0.208641	0.147238	0.0255495	exosome component 3 (EXOSC3), transcript variant 1, mRNA.
ILMN_2384544	ADAM15	8751	0.52472	0.0839232	0.00344591	0.0228756	0.19144	0.00231861	-0.669192	0.0461935	0.0334048	0.144608	-0.181004	0.00439887	-0.462181	0.00599504	0.148786	0.45475	-0.116696	0.077366	ADAM metallopeptidase domain 15 (ADAM15), transcript variant 2, mRNA.
ILMN_1706304	EIF2C4	192670	1.32013	0.0690383	0.0320108	0.135672	0.167271	0.0079173	-2.19447	0.0478685	0.0261263	0.120454	-0.167233	0.00858586	-3.07862	0.0386994	0.00195067	0.024284	-0.217265	0.000910735	eukaryotic translation initiation factor 2C, 4 (EIF2C4), mRNA.
ILMN_2369682	HNRNPA2B1	3181	0.453114	0.0830545	0.0039163	0.0254585	0.170421	0.00680331	-0.825357	0.0472287	0.0286909	0.129291	-0.149806	0.0187267	-1.11129	0.0325036	0.00429885	0.0435913	-0.160686	0.014707	heterogeneous nuclear ribonucleoprotein A2/B1 (HNRPA2B1), transcript variant B1, mRNA.
ILMN_2050790	HSPB2-C11orf52	91894	1.32942	0.0794571	0.00666564	0.0396634	0.206367	0.00100681	-2.20113	0.060188	0.00447622	0.0293292	-0.235062	0.000198991	-1.30213	0.00934103	0.0918508	0.349085	-0.13561	0.0398856	chromosome 11 open reading frame 52 (C11orf52), mRNA.
ILMN_1677483	EXOSC1	51013	-0.733887	0.0815647	0.00487924	0.0306371	-0.148001	0.0189761	1.37665	0.0498312	0.0196368	0.0969269	0.162249	0.0108118	0.671487	0.00245158	0.25683	0.593742	0.0795412	0.229505	PREDICTED: exosome component 1 (EXOSC1), mRNA.
ILMN_1755749	PGK1	5230	0.633823	0.0721945	0.019775	0.0947556	0.138951	0.0277292	-0.994332	0.0492165	0.0214683	0.10388	-0.131368	0.0395077	-1.26803	0.0350711	0.00309664	0.0342659	-0.184135	0.00508932	phosphoglycerate kinase 1 (PGK1), mRNA.
ILMN_1704164	ATP13A2	23400	0.736802	0.0578382	0.197335	0.46285	0.0808227	0.201896	-2.42348	0.0587162	0.00551165	0.0349421	-0.192276	0.00245629	-0.672569	-0.000875469	0.46316	0.767534	-0.0929415	0.160054	ATPase type 13A2 (ATP13A2), mRNA.
ILMN_2352090	GPRC5C	55890	-0.628542	0.0803567	0.00583369	0.0355448	-0.171287	0.00652264	0.371508	0.0318566	0.333113	0.62781	0.0468834	0.464171	0.463672	0.00267637	0.247677	0.584543	0.0952401	0.149926	G protein-coupled receptor, family C, group 5, member C (GPRC5C), transcript variant 2, mRNA.
ILMN_1755134	HSPA4	3308	0.875907	0.0641942	0.068283	0.235035	0.103276	0.102596	-2.2059	0.0581143	0.00600208	0.0375231	-0.221825	0.000456185	-1.1644	0.0056678	0.156188	0.467073	-0.120427	0.0682944	heat shock 70kDa protein 4 (HSPA4), mRNA.
ILMN_1771333	CD47	961	0.526141	0.0797734	0.00636023	0.0381582	0.161809	0.010238	-0.732007	0.0473777	0.0280714	0.127065	-0.0817416	0.201364	-0.0480046	-0.00318985	0.888318	0.963892	0.0587279	0.375313	CD47 molecule (CD47), transcript variant 2, mRNA.
ILMN_1784367	HSPD1	3329	-0.765202	0.069933	0.0279041	0.122478	-0.145709	0.0209276	1.80919	0.0574157	0.00662704	0.0407355	0.193763	0.00226907	1.48818	0.0168052	0.0331201	0.187703	0.170169	0.00972194	heat shock 60kDa protein 1 (chaperonin) (HSPD1), nuclear gene encoding mitochondrial protein, transcript variant 1, mRNA.
ILMN_2413158	PODXL	5420	-0.354791	0.0721809	0.0198158	0.0949031	-0.121319	0.0549139	0.549452	0.0481989	0.0248962	0.116261	0.117074	0.0667737	0.724505	0.0331094	0.00397834	0.0410542	0.153437	0.0199065	podocalyxin-like (PODXL), transcript variant 1, mRNA.
ILMN_1736700	ALDOA	226	-0.331007	0.0791201	0.00700733	0.0412503	-0.18012	0.0041985	0.145071	0.0292918	0.583587	0.814861	-0.0318446	0.619157	0.2541	0.000555012	0.353923	0.686881	0.0367769	0.578964	aldolase A, fructose-bisphosphate (ALDOA), transcript variant 2, mRNA.
ILMN_1671703	ACTA2	59	-0.165343	0.0787183	0.00743812	0.0434027	-0.162625	0.00985713	0.137301	0.036184	0.155837	0.410985	0.144337	0.0235635	0.272547	0.0292173	0.00655229	0.0592853	0.177361	0.0070059	actin, alpha 2, smooth muscle, aorta (ACTA2), mRNA.
ILMN_2051408	PNPT1	87178	0.416332	0.0697143	0.028855	0.125503	0.121544	0.0544612	-0.576789	0.0348544	0.194577	0.469917	-0.0543741	0.395821	-1.31909	0.032244	0.00444405	0.0447294	-0.181512	0.00576702	polyribonucleotide nucleotidyltransferase 1 (PNPT1), mRNA.
ILMN_2349831	DICER1	23405	0.220176	0.0701951	0.0268076	0.119068	0.136789	0.0302719	-0.812444	0.039977	0.0852161	0.27967	-0.11329	0.0761388	-1.43122	0.0319359	0.00462285	0.0460862	-0.176086	0.00743136	Dicer1, Dcr-1 homolog (Drosophila) (DICER1), transcript variant 2, mRNA.
ILMN_1803136	RAB4B	53916	1.35898	0.0780309	0.00823855	0.0469665	0.168434	0.00748834	-2.07891	0.0506202	0.0175183	0.0886869	-0.175666	0.00573257	-2.2495	0.0262602	0.00959297	0.0787382	-0.170028	0.00978341	RAB4B, member RAS oncogene family (RAB4B), mRNA.
ILMN_1740917	SCNN1B	6338	-0.258322	0.0558365	0.28545	0.571161	-0.0418555	0.509193	1.01688	0.0555788	0.00860454	0.0503456	0.15076	0.0179776	0.447386	0.002049	0.274287	0.612269	0.0440464	0.506255	sodium channel, nonvoltage-gated 1, beta (SCNN1B), mRNA.
ILMN_1689953	CD81	975	-0.557331	0.0774438	0.00899111	0.0504719	-0.149293	0.0179467	0.308095	0.0297289	0.522582	0.776956	0.0139131	0.828116	0.890142	0.0116661	0.0664273	0.288911	0.0865726	0.190791	CD81 molecule (CD81), mRNA.
ILMN_1713807	MAN1C1	57134	-0.184489	0.0535455	0.459968	0.726238	-0.0383916	0.544896	0.739144	0.04145	0.0679522	0.239347	0.0959562	0.133404	1.11746	0.0306979	0.00541771	0.0517	0.139531	0.0344373	mannosidase, alpha, class 1C, member 1 (MAN1C1), mRNA.
ILMN_1812226	ICAM1	3383	1.29537	0.0764257	0.0104659	0.0570453	0.186617	0.00299813	-1.41629	0.0406357	0.076978	0.260526	-0.160247	0.0118408	0.3974	-0.00223291	0.628592	0.858861	-0.00764872	0.908153	intercellular adhesion molecule 1 (CD54), human rhinovirus receptor (ICAM1), mRNA.
ILMN_2212763	ICAM3	3385	-0.26296	0.0760754	0.0110286	0.0595009	-0.210348	0.000797941	0.341757	0.0456586	0.0361489	0.153069	0.146428	0.0216	0.235254	0.00562036	0.157295	0.468605	0.155639	0.0181795	intercellular adhesion molecule 3 (ICAM3), mRNA.
ILMN_2400219	SRI	6717	-0.426179	0.0625246	0.0893421	0.283067	-0.116493	0.065379	1.04284	0.0535304	0.011528	0.0638489	0.181382	0.00431609	0.712419	0.00969141	0.087431	0.339906	0.139981	0.0338541	sorcin (SRI), transcript variant 1, mRNA.
ILMN_1718303	PVRL2	5819	0.337072	0.0590327	0.160083	0.410562	0.100497	0.11223	-1.14851	0.0534206	0.0117106	0.064656	-0.179678	0.00470108	-0.978525	0.0176043	0.0297774	0.174414	-0.168384	0.0105262	poliovirus receptor-related 2 (herpesvirus entry mediator B) (PVRL2), transcript variant alpha, mRNA.
ILMN_1773561	RAP2C	57826	0.504111	0.0700719	0.0273173	0.120675	0.108941	0.0849859	-1.26319	0.052646	0.0130861	0.0706265	-0.144315	0.0235849	-1.26712	0.0236996	0.0133708	0.0995998	-0.107023	0.105469	RAP2C, member of RAS oncogene family (RAP2C), mRNA.
ILMN_2193980	ABCB6	10058	0.478154	0.0689326	0.0325356	0.137363	0.128367	0.0421563	-0.923168	0.0525697	0.0132303	0.0711848	-0.187819	0.00310461	-0.88109	0.0223168	0.0160114	0.113222	-0.167576	0.0109089	ATP-binding cassette, sub-family B (MDR/TAP), member 6 (ABCB6), nuclear gene encoding mitochondrial protein, mRNA.
ILMN_1809866	WDR74	54663	-0.814366	0.0744219	0.0141306	0.0726327	-0.152562	0.0155571	1.20595	0.0455336	0.0368234	0.155092	0.116637	0.0678051	1.20385	0.0146818	0.0440351	0.224829	0.111519	0.0915405	PREDICTED: WD repeat domain 74 (WDR74), mRNA.
ILMN_2329773	RAB27A	5873	1.17207	0.0743945	0.014189	0.0728457	0.155915	0.0133994	-1.5627	0.0440181	0.0461258	0.182922	-0.0999368	0.117963	-1.32186	0.00869078	0.100706	0.367727	-0.0722073	0.275478	RAB27A, member RAS oncogene family (RAB27A), transcript variant 1, mRNA.
ILMN_1694980	NAGLU	4669	0.102797	0.0519271	0.72205	0.88476	8.34758e-06	0.999895	-1.12863	0.0517478	0.0148893	0.0779991	-0.180443	0.0045247	-0.687425	0.00617935	0.144792	0.447597	-0.0916712	0.165867	N-acetylglucosaminidase, alpha- (NAGLU), mRNA.
ILMN_1752582	RAB5B	5869	-0.537421	0.0737812	0.0155606	0.0784281	-0.162768	0.00979141	1.15828	0.0511451	0.0162399	0.083602	0.162791	0.0105473	0.983668	0.0144962	0.0451525	0.228293	0.123767	0.0609304	RAB5B, member RAS oncogene family (RAB5B), mRNA.
ILMN_1774528	GPRC5C	55890	-1.38443	0.0649591	0.0604658	0.215808	-0.111339	0.0783035	2.74431	0.051592	0.015227	0.0794182	0.110977	0.0823676	1.23482	0.00160614	0.295239	0.633551	0.0474745	0.473703	G protein-coupled receptor, family C, group 5, member C (GPRC5C), transcript variant 1, mRNA.
ILMN_1734814	HSPA4	3308	0.352688	0.0666985	0.0459978	0.177629	0.112818	0.0743987	-1.29587	0.047932	0.0258854	0.119647	-0.155815	0.01443	-1.50454	0.0252046	0.0109976	0.0868892	-0.119777	0.0698094	heat shock 70kDa protein 4 (HSPA4), mRNA.
ILMN_1711189	EXOSC10	5394	-0.434767	0.0625566	0.0888784	0.282088	-0.101525	0.108588	1.42922	0.049989	0.0191931	0.0951984	0.152869	0.0164143	0.963663	0.00763868	0.117063	0.399941	0.115769	0.0797638	exosome component 10 (EXOSC10), transcript variant 1, mRNA.
ILMN_1665859	RAB27A	5873	0.834194	0.0690441	0.0319821	0.135607	0.0999865	0.114075	-1.45239	0.0497676	0.0198186	0.097605	-0.124906	0.0503744	-0.487503	-0.000697884	0.447064	0.757057	0.0108922	0.869501	RAB27A, member RAS oncogene family (RAB27A), transcript variant 4, mRNA.
ILMN_1705364	BAG6	7917	-0.363142	0.053712	0.442734	0.713753	-0.0419397	0.50834	1.96042	0.0495279	0.0205194	0.100304	0.117591	0.0655711	1.16857	0.00456644	0.184347	0.507627	0.0752884	0.255455	HLA-B associated transcript 3 (BAT3), transcript variant 2, mRNA.
ILMN_1670796	EXOSC10	5394	-0.230522	0.054223	0.395561	0.675562	-0.0660087	0.297555	1.11323	0.0492814	0.021267	0.103096	0.151038	0.0177644	0.359442	-0.00082355	0.458361	0.764853	0.0892021	0.177615	exosome component 10 (EXOSC10), transcript variant 1, mRNA.
ILMN_1769822	PLAA	9373	-1.43685	0.0710603	0.0234925	0.107922	-0.15704	0.0127368	0.342606	0.0284805	0.752351	0.902472	0.0495807	0.438837	1.18155	0.00174495	0.288461	0.626999	0.0267188	0.686893	phospholipase A2-activating protein (PLAA), transcript variant 1, mRNA.
ILMN_2363586	SDCBP	6386	0.359332	0.0701639	0.0269354	0.119454	0.130936	0.0381721	-0.366016	0.0359003	0.163302	0.423051	-0.106302	0.0962125	-0.136322	-0.00207795	0.604213	0.847163	-0.0644227	0.330699	syndecan binding protein (syntenin) (SDCBP), transcript variant 2, mRNA.
ILMN_2337336	PVRL2	5819	0.728381	0.0598744	0.138625	0.375322	0.106456	0.0923856	-1.69095	0.046909	0.0300684	0.133803	-0.165747	0.00920263	-1.0764	0.00570202	0.155395	0.465774	-0.175692	0.00756739	poliovirus receptor-related 2 (herpesvirus entry mediator B) (PVRL2), transcript variant delta, mRNA.
ILMN_1751500	ADAM15	8751	0.323538	0.0552784	0.318307	0.606039	0.0845412	0.181847	-1.09281	0.0414233	0.0682299	0.239898	-0.137868	0.0306416	-1.40939	0.0204251	0.0205137	0.135113	-0.154781	0.0188361	ADAM metallopeptidase domain 15 (ADAM15), transcript variant 4, mRNA.
ILMN_1786720	PROM1	8842	-0.36379	0.0550916	0.330394	0.617225	-0.0598384	0.345102	1.21996	0.0452945	0.0381497	0.159437	0.128306	0.0443812	1.08792	0.0123698	0.0603021	0.273043	0.0835998	0.206532	prominin 1 (PROM1), mRNA.
ILMN_1761566	C5orf32	84418	0.357784	0.06276	0.0859915	0.27571	0.119526	0.0586273	-0.719873	0.0452916	0.0381662	0.159483	-0.209537	0.000944693	-0.742544	0.0162558	0.0356421	0.196464	-0.196109	0.00281732	chromosome 5 open reading frame 32 (C5orf32), mRNA.
ILMN_1677314	MUC1	4582	-0.0312185	0.0514482	0.959499	0.985867	-0.00961108	0.879572	-0.145938	0.0281492	0.894585	0.96276	-0.00414855	0.948384	-2.46085	0.0184712	0.0265431	0.161105	-0.122039	0.0646552	mucin 1, cell surface associated (MUC1), transcript variant 1, mRNA.
ILMN_1731135	RAB11B	9230	-0.456826	0.0535649	0.457905	0.72465	-0.0372324	0.557115	2.15279	0.0451878	0.0387579	0.161173	0.097812	0.126022	0.512616	-0.00220531	0.624093	0.856352	-0.000580929	0.993009	RAB11B, member RAS oncogene family (RAB11B), mRNA.
ILMN_2366041	ITM2C	81618	-0.342517	0.0673521	0.0415444	0.164888	-0.0834434	0.187606	0.0157321	0.0280904	0.956263	0.986509	0.0155563	0.808189	0.571475	0.0131752	0.0540158	0.255232	0.0959808	0.146768	integral membrane protein 2C (ITM2C), transcript variant 2, mRNA.
ILMN_1755974	ALDOC	230	-0.119538	0.0669642	0.0441299	0.172201	-0.12619	0.0457993	0.0352147	0.0285949	0.720654	0.887462	-0.0295565	0.644573	0.117043	0.00270831	0.246409	0.583101	0.0346929	0.600672	aldolase C, fructose-bisphosphate (ALDOC), mRNA.
ILMN_1772894	TMEM27	57393	-1.33093	0.0644699	0.0653485	0.227958	-0.124239	0.0492859	2.20172	0.0443867	0.0436579	0.175794	0.156975	0.0137081	0.363566	-0.00278543	0.739867	0.909786	0.0411917	0.534229	transmembrane protein 27 (TMEM27), mRNA.
ILMN_1786034	GPRC5B	51704	-1.19996	0.0664273	0.0479895	0.183331	-0.109395	0.0836855	1.66987	0.0397199	0.0886834	0.287313	0.126905	0.0467738	1.54985	0.00864551	0.101356	0.369102	0.081044	0.220797	G protein-coupled receptor, family C, group 5, member B (GPRC5B), mRNA.
ILMN_1680453	ITM2C	81618	-0.342718	0.0659361	0.0518315	0.193383	-0.0686153	0.278843	-0.00566652	0.0280799	0.983798	0.994912	0.00666556	0.917158	0.53668	0.01243	0.0598066	0.271553	0.0682525	0.302698	integral membrane protein 2C (ITM2C), transcript variant 2, mRNA.
ILMN_2396648	EXOSC1	51013	0.0571282	0.0516041	0.835878	0.937489	0.0215023	0.73461	-0.116252	0.0283327	0.801841	0.924595	-0.0198117	0.757183	-0.97871	0.0161114	0.0363377	0.198769	-0.123638	0.0612018	exosome component 1 (EXOSC1), mRNA. XM_944315 XM_944318 XM_944323
ILMN_1716524	RAB7A	7879	0.167135	0.0535926	0.454984	0.722933	0.0190305	0.764161	-0.961882	0.0427289	0.0559722	0.20936	-0.0990705	0.121199	-0.655982	0.00353715	0.216082	0.548253	-0.0448907	0.498131	RAB7A, member RAS oncogene family (RAB7A), mRNA.
ILMN_2109994	RAB4B	53916	0.661365	0.0605502	0.123712	0.349952	0.102613	0.104831	-0.803841	0.033064	0.26607	0.559865	-0.0922512	0.14913	-1.49404	0.0154748	0.0395756	0.209783	-0.122068	0.0645902	RAB4B, member RAS oncogene family (RAB4B), mRNA.
ILMN_1783253	DDX12	440081	-0.00869016	0.0514402	0.98213	0.994582	0.0435553	0.492128	1.12987	0.0424745	0.0581635	0.214804	0.0708473	0.268325	0.0240627	-0.00327103	0.968547	0.989948	-0.00585908	0.929579	PREDICTED: DEAD/H (Asp-Glu-Ala-Asp/His) box polypeptide 12 (CHL1-like helicase homolog, S. cerevisiae), transcript variant 4 (DDX12), mRNA.
ILMN_2076602	ITM2A	9452	0.213611	0.0648475	0.061545	0.21862	0.125072	0.0477715	-0.542413	0.0336091	0.241381	0.530934	-0.106397	0.095911	-0.173447	-0.00274332	0.729392	0.905095	-0.0536234	0.418291	integral membrane protein 2A (ITM2A), mRNA.
ILMN_1714023	SLC9A5	6553	-0.821277	0.0593365	0.151934	0.398049	-0.0694441	0.273064	0.77274	0.0312446	0.375682	0.665999	0.00090242	0.988765	1.79586	0.0146939	0.0439627	0.224562	0.0714384	0.280635	solute carrier family 9 (sodium/hydrogen exchanger), member 5 (SLC9A5), mRNA.
ILMN_1671893	CHMP2A	27243	0.436058	0.0633013	0.0787911	0.25991	0.125773	0.0465264	-0.112764	0.0284167	0.772244	0.911795	-0.0646798	0.312325	-0.812319	0.0146325	0.0443286	0.225914	-0.14768	0.0251054	chromatin modifying protein 2A (CHMP2A), transcript variant 1, mRNA.
ILMN_1687785	PPA2	27068	-0.328261	0.0645149	0.0648826	0.226823	-0.0914539	0.148542	0.696162	0.0390028	0.0991859	0.309365	0.107	0.0940326	0.606307	0.00500194	0.172571	0.490244	0.0843813	0.202306	pyrophosphatase (inorganic) 2 (PPA2), nuclear gene encoding mitochondrial protein, transcript variant 3, mRNA.
ILMN_1789775	WDR74	54663	-0.617664	0.0643226	0.0668998	0.231924	-0.105455	0.0955072	0.866073	0.0364531	0.149111	0.400481	0.0468306	0.464675	0.866042	0.00541484	0.162194	0.476192	0.0969153	0.142856	PREDICTED: WD repeat domain 74 (WDR74), mRNA.
ILMN_2270845	WDR74	54663	0.101092	0.0526059	0.582396	0.809566	0.0410606	0.517277	0.726242	0.0417481	0.0649357	0.232129	0.145384	0.0225614	-0.321866	-0.000342764	0.417349	0.737653	-0.0634528	0.338047	WD repeat domain 74 (WDR74), mRNA.
ILMN_2363591	SDCBP	6386	0.346317	0.0642336	0.0678555	0.234074	0.082091	0.194885	-0.467424	0.0365658	0.14639	0.396324	-0.0563062	0.379223	-0.253185	-0.000773035	0.453767	0.761414	-0.00664911	0.920114	syndecan binding protein (syntenin) (SDCBP), transcript variant 2, mRNA.
ILMN_1694584	CLTCL1	8218	0.113876	0.0515614	0.858349	0.946728	0.0320899	0.612862	1.81257	0.0414518	0.0679333	0.239318	0.121318	0.0574153	0.572487	-0.00185037	0.5718	0.830959	0.0236978	0.720727	clathrin, heavy chain-like 1 (CLTCL1), mRNA.
ILMN_1658660	ACTC1	70	-0.233123	0.0639985	0.0704516	0.24073	-0.102587	0.104921	0.194579	0.0316574	0.346211	0.639947	0.0530243	0.40767	0.326538	0.00737434	0.121616	0.408336	0.0699796	0.2906	actin, alpha, cardiac muscle 1 (ACTC1), mRNA.
ILMN_1782939	ALB	213	0.0030455	0.0514385	0.993816	0.998233	0.0411194	0.516677	-1.04233	0.0390041	0.0991664	0.309345	-0.117722	0.0652695	-1.22271	0.0128112	0.056767	0.262952	-0.140173	0.0336079	albumin (ALB), mRNA.
ILMN_1656621	CHMP2A	27243	0.139855	0.0530315	0.520604	0.769263	0.0161871	0.798578	-0.794993	0.0389877	0.0994221	0.309958	-0.113835	0.074728	-0.955599	0.0123602	0.0603813	0.273244	-0.10703	0.105448	chromatin modifying protein 2A (CHMP2A), transcript variant 1, mRNA.
ILMN_1724211	GPRC5C	55890	-0.765253	0.057278	0.218214	0.490016	-0.0925085	0.143897	0.114372	0.0281322	0.907982	0.967819	-0.029954	0.640126	1.86376	0.0123089	0.0608078	0.274471	0.112562	0.0885313	G protein-coupled receptor, family C, group 5, member C (GPRC5C), transcript variant 1, mRNA.
ILMN_1711311	PODXL	5420	-0.191114	0.05334	0.482728	0.743167	-0.0582111	0.358403	0.832048	0.0396988	0.0889749	0.287843	0.0978254	0.12597	0.949047	0.0119372	0.0639928	0.283007	0.095754	0.14773	podocalyxin-like (PODXL), transcript variant 1, mRNA.
ILMN_1721888	ITGA2B	3674	0.539868	0.0623441	0.0920063	0.288207	0.124898	0.0480837	-0.150154	0.0284568	0.759548	0.90591	-0.0492797	0.441625	-0.449117	0.000379999	0.365171	0.696426	-0.0793731	0.230494	integrin, alpha 2b (platelet glycoprotein IIb of IIb/IIIa complex, antigen CD41B) (ITGA2B), mRNA.
ILMN_2395043	HSPA4	3308	0.383844	0.0621576	0.0948477	0.29405	0.0978454	0.122072	-0.737306	0.0387199	0.103694	0.318261	-0.111726	0.0803065	-0.392685	-0.000141519	0.401799	0.725994	-0.0339833	0.608145	heat shock 70kDa protein 4 (HSPA4), transcript variant 2, mRNA.
ILMN_1803590	ZFC3H1	196441	-0.649556	0.0612558	0.110006	0.323605	-0.135823	0.03147	0.583682	0.0312103	0.378283	0.668545	0.110371	0.0840663	0.273468	-0.00256755	0.690055	0.887563	0.0774508	0.242018	zinc finger, C3H1-type containing (ZFC3H1), mRNA.
ILMN_3243156	AHNAK2	113146	0.132237	0.0552178	0.322164	0.609628	0.0572769	0.366182	-0.0836935	0.0286975	0.695424	0.87438	0.00658535	0.918152	0.379992	0.0101406	0.0820961	0.32707	0.117998	0.074096	AHNAK nucleoprotein 2 (AHNAK2), mRNA.
ILMN_1701839	EXOSC1	51013	-0.898687	0.060814	0.118378	0.340042	-0.100929	0.110688	0.907812	0.0323838	0.30145	0.596998	0.0919033	0.150676	0.149295	-0.00316448	0.87338	0.959315	0.00741844	0.910907	PREDICTED: exosome component 1, transcript variant 4 (EXOSC1), mRNA.
ILMN_3244096	ZFC3H1	196441	-0.427814	0.0588922	0.164018	0.416029	-0.116985	0.0642426	0.817556	0.0377567	0.120798	0.350827	0.131708	0.0389958	0.724145	0.00483708	0.176924	0.496733	0.11429	0.0837148	zinc finger, C3H1-type containing (ZFC3H1), mRNA.
ILMN_1670218	EXOSC6	118460	-0.385811	0.0601447	0.132434	0.365316	-0.101677	0.108057	0.358674	0.0302977	0.458392	0.731736	0.0261528	0.683148	0.183244	-0.00268167	0.714856	0.898657	0.046634	0.481577	exosome component 6 (EXOSC6), mRNA.
ILMN_1813117	ITGA9	3680	0.376129	0.054933	0.341139	0.627727	0.0741541	0.241771	-0.927324	0.0373373	0.129197	0.36654	-0.0851	0.183401	0.299947	-0.00224313	0.630277	0.859872	0.0580854	0.380568	integrin, alpha 9 (ITGA9), mRNA.
ILMN_1714511	PARK2	5071	-0.732641	0.0568455	0.236142	0.512723	-0.0657929	0.299141	1.40205	0.0361029	0.15793	0.414815	0.0476839	0.456569	0.296336	-0.00289376	0.769334	0.922223	0.0121665	0.854394	Parkinson disease (autosomal recessive, juvenile) 2, parkin (PARK2), transcript variant 1, mRNA.
ILMN_1711899	ANXA2	302	0.0327578	0.0518502	0.744014	0.89626	0.0139219	0.826281	-0.140115	0.0308983	0.403175	0.688602	-0.0500541	0.434473	-0.255313	0.00672681	0.133616	0.428683	-0.0850526	0.198727	annexin A2 (ANXA2), transcript variant 2, mRNA.
ILMN_2076600	ITM2A	9452	-0.0664717	0.0523816	0.621142	0.832331	0.00948559	0.881133	0.0135212	0.0280921	0.953399	0.985027	0.0418631	0.513409	0.346797	0.00646948	0.138745	0.437161	0.0846833	0.20069	integral membrane protein 2A (ITM2A), mRNA.
ILMN_1659725	EXOSC5	56915	-0.623048	0.0583803	0.179314	0.438744	-0.0612883	0.333518	0.499086	0.0294073	0.56619	0.803828	0.00877471	0.891088	-0.0665526	-0.00325229	0.939562	0.980768	-0.0145311	0.826505	exosome component 5 (EXOSC5), mRNA.
ILMN_1741148	ALDOA	226	-0.121587	0.0537992	0.434114	0.707306	-0.0542671	0.391947	-0.429758	0.0354294	0.176607	0.443053	-0.14492	0.0230013	-0.137918	-0.00243543	0.664072	0.87729	-0.0391564	0.554636	aldolase A, fructose-bisphosphate (ALDOA), transcript variant 3, mRNA.
ILMN_1721713	EXOSC9	5393	-0.542522	0.058123	0.187617	0.450551	-0.0851658	0.178628	0.691983	0.032395	0.30082	0.596274	0.0534157	0.404213	0.871831	0.00396794	0.202079	0.530318	0.108418	0.100982	exosome component 9 (EXOSC9), transcript variant 1, mRNA.
ILMN_1756162	EXOSC8	11340	-0.282013	0.0581249	0.187555	0.450551	-0.0774496	0.221426	0.432516	0.033238	0.257866	0.550513	0.0854549	0.181574	0.0579465	-0.00317258	0.877944	0.960445	0.0357763	0.589341	exosome component 8 (EXOSC8), mRNA.
ILMN_1694249	CD34	947	-0.425326	0.0538684	0.427442	0.702926	-0.054839	0.386969	0.832361	0.0316456	0.347009	0.640668	0.07902	0.216831	1.24704	0.00586801	0.151612	0.459475	0.0602574	0.362983	CD34 antigen (CD34), transcript variant 2, mRNA.
ILMN_1760247	CD70	970	0.0235301	0.0514555	0.94685	0.981379	-0.0238035	0.707446	-0.721698	0.0349142	0.192613	0.466815	-0.0482788	0.450965	0.72897	0.00439103	0.18935	0.51484	0.0978686	0.138948	CD70 molecule (CD70), mRNA.
ILMN_1695719	EIF2C2	27161	-0.0414825	0.0517386	0.780388	0.914004	0.00666251	0.916353	0.426494	0.0346641	0.200985	0.479175	0.111857	0.0799516	-0.140814	-0.00255755	0.687993	0.886861	-8.0383e-05	0.999033	eukaryotic translation initiation factor 2C, 2 (EIF2C2), mRNA.
ILMN_1669645	PKD1	5310	-0.461286	0.0571377	0.223847	0.497329	-0.0663935	0.294741	0.724382	0.0335154	0.245418	0.53611	0.0761301	0.234165	0.811123	0.00416245	0.196107	0.523202	0.0540332	0.414737	polycystic kidney disease 1 (autosomal dominant) (PKD1), transcript variant 1, mRNA.
ILMN_1765409	STAM	8027	-0.464703	0.056958	0.231315	0.50666	-0.0697232	0.271136	0.33754	0.0290551	0.622884	0.83744	0.0617551	0.334756	0.221374	-0.00281294	0.746983	0.913477	0.032246	0.626615	signal transducing adaptor molecule (SH3 domain and ITAM motif) 1 (STAM), mRNA.
ILMN_1799232	ATP9A	10079	-0.013973	0.0514423	0.974258	0.991811	-0.0145646	0.818397	0.82352	0.0336335	0.240343	0.529501	0.0729856	0.254109	0.906526	0.00414564	0.196615	0.523635	0.049876	0.451597	ATPase, class II, type 9A (ATP9A), mRNA.
ILMN_1772692	DICER1	23405	-0.250292	0.0566064	0.246814	0.526253	-0.0732277	0.247719	0.247294	0.0296726	0.529765	0.781495	0.0706744	0.269498	-0.0103175	-0.00327488	0.978976	0.993023	0.0224175	0.735237	Dicer1, Dcr-1 homolog (Drosophila) (DICER1), transcript variant 2, mRNA.
ILMN_1732799	CD34	947	0.172145	0.0564799	0.252697	0.53306	0.0615833	0.331192	-0.0528584	0.0282547	0.834495	0.938917	-0.00492601	0.938728	0.307669	0.00328672	0.224748	0.558504	0.0571237	0.388518	CD34 antigen (CD34), transcript variant 2, mRNA.
ILMN_1768895	ATP13A3	79572	0.719666	0.056401	0.256454	0.536979	0.0731125	0.248466	-0.35539	0.0285699	0.727208	0.890221	-0.0663701	0.299821	-0.926641	0.000179971	0.37864	0.70716	-0.0873928	0.186607	PREDICTED: ATPase type 13A3, transcript variant 2 (ATP13A3), mRNA.
ILMN_1708946	VPS4A	27183	-0.30898	0.0563005	0.261338	0.542783	-0.0532507	0.400889	0.657692	0.0331701	0.261028	0.554138	0.0381333	0.551664	0.232127	-0.00254226	0.684875	0.885646	-0.0140818	0.831788	vacuolar protein sorting 4 homolog A (S. cerevisiae) (VPS4A), mRNA.
ILMN_3235632	ANXA2P2	304	-0.204095	0.0520663	0.686782	0.867345	0.0220543	0.728062	0.971318	0.0333234	0.253953	0.545856	0.0377211	0.555976	-0.151893	-0.00313227	0.856699	0.954502	-0.054773	0.408368	annexin A2 pseudogene 2 (ANXA2P2), non-coding RNA.
ILMN_1766499	HSPA2	3306	-0.0173805	0.051486	0.911554	0.967952	-0.00618973	0.92227	0.233127	0.031282	0.372869	0.663524	0.0523882	0.413327	0.331829	0.00358086	0.21461	0.546201	0.04483	0.498712	heat shock 70kDa protein 2 (HSPA2), mRNA.
ILMN_1706406	ATP9A	10079	-0.466645	0.0539585	0.418997	0.695886	-0.0550666	0.384998	0.0123842	0.028079	0.988958	0.996054	-0.00344847	0.957085	1.09124	0.00332665	0.223339	0.556434	0.0279329	0.673464	ATPase, class II, type 9A (ATP9A), mRNA.
ILMN_1745271	EXOSC4	54512	-0.24012	0.0526534	0.574816	0.804404	-0.0137405	0.828509	-0.429735	0.0295463	0.546552	0.791734	-0.0899236	0.159705	0.888158	0.00330142	0.224228	0.557699	0.0381854	0.564503	exosome component 4 (EXOSC4), mRNA.
ILMN_1663684	ATP13A3	79572	-0.607592	0.0559323	0.280252	0.565164	-0.0529384	0.403661	0.765113	0.0308513	0.407129	0.691796	0.0298657	0.641113	-0.726308	-0.00063354	0.441446	0.753808	-0.0268263	0.6857	PREDICTED: ATPase type 13A3, transcript variant 3 (ATP13A3), mRNA.
ILMN_2402168	EXOSC10	5394	0.125309	0.0559004	0.281968	0.566942	0.0688367	0.277291	0.350941	0.0311774	0.380805	0.67061	0.0710308	0.267084	0.0276343	-0.00325839	0.947214	0.983209	-0.0136898	0.836405	exosome component 10 (EXOSC10), transcript variant 2, mRNA.
ILMN_2059452	SLC12A2	6558	0.114096	0.0558636	0.283964	0.569285	0.0373865	0.555484	0.115331	0.0283743	0.786649	0.918136	-0.0113772	0.859084	0.435383	0.00113171	0.320007	0.657488	-0.00261417	0.968548	solute carrier family 12 (sodium/potassium/chloride transporters), member 2 (SLC12A2), mRNA.
ILMN_1720829	ZFP36	7538	-0.000187901	0.0514383	0.997406	0.999155	-0.0244743	0.699594	0.0113943	0.028141	0.900868	0.965172	0.0376851	0.556354	-0.107207	0.00278814	0.243274	0.579385	-0.0446914	0.500042	zinc finger protein 36, C3H type, homolog (mouse) (ZFP36), mRNA.
ILMN_1751708	ITM2B	9445	-0.147175	0.053058	0.517154	0.767704	-0.0594036	0.348624	-0.453048	0.0326007	0.289555	0.584998	-0.0776963	0.224653	-0.226698	-0.00202183	0.595876	0.84297	-0.0193205	0.770714	integral membrane protein 2B (ITM2B), mRNA.
ILMN_1784516	TTC18	118491	-0.0679986	0.0515346	0.874566	0.952793	0.00148207	0.981361	0.525059	0.0305908	0.43011	0.710723	0.0207125	0.746511	-0.754453	0.00251557	0.254183	0.591182	-0.0822378	0.214049	tetratricopeptide repeat domain 18 (TTC18), mRNA.
ILMN_1652371	KIAA1324L	222223	0.199238	0.0553681	0.312708	0.599919	0.0231953	0.714591	-0.290997	0.0315996	0.350142	0.643217	-0.0398934	0.533439	-0.331257	0.00138652	0.306385	0.644408	-0.0188126	0.776581	KIAA1324-like (KIAA1324L), transcript variant 2, mRNA.
ILMN_1769083	GSTA3	2940	-0.468107	0.0529104	0.536914	0.780239	-0.0381818	0.547099	1.1657	0.0322459	0.309336	0.60522	0.058721	0.359088	-0.776167	-0.00123089	0.498307	0.789076	-0.0402439	0.543685	glutathione S-transferase A3 (GSTA3), mRNA.
ILMN_1677590	RAP2B	5912	-0.616347	0.0552492	0.32016	0.607902	-0.0654063	0.301996	-0.156754	0.0281876	0.869335	0.95307	-0.0276993	0.665511	0.188762	-0.00311843	0.850127	0.952713	0.0342151	0.605699	RAP2B, member of RAS oncogene family (RAP2B), mRNA.
ILMN_3242016	POTEE	445582	0.607979	0.0551346	0.327559	0.615012	0.0515189	0.416402	-0.40498	0.0286458	0.707804	0.881248	-0.0504803	0.430566	0.545038	-0.00215322	0.615793	0.853005	0.0889298	0.178947	POTE ankyrin domain family, member E (POTEE), mRNA.
ILMN_1658684	ATP9B	374868	0.579145	0.054906	0.343014	0.62954	0.0442824	0.484923	-0.916676	0.0317092	0.342738	0.636939	-0.0673801	0.292511	-0.647175	-0.00132051	0.507874	0.794031	-0.0148393	0.822885	ATPase, class II, type 9B (ATP9B), mRNA.
ILMN_1755203	CUBN	8029	-0.475096	0.0540434	0.411255	0.690002	-0.038617	0.542537	-0.396928	0.0287219	0.689788	0.871798	0.0116924	0.855222	1.01316	0.00165591	0.292786	0.631194	0.0338078	0.61	cubilin (intrinsic factor-cobalamin receptor) (CUBN), mRNA.
ILMN_1810608	PNPT1	87178	-0.320683	0.054357	0.384407	0.665888	-0.066998	0.290357	0.652235	0.0317241	0.341751	0.635904	0.0699695	0.274315	0.281656	-0.00256489	0.689505	0.887356	0.0046494	0.944092	polyribonucleotide nucleotidyltransferase 1 (PNPT1), mRNA.
ILMN_1680129	NSUN2	54888	0.25711	0.0546343	0.362687	0.647465	0.0337487	0.594613	-0.0669625	0.0281688	0.881012	0.957788	0.0137934	0.829573	0.0190791	-0.00327021	0.966746	0.989552	0.0482549	0.466455	NOP2/Sun domain family, member 2 (NSUN2), mRNA.
ILMN_1810387	PLAA	9373	-0.0714223	0.0516022	0.836814	0.937893	-0.034233	0.589332	-0.387728	0.0292097	0.596609	0.822505	-0.0113659	0.859222	0.762781	0.00116561	0.31815	0.65611	0.0979155	0.138758	phospholipase A2-activating protein (PLAA), transcript variant 1, mRNA.
ILMN_2153916	HSPA2	3306	0.151564	0.0544844	0.374205	0.656856	0.0567153	0.370908	0.090098	0.028477	0.753412	0.902882	-0.00566157	0.929601	0.161472	-0.0019231	0.58177	0.835833	-0.00174919	0.978952	heat shock 70kDa protein 2 (HSPA2), mRNA.
ILMN_1663042	SDC4	6385	-0.0997077	0.051712	0.79009	0.918302	-0.0629999	0.320169	0.236908	0.0287515	0.683112	0.868517	0.0489019	0.445137	0.586504	0.000943034	0.330607	0.66677	0.100489	0.128626	syndecan 4 (SDC4), mRNA.
ILMN_1715994	HGS	9146	0.209824	0.0543388	0.385896	0.667052	0.0507023	0.423838	-0.364094	0.030929	0.400626	0.686469	-0.0470216	0.462854	-0.0437483	-0.00323345	0.920484	0.974794	-0.00983089	0.882119	hepatocyte growth factor-regulated tyrosine kinase substrate (HGS), mRNA.
ILMN_1660436	HSPA1B	3304	-0.0253556	0.0516924	0.797576	0.921632	-0.0125286	0.843431	-0.128503	0.0309886	0.395738	0.682572	-0.0295037	0.645164	-0.129714	-0.000314309	0.415097	0.735928	-0.0534458	0.419836	heat shock 70kDa protein 1B (HSPA1B), mRNA.
ILMN_2296510	SLC5A12	159963	0.52429	0.0537556	0.438392	0.710483	0.0278224	0.660897	0.430719	0.028778	0.677261	0.865733	0.0206211	0.747592	-0.45754	-0.00246381	0.66944	0.879459	-0.0314313	0.635358	solute carrier family 5 (sodium/glucose cotransporter), member 12 (SLC5A12), transcript variant 1, mRNA.
ILMN_1759910	SERPINA5	5104	-0.15147	0.0536675	0.447239	0.717439	-0.0524375	0.40813	0.00559615	0.0280796	0.985547	0.99527	0.0177195	0.782145	-0.0938405	-0.00286258	0.760433	0.918278	-0.0104306	0.874985	serpin peptidase inhibitor, clade A (alpha-1 antiproteinase, antitrypsin), member 5 (SERPINA5), mRNA.
ILMN_1677305	PVR	5817	0.0354231	0.0514694	0.92847	0.97426	0.000202239	0.997456	-0.568084	0.030366	0.451547	0.726993	-0.0292958	0.647496	0.303065	-0.0025608	0.688662	0.887045	0.037025	0.576404	poliovirus receptor (PVR), mRNA.
ILMN_1732468	HSPA4L	22824	-0.474965	0.0534919	0.465732	0.730443	-0.0703096	0.267116	0.068404	0.0280964	0.946504	0.982398	0.0462201	0.470523	-0.826446	-0.0005537	0.434625	0.74904	-0.0125383	0.849995	heat shock 70kDa protein 4-like (HSPA4L), mRNA.
ILMN_1792075	CD22	933	-0.478141	0.0532479	0.493543	0.751549	-0.0659492	0.297992	-0.654169	0.029474	0.556598	0.797694	-0.0570049	0.373328	-0.622994	-0.00190943	0.579869	0.834912	-0.0472417	0.475876	CD22 molecule (CD22), mRNA.
ILMN_1792587	VPS4B	9525	-0.186395	0.053049	0.518319	0.768311	-0.0493313	0.436494	0.366903	0.0299649	0.49423	0.757443	0.10548	0.0988254	0.166132	-0.00287296	0.763354	0.919605	0.0474117	0.474288	vacuolar protein sorting 4 homolog B (S. cerevisiae) (VPS4B), mRNA.
ILMN_1712312	RAB11A	8766	-0.129374	0.0524557	0.607745	0.824376	-0.0314915	0.619505	0.157257	0.0285348	0.736762	0.894823	0.06368	0.31988	-0.348863	-0.000769368	0.453436	0.761327	-0.0348098	0.599444	RAB11A, member RAS oncogene family (RAB11A), mRNA.
ILMN_1739734	CLTCL1	8218	-0.195005	0.0518625	0.74035	0.894479	-0.00900362	0.887131	-0.0248017	0.0280808	0.979897	0.993787	-0.0349696	0.585169	-0.682993	-0.00129939	0.505591	0.793109	-0.0717649	0.278437	clathrin, heavy chain-like 1 (CLTCL1), mRNA.
ILMN_1795822	DIS3L	115752	-0.118008	0.0526821	0.57033	0.801866	-0.00413017	0.948088	-0.000127036	0.0280783	0.999706	0.999936	-0.0422355	0.509666	0.0242052	-0.00325624	0.944394	0.982328	-0.0122167	0.853799	DIS3 mitotic control homolog (S. cerevisiae)-like (DIS3L), mRNA.
ILMN_1755120	MAN1A2	10905	-0.185542	0.0522783	0.640945	0.843405	-0.0266519	0.67433	0.0803883	0.0281361	0.904766	0.966486	0.0193204	0.763023	-0.4161	-0.00163441	0.544053	0.815855	-0.0231878	0.726495	mannosidase, alpha, class 1A, member 2 (MAN1A2), mRNA.
ILMN_2312719	EXOSC9	5393	0.0816128	0.0520743	0.684906	0.866519	0.0257413	0.684853	0.244913	0.029028	0.627751	0.840135	0.00682073	0.915237	-0.0906275	-0.00314626	0.863686	0.956563	-0.0288412	0.663485	exosome component 9 (EXOSC9), transcript variant 1, mRNA.
ILMN_1766171	SNF8	11267	-0.0478531	0.0518723	0.73748	0.893241	-0.0430644	0.497025	0.0499615	0.028247	0.838084	0.940628	0.045033	0.482009	-0.0842636	-0.00272857	0.725832	0.903903	-0.00473125	0.943109	SNF8, ESCRT-II complex subunit, homolog (S. cerevisiae) (SNF8), mRNA.
ILMN_2075507	MAN1A2	10905	0.00195583	0.0514384	0.996442	0.998913	0.0265331	0.675699	-0.059161	0.0281057	0.934367	0.978152	-0.00251098	0.968745	-0.126251	-0.00314738	0.864257	0.956694	0.0291697	0.659891	mannosidase, alpha, class 1A, member 2 (MAN1A2), mRNA.
