# Supplementary material for: Genetic regulation of exosome biogenesis pathway in human adipose and muscle tissue and association with obesity and insulin resistance
Source: Research Square preprint supplement (doi:10.21203/rs.3.rs-6580546/v1), 2025-07-11
Supplement: Supplementary file 5 [file 59ac1fc0fbe572fc57d54f51.docx]

**Supplementary Materials:**

**Supplementary Tables**

*All large supplementary tables are included in the Microsoft Excel file:*

*Supplementary tables-Exosome-genetics-4-24-2025.xlsx*

**Supplementary Table 1: Human Exosome pathway.** A curated list of genes involved in biogenesis, assembly and secretion in the cellular component exosome.

**Supplementary Table 2: Transcript levels of exosome pathway genes in adipose tissue is associated with obesity and glucometabolic traits in AAGMEx cohort (African Ancestry Americans).** Results from linear regression analysis and Spearman partial correlation analysis for all expressed exosome pathway genes are shown. Transcript probes associated with glucometabolic traits (q-value <0.05 in linear regression) are shown in bold letters. Some genes are represented by more than one probe.

**Supplementary Table-3: Transcript levels of exosome pathway genes in adipose tissue is associated with obesity and glucometabolic traits in METSIM cohort (European Ancestry).** Results from linear regression analysis for all expressed exosome pathway genes are shown. Most significantly correlated probes for each gene in METSIM study (from Civelek et al., 2017) are shown.

**Supplementary Table-4: Transcript levels of exosome pathway genes in skeletal muscle tissue is associated with obesity and glucometabolic traits in AAGMEx cohort (African Ancestry Americans).** Results from linear regression analysis and Spearman partial correlation analysis for all expressed exosome pathway genes are shown. Transcript probes associated with glucometabolic traits (q-value <0.05 in linear regression) are shown in bold letters. Some genes are represented by more than one probe.

**Supplementary table-5: Transcript levels of exosome pathway genes in skeletal muscle are associated with BMI in FUSION cohort (European Ancestry).** Transcripts from RNA-sequencing analysis for genes expressed in skeletal muscle tissue from participants in FUSION cohort and significant with q-value<0.05 in linear regression analysis (base model) are shown. Summary statistics of previously completed analyses was obtained for this study from publicly available data source (<https://www.ebi.ac.uk/birney-srv/FUSION/>)

**Supplementary Table 6: cis-eQTLs for exosome pathway genes in adipose tissue of African Americans (AAGMEX cohort).** Sorted list of probes representing transcripts of exosome pathway genes (sorted based on smallest cis-eQTL analysis p-values based on either directly genotyped or imputed SNPs). MAF, Minor Allele Frequency; beta, effect size of minor allele; eQTL p value, significance in additive model (in MatrixEQTL analysis), FDR, FDP corrected P- value for directly genotyped SNPs. Most significant directly genotyped or imputed cis-eSNP with MAF≥0.01 are shown.

**Supplementary Table 7: Validation of cis-eQTLs for exosome pathway genes in a meta-analysis of adipose tissue transcript data.** Significant (P ≤ 1e-6) lead variants of top signal per gene from APEX meta-analysis of METSIM, FUSION, TwinsUK and GTEx cohort data from Brotman SM *et al*. study (Nature Genetics, 2025) is shown. 'variant' indicates the chromosome_position(hg19)_refAllele_altAllele of the most significant variant associated with the gene for that signal.The alt allele is the effect allele. 'beta’ is the variant to gene effect for the joint model with all signals. pval_marginal is the p-value from the single-variant meta-analysis in total cohort or Eurpean only analysis shown. Almost all study participants (2,256 out of 2,344) were European ancestry. Results for the 42 of the 45 exoosme pathway cis-eGenes identified in AAGMEx (in S. table-6) and validated in the meta-analysis are shown.

**Supplementary Table 8: cis-eQTLs for exosome pathway genes in muscle tissue of African Americans (AAGMEX cohort).** Sorted list of probes representing transcripts of exosome pathway genes (sorted based on smallest cis-eQTL analysis p-values based on either directly genotyped or imputed SNPs). MAF, Minor Allele Frequency; beta, effect size of minor allele; eQTL p-value, significance in additive model (in MatrixEQTL analysis), FDR, FDP corrected P- value for directly genotyped SNPs. Most significant directly genotyped or imputed cis-eSNP with MAF≥0.01 are shown.

**Supplementary Table 9: Adipose expressed exosome pathway genes are target genes for obesity and related gluco-cardio-metabolic trait-associated SNPs identified in GWAS datasets.** Target genes for gluco-metabolic trait GWAS-identified SNPs predicted by cS2G method, are members of exosome pathway, and transcript levels in adipose tissue associated with gluco-metabolic traits in AAGMEx cohort are shown.
