# Supplementary material for: Genetic regulation of exosome biogenesis pathway in human adipose and muscle tissue and association with obesity and insulin resistance
Source: Research Square preprint supplement (doi:10.21203/rs.3.rs-6580546/v1), 2025-07-11
Supplement: Supplementary file 6 [file 9598c65b9f92fbadd937477d.xlsx]

## Sheet: S.Table-3
Supplementary Table-3: Transcript levels of exosome pathway genes in adipose tissue is associated with obesity and glucometabolic traits in METSIM cohort (European Ancestry)
Results from linear regression analysis for all expressed exosome pathway genes are shown.
Most significantly correlated probes for each gene in METSIM study (from Civelek et al., 2017) are shown.
human_entrez_gene	human_ensembl_gene	probesetID	gene_symbol	Body Mass Index-Beta	Body Mass Index-P-value	Body Mass Index-FDR	Matsuda insulin sensitivity index-Beta	Matsuda insulin sensitivity index-P-value	Matsuda insulin sensitivity index-FDR	Gescription
717	ENSG00000166278	11717045_a_at	C2	0.401843	3.03218e-31	8.10597e-28	-0.195306	5.42528e-08	3.67886e-06	Complement component 2
5054	ENSG00000106366	11757312_x_at	SERPINE1	0.400543	4.90264e-31	1.26156e-27	-0.23543	4.59667e-11	6.36262e-09	serpin peptidase inhibitor, clade E (nexin, plasminogen activator inhibitor type 1), member 1
928	ENSG00000010278	11715568_a_at	CD9	0.379304	9.37081e-28	1.47758e-24	-0.228776	1.50642e-10	1.8697e-08	CD9 molecule
5911	ENSG00000125249	11719402_a_at	RAP2A	0.367956	4.25023e-26	5.34772e-23	-0.186529	2.07498e-07	1.19077e-05	RAP2A, member of RAS oncogene family
26022	ENSG00000006042	11757310_s_at	TMEM98	0.359785	6.03951e-25	6.61126e-22	-0.186561	1.95151e-07	1.12794e-05	Transmembrane protein 98
79026	ENSG00000124942	11725501_at	AHNAK	0.348721	1.94649e-23	1.74008e-20	-0.162185	6.31181e-06	0.000224853	AHNAK nucleoprotein
3309	ENSG00000044574	11725931_at	HSPA5	0.345606	5.0488e-23	4.27613e-20	-0.178923	5.96662e-07	2.99473e-05	heat shock 70kDa protein 5 (glucose-regulated protein, 78kDa)
2335	ENSG00000115414	11739535_s_at	FN1	0.344982	6.10386e-23	5.1171e-20	-0.135332	0.00017055	0.00344931	Fibronectin 1
3685	ENSG00000138448	11757515_s_at	ITGAV	0.344219	7.6913e-23	6.39007e-20	-0.185997	2.27786e-07	1.29214e-05	Integrin, alpha V
5549	ENSG00000188783	11727893_at	PRELP	0.328324	8.24894e-21	5.18508e-18	-0.266517	6.07515e-14	1.41937e-11	proline/arginine-rich end leucine-rich repeat protein
5768	ENSG00000116260	11715556_a_at	QSOX1	0.322264	4.56624e-20	2.58913e-17	-0.175891	9.61513e-07	4.5331e-05	Quiescin Q6 sulfhydryl oxidase 1
629	ENSG00000243649	11733725_a_at	CFB	0.321935	5.00595e-20	2.82119e-17	-0.185319	2.47498e-07	1.3909e-05	Complement factor B
942	ENSG00000114013	11736375_a_at	CD86	0.316566	2.20418e-19	1.14954e-16	-0.229765	1.29318e-10	1.62599e-08	CD86 molecule
7037	ENSG00000072274	11715477_at	TFRC	0.312022	7.54924e-19	3.68555e-16	-0.209666	5.42966e-09	4.73285e-07	Transferrin receptor
301	ENSG00000135046	11744954_x_at	ANXA1	0.307566	2.47347e-18	1.11297e-15	-0.204789	1.04651e-08	8.54423e-07	Annexin A1
26523	ENSG00000092847	11720866_a_at	AGO1	0.307506	2.51301e-18	1.12993e-15	-0.14081	9.41386e-05	0.002129	argonaute RISC catalytic component 1
10808	ENSG00000120694	11749659_s_at	HSPH1	0.304845	5.0539e-18	2.16247e-15	-0.279728	3.6311e-15	1.03024e-12	heat shock 105kDa/110kDa protein 1
5311	ENSG00000118762	11718654_s_at	PKD2	0.298575	2.55038e-17	1.00576e-14	-0.214589	1.87756e-09	1.82006e-07	polycystic kidney disease 2 (autosomal dominant)
358	ENSG00000240583	11715942_a_at	AQP1	0.298189	2.81432e-17	1.10294e-14	-0.110818	0.00217696	0.0251547	Aquaporin 1
4644	ENSG00000197535	11724357_a_at	MYO5A	0.286639	4.98757e-16	1.61267e-13	-0.163333	5.75332e-06	0.000207936	myosin VA (heavy chain 12, myoxin)
60	ENSG00000075624	11756071_x_at	ACTB	0.280297	2.28734e-15	6.69217e-13	-0.207594	6.87776e-09	5.86541e-07	Actin, beta
7879	ENSG00000075785	11722811_s_at	RAB7A	0.278343	3.628e-15	1.02975e-12	-0.137387	0.00013294	0.0028209	RAB7A, member RAS oncogene family
5912	ENSG00000181467	11733946_at	RAP2B	0.277399	4.52865e-15	1.26838e-12	-0.184393	2.95318e-07	1.62478e-05	RAP2B, member of RAS oncogene family
4925	ENSG00000070081	11746359_a_at	NUCB2	0.266208	5.87126e-14	1.37607e-11	-0.176798	9.18361e-07	4.35632e-05	nucleobindin 2
3312	ENSG00000109971	11720916_s_at	HSPA8	0.266064	6.06422e-14	1.41726e-11	-0.203022	1.49158e-08	1.17308e-06	Heat shock 70kDa protein 8
302	ENSG00000182718	11740880_x_at	ANXA2	0.25829	3.35083e-13	6.92684e-11	-0.146442	4.99622e-05	0.00126786	Annexin A2
3416	ENSG00000119912	11763184_at	IDE	0.257051	4.37759e-13	8.86875e-11	-0.10096	0.0050747	0.0466521	Insulin-degrading enzyme
71	ENSG00000184009	11752959_x_at	ACTG1	0.251876	1.31637e-12	2.4442e-10	-0.162685	5.97452e-06	0.000214799	Actin, gamma 1
5230	ENSG00000102144	11733871_a_at	PGK1	0.249399	2.21023e-12	3.95647e-10	-0.117129	0.00117081	0.0157498	Phosphoglycerate kinase 1
3920	ENSG00000005893	11717479_at	LAMP2	0.238849	1.88801e-11	2.84156e-09	-0.167626	3.18658e-06	0.000126347	Lysosomal-associated membrane protein 2
10015	ENSG00000170248	11716145_a_at	PDCD6IP	0.236042	3.28452e-11	4.70453e-09	-0.185071	2.44594e-07	1.37615e-05	Programmed cell death 6 interacting protein
23743	ENSG00000132840	11746667_a_at	BHMT2	0.234608	4.34692e-11	6.05311e-09	-0.12412	0.000573503	0.0090487	Betaine--homocysteine S-methyltransferase 2
114990	ENSG00000168140	11756922_a_at	VASN	0.233996	4.89637e-11	6.73345e-09	-0.0826129	0.0221445	0.126681	Vasorin
55240	ENSG00000115107	11722678_a_at	STEAP3	0.233227	5.68368e-11	7.73007e-09	-0.100636	0.00532603	0.0483186	STEAP family member 3, metalloreductase
1213	ENSG00000141367	11739028_s_at	CLTC	0.233009	5.92823e-11	8.02585e-09	-0.154173	1.75795e-05	0.000533147	clathrin, heavy chain (Hc)
4121	ENSG00000111885	11736102_at	MAN1A1	0.230972	8.77248e-11	1.14538e-08	-0.181257	4.49982e-07	2.34678e-05	mannosidase, alpha, class 1A, member 1
11332	ENSG00000097021	11717743_a_at	ACOT7	0.2292	1.23021e-10	1.55394e-08	-0.0679887	0.0600805	0.230283	Acyl-CoA thioesterase 7
1192	ENSG00000213719	11746251_x_at	CLIC1	0.210238	3.85386e-09	3.47157e-07	-0.171053	1.91005e-06	8.1483e-05	Chloride intracellular channel 1
3383	ENSG00000090339	11733000_at	ICAM1	0.207902	5.76546e-09	4.9937e-07	-0.0847731	0.018921	0.114575	Intercellular adhesion molecule 1
4904	ENSG00000065978	11756972_x_at	YBX1	0.205224	9.09776e-09	7.53747e-07	-0.106914	0.003061	0.032369	Y box binding protein 1
113146	ENSG00000185567	11717132_s_at	AHNAK2	0.203969	1.12417e-08	9.10303e-07	-0.0693513	0.0549174	0.218936	AHNAK NUCLEOPROTEIN 2
5867	ENSG00000168118	11721301_a_at	RAB4A	0.200306	2.06863e-08	1.56768e-06	-0.129066	0.000343054	0.00603738	RAB4A, member RAS oncogene family
3678	ENSG00000161638	11715703_s_at	ITGA5	0.16455	4.43293e-06	0.00016666	-0.159287	9.15782e-06	0.000308806	integrin, alpha 5 (fibronectin receptor, alpha polypeptide)
112574	ENSG00000178996	11730383_a_at	SNX18	0.160138	7.99639e-06	0.000275412	-0.114554	0.00148159	0.0188564	SORTING NEXIN 18
6337	ENSG00000111319	11755282_a_at	SCNN1A	0.15898	9.31154e-06	0.000313169	-0.112501	0.00180654	0.0218663	sodium channel, non-voltage-gated 1 alpha subunit
8766	ENSG00000103769	11718029_a_at	RAB11A	0.157367	1.14918e-05	0.000372744	-0.0503186	0.163932	0.385568	RAB11A, member RAS oncogene family
79572	ENSG00000133657	11720136_s_at	ATP13A3	0.148777	3.40143e-05	0.000924001	-0.0776676	0.0317474	0.158475	ATPase type 13A3
961	ENSG00000196776	11743348_a_at	CD47	0.147409	4.02143e-05	0.00105931	-0.171699	1.78342e-06	7.68058e-05	CD47 molecule
8277	ENSG00000007350	11726242_a_at	TKTL1	0.145837	4.86578e-05	0.00124062	-0.0488132	0.178173	0.400771	Transketolase-like 1
3676	ENSG00000115232	11724343_at	ITGA4	0.143961	6.09355e-05	0.00149047	-0.121456	0.000757631	0.0112348	integrin, alpha 4 (antigen CD49D, alpha 4 subunit of VLA-4 receptor)
4582	ENSG00000185499	11750536_x_at	MUC1	0.142093	7.60189e-05	0.00178575	-0.0955106	0.00827235	0.0657439	Mucin 1, cell surface associated
7512	ENSG00000122121	11737946_a_at	XPNPEP2	0.138621	0.000113867	0.00248965	-0.0621439	0.0853803	0.279044	X-prolyl aminopeptidase (Aminopeptidase P) 2, membrane-bound
290	ENSG00000166825	11717127_a_at	ANPEP	0.129547	0.000313199	0.00561639	-0.134077	0.000195802	0.0038498	Alanyl (Membrane) aminopeptidase
635	ENSG00000145692	11758077_s_at	BHMT	0.127917	0.000373107	0.00645454	-0.0906985	0.0120752	0.0852439	Betaine--homocysteine S-methyltransferase
26	ENSG00000002726	11719962_s_at	AOC1	0.121248	0.000747653	0.0111127	-0.0528822	0.144956	0.364101	amine oxidase, copper containing 1
5873	ENSG00000069974	11758934_x_at	RAB27A	0.114584	0.00144801	0.0185336	-0.109917	0.00234042	0.026548	RAB27A, member RAS oncogene family
5819	ENSG00000130202	11718065_a_at	PVRL2	0.104661	0.00364324	0.0367848	-0.0461177	0.20214	0.424198	poliovirus receptor-related 2 (herpesvirus entry mediator B)
6557	ENSG00000074803	11752597_a_at	SLC12A1	0.099147	0.00589555	0.0518757	0.00796386	0.826618	0.710058	SOLUTE CARRIER FAMILY 12 (SODIUM/POTASSIUM/CHLORIDE TRANSPORTER), MEMBER 1
84418	ENSG00000120306	11716579_a_at	CYSTM1	0.0966927	0.00725191	0.059998	-0.0733308	0.0427568	0.189615	cysteine-rich transmembrane module containing 1
3304	ENSG00000204388	11729119_a_at	HSPA1B	0.095309	0.00813421	0.0649551	-0.0713458	0.0484905	0.203903	Heat shock 70kDa protein 1B
4924	ENSG00000104805	11755969_a_at	NUCB1	0.0859553	0.0170464	0.10714	-0.0453597	0.209311	0.430773	Nucleobindin 1
3306	ENSG00000126803	11724723_a_at	HSPA2	0.0844078	0.01915	0.115464	0.00716744	0.84301	0.713925	Heat shock 70kDa protein 2
2940	ENSG00000174156	11731781_x_at	GSTA3	0.0843879	0.0191785	0.115566	-0.075155	0.0374444	0.175128	Glutathione S-transferase alpha 3
55512	ENSG00000103056	11726509_at	SMPD3	0.0838785	0.0199197	0.118433	-0.0739591	0.0409557	0.184751	sphingomyelin phosphodiesterase 3, neutral membrane (neutral sphingomyelinase II)
6382	ENSG00000115884	11716577_s_at	SDC1	0.0834966	0.0204918	0.120628	-0.0398622	0.271986	0.48184	syndecan 1
5104	ENSG00000188488	11716376_at	SERPINA5	0.0832603	0.0208528	0.121936	-0.0814337	0.0244709	0.135004	serpin peptidase inhibitor, clade A (alpha-1 antiproteinase, antitrypsin), member 5
5672	ENSG00000243137	11715205_x_at	PSG4	0.0823581	0.0222826	0.127179	-0.0144468	0.690545	0.673842	Pregnancy specific beta-1-glycoprotein 4
4151	ENSG00000198125	11715709_x_at	MB	0.0810389	0.0245262	0.135203	-0.0483643	0.18227	0.40504	Myoglobin
11267	ENSG00000159210	11735033_a_at	SNF8	0.080321	0.0258273	0.139703	-0.012039	0.739966	0.68795	SNF8, ESCRT-II complex subunit
27254	ENSG00000172346	11720729_at	CSDC2	0.0801342	0.0261755	0.140859	-0.0674345	0.0616466	0.233624	cold shock domain containing C2, RNA binding
6407	ENSG00000124157	11719656_at	SEMG2	0.0793752	0.0276322	0.145687	-0.0522299	0.149997	0.369942	Semenogelin II
947	ENSG00000174059	11751368_a_at	CD34	0.0763106	0.0342445	0.165916	0.0447019	0.217795	0.438392	CD34 molecule
8751	ENSG00000143537	11719513_a_at	ADAM15	0.0736481	0.0410418	0.184998	-0.0248789	0.491515	0.602969	ADAM metallopeptidase domain 15
6386	ENSG00000137575	11757301_s_at	SDCBP	0.0729449	0.0430168	0.190244	-0.109127	0.00255001	0.0282961	syndecan binding protein (syntenin)
159963	ENSG00000148942	11758359_s_at	SLC5A12	0.0703073	0.0511533	0.2102	-0.0742012	0.0404381	0.183347	solute carrier family 5 (sodium/monocarboxylate cotransporter), member 12
7917	ENSG00000204463	11744473_x_at	BAG6	0.0639907	0.0759632	0.262161	-0.0693205	0.0557892	0.220863	BCL2-associated athanogene 6
5464	ENSG00000180817	11715684_a_at	PPA1	0.0630864	0.0802087	0.269944	0.0220677	0.54165	0.623049	Pyrophosphatase (Inorganic) 1
967	ENSG00000135404	11757417_x_at	CD63	0.0630512	0.0803778	0.27027	-0.0293103	0.417749	0.568986	CD63 molecule
57535	ENSG00000116299	11720780_a_at	KIAA1324	0.0622585	0.0842627	0.277124	-0.0556332	0.1255	0.339367	KIAA1324
6553	ENSG00000135740	11754538_x_at	SLC9A5	0.061135	0.0900269	0.286819	-0.0226108	0.532126	0.619485	solute carrier family 9, subfamily A (NHE5, cation proton antiporter 5), member 5
9452	ENSG00000078596	11742697_a_at	ITM2A	0.0593351	0.0999166	0.30261	-0.0365261	0.312024	0.509338	Integral membrane protein 2A
356	ENSG00000117560	11732555_at	FASLG	0.0568948	0.114685	0.324438	-0.052305	0.148039	0.367691	Fas ligand (TNF superfamily, member 6)
213	ENSG00000163631	11747269_a_at	ALB	0.0530547	0.141331	0.359617	-0.00914982	0.800216	0.70352	Albumin
1636	ENSG00000159640	11744189_a_at	ACE	0.052064	0.148922	0.36876	0.063944	0.0762444	0.262702	Angiotensin I converting enzyme
192670	ENSG00000134698	11759312_at	AGO4	0.0509975	0.157437	0.378344	-0.0775594	0.0318809	0.158892	argonaute RISC catalytic component 4
9567	ENSG00000100226	11719622_at	GTPBP1	0.0484267	0.179469	0.402098	0.0272656	0.451706	0.58528	GTP binding protein 1
59	ENSG00000107796	11722352_s_at	ACTA2	0.0477668	0.185477	0.408261	-0.0326476	0.36652	0.542539	Actin, alpha 2, smooth muscle, aorta
5393	ENSG00000123737	11726371_a_at	EXOSC9	0.0458052	0.204211	0.426034	0.0249844	0.489706	0.602216	Exosome component 9
733	ENSG00000176919	11731854_at	C8G	0.0454045	0.208202	0.429681	-0.0938825	0.00936829	0.0716072	Complement component 8, gamma polypeptide
4669	ENSG00000108784	11717852_at	NAGLU	0.043885	0.223845	0.443536	0.0362885	0.315162	0.511423	N-acetylglucosaminidase, alpha
5874	ENSG00000041353	11740235_at	RAB27B	0.0431581	0.231619	0.450249	-0.076782	0.0339568	0.165067	RAB27B, member RAS oncogene family
3860	ENSG00000171401	11747755_a_at	KRT13	0.0422781	0.241282	0.45806	-0.0314678	0.385038	0.55258	Keratin 13
345651	ENSG00000169067	11738454_at	ACTBL2	0.0420728	0.243578	0.459881	-0.011902	0.742185	0.688528	actin, beta-like 2
26027	ENSG00000162390	11730887_a_at	ACOT11	0.0396496	0.271822	0.481717	-0.0886286	0.0141488	0.0947155	Acyl-CoA thioesterase 11
93035	ENSG00000205038	11733361_a_at	PKHD1L1	0.0374318	0.299565	0.501071	-0.0433897	0.230178	0.449002	polycystic kidney and hepatic disease 1 (autosomal recessive)-like 1
54512	ENSG00000178896	11720077_at	EXOSC4	0.0355176	0.324976	0.517669	0.0304295	0.400323	0.560342	Exosome component 4
22824	ENSG00000164070	11728697_a_at	HSPA4L	0.0345346	0.338554	0.525897	-0.0476814	0.188857	0.411479	heat shock 70kDa protein 4-like
6317	ENSG00000057149	11729693_at	SERPINB3	0.0343399	0.341286	0.527587	0.00521122	0.885567	0.72385	serpin peptidase inhibitor, clade B (ovalbumin), member 3
23400	ENSG00000159363	11737163_a_at	ATP13A2	0.0342594	0.342421	0.528312	0.0441847	0.222582	0.442511	ATPase type 13A2
8218	ENSG00000070371	11750172_a_at	CLTCL1	0.0306256	0.396079	0.558231	0.04162	0.249251	0.464383	clathrin, heavy chain-like 1
118491	ENSG00000156042	11729100_a_at	TTC18	0.0305511	0.397229	0.558837	-0.0325737	0.36979	0.544236	Tetratricopeptide repeat domain 18
134526	ENSG00000172497	11740277_at	ACOT12	0.0296851	0.410752	0.56566	-0.0732789	0.042306	0.188435	Acyl-CoA thioesterase 12
8029	ENSG00000107611	11735086_x_at	CUBN	0.0295177	0.413396	0.566882	-0.00133125	0.970729	0.741385	cubilin (intrinsic factor-cobalamin receptor)
29126	ENSG00000120217	11753159_a_at	CD274	0.0272918	0.449514	0.584275	0.0120281	0.739573	0.687868	CD274 molecule
57471	ENSG00000136541	11739015_a_at	ERMN	0.0257233	0.475999	0.59618	-0.101864	0.0047165	0.0442625	ermin, ERM-like protein
10079	ENSG00000054793	11717216_a_at	ATP9A	0.0245277	0.49675	0.605086	0.0443232	0.219509	0.439835	ATPase, Class II, type 9A
8842	ENSG00000007062	11756660_a_at	PROM1	0.0236186	0.512843	0.611822	-0.0437606	0.226477	0.445778	prominin 1
3305	ENSG00000204390	11727138_a_at	HSPA1L	0.0231835	0.520642	0.614902	0.0320742	0.375034	0.547137	heat shock 70kDa protein 1-like
3674	ENSG00000005961	11731161_at	ITGA2B	0.0229383	0.525062	0.616673	-0.0681879	0.0599715	0.230053	integrin, alpha 2b (platelet glycoprotein IIb of IIb/IIIa complex, antigen CD41)
359	ENSG00000167580	11729930_at	AQP2	0.0207548	0.565259	0.632084	-0.0858938	0.0176484	0.109548	aquaporin 2 (collecting duct)
84076	ENSG00000151005	11724543_s_at	TKTL2	0.0199295	0.580827	0.637805	-0.061151	0.0910661	0.288491	transketolase-like 2
10058	ENSG00000115657	11716187_a_at	ABCB6	0.0194302	0.590341	0.641193	-0.00835067	0.817395	0.707782	ATP-binding cassette, sub-family B (MDR/TAP), member 6
9033	ENSG00000107593	11733755_at	PKD2L1	0.0185304	0.607667	0.647201	0.01588	0.660077	0.664496	Polycystic kidney disease 2-like 1
56915	ENSG00000077348	11716943_at	EXOSC5	0.0185026	0.608205	0.647379	0.0937559	0.00937624	0.0716478	Exosome component 5
5232	ENSG00000170950	11737752_at	PGK2	0.0182126	0.613839	0.649359	-0.000572171	0.9874	0.744542	Phosphoglycerate kinase 2
27243	ENSG00000130724	11729602_a_at	CHMP2A	0.0173955	0.629836	0.654752	0.06917	0.0560209	0.221404	Charged multivesicular body protein 2a
23405	ENSG00000100697	11719525_s_at	DICER1	0.0173091	0.631537	0.655312	-0.116577	0.0012389	0.0164652	dicer 1, ribonuclease type III
6406	ENSG00000124233	11716702_a_at	SEMG1	0.0172385	0.63293	0.655708	-0.048537	0.179061	0.401717	Semenogelin I
92747	ENSG00000125999	11720917_a_at	BPIFB1	0.0157076	0.663428	0.665586	0.0177844	0.622671	0.652417	BPI fold containing family B, member 1
9146	ENSG00000185359	11751648_a_at	HGS	0.0155579	0.666441	0.666465	0.0728163	0.0438872	0.192397	Hepatocyte growth factor-regulated tyrosine kinase substrate
6385	ENSG00000124145	11717638_at	SDC4	0.0134929	0.708537	0.679132	0.106518	0.00319217	0.0333672	Syndecan 4
933	ENSG00000012124	11754830_a_at	CD22	0.0120056	0.739427	0.687837	-0.102702	0.00443985	0.042382	CD22 molecule
58	ENSG00000143632	11743109_x_at	ACTA1	0.00914607	0.79997	0.703465	-0.0545473	0.130934	0.346654	Actin, alpha 1, skeletal muscle
222223	ENSG00000164659	11741802_a_at	KIAA1324L	0.00783591	0.82814	0.710421	-0.0486137	0.178562	0.401207	KIAA1324-like
6490	ENSG00000185664	11757418_a_at	PMEL	0.00737744	0.838052	0.712811	-0.0731059	0.0433441	0.191057	premelanosome protein
2939	ENSG00000244067	11757882_x_at	GSTA2	0.00399238	0.91193	0.729342	-0.0307077	0.395101	0.557719	Glutathione S-transferase alpha 2
6340	ENSG00000166828	11731973_at	SCNN1G	0.00328276	0.927536	0.732556	0.114855	0.00146092	0.0186549	sodium channel, non-voltage-gated 1, gamma subunit
8027	ENSG00000136738	11745306_a_at	STAM	0.0012155	0.973137	0.741825	0.0619188	0.0863086	0.280623	Signal transducing adaptor molecule (SH3 domain and ITAM motif) 1
55890	ENSG00000170412	11717742_a_at	GPRC5C	-0.000383686	0.991519	0.74525	-0.00305691	0.933119	0.73373	G protein-coupled receptor, family C, group 5, member C
113220	ENSG00000136883	11724174_at	KIF12	-0.00116748	0.974198	0.742035	0.0108422	0.764514	0.694512	Kinesin family member 12
9052	ENSG00000013588	11719792_at	GPRC5A	-0.00119941	0.973493	0.741897	0.0847383	0.0188834	0.114434	G protein-coupled receptor, family C, group 5, member A
1811	ENSG00000091138	11729214_a_at	SLC26A3	-0.00156989	0.965309	0.74023	0.0178053	0.622908	0.652489	solute carrier family 26 (anion exchanger), member 3
2938	ENSG00000243955	11724219_x_at	GSTA1	-0.00377761	0.91665	0.730289	0.0130054	0.720121	0.682489	Glutathione S-transferase alpha 1
3680	ENSG00000144668	11743421_at	ITGA9	-0.00497152	0.890453	0.724857	0.0752411	0.0377173	0.175874	integrin, alpha 9
3308	ENSG00000170606	11751837_a_at	HSPA4	-0.0055241	0.878367	0.722234	0.0227817	0.528848	0.618278	Heat shock 70kDa protein 4
221357	ENSG00000182793	11742635_x_at	GSTA5	-0.00619095	0.863819	0.7188	-0.0132669	0.714024	0.68075	GLUTATHIONE S-TRANSFERASE ALPHA 5
7538	ENSG00000128016	11715691_s_at	ZFP36	-0.00688	0.848836	0.715205	-0.0759781	0.0354976	0.169623	ZFP36 ring finger protein
27161	ENSG00000123908	11754098_a_at	AGO2	-0.00855529	0.812643	0.706618	0.0195262	0.589214	0.640799	argonaute RISC catalytic component 2
55507	ENSG00000111291	11743208_at	GPRC5D	-0.00931949	0.79626	0.702542	0.0083495	0.817444	0.707797	G protein-coupled receptor, family C, group 5, member D
1950	ENSG00000138798	11727113_at	EGF	-0.0106236	0.768511	0.695538	-0.0457881	0.205474	0.42718	Epidermal growth factor
57134	ENSG00000117643	11756191_a_at	MAN1C1	-0.0109798	0.760983	0.693579	0.0400533	0.267449	0.47854	Mannosidase, alpha, class 1C, member 1
23016	ENSG00000075914	11731563_a_at	EXOSC7	-0.0128962	0.720876	0.682683	-0.00164213	0.963806	0.739894	Exosome component 7
57826	ENSG00000123728	11724384_a_at	RAP2C	-0.0131599	0.715414	0.681159	0.0231026	0.523344	0.615983	RAP2C, member of RAS oncogene family
6550	ENSG00000066230	11735825_at	SLC9A3	-0.0142012	0.693988	0.674864	-0.0527299	0.14606	0.365368	solute carrier family 9, subfamily A (NHE3, cation proton antiporter 3), member 3
7288	ENSG00000104804	11726543_at	TULP2	-0.0169291	0.639045	0.657713	-0.0283946	0.432201	0.576057	Tubby like protein 2
54888	ENSG00000037474	11717461_a_at	NSUN2	-0.0189866	0.598855	0.644111	0.0847129	0.0189054	0.114513	NOP2/Sun RNA methyltransferase family, member 2
9373	ENSG00000137055	11743056_at	PLAA	-0.0201482	0.576682	0.636311	0.126505	0.000460995	0.00762755	Phospholipase A2-activating protein
5071	ENSG00000185345	11741869_x_at	PARK2	-0.0251916	0.485168	0.600298	0.0863661	0.0173914	0.108501	parkinson protein 2, E3 ubiquitin protein ligase (parkin)
6528	ENSG00000105641	11755588_a_at	SLC5A5	-0.0253917	0.481707	0.59873	-0.0376134	0.299718	0.501157	solute carrier family 5 (sodium/iodide cotransporter), member 5
344905	ENSG00000187527	11715203_s_at	ATP13A5	-0.0261107	0.469379	0.59326	0.0247706	0.493725	0.603882	ATPase type 13A5
140683	ENSG00000131050	11729770_at	BPIFA2	-0.0269213	0.455693	0.587139	-0.00408707	0.909916	0.728956	BPI fold containing family A, member 2
970	ENSG00000125726	11761421_at	CD70	-0.0289158	0.422991	0.571546	-0.00918145	0.799666	0.703376	CD70 molecule
8516	ENSG00000077943	11744251_a_at	ITGA8	-0.0345176	0.338793	0.526032	-0.0117809	0.744674	0.689183	integrin, alpha 8
10200	ENSG00000135698	11743466_at	MPHOSPH6	-0.0346898	0.336388	0.524652	0.0105712	0.770101	0.69596	M-phase phosphoprotein 6
160728	ENSG00000256870	11733985_at	SLC5A8	-0.0387283	0.283126	0.489792	0.0202969	0.574356	0.635461	solute carrier family 5 (sodium/monocarboxylate cotransporter), member 8
226	ENSG00000149925	11733097_x_at	ALDOA	-0.0404335	0.26245	0.474736	0.100327	0.00559213	0.0500115	Aldolase A, fructose-bisphosphate
6338	ENSG00000168447	11721417_at	SCNN1B	-0.0412194	0.253279	0.467505	0.069152	0.0569068	0.223398	sodium channel, non-voltage-gated 1, beta subunit
70	ENSG00000159251	11720489_a_at	ACTC1	-0.0425215	0.238582	0.455902	0.0536039	0.137716	0.355201	actin, alpha, cardiac muscle 1
6559	ENSG00000070915	11725270_at	SLC12A3	-0.043128	0.231945	0.450543	0.00681266	0.851126	0.715744	SOLUTE CARRIER FAMILY 12 (SODIUM/CHLORIDE TRANSPORTER), MEMBER 3
6318	ENSG00000206073	11730263_x_at	SERPINB4	-0.0447611	0.214727	0.43575	-0.0124633	0.730556	0.685456	serpin peptidase inhibitor, clade B (ovalbumin), member 4
3866	ENSG00000171346	11728288_a_at	KRT15	-0.0456337	0.205912	0.427585	-0.0246374	0.49543	0.604499	Keratin 15
84239	ENSG00000127249	11755829_a_at	ATP13A4	-0.0457372	0.204885	0.426659	0.0217386	0.548858	0.625949	ATPase type 13A4
348	ENSG00000130203	11744068_x_at	APOE	-0.0467378	0.19514	0.417481	0.109215	0.00249145	0.0278213	Apolipoprotein E
124975	ENSG00000167741	11758586_s_at	GGT6	-0.047655	0.18651	0.409284	-0.0368263	0.310463	0.508265	gamma-glutamyltransferase 6
4645	ENSG00000167306	11726454_s_at	MYO5B	-0.0492004	0.17261	0.394813	-0.0749585	0.0379479	0.176503	Myosin Vb
5314	ENSG00000170927	11732677_at	PKHD1	-0.0538888	0.135173	0.352011	-0.0602713	0.0979697	0.299601	polycystic kidney and hepatic disease 1 (autosomal recessive)
5817	ENSG00000073008	11737539_a_at	PVR	-0.0595695	0.0985818	0.300518	-0.0200837	0.578806	0.637072	Poliovirus receptor
3385	ENSG00000076662	11755072_a_at	ICAM3	-0.0600736	0.0957592	0.296024	-0.0227275	0.531259	0.61918	Intercellular adhesion molecule 3
688	ENSG00000102554	11744572_a_at	KLF5	-0.0603947	0.093995	0.293179	0.0700045	0.0530261	0.2146	Kruppel-like factor 5 (intestinal)
5420	ENSG00000128567	11715763_a_at	PODXL	-0.0610492	0.0904797	0.287506	0.0683412	0.0590163	0.228124	Podocalyxin-like
196441	ENSG00000133858	11743317_at	ZFC3H1	-0.0611442	0.0899782	0.286736	-0.0616658	0.0886348	0.284505	zinc finger, C3H1-type containing
6652	ENSG00000140263	11717339_s_at	SORD	-0.0621808	0.0846512	0.277822	0.0340661	0.34827	0.531803	Sorbitol dehydrogenase
54663	ENSG00000133316	11749380_a_at	WDR74	-0.06827	0.0582852	0.226486	0.121707	0.000725683	0.0108604	WD repeat domain 74
9445	ENSG00000136156	11715724_s_at	ITM2B	-0.0720438	0.0456641	0.196909	-0.0512056	0.156688	0.377509	Integral membrane protein 2B
10438	ENSG00000197223	11718174_x_at	C1D	-0.0731423	0.0424545	0.188807	0.0175725	0.627021	0.653884	C1D nuclear receptor corepressor
6558	ENSG00000064651	11724133_s_at	SLC12A2	-0.073161	0.0424016	0.188666	0.0482651	0.183617	0.406417	SOLUTE CARRIER FAMILY 12 (SODIUM/POTASSIUM/CHLORIDE TRANSPORTER), MEMBER 2
115752	ENSG00000166938	11744310_x_at	DIS3L	-0.0743275	0.0392071	0.179985	0.107683	0.00285413	0.0307494	DIS3 mitotic control homolog (S. cerevisiae)-like
5869	ENSG00000111540	11717194_a_at	RAB5B	-0.0785472	0.0293002	0.151037	0.0816292	0.0239357	0.133131	RAB5B, member RAS oncogene family
72	ENSG00000163017	11748016_a_at	ACTG2	-0.0901387	0.0123396	0.0864664	-0.0348687	0.334784	0.523676	actin, gamma 2, smooth muscle, enteric
374868	ENSG00000166377	11749366_a_at	ATP9B	-0.0932834	0.00959892	0.0728545	0.000631919	0.986097	0.744343	ATPase, Class II, type 9B
118460	ENSG00000223496	11735184_at	EXOSC6	-0.0955079	0.00800174	0.0642318	0.099065	0.00599273	0.0524766	Exosome component 6
257397	ENSG00000157625	11741815_a_at	TAB3	-0.0967998	0.00718733	0.0596334	0.104911	0.00359873	0.0364616	TGF-beta activated kinase 1/MAP3K7 binding protein 3
81618	ENSG00000135916	11753667_s_at	ITM2C	-0.0979714	0.00651383	0.0556555	0.191761	8.53123e-08	5.49775e-06	Integral membrane protein 2C
87178	ENSG00000138035	11734725_a_at	PNPT1	-0.0993387	0.00579987	0.0513086	0.0361925	0.317015	0.512612	Polyribonucleotide nucleotidyltransferase 1
10905	ENSG00000198162	11729793_at	MAN1A2	-0.0994481	0.00574594	0.0509702	0.084511	0.019102	0.115275	Mannosidase, alpha, class 1A, member 2
57393	ENSG00000147003	11722244_at	TMEM27	-0.104054	0.00384565	0.0382431	0.0970697	0.00714804	0.0594099	Transmembrane protein 27
5310	ENSG00000008710	11718716_s_at	PKD1	-0.104904	0.00356519	0.0362079	0.054629	0.131333	0.347127	polycystic kidney disease 1 (autosomal dominant)
51704	ENSG00000167191	11719176_a_at	GPRC5B	-0.106772	0.00301226	0.0319925	0.0873933	0.0163329	0.104192	G protein-coupled receptor, family C, group 5, member B
51013	ENSG00000171311	11756515_s_at	EXOSC1	-0.107618	0.00278865	0.0302224	0.0416883	0.249173	0.464326	Exosome component 1
494115	ENSG00000213516	11726095_at	RBMXL1	-0.114974	0.00139432	0.0180203	0.0717365	0.0466493	0.199329	RNA binding motif protein, X-linked-like 1
23404	ENSG00000130713	11736035_a_at	EXOSC2	-0.115056	0.00138326	0.0179119	0.145339	5.29326e-05	0.00132823	Exosome component 2
5172	ENSG00000091137	11737329_at	SLC26A4	-0.116872	0.00115838	0.0156298	0.092047	0.0115482	0.082685	solute carrier family 26 (anion exchanger), member 4
4931	ENSG00000143748	11752317_a_at	NVL	-0.118009	0.00103525	0.0143329	0.0567712	0.115833	0.326118	Nuclear VCP-like
653308	ENSG00000204147	11760913_at	ASAH2B	-0.14238	7.34918e-05	0.00173718	0.0816441	0.0238549	0.132857	N-acylsphingosine amidohydrolase (non-lysosomal ceramidase) 2B
5394	ENSG00000171824	11717510_a_at	EXOSC10	-0.145624	4.9924e-05	0.00126702	0.0594417	0.0996165	0.302154	Exosome component 10
22894	ENSG00000083520	11748232_a_at	DIS3	-0.148221	3.64153e-05	0.00097687	0.1141	0.00156732	0.0196559	DIS3 mitotic control homolog (S. cerevisiae)
25864	ENSG00000248487	11723542_a_at	ABHD14A	-0.148341	3.58834e-05	0.000964768	0.114803	0.00147414	0.0187812	Abhydrolase domain containing 14A
9230	ENSG00000185236	11756893_x_at	RAB11B	-0.153013	2.00649e-05	0.000595057	0.0725765	0.0447179	0.194529	RAB11B, member RAS oncogene family
9525	ENSG00000119541	11739262_at	VPS4B	-0.154497	1.66214e-05	0.000508837	0.0888264	0.0137898	0.0931118	vacuolar protein sorting 4 homolog B (S. cerevisiae)
139221	ENSG00000157502	11764221_s_at	MUM1L1	-0.157694	1.10139e-05	0.00036	0.0338605	0.348691	0.532065	Melanoma associated antigen (Mutated) 1-like 1
51010	ENSG00000107371	11722587_at	EXOSC3	-0.163016	5.45191e-06	0.000198778	0.133986	0.000201263	0.00393484	Exosome component 3
10987	ENSG00000121022	11754844_x_at	COPS5	-0.167319	3.03671e-06	0.000121149	0.0982796	0.00638677	0.0548799	COP9 signalosome subunit 5
3181	ENSG00000122566	11742680_at	HNRNPA2B1	-0.169133	2.3624e-06	9.79332e-05	-0.0328019	0.364667	0.541478	Heterogeneous nuclear ribonucleoprotein A2/B1
6717	ENSG00000075142	11744438_a_at	SRI	-0.180788	4.41413e-07	2.30756e-05	0.140467	9.45339e-05	0.00213624	Sorcin
27068	ENSG00000138777	11747013_a_at	PPA2	-0.200471	2.01327e-08	1.53043e-06	0.164519	4.78604e-06	0.000178164	pyrophosphatase (inorganic) 2
23589	ENSG00000153048	11720511_a_at	CARHSP1	-0.200627	1.96196e-08	1.49587e-06	0.142682	7.3069e-05	0.00172901	Calcium regulated heat stable protein 1, 24kDa
7251	ENSG00000074319	11715944_at	TSG101	-0.209535	4.35293e-09	3.8787e-07	0.201324	1.77654e-08	1.36958e-06	tumor susceptibility 101
27183	ENSG00000132612	11745333_a_at	VPS4A	-0.214315	1.88668e-09	1.82831e-07	0.148257	3.77883e-05	0.00100627	vacuolar protein sorting 4 homolog A (S. cerevisiae)
192669	ENSG00000126070	11739978_s_at	AGO3	-0.214924	1.69367e-09	1.65588e-07	0.157625	1.17639e-05	0.000380074	argonaute RISC catalytic component 3
230	ENSG00000109107	11724462_x_at	ALDOC	-0.223735	3.42844e-10	3.93737e-08	0.243288	8.22849e-12	1.32624e-09	Aldolase C, fructose-bisphosphate
27316	ENSG00000147274	11754432_x_at	RBMX	-0.231175	8.43804e-11	1.10483e-08	0.121967	0.000713955	0.0107252	RNA binding motif protein, X-linked
7086	ENSG00000163931	11754945_x_at	TKT	-0.243436	7.52182e-12	1.22191e-09	0.237376	3.029e-11	4.37575e-09	Transketolase
9798	ENSG00000182149	11748532_a_at	IST1	-0.249214	2.29681e-12	4.09563e-10	0.1594	9.26114e-06	0.000311705	increased sodium tolerance 1 homolog (yeast)
11340	ENSG00000120699	11717589_a_at	EXOSC8	-0.258802	2.99906e-13	6.24845e-11	0.107702	0.00281702	0.03045	Exosome component 8
6832	ENSG00000156502	11718860_a_at	SUPV3L1	-0.279453	2.79316e-15	8.07642e-13	0.253406	1.01755e-12	1.92617e-10	suppressor of var1, 3-like 1 (S. cerevisiae)
975	ENSG00000110651	11715394_s_at	CD81	-0.281964	1.53844e-15	4.62712e-13	0.153462	2.10236e-05	0.000618416	CD81 molecule
4653	ENSG00000034971	11743912_a_at	MYOC	-0.306441	3.32653e-18	1.47356e-15	0.19691	4.31348e-08	3.01062e-06	Myocilin, trabecular meshwork inducible glucocorticoid response
3329	ENSG00000144381	11757531_x_at	HSPD1	-0.323828	2.94743e-20	1.71588e-17	0.239868	1.73932e-11	2.63328e-09	heat shock 60kDa protein 1 (chaperonin)
23517	ENSG00000039123	11720465_a_at	SKIV2L2	-0.343998	8.22405e-23	6.81741e-20	0.201055	1.97831e-08	1.50633e-06	superkiller viralicidic activity 2-like 2 (S. cerevisiae)
762	ENSG00000167434	11730973_a_at	CA4	-0.347185	3.11864e-23	2.71905e-20	0.19135	1.04741e-07	6.57035e-06	Carbonic anhydrase IV
6517	ENSG00000181856	11734133_a_at	SLC2A4	-0.440414	7.12723e-38	4.1265e-34	0.422777	1.38511e-34	5.46007e-31	Solute carrier family 2 (Facilitated glucose transporter), member 4
