# Supplementary material for: Genetic regulation of exosome biogenesis pathway in human adipose and muscle tissue and association with obesity and insulin resistance
Source: Research Square preprint supplement (doi:10.21203/rs.3.rs-6580546/v1), 2025-07-11
Supplement: Supplementary file 7 [file 9ebe49d7c92c02260b38a6cf.xlsx]

## Sheet: S.Table-7
Supplementary Table 7: Validation of cis-eQTLs for exosome pathway genes in a meta-analysis of adipose tissue transcript data
Significant (P ≤ 1e-6) lead variants of top signal per gene from APEX meta-analysis of METSIM, FUSION, TwinsUK and GTEx cohort data from Brotman SM et al study (Nature Genetics, 2025) is shown.
'variant' indicates the chromosome_position(hg19)_refAllele_altAllele of the most significant variant associated with the gene for that signal.The alt allele is the effect allele. 'beta' is the variant to gene effect for the joint model with all signals.
pval_marginal is the p-value from the single-variant meta-analysis in total cohort or Eurpean only analysis shown. Almost all study participants (2,256 out of 2,344) were European ancestry
Results for the 42 of the 45 exoosme pathway cis-eGenes identified in AAGMEx (in S. table-6) and validated in the meta-analysis are shown.
human_entrez_gene	human_ensembl_gene	human_symbol	variant (All ancestry)	beta	se	pval_marginal	variant (European Ancestry)	beta	se	pval_marginal
54888	ENSG00000037474	NSUN2	5_6602544_T_C	-0.780552	0.0124139	3.12E-408	5_6605271_G_A	-0.789513	0.0127787	1.60E-392
118460	ENSG00000223496	EXOSC6	16_70285901_A_G	-0.788807	0.0149429	2.61E-387	16_70285901_A_G	-0.798209	0.0151811	3.20E-380
55240	ENSG00000115107	STEAP3	2_120048729_A_G	0.727031	0.0183887	1e-292	2_120048729_A_G	0.69142	0.017264	7.67e-288
635	ENSG00000145692	BHMT	5_78385845_T_G	0.702218	0.017429	2.32e-263	5_78397980_G_A	0.705973	0.0174634	3.92e-262
11332	ENSG00000097021	ACOT7	1_6455886_G_C	0.962923	0.0270602	1.43e-245	1_6430592_T_C	1.13774	0.0362332	1.42e-241
23589	ENSG00000153048	CARHSP1	16_8943551_C_T	0.447576	0.0165184	2.65e-142	16_8945705_C_G	0.435768	0.0160523	3.26e-144
4653	ENSG00000034971	MYOC	1_171618656_T_G	0.261702	0.0243391	4.36e-122	1_171617189_C_T	0.387389	0.0211475	7.04e-126
10905	ENSG00000198162	MAN1A2	1_118030256_T_G	-0.179681	0.00900857	5.37e-111	1_118030256_T_G	-0.212715	0.00895205	1.37e-111
115752	ENSG00000166938	DIS3L	15_66580853_C_T	-0.632299	0.0195683	3.22e-97	15_66580853_C_T	-0.642236	0.0197139	2.13e-95
4669	ENSG00000108784	NAGLU	17_40679718_C_T	0.223613	0.0103571	2.01e-89	17_40679718_C_T	0.22466	0.0104566	3.68e-88
118491	ENSG00000156042	CFAP70	10_74991561_A_G	-0.529161	0.0308493	8.06e-62	10_75132553_C_G	-0.502199	0.0339742	5.1e-47
3308	ENSG00000170606	HSPA4	5_132444128_G_A	-0.57389	0.0253774	4.12e-60	5_132444128_G_A	-0.577583	0.0255565	2.58e-59
26022	ENSG00000006042	TMEM98	17_31255616_G_A	-0.278676	0.0136389	1.23e-57	17_31255616_G_A	-0.282803	0.014182	2.09e-55
79026	ENSG00000124942	AHNAK	11_62192931_T_C	0.161228	0.010126	5.68e-54	11_62194412_C_A	0.162012	0.0102724	6.27e-53
970	ENSG00000125726	CD70	19_6611336_G_C	0.264011	0.0168316	1.63e-52	19_6611336_G_C	0.264289	0.0172135	2.14e-50
374868	ENSG00000166377	ATP9B	18_76819786_A_G	0.277292	0.0171404	8.25e-51	18_76819786_A_G	0.255545	0.0170133	2.05e-48
5873	ENSG00000069974	RAB27A	15_55600692_C_G	0.255873	0.0176645	8.32e-51	15_55600692_C_G	0.268492	0.0179353	1.58e-50
5819	ENSG00000130202	NECTIN2	19_45349402_T_C	-0.117582	0.00807137	7.24e-46	19_45347911_C_A	-0.119019	0.00815721	6.51e-46
5104	ENSG00000188488	SERPINA5	14_95047686_C_T	0.275062	0.0241833	3.33e-44	14_95042335_C_T	0.271379	0.0247199	1.1e-44
222223	ENSG00000164659	ELAPOR2	7_86726954_A_G	-0.464575	0.0428915	1.06e-31	7_86726954_A_G	-0.481846	0.0427931	1.62e-31
81618	ENSG00000135916	ITM2C	2_231685205_T_C	0.244311	0.0213411	1.86e-31	2_231685205_T_C	0.245064	0.0221599	1.05e-29
6386	ENSG00000137575	SDCBP	8_59456607_C_T	0.100019	0.00914193	3.92e-27	8_59459972_G_A	0.09997	0.00934267	5e-26
6553	ENSG00000135740	SLC9A5	16_67386349_C_G	0.219813	0.0237785	2.44e-25	16_67369722_A_G	0.214288	0.0248103	7.36e-23
358	ENSG00000240583	AQP1	7_30938167_G_A	-0.229838	0.0204887	3.56e-24	7_30938167_G_A	-0.245256	0.0217329	1.51e-24
3680	ENSG00000144668	ITGA9	3_37579734_G_A	-0.150881	0.0163916	3.92e-24	3_37579734_G_A	-0.155738	0.0165578	4.36e-25
5549	ENSG00000188783	PRELP	1_203421205_C_T	-0.140824	0.0171404	1.85e-22	1_203421205_C_T	-0.148676	0.0174574	5.81e-24
717	ENSG00000166278	C2	6_32278635_G_A	0.109538	0.0141526	3.33e-22	6_32278635_G_A	0.11573	0.014453	1.64e-23
51013	ENSG00000171311	EXOSC1	10_99173870_T_C	0.144481	0.0150657	2.4e-21	10_99173870_T_C	0.147256	0.0152463	1.32e-21
51010	ENSG00000107371	EXOSC3	9_37844468_A_G	-0.165972	0.0173309	2.71e-21	9_37844468_A_G	-0.166524	0.0176834	1.22e-20
23404	ENSG00000130713	EXOSC2	9_133579826_G_A	-0.377082	0.0525077	4.49e-15	9_133579826_G_A	-0.390545	0.0530939	1.54e-15
302	ENSG00000182718	ANXA2	15_60687152_T_G	-0.109561	0.0139676	1.2e-14	15_60687152_T_G	-0.106177	0.0143694	3.86e-13
3329	ENSG00000144381	HSPD1	2_198393044_G_C	-0.11732	0.0152793	2.45e-14	2_198393044_G_C	-0.111864	0.0150849	1.77e-13
5311	ENSG00000118762	PKD2	4_88949175_G_T	-0.0557967	0.00773114	7.39e-13	4_88949175_G_T	-0.0555047	0.0077902	1.44e-12
5768	ENSG00000116260	QSOX1	1_179985156_C_T	-0.133464	0.0152083	1.15e-12	1_180122985_T_C	-0.126561	0.0123124	4.01e-13
23016	ENSG00000075914	EXOSC7	3_45080570_T_G	0.0593465	0.0085513	5.2e-12	3_45080570_T_G	0.0589913	0.0086304	1.08e-11
23400	ENSG00000159363	ATP13A2	1_17289911_C_T	-0.0767178	0.0113129	1.54e-11	1_17338460_G_A	-0.0808831	0.0119496	1.7e-11
5420	ENSG00000128567	PODXL	7_131213110_A_G	0.152558	0.0242291	3.7e-10	7_131208707_G_A	0.152578	0.0246553	7.34e-10
71	ENSG00000184009	ACTG1	17_79466288_G_A	-0.0939335	0.0149183	3.7e-10	17_79466845_G_A	-0.091494	0.0143926	2.54e-10
3304	ENSG00000204388	HSPA1B	6_31826705_G_A	0.173466	0.0291378	3.18e-09	6_31826705_G_A	0.174729	0.0294001	6.81e-09
6337	ENSG00000111319	SCNN1A	12_6485035_G_C	0.120058	0.0206792	7.39e-09	12_6485661_T_C	0.108305	0.0212557	3.81e-07
5912	ENSG00000181467	RAP2B	3_152833680_A_C	-0.0608522	0.0112902	7.85e-08	3_152833680_A_C	-0.0609911	0.011356	8.74e-08
70	ENSG00000159251	ACTC1	15_35093232_T_C	-0.10662	0.0207259	2.94e-07	15_35093232_T_C	-0.11314	0.0211765	1.02e-07
