# Supplementary material for: Genetic regulation of exosome biogenesis pathway in human adipose and muscle tissue and association with obesity and insulin resistance
Source: Research Square preprint supplement (doi:10.21203/rs.3.rs-6580546/v1), 2025-07-11
Supplement: Supplementary file 8 [file c167ffaae461f219ec292ff2.xlsx]

## Sheet: S.Table-8
Supplementary Table 8: cis-eQTLs for exosome pathway genes in muscle tissue of African Americans (AAGMEX cohort).
Sorted list of probes representing transcripts of exosome pathway genes (sorted based on smallest cis-eQTL analysis p-values based on either directly genetyped or imputed SNPs).
MAF, Minor Allele Frequency; beta, effect size of minor allele; eQTL p value, significance in additive model (in MatrixEQTL analysis), FDR, FDP corrected P- value for directly genotyped SNPs.
Most significant directly genotyped or imputed cis-eSNP with MAF≥0.01 are shown.
Probe_ID	Entrez Gene_ID	Symbol	Probe Chr	Tx_Start	Tx_End	Smaller_P	SNP (direct)	dbsnp_rsid	SNP Chr1	SNP_Pos1	Minor Allele1	Major Allele1	MAF1	Beta1	P-value1	FDR1	SNP (imputed)	SNP Chr2	SNP_Pos2	Minor Allele2	Major Allele2	MAF2	Beta2	Pvalue2
ILMN_2345908	1663	DDX11	12	31226778	31257725	imputed	kgp3167802	rs7309189	12	31240960	G	A	0.3583	0.102051	2.02747e-43	1.74542e-38	rs4931424	12	31229317	T	C	0.3653	0.102126	1.81309e-43
ILMN_1652371	222223	KIAA1324L	7	86506222	86595291	imputed	rs6971856	rs6971856	7	86661802	C	T	0.3028	0.109274	9.01843e-28	3.09046e-23	rs6963589	7	86664267	A	G	0.3245	0.121985	8.64365e-43
ILMN_1670218	118460	EXOSC6	16	70284133	70285833	genotyped	rs4985407	rs4985407	16	70285901	A	G	0.1943	0.195526	2.72608e-40	2.07764e-35	rs775208	16	70315911	T	C	0.1837	0.19083	4.2381e-35
ILMN_1693259	10015	PDCD6IP	3	33840062	33911199	genotyped	kgp6743624	rs1141054	3	33840114	T	C	0.3525	-0.170756	7.96476e-30	3.20372e-25	rs9876986	3	33841065	A	G	0.3653	-0.164766	7.61756e-27
ILMN_2363586	6386	SDCBP	8	59465727	59495419	imputed	rs10102400	rs10102400	8	59462042	T	C	0.04453	-0.377666	2.07219e-15	1.93975e-11	rs116357042	8	59477416	A	T	0.04694	-0.487758	1.27441e-28
ILMN_1697736	23404	EXOSC2	9	133569146	133580281	genotyped	kgp18406120	rs150457636	9	133580239	T	C	0.03239	0.278505	2.58946e-27	8.34211e-23	chr9:133597218	9	133597218	G	T	0.03265	0.279062	2.87178e-27
ILMN_1805827	5464	PPA1	10	71962585	71993190	genotyped	kgp8084565	rs2184335	10	72006891	T	C	0.06073	0.379752	6.38989e-26	1.84208e-21	rs7089860	10	71992848	G	C	0.05918	0.379123	3.89516e-25
ILMN_1782545	6517	SLC2A4	17	7185053	7191367	imputed	kgp14016494	rs9894700	17	7191061	T	C	0.04453	0.182477	3.98695e-13	2.74484e-09	rs8073449	17	7181938	C	T	0.08163	0.184181	1.3081e-24
ILMN_1711899	302	ANXA2	15	60639349	60690185	imputed	kgp3723515	rs34319556	15	60713555	A	C	0.03239	0.240001	1.1152e-10	5.07659e-07	rs147092449	15	60689451	T	C	0.02449	0.407605	3.98426e-24
ILMN_2153916	3306	HSPA2	14	65007185	65009954	imputed	kgp10357353	rs1063391	14	65008251	T	C	0.4028	0.30463	1.11377e-12	7.1827e-09	rs10498515	14	65045056	T	C	0.4041	0.395108	1.76054e-20
ILMN_1750008	6832	SUPV3L1	10	70939959	70968854	genotyped	exm829854	rs33998366	10	70940052	T	C	0.1579	-0.114771	2.21761e-20	3.74066e-16	rs73278660	10	70967398	T	A	0.1571	-0.114373	5.02188e-20
ILMN_2411282	5768	QSOX1	1	180123967	180167169	imputed	rs3767199	rs3767199	1	180124667	C	A	0.4592	-0.0884035	7.09642e-11	3.37514e-07	rs34430949	1	180124634	T	C	0.4449	0.119546	4.44489e-20
ILMN_1660436	3304	HSPA1B	6	31795511	31798031	imputed	exm-rs534892	rs534892	6	31763942	G	C	0.2267	-0.362923	3.67105e-19	5.45434e-15	rs613165	6	31834398	A	G	0.2939	-0.325592	5.84805e-20
ILMN_1759910	5104	SERPINA5	14	95047705	95059457	imputed	kgp10146218	rs4905225	14	95073572	T	C	0.4595	-0.265977	5.97353e-14	4.61112e-10	rs1955657	14	95072648	G	A	0.4571	0.315463	8.20196e-20
ILMN_1766499	3306	HSPA2	14	65007185	65009954	imputed	kgp10357353	rs1063391	14	65008251	T	C	0.4028	0.328145	5.37184e-12	3.07708e-08	rs10498515	14	65045056	T	C	0.4041	0.417181	1.51736e-18
ILMN_1722634	4924	NUCB1	19	49403306	49426540	imputed	kgp21432101	rs35750589	19	49425651	G	C	0.02846	-0.470021	1.64196e-13	1.19789e-09	rs76779666	19	49426498	A	G	0.03265	-0.483773	1.74471e-18
ILMN_1747146	7251	TSG101	11	18501857	18548503	imputed	kgp9199378	rs11024711	11	18580058	C	T	0.3968	-0.0840766	8.51409e-13	5.5936e-09	rs1395319	11	18548183	G	T	0.3184	-0.0973763	7.74546e-16
ILMN_1784516	118491	TTC18	10	75013515	75118617	imputed	rs11000672	rs11000672	10	75241418	A	C	0.315	-0.0441448	7.01744e-15	6.15856e-11	rs12251843	10	75312064	A	G	0.3143	-0.0443389	5.0664e-15
ILMN_2341229	947	CD34	1	208059882	208084683	genotyped	kgp3258394	rs7572	1	208060009	T	C	0.2348	-0.260076	1.31384e-13	9.71052e-10	rs56404247	1	208055844	T	C	0.1612	-0.242144	2.91321e-09
ILMN_2396648	51013	EXOSC1	10	99195665	99205768	imputed	kgp21940655	rs29001317	10	99225886	T	G	0.02429	-0.283786	1.05063e-11	5.74047e-08	chr10:99185886	10	99185886	C	T	0.03469	-0.238687	4.85232e-13
ILMN_1677305	5817	PVR	19	45147097	45169428	imputed	rs13344893	rs13344893	19	45138246	T	C	0.3502	0.0477958	1.10424e-06	0.00194101	rs11540084	19	45147340	T	G	0.4041	0.063446	6.73836e-12
ILMN_1755134	3308	HSPA4	5	132387661	132440709	genotyped	kgp8738967	rs7728125	5	132370697	T	C	0.416	-0.0625017	8.22182e-11	3.84498e-07	rs10063390	5	132368739	G	A	0.4224	-0.0615607	8.94653e-11
ILMN_2052335	4653	MYOC	1	171604556	171621773	genotyped	rs235913	rs235913	1	171618656	A	C	0.1883	-0.248588	9.54573e-11	4.40102e-07	rs171000	1	171598082	G	T	0.2122	-0.217713	3.64287e-09
ILMN_1734194	51010	EXOSC3	9	37779710	37785089	imputed	rs10973537	rs10973537	9	37774893	A	G	0.2358	0.0494367	1.27006e-07	0.00029296	rs115269333	9	37804144	T	C	0.01837	0.182167	1.47829e-10
ILMN_2052331	4653	MYOC	1	171604556	171621773	genotyped	rs235913	rs235913	1	171618656	A	C	0.1883	-0.165579	3.4974e-10	1.45187e-06	rs171000	1	171598082	G	T	0.2122	-0.138262	5.21462e-08
ILMN_1813043	23743	BHMT2	5	78365546	78385897	imputed	rs575425	rs575425	5	78389912	C	T	0.4898	0.049838	5.64329e-08	0.000143358	rs623844	5	78369370	A	G	0.2878	0.0625972	1.93039e-09
ILMN_1659725	56915	EXOSC5	19	41892275	41903256	imputed	kgp4398451	rs2231940	19	41944237	C	T	0.1943	0.0644833	4.8403e-08	0.000125092	rs11670583	19	41920440	A	T	0.1673	0.0715577	3.21453e-08
ILMN_1667295	114990	VASN	16	4421848	4433529	imputed	rs4786482	rs4786482	16	4359421	A	G	0.05263	0.113039	0.000260701	0.145023	rs118021500	16	3660893	A	G	0.0102	0.372104	4.62567e-08
ILMN_1704961	71	ACTG1	17	79476996	79479892	imputed	rs9910792	rs9910792	17	79478916	T	G	0.3882	-0.120789	2.97387e-07	0.000620325	rs57018358	17	79480875	A	G	0.2449	-0.147956	4.75872e-08
ILMN_1736597	7086	TKT	3	53259652	53290130	genotyped	kgp3630307	rs184974745	3	53711837	A	C	0.01215	0.291101	1.25431e-07	0.000289623	rs73086256	3	53629476	C	G	0.02245	0.178059	2.08364e-05
ILMN_1740351	9798	IST1	16	71929395	71964540	imputed	rs8063324	rs8063324	16	71967599	T	G	0.3796	0.0615792	1.1484e-06	0.00200925	rs929866	16	72038363	T	C	0.4388	-0.0643975	1.42674e-07
ILMN_1795822	115752	DIS3L	15	66585632	66626236	imputed	rs7170930	rs7170930	15	66580853	T	C	0.04049	-0.195902	1.51192e-07	0.000341784	rs28474814	15	66578454	A	G	0.04082	-0.196123	1.48372e-07
ILMN_2055477	23016	EXOSC7	3	45017740	45052962	imputed	rs4683021	rs4683021	3	45044878	A	G	0.2692	-0.168831	1.25888e-06	0.00217494	rs4682761	3	45063549	A	G	0.3408	-0.164189	1.51683e-07
ILMN_1779182	26022	TMEM98	17	31254927	31268667	genotyped	kgp14069478	rs116750233	17	31259879	T	C	0.03644	-0.132443	2.24002e-07	0.000483463	rs142985945	17	31208116	A	G	0.03061	-0.141619	2.77774e-07
ILMN_2400219	6717	SRI	7	87834431	87849399	genotyped	kgp9411063	rs4141355	7	87844951	T	G	0.09717	-0.0783985	2.47389e-07	0.000527309	rs4141354	7	87844952	T	A	0.09796	-0.0775989	3.65645e-07
ILMN_2070521	23743	BHMT2	5	78365546	78385897	genotyped	rs476620	rs476620	5	78354446	A	G	0.2724	0.0635022	4.03837e-07	0.000807991	rs542721	5	78358432	G	C	0.2714	0.0633055	4.99863e-07
ILMN_1810608	87178	PNPT1	2	55861197	55921045	imputed	kgp14602245	rs1016039	2	55938113	C	T	0.33	0.0402943	2.70353e-06	0.00418918	rs782610	2	55935395	C	T	0.4306	0.0419762	4.71414e-07
ILMN_2339028	5310	PKD1	16	2138710	2185899	imputed	kgp16399483	rs12325450	16	2122546	T	C	0.1199	0.103634	5.69884e-05	0.0495789	rs13335638	16	2136624	T	C	0.4367	0.0808084	5.65976e-07
ILMN_1740265	11332	ACOT7	1	6324331	6445883	imputed	kgp15566870	rs115825782	1	6481802	G	T	0.06883	0.0680654	1.07346e-06	0.00189522	rs143465489	1	6455492	C	T	0.2347	0.041799	6.07199e-07
ILMN_2125869	58	ACTA1	1	229566992	229569843	imputed	kgp15467462	rs79167862	1	229031911	T	C	0.02227	-0.0790395	1.91483e-05	0.0212128	rs143325679	1	230058356	C	T	0.0102	-0.147033	6.1338e-07
ILMN_1680453	81618	ITM2C	2	231729664	231743969	imputed	rs1438145	rs1438145	2	231727399	G	A	0.4251	0.0592729	1.12062e-05	0.013771	rs934823	2	231732035	G	C	0.351	0.0682792	7.06996e-07
ILMN_1708946	27183	VPS4A	16	69345286	69358946	genotyped	kgp16531599	rs16958753	16	69358390	T	C	0.06504	-0.113668	7.72435e-07	0.00142353	rs145761403	16	69422797	T	C	0.07551	-0.105782	1.33572e-06
ILMN_1714023	6553	SLC9A5	16	67282854	67306094	genotyped	rs187431	rs187431	16	66906871	G	A	0.1896	0.0333854	8.15632e-07	0.00149078	rs3848281	16	66902366	G	A	0.1939	0.031088	1.71405e-06
ILMN_2052891	5311	PKD2	4	88928798	88998931	imputed	kgp11894109	rs74288545	4	89937351	C	A	0.01417	0.216885	8.52988e-07	0.00154898	rs72874198	4	89917864	A	G	0.01429	0.217386	8.17928e-07
ILMN_1718303	5819	PVRL2	19	45349392	45382198	imputed	kgp3179925	rs3810143	19	45349402	T	C	0.4919	0.0300924	1.2707e-05	0.0152512	rs12974942	19	45352487	T	A	0.4	-0.0329106	1.20177e-06
ILMN_2366041	81618	ITM2C	2	231729664	231743969	imputed	rs1438145	rs1438145	2	231727399	G	A	0.4251	0.0533408	1.67882e-06	0.00279453	rs934823	2	231732035	G	C	0.351	0.0553641	1.21187e-06
ILMN_1761566	84418	C5orf32	5	139554652	139623374	genotyped	kgp22811698	rs200302949	5	139623146	A	G	0.01012	0.533242	1.26401e-06	0.00218293	rs114636197	5	139888441	G	A	0.02857	0.300635	9.82856e-06
ILMN_1781360	10200	MPHOSPH6	16	82181766	82203829	imputed	rs2967355	rs2967355	16	82200103	A	C	0.04453	0.0579002	4.5677e-05	0.0418544	rs199661131	16	82177568	G	T	0.1163	0.0432205	1.37842e-06
ILMN_1660306	8516	ITGA8	10	15555947	15762334	imputed	kgp6559586	rs11597943	10	16449109	C	T	0.1984	0.0348409	0.0002573	0.143741	rs138114883	10	14918869	C	T	0.01837	0.139082	1.38994e-06
ILMN_1770293	688	KLF5	13	73632929	73651680	imputed	kgp6015564	rs2095646	13	74148368	T	C	0.2886	0.0316473	9.41789e-06	0.011929	rs9318196	13	74192248	A	G	0.3449	0.0323283	1.61324e-06
ILMN_1795325	72	ACTG2	2	74120092	74146780	genotyped	kgp2552346	rs115698014	2	74218679	G	T	0.01417	1.09666	1.70685e-06	0.00283159	rs145706649	2	73525541	A	G	0.03061	0.680304	5.60577e-06
ILMN_1786720	8842	PROM1	4	15969848	16077741	genotyped	kgp20794548	rs16891321	4	15050431	T	C	0.02024	0.262428	1.79464e-06	0.00295672	rs147680408	4	15053939	G	T	0.02041	0.2631	1.80587e-06
ILMN_1736002	10987	COPS5	8	67955314	67974562	imputed	kgp20347053	rs77656681	8	67662119	C	T	0.02632	0.226359	2.14392e-06	0.00343995	rs111847638	8	67741428	A	G	0.02653	0.226979	2.12748e-06
ILMN_2038777	60	ACTB	7	5566778	5570232	imputed	kgp13281788	rs115335524	7	4729618	T	C	0.01822	0.512355	5.04545e-05	0.0452332	rs28660578	7	4736229	A	G	0.02041	0.566705	2.19805e-06
ILMN_2053178	71	ACTG1	17	79476996	79479892	imputed	kgp10871591	rs11651976	17	79446368	G	A	0.17	0.0757482	1.46377e-05	0.0170905	rs8065136	17	79455342	A	G	0.3816	-0.0660979	2.50338e-06
ILMN_2390416	7917	BAG6	6	31606804	31620477	imputed	rs9267822	rs9267822	6	32170407	G	C	0.05894	-0.13528	2.91024e-06	0.00445449	rs9268628	6	32405865	C	A	0.1653	-0.0826582	2.73181e-06
ILMN_1669645	5310	PKD1	16	2138710	2185899	imputed	rs4984764	rs4984764	16	1194437	A	G	0.2308	-0.048656	0.000195867	0.120434	chr16:1205610	16	1205610	G	C	0.0102	0.260681	3.28703e-06
ILMN_1741148	226	ALDOA	16	30075599	30081741	imputed	exm1233394	rs33997546	16	30581676	A	C	0.04049	-0.0968973	0.00144701	0.368426	rs187460063	16	30605332	T	A	0.01224	-0.259446	3.53876e-06
ILMN_2212763	3385	ICAM3	19	10444451	10450345	imputed	kgp21407900	rs77489484	19	10444804	G	C	0.06275	-0.136865	6.33858e-05	0.0536847	rs114170067	19	10397133	T	C	0.05102	0.170851	3.57401e-06
ILMN_2369682	3181	HNRNPA2B1	7	26229555	26240413	imputed	rs17153945	rs17153945	7	26605282	T	C	0.1781	-0.089143	1.78512e-05	0.0200306	rs79457083	7	26606664	A	G	0.2	-0.0931548	3.71301e-06
ILMN_2152131	60	ACTB	7	5566778	5570232	imputed	kgp13281788	rs115335524	7	4729618	T	C	0.01822	0.504487	3.84734e-05	0.0367087	rs28660578	7	4736229	A	G	0.02041	0.535152	4.28836e-06
ILMN_1680129	54888	NSUN2	5	6599351	6633473	genotyped	rs477930	rs477930	5	6635882	A	C	0.4837	0.0590016	4.80641e-06	0.00680141	rs472402	5	6635591	C	G	0.4796	0.0577992	8.23004e-06
ILMN_1756982	1192	CLIC1	6	31698357	31704341	imputed	kgp26183097	rs141675386	6	30722015	T	G	0.03036	0.137409	0.00175827	0.400617	rs28674977	6	30771243	T	C	0.03673	0.154162	5.04037e-06
ILMN_1712636	4931	NVL	1	224415035	224517891	imputed	rs16845729	rs16845729	1	224459338	A	G	0.2045	-0.0325908	1.2901e-05	0.0154411	rs142720976	1	224496540	A	G	0.198	-0.0332141	8.79558e-06
ILMN_1681103	358	AQP1	7	30951414	30965131	genotyped	exm612529	rs2302340	7	30795331	G	A	0.09959	0.0848318	9.2275e-06	0.011727	rs74432030	7	30871384	T	A	0.202	-0.0533565	7.6026e-05
ILMN_2059452	6558	SLC12A2	5	127419482	127525380	genotyped	kgp1722722	rs11955288	5	127638759	G	A	0.1093	0.111062	1.0028e-05	0.0125662	rs2307110	5	127637362	G	A	0.1102	0.110716	1.05736e-05
ILMN_2349831	23405	DICER1	14	95552564	95624347	genotyped	kgp19616595	rs115009824	14	96374901	C	T	0.04675	-0.107388	1.13492e-05	0.0139169	rs114997858	14	96386688	G	C	0.04694	-0.103569	2.11915e-05
ILMN_1799796	22894	DIS3	13	73329539	73356266	imputed	kgp16662712	rs115175893	13	73532173	G	A	0.02429	0.0810636	1.26541e-05	0.0151985	chr13:73523436	13	73523436	T	G	0.02449	0.0813776	1.15455e-05
ILMN_1765409	8027	STAM	10	17686123	17758821	imputed	rs4748457	rs4748457	10	18672145	G	T	0.1619	-0.0384608	0.0010158	0.313028	rs111301056	10	17688606	A	G	0.05306	0.088366	1.20147e-05
ILMN_2395692	5071	PARK2	6	161768589	163148834	imputed	rs10806762	rs10806762	6	163094923	C	A	0.05894	0.0519753	0.000163332	0.106377	rs149295813	6	162170203	A	G	0.03061	0.0811807	1.2321e-05
ILMN_1708936	51010	EXOSC3	9	37779710	37785089	imputed	rs1324195	rs1324195	9	37790127	T	G	0.4858	0.0383212	6.2396e-05	0.0530617	rs10814623	9	37792627	G	C	0.4694	0.0409994	1.39979e-05
ILMN_1739734	8218	CLTCL1	22	19166986	19279239	imputed	exm1584871	rs1061325	22	19184095	C	T	0.2439	-0.070499	2.63925e-05	0.0274174	chr22:19263543	22	19263543	T	A	0.3531	0.0632587	1.4341e-05
ILMN_1813117	3680	ITGA9	3	37493812	37861281	genotyped	kgp18097861	rs2234604	3	38401956	T	C	0.03441	0.0650716	1.52353e-05	0.0176452	rs80295410	3	38392836	G	C	0.03469	0.0652844	1.53573e-05
ILMN_1658684	374868	ATP9B	18	76829396	77138282	genotyped	kgp16007084	rs111831257	18	77134121	C	T	0.0122	0.129506	1.52615e-05	0.0176705	rs150140810	18	76639849	G	A	0.02041	0.100334	1.76842e-05
ILMN_1792679	3678	ITGA5	12	54789044	54813050	imputed	kgp18844681	rs78600587	12	55225368	G	A	0.0668	0.0607716	2.67971e-05	0.0277484	rs147546111	12	54770203	G	C	0.01633	0.122363	1.59877e-05
ILMN_1714511	5071	PARK2	6	161768589	163148834	genotyped	kgp17190631	rs9458389	6	162239871	A	T	0.1113	0.0642452	1.61764e-05	0.0185124	rs9458388	6	162239633	C	G	0.1122	0.0637924	1.99058e-05
ILMN_1687785	27068	PPA2	4	106290233	106395227	imputed	rs7671891	rs7671891	4	106366687	T	C	0.2267	0.0605537	6.04782e-05	0.0518483	rs2130693	4	106330281	A	G	0.4816	-0.0583109	1.75387e-05
ILMN_1792587	9525	VPS4B	18	61056424	61089752	imputed	rs435439	rs435439	18	60290539	C	T	0.3138	-0.0389736	3.28628e-05	0.0325602	rs73468714	18	61034885	C	G	0.02041	0.137691	1.911e-05
ILMN_1721713	5393	EXOSC9	4	122722471	122738176	genotyped	kgp20820671	rs1507987	4	122737873	G	A	0.2073	-0.0498057	1.92478e-05	0.0213033	rs1507988	4	122737472	T	C	0.2082	-0.0483777	3.3559e-05
ILMN_2184184	301	ANXA1	9	75766780	75785307	imputed	kgp18629124	rs11143700	9	76391127	C	T	0.1478	0.163799	0.000578158	0.233402	rs73483937	9	75681252	G	A	0.07959	0.265626	2.00751e-05
ILMN_1806165	3310	HSPA6	1	161494035	161496687	imputed	kgp6204357	rs78968408	1	160581292	A	G	0.01215	0.168856	0.000565791	0.230824	rs116501452	1	160539751	G	A	0.01224	0.207175	2.12102e-05
ILMN_1716524	7879	RAB7A	3	128444978	128533641	imputed	kgp10888118	rs9850875	3	128545776	T	C	0.2166	-0.067262	0.000309913	0.161709	rs57173847	3	128553336	T	A	0.4429	-0.0625253	2.22632e-05
ILMN_1737242	733	C8G	9	139839697	139841426	imputed	kgp18435092	rs116656454	9	139251134	A	G	0.02227	-0.101231	0.000149109	0.0998804	rs148292507	9	139589647	T	C	0.0551	0.0716319	2.23828e-05
ILMN_1740938	348	APOE	19	45409005	45412652	imputed	rs10406189	rs10406189	19	45178112	C	T	0.03846	0.137453	0.00137361	0.360174	rs116720206	19	45200405	A	G	0.02857	0.208931	2.30818e-05
ILMN_1762932	27243	CHMP2A	19	59062932	59066370	genotyped	kgp2590204	rs1867726	19	59084306	G	T	0.102	0.0560449	2.52401e-05	0.0264617	rs73068321	19	59072020	A	G	0.1061	0.0531099	5.54645e-05
ILMN_1695719	27161	EIF2C2	8	141541263	141645646	imputed	kgp212258	rs2977461	8	141541288	C	T	0.3959	-0.0486428	0.000260031	0.144777	rs6578168	8	142384564	C	A	0.04694	0.125484	2.86213e-05
ILMN_1663042	6385	SDC4	20	43953928	43977064	imputed	exm1544796	rs73305953	20	44141400	G	A	0.09514	0.0825818	0.000762839	0.270816	rs8123316	20	44127202	G	A	0.1367	0.0844554	2.93397e-05
ILMN_3243156	113146	AHNAK2	14	105403590	105444694	imputed	kgp3301729	rs75573399	14	105147285	A	G	0.01215	0.118261	0.000519756	0.220338	chr14:105417548	14	105417548	C	G	0.0102	0.154578	3.24187e-05
ILMN_1712888	10808	HSPH1	13	31709110	31736158	imputed	kgp2913636	rs17075261	13	31567672	C	T	0.1255	-0.118743	0.00121499	0.340911	rs111373465	13	31732729	A	G	0.01633	0.398017	3.51043e-05
ILMN_1695423	928	CD9	12	6309481	6347437	genotyped	kgp10632458	rs2072370	12	6345080	G	A	0.1559	0.0889824	4.02359e-05	0.0379727	rs10744702	12	6349127	G	A	0.1551	0.0873547	6.17269e-05
ILMN_1810387	9373	PLAA	9	26903367	26947468	imputed	kgp6370233	rs4978101	9	26751101	A	G	0.03878	-0.0735906	9.07953e-05	0.0703468	rs57749825	9	27610354	C	T	0.2367	0.0338136	4.55999e-05
ILMN_2409167	302	ANXA2	15	60639349	60690185	imputed	kgp20036388	rs74940659	15	59991169	G	A	0.03036	0.324524	0.000226469	0.132516	rs6151550	15	59962934	A	C	0.03673	0.327377	5.04771e-05
ILMN_2312719	5393	EXOSC9	4	122722471	122738176	imputed	rs2706797	rs2706797	4	122757991	C	T	0.2053	-0.0526404	0.000503511	0.21625	rs140107024	4	121762094	T	C	0.02041	-0.16556	5.38087e-05
ILMN_1715994	9146	HGS	17	79650961	79669151	imputed	kgp2708854	rs35187078	17	80588945	C	T	0.07895	-0.078468	0.000268061	0.147609	rs80293025	17	80060428	T	G	0.07755	0.0879616	5.56881e-05
ILMN_2402168	5394	EXOSC10	1	11126675	11159938	imputed	rs556506	rs556506	1	10740626	T	G	0.1599	0.0633633	0.00070423	0.259588	rs183507097	1	11751624	A	C	0.01224	0.255912	5.78937e-05
ILMN_2353978	26027	ACOT11	1	55013806	55100417	imputed	kgp15883847	rs599747	1	54738284	T	C	0.04049	0.0542129	0.000319874	0.164904	chr1:56013760	1	56013760	C	G	0.0102	0.122449	5.81989e-05
ILMN_1772692	23405	DICER1	14	95552564	95624347	imputed	kgp19598156	rs73329781	14	95575037	A	G	0.2368	0.0508038	0.000426843	0.196153	rs73329795	14	95580329	A	G	0.2184	0.0590241	5.91193e-05
ILMN_2169439	3685	ITGAV	2	187454789	187545629	imputed	kgp11385670	rs35443615	2	187954958	C	T	0.3138	-0.0681824	0.000452082	0.203063	rs146124495	2	186879908	C	G	0.01429	0.293281	5.92158e-05
ILMN_2089073	10079	ATP9A	20	50213313	50384908	genotyped	kgp2086013	rs2869447	20	50368595	C	A	0.3347	0.106051	6.08322e-05	0.0520869	rs4991625	20	50368596	C	A	0.3245	0.102069	0.000102479
ILMN_1776857	358	AQP1	7	30951414	30965131	imputed	kgp297762	rs38331	7	31650837	T	G	0.03644	0.0676961	0.00239309	0.452301	rs2041515	7	31917930	C	T	0.02857	0.0995087	6.12868e-05
ILMN_1773865	3309	HSPA5	9	127997126	128003666	genotyped	kgp8966694	rs12009	9	127997303	A	G	0.4959	-0.0305724	6.66264e-05	0.0557416	rs1140763	9	127997592	A	G	0.4959	-0.0284624	0.000225005
ILMN_1654566	3305	HSPA1L	6	31777395	31782835	imputed	kgp3223415	rs707938	6	31729359	A	G	0.3776	0.0502999	0.000191216	0.118447	rs137937662	6	31945415	T	C	0.0102	-0.249696	7.45311e-05
ILMN_2364864	4151	MB	22	36002810	36013384	genotyped	kgp15054247	rs113899325	22	36883724	C	T	0.02227	-0.0998263	7.83748e-05	0.0629814	rs28620356	22	35882540	T	C	0.3224	-0.0313827	0.000378222
ILMN_1731135	9230	RAB11B	19	8455204	8469317	imputed	kgp21379365	rs75039994	19	8585041	A	G	0.04049	-0.0435152	0.000563156	0.230167	rs193195018	19	7790411	T	G	0.01837	-0.0679456	8.32797e-05
ILMN_1740917	6338	SCNN1B	16	23313590	23392620	imputed	kgp6891152	rs12926455	16	23033199	C	T	0.1291	-0.0244075	0.000744589	0.267176	rs16976791	16	22731194	C	A	0.07551	-0.0379753	8.33492e-05
ILMN_1732799	947	CD34	1	208059882	208084683	imputed	kgp15525252	rs17046685	1	207870975	A	G	0.01619	0.360267	9.33722e-05	0.0717098	rs149829330	1	207874634	G	C	0.01633	0.361268	9.23393e-05
ILMN_1777296	60	ACTB	7	5566778	5570232	imputed	kgp13281788	rs115335524	7	4729618	T	C	0.01822	0.463589	0.000137248	0.0942347	rs375528504	7	5826339	T	C	0.02857	0.380029	9.78048e-05
ILMN_1809477	23589	CARHSP1	16	8946798	8962258	imputed	rs4985054	rs4985054	16	8945568	A	G	0.3178	0.0320516	0.000272194	0.149091	rs11077277	16	8310819	A	G	0.102	0.0479178	9.89652e-05
ILMN_1769822	9373	PLAA	9	26903367	26947468	imputed	rs623893	rs623893	9	26257238	C	T	0.2105	-0.0216267	0.000425903	0.195893	rs12351621	9	26111873	A	G	0.0551	-0.0405084	0.0001009
ILMN_2383349	55240	STEAP3	2	119981383	120023227	imputed	kgp11288071	rs162679	2	119407150	T	C	0.3704	0.0411327	0.00193249	0.416595	rs141778844	2	119462398	G	A	0.0102	-0.248284	0.000107041
ILMN_3241758	728378	POTEF	2	130831107	130886795	imputed	kgp14757267	rs116276170	2	129865938	A	G	0.03862	0.273204	0.000298014	0.157763	rs7561007	2	129905527	G	A	0.01224	0.562626	0.000107125
ILMN_1694584	8218	CLTCL1	22	19166986	19279239	imputed	exm1584871	rs1061325	22	19184095	C	T	0.2439	-0.0687079	0.000250262	0.141264	rs114528064	22	19180408	C	G	0.04694	0.139279	0.000107912
ILMN_1766334	4151	MB	22	36002810	36019401	imputed	kgp15107915	rs115598831	22	36550975	A	G	0.06073	-0.144117	0.000452294	0.203116	rs139521974	22	36992993	T	C	0.01224	0.347625	0.000115517
ILMN_1677404	5911	RAP2A	13	98086474	98120252	imputed	kgp16560934	rs77984230	13	98496849	C	A	0.08097	0.105078	0.00034736	0.17315	rs9556892	13	98831351	G	C	0.02857	0.178075	0.000123778
ILMN_1771333	961	CD47	3	107761940	107809935	imputed	kgp17914617	rs78539225	3	108613475	T	G	0.04858	0.0851505	0.0011791	0.336101	rs140831644	3	108294136	C	T	0.02449	0.138065	0.00012632
ILMN_1690733	1950	EGF	4	110834039	110934118	imputed	kgp4979930	rs78671698	4	110149840	A	G	0.008097	0.465359	0.000298696	0.157981	rs146487224	4	111203128	T	C	0.03878	0.231669	0.000131781
ILMN_1766171	11267	SNF8	17	47007458	47022154	genotyped	kgp14053481	rs80197407	17	47674465	G	A	0.03036	-0.166868	0.00013361	0.0924816	rs115477578	17	47944459	T	C	0.04286	-0.127897	0.000650332
ILMN_1724211	55890	GPRC5C	17	72427666	72443568	imputed	rs9890368	rs9890368	17	71547505	T	C	0.3664	0.0308968	0.000281405	0.152198	rs56074902	17	72411423	C	T	0.2694	0.0358171	0.000133905
ILMN_2342455	27068	PPA2	4	106290233	106395227	imputed	kgp6450712	rs62317286	4	106408838	G	A	0.01619	0.210777	0.00115244	0.332509	rs139096617	4	106346572	C	T	0.01429	0.323131	0.000137066
ILMN_2051408	87178	PNPT1	2	55861197	55921045	imputed	kgp14729242	rs192757715	2	56345751	A	G	0.02632	0.166006	0.000326779	0.166923	rs59778045	2	55354037	C	T	0.2163	0.0692012	0.000144487
ILMN_1774528	55890	GPRC5C	17	72427666	72443568	genotyped	kgp6621333	rs56995664	17	71799960	C	T	0.3036	-0.0230272	0.000148585	0.0996328	rs28621553	17	71801578	A	G	0.3041	-0.0223986	0.000212236
ILMN_1689953	975	CD81	11	2398546	2418649	genotyped	kgp12864901	rs77086135	11	1454901	T	C	0.07287	-0.183889	0.000149082	0.0998666	rs114095240	11	1458077	T	C	0.02041	-0.328176	0.000279037
ILMN_1734550	6550	SLC9A3	5	473333	524549	imputed	rs6887705	rs6887705	5	911236	T	C	0.05263	0.0418009	0.000296102	0.157077	rs116412595	5	1403486	C	T	0.0551	-0.0445396	0.000150059
ILMN_1714567	79026	AHNAK	11	62283373	62314332	imputed	kgp13055172	rs112534450	11	62433224	T	G	0.01822	0.24306	0.000245909	0.13967	rs112186006	11	62422727	G	A	0.01633	0.265615	0.000150897
ILMN_1815308	6382	SDC1	2	20400557	20425194	imputed	kgp1017040	rs77367405	2	19513699	A	G	0.1073	0.0371114	0.000426819	0.196148	rs112926117	2	20767918	G	C	0.0551	0.0560742	0.000151801
ILMN_1752582	5869	RAB5B	12	56367794	56390467	imputed	rs773108	rs773108	12	56369911	G	A	0.08704	-0.119543	0.000209821	0.126077	rs2048036	12	56380119	A	T	0.08367	-0.128179	0.000154917
ILMN_1674243	7037	TFRC	3	195776154	195808961	imputed	kgp8564818	rs73203718	3	196420628	T	G	0.04453	-0.604338	0.000219323	0.129753	chr3:195815213	3	195815213	A	G	0.03878	-0.696128	0.000156368
ILMN_1739594	26027	ACOT11	1	55013806	55076005	genotyped	kgp11646150	rs2764829	1	55201438	G	A	0.1667	0.113138	0.000156718	0.10337	rs79305519	1	55758583	A	G	0.0449	0.192153	0.000388716
ILMN_3178792	3181	HNRNPA2B1	7	26229555	26240413	imputed	kgp242251	rs17153020	7	26044272	A	G	0.1943	0.0746076	0.0003335	0.169045	rs76560590	7	25932065	T	C	0.102	0.105915	0.000157599
ILMN_1683883	95	ACY1,ABHD14A-ACY1	3	52017299	52023218	imputed	kgp18122562	rs114406523	3	52021524	G	A	0.03644	-0.125471	0.00111215	0.326828	rs60875614	3	52052381	A	G	0.08571	0.102312	0.000170647
ILMN_1755937	302	ANXA2	15	60639349	60690185	imputed	kgp20036388	rs74940659	15	59991169	G	A	0.03036	0.0588325	0.0003091	0.161428	rs147340527	15	59947091	T	C	0.02857	0.0633865	0.000171539
ILMN_1705364	7917	BAG6	6	31606804	31620477	genotyped	exm534001	rs61737606	6	32016167	T	C	0.01215	-0.15339	0.000174242	0.111162	rs144026078	6	32014806	A	G	0.01224	-0.153356	0.00018571
ILMN_1745271	54512	EXOSC4	8	145133521	145135551	imputed	kgp20173473	rs115505421	8	145595176	G	A	0.06275	-0.0416297	0.000834219	0.283858	rs75796866	8	144663165	A	G	0.01837	0.0798338	0.000174692
ILMN_2193980	10058	ABCB6	2	220074487	220083712	genotyped	kgp12344837	rs11890588	2	220438312	C	T	0.3374	-0.0565984	0.000175089	0.11153	rs114303693	2	219304404	A	G	0.02449	0.15506	0.000441209
ILMN_1803136	53916	RAB4B,MIA-RAB4B	19	41284123	41302849	genotyped	kgp3180808	rs10853734	19	40431814	C	G	0.08097	0.0344229	0.000185636	0.116054	rs8102720	19	40843938	A	T	0.4959	0.0185057	0.000394446
ILMN_1720996	6558	SLC12A2	5	127419482	127525380	imputed	kgp22540183	rs17164674	5	127104503	A	G	0.0874	-0.123632	0.00165387	0.390388	rs12173229	5	127264598	T	C	0.2306	0.0941302	0.00020431
ILMN_2050790	91894	HSPB2-C11orf52,C11orf52	11	111789600	111797595	imputed	kgp12804719	rs114156860	11	111125510	G	A	0.01619	0.0703964	0.000395072	0.187209	rs74952409	11	111117809	C	T	0.02653	0.0581679	0.000212179
ILMN_1694980	4669	NAGLU	17	40687950	40696466	imputed	kgp9660085	rs963986	17	40561579	C	G	0.1215	0.0347206	0.000476389	0.209471	rs9903348	17	39970940	T	A	0.1347	-0.0338007	0.000224803
ILMN_3251723	87178	PNPT1	2	55861197	55921045	imputed	kgp14283799	rs114934875	2	55338933	T	C	0.02227	0.228367	0.000517798	0.219832	rs72916779	2	55439484	C	G	0.04694	0.171466	0.00023316
ILMN_2363591	6386	SDCBP	8	59465727	59495419	imputed	kgp6870736	rs76239937	8	59397751	A	G	0.01417	-0.207938	0.000555293	0.228731	rs17297508	8	59825065	G	A	0.02245	-0.205747	0.00023908
ILMN_1677314	4582	MUC1	1	155158299	155162706	imputed	rs11264296	rs11264296	1	154994750	C	T	0.378	0.0220759	0.000369835	0.17989	rs112654386	1	155499300	G	A	0.2041	0.0274918	0.000241409
ILMN_1677824	5867	SPHAR,RAB4A	1	229406808	229441640	imputed	rs10737440	rs10737440	1	229415637	A	G	0.2733	-0.0409083	0.00204439	0.425916	rs17381050	1	230241977	C	G	0.0102	-0.20866	0.000241466
ILMN_2413158	5420	PODXL	7	131185020	131241376	imputed	kgp8026645	rs11769507	7	131628701	T	C	0.2012	0.067606	0.000706369	0.260039	rs115782392	7	130505134	C	A	0.03878	-0.140059	0.000250281
ILMN_1803590	196441	ZFC3H1	12	72003378	72057749	imputed	kgp11104874	rs74101511	12	71029680	G	A	0.04858	-0.04872	0.00186423	0.410523	rs142831820	12	71317668	C	T	0.03265	-0.0683956	0.000255041
ILMN_1732468	22824	HSPA4L	4	128703452	128754526	imputed	rs1216412	rs1216412	4	129529604	G	A	0.2967	0.0200079	0.00115063	0.332306	rs2391094	4	127731616	T	A	0.4245	-0.0211096	0.000255442
ILMN_1756920	8751	ADAM15	1	155023747	155035252	genotyped	rs11264972	rs11264972	1	154034593	T	C	0.02227	-0.243146	0.000255989	0.14324	rs36004974	1	154818403	G	A	0.1429	-0.0925224	0.000765399
ILMN_1756162	11340	EXOSC8	13	37574677	37583751	imputed	kgp11940367	rs4943516	13	38087213	A	G	0.1761	-0.075825	0.000428864	0.196638	rs9532077	13	38111146	G	A	0.4857	-0.0576215	0.000259416
ILMN_2337336	5819	PVRL2	19	45349392	45392485	imputed	kgp3179925	rs3810143	19	45349402	T	C	0.4919	0.0194549	0.000650025	0.24855	rs2927467	19	45358499	A	G	0.01224	0.0784995	0.000259701
ILMN_2270845	54663	WDR74	11	62600382	62607628	imputed	kgp6120517	rs1792863	11	61996308	C	T	0.1741	0.0375873	0.00273575	0.47476	rs138294628	11	61668028	T	C	0.01224	0.161865	0.000263457
ILMN_1774410	3329	HSPD1	2	198351307	198364998	imputed	kgp14167166	rs116611063	2	198656128	G	A	0.01619	0.066799	0.000758154	0.269789	rs10189909	2	198190384	T	C	0.01633	0.0717111	0.000268941
ILMN_1658383	3310	HSPA6	1	161494035	161496687	genotyped	kgp11254859	rs4131826	1	161282384	C	T	0.08704	0.0369161	0.000271735	0.148911	rs147941442	1	161608281	T	C	0.03061	0.0543465	0.00127083
ILMN_1748386	4151	MB	22	36002810	36013555	imputed	rs7284919	rs7284919	22	36652164	C	T	0.1113	-0.129905	0.000341521	0.17141	rs739299	22	35514825	C	T	0.2286	0.091461	0.000284066
ILMN_1671703	59	ACTA2	10	90694830	90712580	imputed	rs10887936	rs10887936	10	91017996	A	G	0.2308	-0.245057	0.0032466	0.503373	rs138618929	10	90687970	G	A	0.02653	0.767535	0.000284955
ILMN_1713807	57134	MAN1C1	1	25943958	26112698	genotyped	kgp1148498	rs6600257	1	25472465	A	G	0.418	-0.0244709	0.000289711	0.154914	rs116581099	1	25193857	G	A	0.07347	-0.0471418	0.000307989
ILMN_1784367	3329	HSPD1	2	198351307	198364640	imputed	kgp9213889	rs10207232	2	198893813	A	G	0.1551	-0.030917	0.00511151	0.577939	rs2043016	2	198146381	C	T	0.402	0.0298015	0.000291589
ILMN_2352090	55890	GPRC5C	17	72429835	72443568	imputed	kgp395956	rs58513901	17	72429019	G	A	0.17	-0.0824144	0.000353797	0.17507	rs73997726	17	72426894	C	A	0.1694	-0.0832201	0.00029259
ILMN_1792075	933	CD22	19	35820071	35838264	imputed	kgp9182509	rs74898370	19	36484417	T	C	0.01822	0.067763	0.000589915	0.236039	rs79879853	19	36477304	A	G	0.02041	0.0681412	0.0002976
ILMN_1761049	192669	EIF2C3	1	36396682	36522063	genotyped	kgp9009254	rs61768876	1	37449685	A	G	0.01822	0.0708972	0.00030662	0.160625	rs72915042	1	37031686	A	G	0.03265	-0.0488706	0.00105355
ILMN_1807300	5311	PKD2	4	88928798	88998931	imputed	kgp11894109	rs74288545	4	89937351	C	A	0.01417	0.0726304	0.000320301	0.165026	rs72874198	4	89917864	A	G	0.01429	0.0728118	0.000320197
ILMN_1694249	947	CD34	1	208059882	208084683	imputed	rs701610	rs701610	1	208619842	T	C	0.1417	-0.0230194	0.00093364	0.300021	chr1:208045429	1	208045429	A	C	0.01633	0.0690182	0.000331025
ILMN_1756779	1213	CLTC	17	57697049	57774317	imputed	kgp13910737	rs73325167	17	57479125	A	G	0.01822	0.073902	0.00181815	0.406194	rs190481474	17	57489695	T	C	0.02449	0.0732983	0.000360835
ILMN_1794213	25864	ABHD14A	3	52009041	52015216	imputed	kgp17623692	rs112026686	3	52435912	A	G	0.03441	0.0884418	0.00242451	0.454564	rs56913998	3	51930261	A	C	0.05306	0.0855508	0.000361957
ILMN_1751708	9445	ITM2B	13	48807273	48836232	imputed	kgp5599877	rs1417203	13	48037223	T	C	0.02429	0.170306	0.00268462	0.471613	rs56332554	13	47814711	T	C	0.01837	-0.232395	0.000365318
ILMN_1658660	70	ACTC1	15	35080296	35087927	genotyped	rs347853	rs347853	15	34597372	T	C	0.33	-0.353085	0.000387778	0.185122	rs347854	15	34597661	C	T	0.3327	-0.348789	0.000500404
ILMN_1677590	5912	RAP2B	3	152880000	152888413	imputed	rs11925597	rs11925597	3	152285415	C	T	0.4372	-0.0209658	0.000609159	0.240209	rs56335235	3	153043850	G	A	0.1102	0.0331955	0.000388241
ILMN_1651513	23517	SKIV2L2	5	54603575	54721409	imputed	rs10940415	rs10940415	5	53985003	T	C	0.1316	0.0491326	0.000850103	0.286555	rs158639	5	55611710	A	G	0.4673	-0.0401843	0.000389823
ILMN_3244096	196441	ZFC3H1	12	72003378	72057749	imputed	kgp4626727	rs12821107	12	71396958	A	G	0.1032	-0.0323955	0.0038542	0.531872	rs28419010	12	71356641	G	A	0.02245	0.0831824	0.000406094
ILMN_2356991	961	CD47	3	107761940	107809935	imputed	kgp2117166	rs9811455	3	106791247	C	T	0.2915	0.0207254	0.000788797	0.275586	rs56081349	3	107558262	C	A	0.03469	-0.0574555	0.000411131
ILMN_1695157	762	CA4	17	58227301	58236906	imputed	rs16944295	rs16944295	17	58443305	G	A	0.336	0.0709432	0.000465974	0.206771	chr17:57658386	17	57658386	T	C	0.1837	-0.0834141	0.000459556
ILMN_1670796	5394	EXOSC10	1	11126675	11159938	genotyped	kgp15648484	rs77738831	1	12069901	G	A	0.04858	-0.121304	0.000462053	0.205703	rs115644004	1	10778332	A	G	0.02857	-0.154271	0.000973832
ILMN_1671893	27243	CHMP2A	19	59062932	59066491	imputed	kgp21518964	rs73937057	19	58380856	G	A	0.01822	-0.152122	0.00316315	0.49905	rs73937070	19	58423736	G	A	0.01633	-0.189814	0.000463716
ILMN_1742187	4121	MAN1A1	6	119498365	119670931	imputed	kgp17424320	rs116163666	6	119067440	G	A	0.05061	0.0454687	0.00144666	0.368402	rs283092	6	118587639	A	C	0.1102	0.037937	0.000467925
ILMN_2109994	53916	RAB4B,MIA-RAB4B	19	41284123	41302849	imputed	rs4803369	rs4803369	19	41315980	A	G	0.06883	0.0365001	0.000926729	0.299016	rs4802090	19	41315234	G	C	0.1469	0.0276922	0.000521675
ILMN_2381397	3329	HSPD1	2	198351307	198364640	imputed	rs6714155	rs6714155	2	197823816	T	C	0.06883	-0.108629	0.000740864	0.266505	rs201745301	2	197817952	C	A	0.06939	-0.110055	0.000576005
ILMN_1682054	6717	SRI	7	87834431	87849399	imputed	kgp3751490	rs73204108	7	87765563	A	G	0.01215	-0.100482	0.000590585	0.236207	rs193163017	7	87742979	G	A	0.01224	-0.100649	0.000584455
ILMN_2384544	8751	ADAM15	1	155023747	155035252	imputed	rs4845673	rs4845673	1	154793296	C	T	0.1224	-0.0609201	0.00068728	0.256235	rs1218569	1	154816938	T	C	0.04898	0.0838791	0.000592505
ILMN_1704164	23400	ATP13A2	1	17312452	17338467	imputed	kgp3748119	rs72922908	1	18275316	T	C	0.1559	0.0221199	0.00205832	0.427115	rs2746471	1	17350238	A	G	0.02857	0.0534071	0.000611802
ILMN_1734814	3308	HSPA4	5	132387661	132440709	imputed	kgp22250229	rs56160229	5	132395803	A	G	0.05466	-0.0533884	0.00121487	0.340897	rs79885531	5	132667137	T	C	0.02857	0.077089	0.000616643
ILMN_2251253	226	ALDOA	16	30075599	30081741	genotyped	exm1232774	rs71389465	16	30380872	G	C	0.02439	0.286461	0.000686767	0.256125	rs144228683	16	29167436	A	G	0.01633	0.336672	0.000958587
ILMN_1711311	5420	PODXL	7	131185020	131241376	genotyped	kgp11357949	rs59753393	7	131997025	T	C	0.07692	-0.0352516	0.000783055	0.274547	rs115463196	7	131691255	T	C	0.03469	-0.0475514	0.00113292
ILMN_1711189	5394	EXOSC10	1	11126675	11159938	imputed	kgp15185375	rs55825417	1	11074108	G	A	0.03036	-0.0917777	0.000831703	0.283399	rs10864462	1	10612158	T	A	0.1143	-0.0490492	0.000794961
ILMN_1686367	3312	HSPA8	11	122928199	122933043	imputed	kgp12930811	rs73605984	11	123280825	C	T	0.01215	0.234912	0.00180379	0.404902	rs10458987	11	122896886	A	G	0.03469	0.145677	0.000802618
ILMN_1755120	10905	MAN1A2	1	117910084	118068320	imputed	kgp15358906	rs146484330	1	117690252	C	T	0.02024	-0.0609254	0.00235857	0.44998	rs145498096	1	117711695	A	C	0.02449	-0.0610929	0.00084404
ILMN_1774287	629	CFB	6	31913720	31919861	imputed	exm-rs1266074	rs1266074	6	31666551	A	G	0.3176	0.0189006	0.00200436	0.422869	rs2077537	6	31606522	C	G	0.3776	0.0201406	0.000850147
ILMN_1769883	3416	IDE	10	94211440	94333852	genotyped	kgp2193599	rs947605	10	95249248	T	G	0.202	0.0445577	0.000877683	0.291176	rs55882825	10	93804730	C	T	0.03673	0.0931469	0.000885949
ILMN_1782939	213	ALB	4	74269971	74287129	genotyped	rs10155140	rs10155140	4	74722534	G	T	0.06301	0.0488017	0.000920071	0.29796	rs114217779	4	73719159	A	C	0.01429	0.0983961	0.00118653
ILMN_1786034	51704	GPRC5B	16	19870292	19896151	genotyped	rs4782296	rs4782296	16	19888106	G	T	0.1336	0.0271087	0.000950059	0.302815	rs113652214	16	19692919	G	A	0.03469	0.0502201	0.00133378
ILMN_1666109	4151	MB	22	36002810	36013384	imputed	kgp3807861	rs73162586	22	35092409	C	G	0.01215	-0.079376	0.00231353	0.44684	rs71314970	22	36638705	T	C	0.07347	0.0367692	0.000963023
ILMN_1720829	7538	ZFP36	19	39897486	39900052	imputed	kgp21525312	rs2232998	19	39110966	G	T	0.04049	0.411518	0.00180619	0.405115	rs61500092	19	39107416	G	A	0.03878	0.446845	0.000965222
ILMN_1699525	6717	SRI	7	87834431	87856308	imputed	rs17149539	rs17149539	7	87038074	G	A	0.2744	-0.0334714	0.00124525	0.34487	rs144824821	7	86948729	A	G	0.01224	0.136957	0.00102844
ILMN_1769083	2940	GSTA3	6	52761438	52774496	imputed	rs2235722	rs2235722	6	53138912	C	T	0.04453	0.0360008	0.00355808	0.518669	rs114541393	6	53561810	G	A	0.08163	-0.0314151	0.0010403
ILMN_1655913	4925	NUCB2	11	17298285	17353070	genotyped	rs10766348	rs10766348	11	16791151	T	C	0.06478	0.0967636	0.00106479	0.32029	rs138026454	11	17872242	C	T	0.01633	0.195781	0.00113598
ILMN_1811221	160728	SLC5A8	12	101549993	101604016	imputed	rs7964241	rs7964241	12	102338235	G	A	0.4143	0.034681	0.00121135	0.340441	rs7964440	12	102338313	C	A	0.1653	-0.0475803	0.00109711
ILMN_1714602	942	CD86	3	121796695	121839988	genotyped	kgp18225733	rs77444503	3	120895293	G	T	0.02632	-0.0616166	0.00114008	0.330903	rs13065245	3	121566729	A	C	0.1592	0.0265248	0.00174638
ILMN_2124769	4904	YBX1	1	43148065	43168020	imputed	kgp9208411	rs72669417	1	43350751	T	C	0.08502	0.067042	0.00346621	0.514112	rs57961593	1	43904949	T	A	0.1633	-0.0575471	0.00115291
ILMN_1671326	26523	EIF2C1	1	36348809	36389899	genotyped	kgp2438507	rs35019018	1	37043022	T	C	0.03036	-0.0572382	0.00118872	0.337399	rs115066259	1	37060529	G	T	0.03673	-0.0494649	0.00238872
ILMN_1744381	5054	SERPINE1	7	100770369	100782547	imputed	kgp1167593	rs111476455	7	101655992	C	A	0.378	0.01648	0.00124676	0.345066	rs17487672	7	101655906	G	A	0.3796	0.0167347	0.00121219
ILMN_1766713	3329	HSPD1	2	198351307	198364640	genotyped	rs11890385	rs11890385	2	198480855	G	A	0.1037	-0.105413	0.00124688	0.345068	rs115076590	2	198390993	A	G	0.02245	-0.208493	0.00136071
ILMN_3273854	3181	HNRNPA2B1	7	26229555	26240413	imputed	kgp13570307	rs77203719	7	26768552	A	G	0.1012	0.0548991	0.00238056	0.451267	rs114268907	7	26721635	C	A	0.1184	0.0533459	0.00127605
ILMN_1752159	79026	AHNAK	11	62201013	62314332	imputed	rs2513749	rs2513749	11	62105391	C	T	0.3028	0.0538572	0.00853873	0.655974	rs3915609	11	61911529	T	C	0.1857	0.0770412	0.00142308
ILMN_1755974	230	ALDOC	17	26900132	26903951	imputed	kgp8562500	rs2177239	17	25923254	A	G	0.3082	0.0414016	0.00304835	0.492634	rs111968812	17	25975518	A	G	0.0102	0.200371	0.00147109
ILMN_3235632	304	ANXA2P2	9	33624222	33625532	genotyped	kgp7067221	rs55683663	9	32830670	T	G	0.2805	0.0302088	0.00147817	0.371902	rs56150923	9	32829616	G	A	0.402	0.026992	0.00219549
ILMN_1712312	8766	RAB11A	15	66161796	66184329	genotyped	kgp19852668	rs60045198	15	66886689	A	G	0.07895	0.0709149	0.0014883	0.373013	rs115815822	15	65679634	G	A	0.0449	-0.0916245	0.00193808
ILMN_1789074	3303	HSPA1A	6	31783290	31785719	imputed	kgp11918860	rs73728584	6	31428501	A	C	0.1707	-0.115462	0.0051679	0.579498	rs28361034	6	31974723	A	G	0.0898	0.178665	0.00151336
ILMN_1736700	226	ALDOA	16	30076993	30081741	imputed	kgp16545598	rs116838618	16	30065824	A	G	0.03441	-0.137546	0.00205349	0.426727	rs147191397	16	31047395	T	C	0.01224	0.23238	0.00154667
ILMN_1706304	192670	EIF2C4	1	36273827	36323490	imputed	kgp475226	rs78352183	1	36661705	C	T	0.01012	-0.0929022	0.00187542	0.411395	rs77671667	1	35380570	A	C	0.02653	0.0596168	0.00160178
ILMN_2413084	3312	HSPA8	11	122928199	122933043	genotyped	rs7109445	rs7109445	11	122965487	A	C	0.2794	-0.0605307	0.00161183	0.386281	rs147843306	11	123575574	T	C	0.01224	0.23364	0.00240045
ILMN_2075507	10905	MAN1A2	1	117910084	118068320	genotyped	kgp15602011	rs116235966	1	118988579	C	T	0.01822	0.063419	0.00170328	0.395255	rs114667304	1	117710067	G	T	0.0102	0.0840473	0.00181647
ILMN_1751500	8751	ADAM15	1	155023747	155035252	imputed	rs8177962	rs8177962	1	155269991	T	C	0.01619	0.0590525	0.00389274	0.533503	rs34455078	1	155087411	A	G	0.03265	0.0459022	0.00189457
ILMN_1656621	27243	CHMP2A	19	59062932	59066491	imputed	kgp21511179	rs58334499	19	58825715	A	G	0.05081	0.0480338	0.0085898	0.656707	rs12971534	19	58541508	G	A	0.1041	-0.0390735	0.00195416
ILMN_1792495	79026	AHNAK	11	62283373	62314332	imputed	kgp12890267	rs57501698	11	62160527	G	C	0.2206	0.0490443	0.00785687	0.643561	rs12807659	11	62202427	C	G	0.01224	-0.191002	0.00308669
