# Supplementary material for: Genetic regulation of exosome biogenesis pathway in human adipose and muscle tissue and association with obesity and insulin resistance
Source: Research Square preprint supplement (doi:10.21203/rs.3.rs-6580546/v1), 2025-07-11
Supplement: Supplementary file 9 [file ca866af88ef7696953d0b89b.xlsx]

## Sheet: S.Table-5
Supplementary table-5: Transcript levels of exosome pathway genes in skeletal muscle are associated with BMI in FUSION cohort (European Ancestry).
Transcripts from RNA-sequencing analysis for genes expressed in skeletal muscle tissue from participants in FUSION cohort and significant with q-value<0.05 in linear regression analysis (base model) are shown.
Summary statistics of previously completed analyses was obtained for this study from publicly available data source (https://www.ebi.ac.uk/birney-srv/FUSION/)
human_entrez_gene	human_ensembl_gene	symbol	beta	se	P-value	q-value	refseq_accession	gene	name
3306	ENSG00000126803	HSPA2	0.354899	0.0554761	7.0871e-10	3.9076e-07	NM_001387931	ENSG00000126803.8	heat shock protein family A (Hsp70) member 2
58	ENSG00000143632	ACTA1	-0.195169	0.0360057	1.33309e-07	2.02397e-05	NM_001100	ENSG00000143632.10	actin alpha 1, skeletal muscle
4925	ENSG00000070081	NUCB2	0.235907	0.0462489	6.43661e-07	7.25053e-05	NM_005013	ENSG00000070081.11	nucleobindin 2
7917	ENSG00000204463	BAG6	-0.140474	0.0297483	3.78123e-06	0.000262332	NM_080703	ENSG00000204463.8	BAG cochaperone 6
10987	ENSG00000121022	COPS5	0.143428	0.0304271	3.92552e-06	0.000269664	NM_006837	ENSG00000121022.9	COP9 signalosome subunit 5
6553	ENSG00000135740	SLC9A5	-0.259075	0.0564726	6.91235e-06	0.000401184	NM_001323971	ENSG00000135740.12	solute carrier family 9 member A5
6386	ENSG00000137575	SDCBP	0.168361	0.0368452	7.49273e-06	0.00041752	NM_005625	ENSG00000137575.7	syndecan binding protein
3674	ENSG00000005961	ITGA2B	0.249076	0.0573066	1.97196e-05	0.000860759	NM_000419	ENSG00000005961.13	integrin subunit alpha 2b
7879	ENSG00000075785	RAB7A	0.133359	0.0308579	2.18944e-05	0.000930488	NM_004637	ENSG00000075785.8	RAB7A, member RAS oncogene family
6385	ENSG00000124145	SDC4	0.202347	0.0482395	3.72677e-05	0.00136748	NM_002999	ENSG00000124145.5	syndecan 4
26523	ENSG00000092847	AGO1	-0.187627	0.0451356	4.35292e-05	0.00151499	NM_001317122	ENSG00000092847.6	argonaute RISC component 1
29126	ENSG00000120217	CD274	0.199257	0.054846	0.000336069	0.00666792	NM_014143	ENSG00000120217.9	CD274 molecule
356	ENSG00000117560	FASLG	0.21139	0.0590135	0.000405238	0.00754715	NM_000639	ENSG00000117560.6	Fas ligand
7086	ENSG00000163931	TKT	0.195815	0.0553886	0.000480296	0.00847781	NM_001064	ENSG00000163931.11	transketolase
302	ENSG00000182718	ANXA2	0.207671	0.061415	0.000829406	0.0121949	NM_001002857	ENSG00000182718.12	annexin A2
112574	ENSG00000178996	SNX18	0.146078	0.0432279	0.000835748	0.0122366	NM_001102575	ENSG00000178996.8	sorting nexin 18
54888	ENSG00000037474	NSUN2	-0.134841	0.0401921	0.000909545	0.0130258	NM_017755	ENSG00000037474.10	NOP2/Sun RNA methyltransferase 2
928	ENSG00000010278	CD9	0.166555	0.0518589	0.00148184	0.0183063	NM_001330312	ENSG00000010278.7	CD9 molecule
5394	ENSG00000171824	EXOSC10	-0.16424	0.0522348	0.00185376	0.0214585	NM_001001998	ENSG00000171824.9	exosome component 10
6517	ENSG00000181856	SLC2A4	-0.186642	0.0598555	0.00201936	0.0226497	NM_001042	ENSG00000181856.10	solute carrier family 2 member 4
192670	ENSG00000134698	AGO4	-0.116927	0.0377128	0.00213992	0.0235111	NM_017629	ENSG00000134698.10	argonaute RISC component 4
301	ENSG00000135046	ANXA1	0.138824	0.0461914	0.00290562	0.0286757	NM_000700	ENSG00000135046.9	annexin A1
10808	ENSG00000120694	HSPH1	0.137188	0.0461197	0.00320303	0.0307279	NM_001286503	ENSG00000120694.15	heat shock protein family H (Hsp110) member 1
159963	ENSG00000148942	SLC5A12	0.18417	0.0623282	0.00340858	0.0319823	NM_178498	ENSG00000148942.10	solute carrier family 5 member 12
115752	ENSG00000166938	DIS3L	-0.123693	0.0424794	0.00389772	0.0347068	NM_133375	ENSG00000166938.8	DIS3 like exosome 3'-5' exoribonuclease
55512	ENSG00000103056	SMPD3	0.172487	0.0601314	0.00445485	0.0380041	NM_018667	ENSG00000103056.7	sphingomyelin phosphodiesterase 3
6832	ENSG00000156502	SUPV3L1	-0.122931	0.0432151	0.00479195	0.0399685	NM_003171	ENSG00000156502.9	Suv3 like RNA helicase
1192	ENSG00000213719	CLIC1	0.161035	0.0584432	0.00626673	0.0479024	NM_001288	ENSG00000213719.4	chloride intracellular channel 1
4151	ENSG00000198125	MB	0.152648	0.0564672	0.0073076	0.0530523	NM_203377	ENSG00000198125.8	myoglobin
304	ENSG00000231991	ANXA2P2	0.149482	0.055621	0.00765265	0.0547978	NR_003573	ENSG00000231991.3	annexin A2 pseudogene 2
27183	ENSG00000132612	VPS4A	-0.118797	0.04469	0.00833065	0.0581231	NM_013245	ENSG00000132612.14	vacuolar protein sorting 4 homolog A
6558	ENSG00000064651	SLC12A2	-0.101232	0.0381421	0.00843191	0.0587318	NM_001046	ENSG00000064651.9	solute carrier family 12 member 2
8029	ENSG00000107611	CUBN	0.144303	0.0544737	0.00855476	0.0592331	NM_001081	ENSG00000107611.10	cubilin
27243	ENSG00000130724	CHMP2A	-0.134795	0.0511708	0.00892764	0.0608101	NM_014453	ENSG00000130724.4	charged multivesicular body protein 2A
3310	ENSG00000173110	HSPA6	0.152825	0.0592213	0.0103999	0.0670666	NM_002155	ENSG00000173110.6	heat shock protein family A (Hsp70) member 6
5819	ENSG00000130202	NECTIN2	0.107409	0.0430568	0.0132177	0.078787	NM_002856	ENSG00000130202.5	nectin cell adhesion molecule 2
5549	ENSG00000188783	PRELP	0.134791	0.055897	0.0165687	0.0907336	NM_002725	ENSG00000188783.5	proline and arginine rich end leucine rich repeat protein
5912	ENSG00000181467	RAP2B	0.126955	0.0526946	0.0166643	0.0910192	NM_002886	ENSG00000181467.2	RAP2B, member of RAS oncogene family
23405	ENSG00000100697	DICER1	-0.0644982	0.0269981	0.0175922	0.0943413	NM_030621	ENSG00000100697.10	dicer 1, ribonuclease III
3181	ENSG00000122566	HNRNPA2B1	0.0658099	0.028292	0.0207652	0.104711	NM_002137	ENSG00000122566.16	heterogeneous nuclear ribonucleoprotein A2/B1
1213	ENSG00000141367	CLTC	0.0700759	0.0309533	0.0243844	0.116352	NM_004859	ENSG00000141367.7	clathrin heavy chain
11267	ENSG00000159210	SNF8	-0.0870532	0.0386569	0.0251415	0.118454	NM_007241	ENSG00000159210.5	SNF8 subunit of ESCRT-II
25864	ENSG00000248487	ABHD14A	-0.0734855	0.0335125	0.0291895	0.129599	NM_015407	ENSG00000248487.4	abhydrolase domain containing 14A
56915	ENSG00000077348	EXOSC5	-0.0878883	0.0402491	0.0298647	0.131455	NM_020158	ENSG00000077348.4	exosome component 5
79026	ENSG00000124942	AHNAK	-0.0900538	0.0413422	0.0302656	0.132523	NM_024060	ENSG00000124942.9	AHNAK nucleoprotein
60	ENSG00000075624	ACTB	0.115316	0.0536076	0.0323676	0.138514	NM_001101	ENSG00000075624.9	actin beta
22824	ENSG00000164070	HSPA4L	-0.101238	0.0470796	0.0324285	0.138605	NM_014278	ENSG00000164070.7	heat shock protein family A (Hsp70) member 4 like
5393	ENSG00000123737	EXOSC9	-0.0711741	0.0332598	0.0332695	0.140849	NM_005033	ENSG00000123737.8	exosome component 9
975	ENSG00000110651	CD81	0.100916	0.0473033	0.0338084	0.142211	NM_004356	ENSG00000110651.7	CD81 molecule
3309	ENSG00000044574	HSPA5	0.107626	0.0505257	0.0340792	0.142863	NM_005347	ENSG00000044574.7	heat shock protein family A (Hsp70) member 5
5768	ENSG00000116260	QSOX1	0.11118	0.0525005	0.035129	0.145459	NM_002826	ENSG00000116260.12	quiescin sulfhydryl oxidase 1
3507	ENSG00000211899	IGHM	0.128433	0.0608029	0.0355944	0.146604	NG_001019	ENSG00000211899.3	immunoglobulin heavy constant mu
290	ENSG00000166825	ANPEP	0.123653	0.0589403	0.0368544	0.15017	NM_001150	ENSG00000166825.9	alanyl aminopeptidase, membrane
10079	ENSG00000054793	ATP9A	-0.110505	0.0539497	0.0415126	0.160801	NM_006045	ENSG00000054793.9	ATPase phospholipid transporting 9A (putative)
933	ENSG00000012124	CD22	0.125394	0.0617019	0.043121	0.164627	NM_001771	ENSG00000012124.10	CD22 molecule
358	ENSG00000240583	AQP1	-0.110816	0.0555757	0.0471765	0.174421	NM_198098	ENSG00000240583.6	aquaporin 1 (Colton blood group)
8766	ENSG00000103769	RAB11A	0.0608723	0.0307981	0.0491312	0.178777	NM_001206836	ENSG00000103769.5	RAB11A, member RAS oncogene family
3680	ENSG00000144668	ITGA9	0.103335	0.0541556	0.057454	0.197082	NM_002207	ENSG00000144668.7	integrin subunit alpha 9
5867	ENSG00000168118	RAB4A	-0.0641423	0.0336663	0.0578276	0.197974	NM_004578	ENSG00000168118.7	RAB4A, member RAS oncogene family
635	ENSG00000145692	BHMT	0.116496	0.0637916	0.0689408	0.221134	NM_001713	ENSG00000145692.10	betaine--homocysteine S-methyltransferase
3676	ENSG00000115232	ITGA4	0.0911857	0.0503321	0.0711634	0.225297	NM_000885	ENSG00000115232.9	integrin subunit alpha 4
51013	ENSG00000171311	EXOSC1	0.0744918	0.0411981	0.0717148	0.226461	NM_001318362	ENSG00000171311.8	exosome component 1
23589	ENSG00000153048	CARHSP1	0.102146	0.0564909	0.0717079	0.226473	NM_014316	ENSG00000153048.6	calcium regulated heat stable protein 1
762	ENSG00000167434	CA4	-0.10673	0.0595137	0.0740505	0.231085	NM_000717	ENSG00000167434.5	carbonic anhydrase 4
688	ENSG00000102554	KLF5	0.0994659	0.0562128	0.077964	0.238154	NM_001286818	ENSG00000102554.9	KLF transcription factor 5
51704	ENSG00000167191	GPRC5B	-0.103968	0.060438	0.086551	0.254051	NM_001304771	ENSG00000167191.7	G protein-coupled receptor class C group 5 member B
27068	ENSG00000138777	PPA2	-0.0587622	0.0343269	0.0880912	0.256845	NM_176869	ENSG00000138777.15	inorganic pyrophosphatase 2
9525	ENSG00000119541	VPS4B	0.059953	0.0352018	0.0897129	0.259945	NM_004869	ENSG00000119541.5	vacuolar protein sorting 4 homolog B
114990	ENSG00000168140	VASN	0.075214	0.0442173	0.0901102	0.260628	NM_138440	ENSG00000168140.4	vasorin
10058	ENSG00000115657	ABCB6	0.0880644	0.0521597	0.0925139	0.264947	NM_005689	ENSG00000115657.8	ATP binding cassette subfamily B member 6 (Langereis blood group)
494115	ENSG00000213516	RBMXL1	-0.0710076	0.0423092	0.0944626	0.268109	NM_019610	ENSG00000213516.5	RBMX like 1
5911	ENSG00000125249	RAP2A	0.0604044	0.0363775	0.0979949	0.273576	NM_021033	ENSG00000125249.6	RAP2A, member of RAS oncogene family
23743	ENSG00000132840	BHMT2	0.0987414	0.05993	0.100613	0.278033	NM_017614	ENSG00000132840.5	betaine--homocysteine S-methyltransferase 2
3501	ENSG00000211893	IGHG2	0.101956	0.0626534	0.104856	0.285687	NG_001019	ENSG00000211893.3	immunoglobulin heavy constant gamma 2 (G2m marker)
3308	ENSG00000170606	HSPA4	0.0680096	0.0443211	0.126101	0.319014	"NM_002154|NM_198431"	ENSG00000170606.9	heat shock protein family A (Hsp70) member 4
7037	ENSG00000072274	TFRC	-0.0780034	0.0511637	0.12855	0.322948	NM_001128148	ENSG00000072274.8	transferrin receptor
942	ENSG00000114013	CD86	0.0903134	0.0595681	0.130672	0.326323	NM_006889	ENSG00000114013.11	CD86 molecule
10905	ENSG00000198162	MAN1A2	0.0421057	0.027781	0.130801	0.326449	NM_006699	ENSG00000198162.8	mannosidase alpha class 1A member 2
23517	ENSG00000039123	MTREX	0.0422355	0.0278831	0.131027	0.326819	NM_015360	ENSG00000039123.11	Mtr4 exosome RNA helicase
22894	ENSG00000083520	DIS3	-0.0513592	0.0352232	0.145991	0.350217	NM_014953	ENSG00000083520.10	DIS3 homolog, exosome endoribonuclease and 3'-5' exoribonuclease
5420	ENSG00000128567	PODXL	-0.0862288	0.0595941	0.149092	0.354492	NM_001018111	ENSG00000128567.12	podocalyxin like
9798	ENSG00000182149	IST1	-0.05166	0.0357143	0.14922	0.354675	NM_014761	ENSG00000182149.16	IST1 factor associated with ESCRT-III
3329	ENSG00000144381	HSPD1	0.0462048	0.0320485	0.150559	0.356522	NM_002156	ENSG00000144381.12	heat shock protein family D (Hsp60) member 1
10015	ENSG00000170248	PDCD6IP	0.0613831	0.0427517	0.152233	0.358663	NM_001162429	ENSG00000170248.9	programmed cell death 6 interacting protein
70	ENSG00000159251	ACTC1	-0.0890197	0.06276	0.15724	0.366178	NM_005159	ENSG00000159251.6	actin alpha cardiac muscle 1
4669	ENSG00000108784	NAGLU	-0.0679568	0.0482837	0.160462	0.371368	NM_000263	ENSG00000108784.5	N-acetyl-alpha-glucosaminidase
53916	ENSG00000167578	RAB4B	0.0719852	0.0514182	0.16268	0.374228	NM_016154	ENSG00000167578.12	RAB4B, member RAS oncogene family
26027	ENSG00000162390	ACOT11	-0.0824654	0.0596457	0.167951	0.381247	NM_015547	ENSG00000162390.13	acyl-CoA thioesterase 11
3304	ENSG00000204388	HSPA1B	0.0715547	0.0533128	0.180686	0.398038	NM_005346	ENSG00000204388.5	heat shock protein family A (Hsp70) member 1B
71	ENSG00000184009	ACTG1	0.0700022	0.0521766	0.180858	0.39829	NM_001614	ENSG00000184009.5	actin gamma 1
5314	ENSG00000170927	PKHD1	0.0791171	0.0592694	0.18306	0.401326	NM_138694	ENSG00000170927.10	PKHD1 ciliary IPT domain containing fibrocystin/polyductin
11332	ENSG00000097021	ACOT7	0.0705269	0.0528759	0.183404	0.401575	NM_007274	ENSG00000097021.15	acyl-CoA thioesterase 7
8842	ENSG00000007062	PROM1	-0.0728898	0.0549119	0.185517	0.404132	NM_006017	ENSG00000007062.7	prominin 1
4121	ENSG00000111885	MAN1A1	0.0584374	0.0440421	0.185695	0.404268	NM_005907	ENSG00000111885.5	mannosidase alpha class 1A member 1
93035	ENSG00000205038	PKHD1L1	-0.0812851	0.0619133	0.190353	0.410317	NM_177531	ENSG00000205038.7	PKHD1 like 1
23016	ENSG00000075914	EXOSC7	0.0562118	0.043972	0.202239	0.426074	NM_015004	ENSG00000075914.8	exosome component 7
3503	ENSG00000211892	IGHG4	0.0785025	0.0616912	0.204304	0.42853	NG_001019	ENSG00000211892.2	immunoglobulin heavy constant gamma 4 (G4m marker)
118491	ENSG00000156042	CFAP70	0.0496682	0.0397598	0.212688	0.438909	NM_145170	ENSG00000156042.13	cilia and flagella associated protein 70
440081	ENSG00000214826	DDX12P	-0.0741298	0.0614406	0.228686	0.457415	XM_495908	ENSG00000214826.4	DEAD/H-box helicase 12, pseudogene
7538	ENSG00000128016	ZFP36	-0.0612863	0.0512319	0.232663	0.462105	NM_003407	ENSG00000128016.4	ZFP36 ring finger protein
3502	ENSG00000211897	IGHG3	0.0721235	0.0608726	0.237143	0.467372	NG_001019	ENSG00000211897.3	immunoglobulin heavy constant gamma 3 (G3m marker)
5873	ENSG00000069974	RAB27A	0.0556483	0.0473432	0.240876	0.470612	"NM_004580|NM_183236"	ENSG00000069974.11	RAB27A, member RAS oncogene family
3500	ENSG00000211896	IGHG1	0.0716614	0.0610811	0.241758	0.471455	NG_001019	ENSG00000211896.2	immunoglobulin heavy constant gamma 1 (G1m marker)
4924	ENSG00000104805	NUCB1	-0.0420884	0.0359161	0.242304	0.471818	NM_006184	ENSG00000104805.11	nucleobindin 1
6717	ENSG00000075142	SRI	0.0382176	0.0326343	0.242613	0.472068	NM_003130	ENSG00000075142.9	sorcin
6338	ENSG00000168447	SCNN1B	-0.0726102	0.0635292	0.25409	0.484458	NM_000336	ENSG00000168447.6	sodium channel epithelial 1 subunit beta
961	ENSG00000196776	CD47	-0.0355709	0.0313447	0.257468	0.488143	NM_001777	ENSG00000196776.10	CD47 molecule
1636	ENSG00000159640	ACE	-0.0554564	0.0497839	0.266309	0.496504	NM_000789	ENSG00000159640.10	angiotensin I converting enzyme
7251	ENSG00000074319	TSG101	0.058747	0.0539578	0.277246	0.507679	NM_006292	ENSG00000074319.8	tumor susceptibility 101
374868	ENSG00000166377	ATP9B	-0.0512105	0.0474066	0.281014	0.511627	NM_198531	ENSG00000166377.15	ATPase phospholipid transporting 9B (putative)
3383	ENSG00000090339	ICAM1	-0.0585756	0.0542192	0.280966	0.511674	NM_000201	ENSG00000090339.4	intercellular adhesion molecule 1
5311	ENSG00000118762	PKD2	0.0444324	0.0422371	0.293766	0.524767	NM_000297	ENSG00000118762.3	polycystin 2, transient receptor potential cation channel
9052	ENSG00000013588	GPRC5A	0.061133	0.0603027	0.311614	0.54358	NM_003979	ENSG00000013588.5	G protein-coupled receptor class C group 5 member A
51010	ENSG00000107371	EXOSC3	0.0346714	0.0343954	0.314358	0.545822	NM_016042	ENSG00000107371.8	exosome component 3
9445	ENSG00000136156	ITM2B	0.0403327	0.0402285	0.31697	0.54872	NM_021999	ENSG00000136156.8	integral membrane protein 2B
2335	ENSG00000115414	FN1	0.0631852	0.0631815	0.318191	0.549925	NM_212476	ENSG00000115414.14	fibronectin 1
57535	ENSG00000116299	ELAPOR1	0.0617658	0.0617569	0.31815	0.550126	NM_020775	ENSG00000116299.12	endosome-lysosome associated apoptosis and autophagy regulator 1
5071	ENSG00000185345	PRKN	-0.0540917	0.0556923	0.332301	0.563163	NM_004562	ENSG00000185345.14	parkin RBR E3 ubiquitin protein ligase
5464	ENSG00000180817	PPA1	0.0376383	0.0390288	0.335735	0.567193	NM_021129	ENSG00000180817.7	inorganic pyrophosphatase 1
5874	ENSG00000041353	RAB27B	0.0484494	0.0522971	0.355064	0.585587	NM_004163	ENSG00000041353.5	RAB27B, member RAS oncogene family
54663	ENSG00000133316	WDR74	-0.0482695	0.0534758	0.367533	0.597266	NM_018093	ENSG00000133316.11	WD repeat domain 74
8027	ENSG00000136738	STAM	0.0456775	0.0516496	0.377294	0.606542	NM_003473	ENSG00000136738.10	signal transducing adaptor molecule
226	ENSG00000149925	ALDOA	0.0444598	0.0510213	0.384324	0.613466	NM_000034	ENSG00000149925.12	aldolase, fructose-bisphosphate A
717	ENSG00000166278	C2	0.0506224	0.0588237	0.390245	0.619097	NM_000063	ENSG00000166278.10	complement C2
9230	ENSG00000185236	RAB11B	0.0266504	0.0314858	0.398076	0.62588	NM_004218	ENSG00000185236.7	RAB11B, member RAS oncogene family
3678	ENSG00000161638	ITGA5	-0.0459203	0.056185	0.414485	0.639822	NM_002205	ENSG00000161638.6	integrin subunit alpha 5
5869	ENSG00000111540	RAB5B	0.0419736	0.0532951	0.43165	0.654599	NM_001252036	ENSG00000111540.11	RAB5B, member RAS oncogene family
9146	ENSG00000185359	HGS	-0.0291254	0.0371238	0.433418	0.656234	NM_004712	ENSG00000185359.8	hepatocyte growth factor-regulated tyrosine kinase substrate
55890	ENSG00000170412	GPRC5C	-0.0344397	0.0439816	0.434296	0.656899	NM_001366261	ENSG00000170412.12	G protein-coupled receptor class C group 5 member C
629	ENSG00000243649	CFB	-0.0461406	0.060819	0.448731	0.669692	NM_001710	ENSG00000243649.4	complement factor B
3385	ENSG00000076662	ICAM3	0.0430565	0.0574213	0.454017	0.674028	NM_001320605	ENSG00000076662.5	intercellular adhesion molecule 3
192669	ENSG00000126070	AGO3	-0.0215004	0.028732	0.454935	0.674721	NM_024852	ENSG00000126070.14	argonaute RISC catalytic component 3
4644	ENSG00000197535	MYO5A	-0.0273571	0.0379279	0.471364	0.687505	NM_000259	ENSG00000197535.10	myosin VA
3416	ENSG00000119912	IDE	-0.0253398	0.0352296	0.472602	0.688353	NM_004969	ENSG00000119912.11	insulin degrading enzyme
4653	ENSG00000034971	MYOC	0.0449681	0.0630105	0.476063	0.690848	NM_000261	ENSG00000034971.10	myocilin
733	ENSG00000176919	C8G	-0.0385087	0.0540975	0.477188	0.691571	NM_000606	ENSG00000176919.7	complement C8 gamma chain
87178	ENSG00000138035	PNPT1	-0.0196932	0.0279062	0.480996	0.694448	NM_033109	ENSG00000138035.10	polyribonucleotide nucleotidyltransferase 1
6337	ENSG00000111319	SCNN1A	0.0428369	0.0607542	0.481374	0.694659	NM_001038	ENSG00000111319.8	sodium channel epithelial 1 subunit alpha
6490	ENSG00000185664	PMEL	-0.039779	0.0587203	0.498721	0.709045	NM_006928	ENSG00000185664.10	premelanosome protein
23404	ENSG00000130713	EXOSC2	0.0233982	0.0359202	0.515355	0.720665	NM_014285	ENSG00000130713.11	exosome component 2
4904	ENSG00000065978	YBX1	-0.0213326	0.032804	0.516057	0.721021	NM_004559	ENSG00000065978.13	Y-box binding protein 1
5310	ENSG00000008710	PKD1	0.0171126	0.0283156	0.546125	0.743641	NM_000296	ENSG00000008710.13	polycystin 1, transient receptor potential channel interacting
1950	ENSG00000138798	EGF	-0.0285872	0.0480519	0.552401	0.74849	NM_001178130	ENSG00000138798.7	epidermal growth factor
196441	ENSG00000133858	ZFC3H1	-0.0168967	0.0290014	0.560645	0.754149	NM_144982	ENSG00000133858.11	zinc finger C3H1-type containing
79572	ENSG00000133657	ATP13A3	0.0161398	0.0277321	0.561068	0.754476	NM_024524	ENSG00000133657.10	ATPase 13A3
3312	ENSG00000109971	HSPA8	-0.0321622	0.0560758	0.566757	0.759252	NM_006597	ENSG00000109971.9	heat shock protein family A (Hsp70) member 8
72	ENSG00000163017	ACTG2	-0.0351793	0.0616347	0.568636	0.760893	NM_001615	ENSG00000163017.9	actin gamma 2, smooth muscle
970	ENSG00000125726	CD70	0.0351274	0.0627497	0.576085	0.766115	NM_001252	ENSG00000125726.6	CD70 molecule
348	ENSG00000130203	APOE	0.0267545	0.0479715	0.577506	0.766642	NM_000041	ENSG00000130203.5	apolipoprotein E
4645	ENSG00000167306	MYO5B	-0.0338747	0.0611093	0.579819	0.768446	NM_001080467	ENSG00000167306.14	myosin VB
5817	ENSG00000073008	PVR	0.0313579	0.0568605	0.581762	0.769755	NM_006505	ENSG00000073008.10	PVR cell adhesion molecule
113146	ENSG00000185567	AHNAK2	-0.032868	0.0608031	0.58926	0.775123	NM_138420	ENSG00000185567.6	AHNAK nucleoprotein 2
57134	ENSG00000117643	MAN1C1	-0.0316791	0.0591207	0.592518	0.77702	NM_020379	ENSG00000117643.10	mannosidase alpha class 1C member 1
27161	ENSG00000123908	AGO2	-0.0287971	0.0551379	0.601914	0.78331	NM_012154	ENSG00000123908.7	argonaute RISC catalytic component 2
56624	ENSG00000188611	ASAH2	-0.0305015	0.0586389	0.603386	0.783912	NM_019893	ENSG00000188611.10	N-acylsphingosine amidohydrolase 2
3305	ENSG00000204390	HSPA1L	0.0292461	0.057678	0.612535	0.78992	NM_005527	ENSG00000204390.8	heat shock protein family A (Hsp70) member 1 like
4582	ENSG00000185499	MUC1	0.0305353	0.0609716	0.616918	0.792694	NM_002456	ENSG00000185499.12	mucin 1, cell surface associated
222223	ENSG00000164659	ELAPOR2	0.0250461	0.0512322	0.625334	0.798513	NM_152748	ENSG00000164659.10	endosome-lysosome associated apoptosis and autophagy regulator family member 2
5104	ENSG00000188488	SERPINA5	0.0279211	0.0573133	0.626542	0.799032	NM_000624	ENSG00000188488.9	serpin family A member 5
27254	ENSG00000172346	CSDC2	-0.0283226	0.0581907	0.626858	0.799338	NM_014460	ENSG00000172346.10	cold shock domain containing C2
3303	ENSG00000204389	HSPA1A	-0.0232243	0.0477286	0.626948	0.799356	NM_005345	ENSG00000204389.8	heat shock protein family A (Hsp70) member 1A
59	ENSG00000107796	ACTA2	0.0279987	0.0600105	0.641194	0.809051	NM_001613	ENSG00000107796.8	actin alpha 2, smooth muscle
54512	ENSG00000178896	EXOSC4	0.0198225	0.042953	0.644822	0.810748	NM_019037	ENSG00000178896.6	exosome component 4
10200	ENSG00000135698	MPHOSPH6	0.0163622	0.035655	0.646678	0.811621	NM_005792	ENSG00000135698.5	M-phase phosphoprotein 6
4931	ENSG00000143748	NVL	-0.0177577	0.0403011	0.659842	0.820572	NM_002533	ENSG00000143748.13	nuclear VCP like
84418	ENSG00000120306	CYSTM1	0.0248361	0.0564325	0.660219	0.820945	NM_032412	ENSG00000120306.5	cysteine rich transmembrane module containing 1
1663	ENSG00000013573	DDX11	0.0266433	0.0620456	0.667969	0.826265	NM_030653	ENSG00000013573.12	DEAD/H-box helicase 11
118460	ENSG00000223496	EXOSC6	-0.0246378	0.0586995	0.675023	0.830871	NM_058219	ENSG00000223496.1	exosome component 6
5054	ENSG00000106366	SERPINE1	0.0244658	0.0588672	0.67803	0.832811	NM_000602	ENSG00000106366.7	serpin family E member 1
213	ENSG00000163631	ALB	0.0242718	0.0592697	0.682491	0.835352	NM_000477	ENSG00000163631.12	albumin
100526760	ENSG00000114786	ABHD14A-ACY1	0.0239189	0.0615894	0.698059	0.845614	NM_001316331	ENSG00000114786.11	ABHD14A-ACY1 readthrough
6382	ENSG00000115884	SDC1	0.0231726	0.0617019	0.707546	0.851542	NM_001006946	ENSG00000115884.6	syndecan 1
230	ENSG00000109107	ALDOC	0.0222493	0.0599069	0.710636	0.85335	NM_005165	ENSG00000109107.9	aldolase, fructose-bisphosphate C
95	ENSG00000243989	ACY1	0.0195718	0.0580971	0.736472	0.869083	NM_000666	ENSG00000243989.3	aminoacylase 1
8516	ENSG00000077943	ITGA8	-0.0190882	0.0595391	0.748765	0.876334	NM_003638	ENSG00000077943.7	integrin subunit alpha 8
947	ENSG00000174059	CD34	-0.0167983	0.0566581	0.767091	0.886638	NM_001773	ENSG00000174059.12	CD34 molecule
8218	ENSG00000070371	CLTCL1	-0.0160308	0.0547155	0.769763	0.888305	NM_007098	ENSG00000070371.11	clathrin heavy chain like 1
23400	ENSG00000159363	ATP13A2	0.00863846	0.0318254	0.786269	0.897222	NM_022089	ENSG00000159363.13	ATPase cation transporting 13A2
6652	ENSG00000140263	SORD	0.0139069	0.0612529	0.820566	0.916591	NM_003104	ENSG00000140263.9	sorbitol dehydrogenase
81618	ENSG00000135916	ITM2C	0.011978	0.0526821	0.820316	0.916605	NM_030926	ENSG00000135916.11	integral membrane protein 2C
5172	ENSG00000091137	SLC26A4	-0.0096817	0.0433452	0.823425	0.917632	NM_000441	ENSG00000091137.7	solute carrier family 26 member 4
84239	ENSG00000127249	ATP13A4	0.0126838	0.0582567	0.827812	0.920415	NM_032279	ENSG00000127249.10	ATPase 13A4
55240	ENSG00000115107	STEAP3	0.0110808	0.0534831	0.836025	0.926058	NM_018234	ENSG00000115107.15	STEAP3 metalloreductase
440915	ENSG00000204434	POTEKP	-0.010484	0.0547002	0.848152	0.933323	NR_033885	ENSG00000204434.4	POTE ankyrin domain family member K, pseudogene
57471	ENSG00000136541	ERMN	0.0105846	0.0591246	0.858056	0.938064	NM_001009959	ENSG00000136541.10	ermin
11340	ENSG00000120699	EXOSC8	-0.00492151	0.0316676	0.876615	0.946744	NM_181503	ENSG00000120699.8	exosome component 8
26022	ENSG00000006042	TMEM98	0.00798574	0.0615398	0.89685	0.955789	NM_015544	ENSG00000006042.7	transmembrane protein 98
9373	ENSG00000137055	PLAA	0.00410497	0.03409	0.904245	0.958114	NM_001031689	ENSG00000137055.10	phospholipase A2 activating protein
653308	ENSG00000204147	ASAH2B	0.00575718	0.0526808	0.913059	0.961956	NM_001079516	ENSG00000204147.5	N-acylsphingosine amidohydrolase 2B
10438	ENSG00000197223	C1D	-0.00268897	0.0278341	0.923111	0.966085	NM_006333	ENSG00000197223.7	C1D nuclear receptor corepressor
7288	ENSG00000104804	TULP2	0.0050439	0.0629661	0.936214	0.972608	NM_003323	ENSG00000104804.3	TUB like protein 2
728378	ENSG00000196604	POTEF	0.00219963	0.0286531	0.938866	0.973818	NM_001099771	ENSG00000196604.7	POTE ankyrin domain family member F
9567	ENSG00000100226	GTPBP1	0.00247526	0.0404155	0.95121	0.978339	NM_004286	ENSG00000100226.11	GTP binding protein 1
3685	ENSG00000138448	ITGAV	0.00115853	0.0306493	0.969876	0.986976	NM_002210	ENSG00000138448.7	integrin subunit alpha V
967	ENSG00000135404	CD63	0.0014754	0.0433914	0.972901	0.988134	NM_001257389	ENSG00000135404.7	CD63 molecule
8751	ENSG00000143537	ADAM15	-0.000612634	0.0452352	0.989204	0.995094	NM_003815	ENSG00000143537.9	ADAM metallopeptidase domain 15
