# Supplementary material for: Genetic regulation of exosome biogenesis pathway in human adipose and muscle tissue and association with obesity and insulin resistance
Source: Research Square preprint supplement (doi:10.21203/rs.3.rs-6580546/v1), 2025-07-11
Supplement: Supplementary file 10 [file db919c6c064414dd0bf96cc4.xlsx]

## Sheet: S.Table-6
Supplementary Table 6: cis-eQTLs for exosome pathway genes in adipose tissue of African Americans (AAGMEX cohort).
Sorted list of probes representing transcripts of exosome pathway genes (sorted based on smallest cis-eQTL analysis p-values based on either directly genetyped or imputed SNPs)
MAF, Minor Allele Frequency; beta, effect size of minor allele; eQTL p value, significance in additive model (in MatrixEQTL analysis), FDR, FDP corrected P- value for directly genotyped SNPs
Most significant directly genotyped or imputed cis-eSNP with MAF≥0.01 are shown.
Probe_ID	Entrez Gene_ID	Symbol	Probe Chr	Tx_Start	Tx_End	Smaller_P	SNP (direct)	dbsnp_rsid	SNP Chr1	SNP_Pos1	Minor Allele1	Major Allele1	MAF1	Beta1	P-value1	FDR1	SNP (imputed)	SNPChr2	SNP_Pos2	Minor Allele2	Major Allele2	MAF2	Beta2	Pvalue2
ILMN_2363586	6386	SDCBP	8	59465727	59495419	imputed	rs10102400	rs10102400	8	59462042	T	C	0.042	-0.370916	7.28651e-20	1.32569e-15	rs148180928	8	59490095	A	T	0.048	-0.434119	3.67874e-33
ILMN_1711899	302	ANXA2	15	60639349	60690185	imputed	kgp3723515	rs34319556	15	60713555	A	C	0.032	0.640307	4.06622e-17	5.42263e-13	rs147092449	15	60689451	T	C	0.024	0.935089	8.85529e-30
ILMN_2396648	51013	EXOSC1	10	99195665	99205768	imputed	kgp21940655	rs29001317	10	99225886	T	G	0.024	-0.299149	2.93575e-22	6.79317e-18	rs114100765	10	99198897	G	C	0.026	-0.27862	1.73789e-24
ILMN_1680129	54888	NSUN2	5	6599351	6633473	imputed	kgp8777787	rs2303711	5	6602544	T	C	0.222	0.102438	2.30916e-20	4.41771e-16	rs2303707	5	6605532	C	A	0.224	0.102662	1.67754e-20
ILMN_1660436	3304	HSPA1B	6	31795511	31798031	imputed	exm-rs3115673	rs3115673	6	31810085	A	C	0.298	-0.244892	2.30931e-18	3.5815e-14	rs613165	6	31834398	A	G	0.294	-0.250154	2.18203e-20
ILMN_2383349	55240	STEAP3	2	119981383	120023227	imputed	rs11123512	rs11123512	2	120048537	G	A	0.306	-0.104981	1.58243e-18	2.49672e-14	rs1530562	2	120048729	A	G	0.304	-0.105289	1.11666e-18
ILMN_1697736	23404	EXOSC2	9	133569146	133580281	genotyped	kgp18406120	rs150457636	9	133580239	T	C	0.034	0.16865	4.9937e-17	6.5802e-13	chr9:133597218	9	133597218	G	T	0.034	0.16865	4.9937e-17
ILMN_1652371	222223	KIAA1324L	7	86506222	86595291	imputed	kgp13589464	rs34768475	7	86703609	G	A	0.05	0.204028	2.14995e-10	1.01367e-06	chr7:86694663	7	86694663	A	T	0.038	0.281018	2.73008e-15
ILMN_2055477	23016	EXOSC7	3	45017740	45052962	imputed	rs6781154	rs6781154	3	44992695	C	T	0.268	-0.105438	3.21862e-12	2.13004e-08	rs17557370	3	45050710	G	A	0.334	-0.101787	5.07469e-15
ILMN_1784516	118491	TTC18	10	75013515	75118617	genotyped	kgp3692034	rs74364724	10	75164517	T	C	0.1546	-0.0600884	1.18039e-11	7.06893e-08	rs57006370	10	75306393	C	T	0.228	-0.0513177	2.39738e-11
ILMN_1795822	115752	DIS3L	15	66585632	66626236	imputed	kgp12054869	rs3803412	15	66618342	G	A	0.13	-0.126339	8.69857e-11	4.41021e-07	rs147864813	15	66597188	A	G	0.17	-0.111852	3.88054e-11
ILMN_1779182	26022	TMEM98	17	31254927	31268667	imputed	kgp14069478	rs116750233	17	31259879	T	C	0.036	-0.294159	7.4317e-10	3.1387e-06	rs114614149	17	31289215	G	A	0.038	-0.306119	4.04965e-11
ILMN_1656638	635	BHMT	5	78407603	78428113	imputed	kgp10823867	rs248381	5	78337225	A	G	0.2883	0.0357607	1.20908e-07	0.000307082	rs5012505	5	78382835	A	G	0.204	0.049204	1.27747e-10
ILMN_2052331	4653	MYOC	1	171604556	171621773	genotyped	rs235913	rs235913	1	171618656	A	C	0.186	-0.224844	1.38513e-10	6.76529e-07	rs10157798	1	171626941	T	G	0.48	0.168978	7.33668e-10
ILMN_2395156	5549	PRELP	1	203444882	203460479	imputed	rs16851710	rs16851710	1	203459718	A	G	0.294	-0.0668631	1.01989e-08	3.3578e-05	rs2233724	1	203452226	C	T	0.296	0.0784965	1.58306e-10
ILMN_1755134	3308	HSPA4	5	132387661	132440709	imputed	kgp3996962	rs72801445	5	132388959	T	C	0.252	0.0391786	1.72009e-09	6.7321e-06	rs56121115	5	132409074	G	A	0.258	0.0401294	6.45282e-10
ILMN_1707380	5549	PRELP	1	203444882	203460479	imputed	rs16851710	rs16851710	1	203459718	A	G	0.294	-0.0640124	7.31569e-09	2.47959e-05	rs2233724	1	203452226	C	T	0.296	0.0707498	1.43311e-09
ILMN_1740265	11332	ACOT7	1	6324331	6445883	genotyped	kgp15480448	rs77120239	1	6324386	T	C	0.05	-0.176036	1.67076e-09	6.5627e-06	rs141597334	1	6330522	A	G	0.048	-0.129477	3.19296e-06
ILMN_2052335	4653	MYOC	1	171604556	171621773	genotyped	rs235913	rs235913	1	171618656	A	C	0.186	-0.277922	2.3561e-09	8.95431e-06	rs10913408	1	171626080	G	T	0.488	0.221258	2.60728e-09
ILMN_1658660	70	ACTC1	15	35080296	35087927	imputed	kgp19932887	rs77849105	15	34285966	A	G	0.066	0.186037	2.08211e-05	0.0244493	rs114344838	15	34725755	C	T	0.016	0.491005	8.31471e-09
ILMN_2229839	5912	RAP2B	3	152880000	152888413	imputed	kgp18120640	rs114197684	3	152882525	G	A	0.1225	-0.0434007	1.85348e-08	5.74091e-05	rs115299186	3	152873786	A	G	0.124	-0.0436705	1.25091e-08
ILMN_1815308	6382	SDC1	2	20400557	20425194	imputed	kgp1334842	rs79534336	2	20715355	G	A	0.028	0.130932	8.08004e-05	0.068781	rs114461998	2	20876822	A	G	0.01	0.321704	2.53302e-08
ILMN_1744381	5054	SERPINE1	7	100770369	100782547	imputed	exm643862	rs113022012	7	100648044	G	C	0.01205	0.22192	0.000161493	0.111617	rs115390630	7	101628751	A	G	0.018	0.261354	4.56735e-08
ILMN_1670218	118460	EXOSC6	16	70284133	70285833	genotyped	rs4985407	rs4985407	16	70285901	A	G	0.198	0.0745221	9.72861e-08	0.000253044	rs9927553	16	70409844	T	C	0.184	0.0764053	2.50875e-07
ILMN_1721888	3674	ITGA2B	17	42449549	42466873	genotyped	kgp13851257	rs76783532	17	42422638	T	G	0.01807	0.171198	1.23959e-07	0.000313829	chr17:41910222	17	41910222	A	G	0.016	0.143235	3.60231e-05
ILMN_1809477	23589	CARHSP1	16	8946798	8962258	imputed	kgp789320	rs8045712	16	9851122	T	C	0.188	0.0766243	4.31326e-05	0.0433085	rs4302031	16	8929051	C	G	0.152	-0.105234	2.40199e-07
ILMN_1747146	7251	TSG101	11	18501857	18548503	imputed	rs3781640	rs3781640	11	18503737	G	A	0.03	-0.0974004	0.000127864	0.0950749	rs11024699	11	18549566	A	T	0.318	-0.0503541	2.58924e-07
ILMN_1755120	10905	MAN1A2	1	117910084	118068320	genotyped	rs1316011	rs1316011	1	117941924	C	T	0.16	0.0499096	3.74653e-07	0.000826759	rs1289820	1	117921039	T	G	0.162	0.0475431	1.29337e-06
ILMN_1713995	6337	SCNN1A	12	6456008	6484905	genotyped	kgp12418867	rs117409748	12	6749947	A	C	0.014	0.192175	4.03984e-07	0.000882853	chr12:6158740	12	6158740	C	T	0.016	0.145007	5.37396e-05
ILMN_1763837	290	ANPEP	15	90328125	90358072	imputed	rs1699487	rs1699487	15	90467792	G	A	0.288	0.0588173	8.49063e-05	0.0712598	rs11635469	15	90358119	G	A	0.5	-0.0693386	4.69877e-07
ILMN_1714567	79026	AHNAK	11	62283373	62314332	imputed	GA009788	rs75471190	11	61616322	G	A	0.1406	-0.1021	3.48045e-06	0.00557144	rs916924	11	61619181	C	T	0.158	-0.104238	6.12907e-07
ILMN_1680453	81618	ITM2C	2	231729664	231743969	imputed	kgp3934108	rs3111754	2	231733703	C	T	0.24	0.0937189	1.04064e-06	0.00199194	rs3111751	2	231736107	A	G	0.232	0.0977494	6.54945e-07
ILMN_2270845	54663	WDR74	11	62600382	62607628	imputed	rs870073	rs870073	11	63313922	T	G	0.06	0.108937	0.00102842	0.322591	chr11:63436482	11	63436482	G	T	0.022	0.256722	7.17745e-07
ILMN_1776857	358	AQP1	7	30951414	30965131	imputed	rs1465216	rs1465216	7	30935748	T	C	0.246	0.0904014	3.86432e-06	0.00608904	rs7786959	7	30862956	C	A	0.318	0.0800022	7.76952e-07
ILMN_1807300	5311	PKD2	4	88928798	88998931	genotyped	kgp11192531	rs998654	4	89678690	A	G	0.2149	-0.107615	8.23196e-07	0.00162671	rs1452903	4	89679183	C	G	0.218	-0.105223	1.04009e-06
ILMN_1708936	51010	EXOSC3	9	37779710	37785089	genotyped	kgp18401847	rs58540322	9	37873981	A	G	0.058	-0.104748	1.23794e-06	0.00231827	rs7859678	9	37853141	T	C	0.058	-0.104748	1.23794e-06
ILMN_1682054	6717	SRI	7	87834431	87849399	imputed	kgp5177083	rs28381905	7	87178055	T	C	0.024	0.107836	5.60583e-05	0.0526391	rs28381806	7	87228060	C	T	0.02	0.139587	1.39986e-06
ILMN_2409167	302	ANXA2	15	60639349	60690185	genotyped	rs17303453	rs17303453	15	61407523	C	T	0.014	-0.380362	1.4395e-06	0.0026377	rs17237696	15	61407066	T	C	0.014	-0.380362	1.4395e-06
ILMN_1734194	51010	EXOSC3	9	37779710	37785089	imputed	kgp18401847	rs58540322	9	37873981	A	G	0.058	-0.0827192	1.97043e-05	0.0234018	rs7029518	9	37782561	G	C	0.232	0.051012	1.6745e-06
ILMN_1720996	6558	SLC12A2	5	127419482	127525380	imputed	kgp22578920	rs11957308	5	127524857	C	T	0.046	0.146031	0.000862932	0.296629	rs116049163	5	127211888	G	A	0.016	0.337984	2.00994e-06
ILMN_1665859	5873	RAB27A	15	55495163	55563107	genotyped	kgp19830958	rs11540399	15	55474193	G	C	0.122	0.0526369	2.39354e-06	0.00406391	rs75303345	15	55473421	A	C	0.124	0.0508547	3.09285e-06
ILMN_1711311	5420	PODXL	7	131185020	131241376	imputed	rs11978264	rs11978264	7	131356066	A	G	0.156	-0.0634891	5.86293e-06	0.00866377	rs111866353	7	131351982	A	G	0.136	-0.0718024	2.40918e-06
ILMN_1681103	358	AQP1	7	30951414	30965131	imputed	rs1203181	rs1203181	7	30931307	T	C	0.2871	0.0991392	3.30125e-05	0.0352265	rs7786959	7	30862956	C	A	0.318	0.102232	2.47303e-06
ILMN_1652456	26022	TMEM98	17	31254927	31268667	imputed	kgp14069478	rs116750233	17	31259879	T	C	0.036	-0.074073	8.61811e-06	0.0119475	rs114614149	17	31289215	G	A	0.038	-0.0753133	3.42376e-06
ILMN_1674243	7037	TFRC	3	195776154	195808961	genotyped	kgp3573194	rs9325432	3	195874107	C	T	0.438	-0.168174	3.71857e-06	0.00589559	rs114546536	3	194973225	A	G	0.016	0.527371	0.000135731
ILMN_2050790	91894	HSPB2-C11orf52	11	111789600	111797595	imputed	rs2518347	rs2518347	11	112093368	G	A	0.2388	0.0221878	0.00144814	0.376291	rs78979276	11	110954777	C	T	0.022	0.0899017	3.85737e-06
ILMN_2371911	4582	MUC1	1	155158299	155162706	imputed	rs577492	rs577492	1	156100739	A	G	0.4297	-0.0226024	0.000150565	0.106541	rs547915	1	156085375	T	C	0.496	0.0271022	3.91609e-06
ILMN_1721713	5393	EXOSC9	4	122722471	122738176	imputed	rs11723050	rs11723050	4	121814232	T	C	0.158	-0.0336838	0.000549924	0.234371	rs141011032	4	121917714	G	A	0.014	-0.132413	4.19735e-06
ILMN_2337336	5819	PVRL2	19	45349392	45392485	genotyped	kgp10789106	rs930462	19	45043069	G	T	0.2	0.0338096	4.68953e-06	0.0071744	rs73561940	19	45043810	C	G	0.11	0.0373386	7.96204e-05
ILMN_1694249	947	CD34	1	208059882	208084683	imputed	kgp15723078	rs149099494	1	207741193	C	T	0.02292	0.0684058	0.000137871	0.100261	rs74754127	1	208353153	C	T	0.034	0.0624956	5.49467e-06
ILMN_1658684	374868	ATP9B	18	76829396	77138282	imputed	rs2015612	rs2015612	18	77112916	G	T	0.238	-0.0237631	5.7911e-06	0.00857402	rs149091941	18	77092200	T	C	0.168	-0.0275323	5.66864e-06
ILMN_2413158	5420	PODXL	7	131185020	131241376	genotyped	rs1439794	rs1439794	7	130834659	T	C	0.04618	0.201679	5.81542e-06	0.0086037	rs17165458	7	130831509	T	C	0.092	0.132968	2.55576e-05
ILMN_1755937	302	ANXA2	15	60639349	60690185	imputed	kgp20046428	rs7176110	15	60451831	T	C	0.2036	-0.0850499	9.99439e-06	0.0135236	rs73433284	15	60453380	T	A	0.138	-0.0999344	6.37633e-06
ILMN_1698225	4644	MYO5A	15	52599479	52821247	imputed	kgp10456473	rs7165814	15	52985144	T	G	0.134	0.0669706	0.00013236	0.097353	rs12908307	15	53064447	C	T	0.176	0.0704499	7.00087e-06
ILMN_1714023	6553	SLC9A5	16	67282854	67306094	imputed	kgp3786945	rs13330273	16	67271106	C	T	0.338	0.0216043	1.4081e-05	0.0178783	rs8064216	16	67293155	C	G	0.332	0.0225481	7.03867e-06
ILMN_1747052	3676	ITGA4	2	182321618	182402468	imputed	kgp14517328	rs6723830	2	182050610	A	G	0.012	0.0990047	0.000124942	0.0935929	rs115098526	2	181857395	A	T	0.01	0.145516	7.43747e-06
ILMN_1660306	8516	ITGA8	10	15555947	15762334	imputed	kgp21756737	rs115681627	10	16329778	G	A	0.034	0.112349	8.27012e-05	0.0699155	rs79156495	10	16383058	A	G	0.03	0.131721	9.65474e-06
ILMN_2381397	3329	HSPD1	2	198351307	198364640	genotyped	rs1401097	rs1401097	2	198825810	A	G	0.042	-0.157804	9.65532e-06	0.0131407	rs138841267	2	198726419	G	A	0.01	-0.305898	1.44024e-05
ILMN_2366041	81618	ITM2C	2	231729664	231743969	imputed	rs1438145	rs1438145	2	231727399	G	A	0.424	0.0749456	1.65131e-05	0.0203169	rs3111751	2	231736107	A	G	0.232	0.0905628	1.26613e-05
ILMN_2411282	5768	QSOX1	1	180123967	180167169	genotyped	kgp15908308	rs114047415	1	179236509	T	C	0.024	-0.203802	1.42138e-05	0.0180149	rs77472191	1	179233088	A	G	0.024	-0.203802	1.42138e-05
ILMN_2390416	7917	BAG6	6	31606804	31620477	imputed	kgp17479801	rs115445135	6	32431116	C	T	0.03704	0.091748	0.000197576	0.127517	rs9501606	6	32196440	A	G	0.138	0.0523188	1.47654e-05
ILMN_1671326	26523	EIF2C1	1	36348809	36389899	genotyped	kgp15640158	rs79355955	1	36392728	A	G	0.03614	0.0671113	1.50737e-05	0.0188943	rs150663801	1	36484312	G	A	0.044	0.0594632	3.69769e-05
ILMN_1813117	3680	ITGA9	3	37493812	37861281	imputed	rs11709139	rs11709139	3	36517759	T	C	0.33	-0.0321931	2.88933e-05	0.0317408	rs34773966	3	36517657	T	G	0.336	-0.033369	1.54591e-05
ILMN_2352090	55890	GPRC5C	17	72429835	72443568	imputed	kgp5238083	rs2054400	17	72310476	G	A	0.308	0.0539357	6.07819e-05	0.0558836	rs9797243	17	72262660	G	A	0.146	-0.0724945	1.54845e-05
ILMN_1759910	5104	SERPINA5	14	95047705	95059457	imputed	kgp19633997	rs116414047	14	94349392	G	T	0.062	0.122715	2.14123e-05	0.0250233	rs111444526	14	94355920	A	G	0.066	0.121327	1.57774e-05
ILMN_1710740	717	C2	6	31895253	31913451	genotyped	kgp7241383	rs61761946	6	31933640	T	C	0.012	0.247613	1.85426e-05	0.0222766	rs111378116	6	31023013	A	G	0.07	0.0968284	3.72704e-05
ILMN_1689953	975	CD81	11	2398546	2418649	imputed	kgp5278513	rs200022848	11	3140253	C	T	0.2751	0.0479972	0.000985875	0.315992	rs74660522	11	2850445	T	G	0.018	-0.207745	2.28193e-05
ILMN_1774528	55890	GPRC5C	17	72427666	72443568	imputed	kgp8787117	rs72848268	17	72255808	T	C	0.026	0.0367637	0.00223606	0.449223	rs55642052	17	73034818	C	T	0.128	0.0225519	2.63035e-05
ILMN_1810608	87178	PNPT1	2	55861197	55921045	imputed	kgp14347694	rs6752067	2	55928910	A	G	0.3367	0.028988	0.000396564	0.194749	rs56744749	2	55089316	C	A	0.128	0.0459705	2.70461e-05
ILMN_2075507	10905	MAN1A2	1	117910084	118068320	imputed	kgp6082413	rs1289951	1	117913019	G	A	0.094	0.0443653	3.55851e-05	0.0373627	rs1581779	1	119067667	C	T	0.212	0.0339796	2.8438e-05
ILMN_1760247	970	CD70	19	6585849	6591163	imputed	kgp1550596	rs17516272	19	6604087	T	G	0.3947	0.0337514	3.88285e-05	0.0399368	rs115790393	19	7495631	T	C	0.016	0.117833	2.94705e-05
ILMN_1786720	8842	PROM1	4	15969848	16077741	imputed	kgp20733705	rs111801259	4	16650216	T	C	0.048	0.0542247	0.00159419	0.391979	rs151315797	4	15748196	T	C	0.014	0.132711	3.04888e-05
ILMN_1742187	4121	MAN1A1	6	119498365	119670931	imputed	kgp17361028	rs56007878	6	118875675	C	T	0.076	-0.125404	0.000193968	0.126005	rs75539386	6	118662943	T	C	0.084	-0.138415	3.14354e-05
ILMN_1704961	71	ACTG1	17	79476996	79479892	imputed	kgp1845798	rs2589143	17	78810687	T	G	0.168	-0.124127	4.33953e-05	0.0435064	rs7225574	17	78777941	T	G	0.456	-0.0895804	3.21609e-05
ILMN_1756992	4582	MUC1	1	155158299	155162706	imputed	kgp15551911	rs116678395	1	155152641	A	G	0.06426	-0.0848136	0.000135668	0.0990994	rs115777929	1	155149998	C	T	0.118	-0.0706368	3.52531e-05
ILMN_1704164	23400	ATP13A2	1	17312452	17338467	imputed	kgp15396727	rs116069091	1	16669351	G	A	0.02	-0.0724863	3.90577e-05	0.0401278	rs72638025	1	16708999	C	T	0.03	-0.0602575	3.54212e-05
ILMN_2402168	5394	EXOSC10	1	11126675	11159938	imputed	kgp15208161	rs61443570	1	10820488	T	C	0.072	-0.171235	7.47753e-05	0.0650337	rs113175202	1	10845018	A	G	0.042	-0.240233	3.88551e-05
ILMN_1686367	3312	HSPA8	11	122928199	122933043	imputed	kgp13015314	rs115325028	11	123164838	T	C	0.026	-0.271452	0.000171565	0.116264	rs114942001	11	123165807	T	G	0.024	-0.306631	4.06009e-05
ILMN_1774287	629	CFB	6	31913720	31919861	imputed	kgp2608942	rs9262563	6	31009079	A	C	0.014	0.4259	6.93616e-05	0.0615392	chr6:31904984	6	31904984	T	A	0.014	0.435151	4.30298e-05
ILMN_1736002	10987	COPS5	8	67955314	67974562	imputed	kgp28836777	rs143363878	8	67475851	G	A	0.016	-0.144914	0.000176245	0.118281	chr8:67432669	8	67432669	C	T	0.014	-0.167467	4.39093e-05
ILMN_1786034	51704	GPRC5B	16	19870292	19896151	imputed	kgp11919694	rs11647903	16	19240076	C	A	0.016	0.0719416	9.91459e-05	0.0796185	rs113708492	16	19199724	A	G	0.014	0.0798065	4.77733e-05
ILMN_2413084	3312	HSPA8	11	122928199	122933043	imputed	kgp13015314	rs115325028	11	123164838	T	C	0.026	-0.278509	0.000101682	0.0810668	rs114942001	11	123165807	T	G	0.024	-0.301219	4.93377e-05
ILMN_2212763	3385	ICAM3	19	10444451	10450345	imputed	kgp7453718	rs35571684	19	10087331	C	G	0.022	-0.347978	0.000173126	0.116894	rs189428175	19	10885459	A	T	0.01	0.54718	4.93502e-05
ILMN_1769822	9373	PLAA	9	26903367	26947468	imputed	rs10968017	rs10968017	9	27627074	G	T	0.17	-0.0206719	0.000446539	0.208688	rs140736215	9	27480595	A	G	0.026	0.0565872	4.99361e-05
ILMN_1694980	4669	NAGLU	17	40687950	40696466	genotyped	rs8176079	rs8176079	17	41275832	T	C	0.01406	0.167963	5.07737e-05	0.0488876	rs142099439	17	41516953	A	G	0.014	0.159697	0.000116994
ILMN_1794213	25864	ABHD14A	3	52009041	52015216	imputed	rs433823	rs433823	3	52012456	T	G	0.182	0.0506958	0.00016408	0.112807	rs323884	3	51964946	G	A	0.19	0.0524883	5.33761e-05
ILMN_1699525	6717	SRI	7	87834431	87856308	genotyped	kgp10851141	rs43115	7	87861520	G	A	0.312	0.0494155	5.39383e-05	0.051144	rs43107	7	87852406	A	T	0.312	0.0494155	5.39383e-05
ILMN_1792495	79026	AHNAK	11	62283373	62314332	imputed	GA009788	rs75471190	11	61616322	G	A	0.1406	-0.144364	0.000284296	0.16028	rs10897226	11	61952793	G	T	0.142	0.16104	5.46954e-05
ILMN_1731135	9230	RAB11B	19	8455204	8469317	imputed	kgp21502420	rs115836551	19	7851511	A	G	0.012	0.081235	0.000117098	0.0894745	rs140496361	19	9194782	A	G	0.028	0.0560241	5.89401e-05
ILMN_2400219	6717	SRI	7	87834431	87849399	genotyped	kgp13382932	rs79117433	7	88006896	C	T	0.042	-0.113289	5.93152e-05	0.0549017	rs116061378	7	88024797	A	G	0.042	-0.113289	5.93152e-05
ILMN_1677314	4582	MUC1	1	155158299	155162706	imputed	kgp15493691	rs114242660	1	156044253	T	C	0.05422	0.0374227	0.000189344	0.124004	rs182324534	1	156034354	C	T	0.014	0.0777631	6.17368e-05
ILMN_1658383	3310	HSPA6	1	161494035	161496687	imputed	rs4656279	rs4656279	1	160886294	G	A	0.272	0.0248576	7.59483e-05	0.0657943	rs11585292	1	160899128	C	T	0.226	0.0286182	6.24601e-05
ILMN_1755974	230	ALDOC	17	26900132	26903951	genotyped	kgp10838181	rs72846186	17	26863784	G	T	0.012	-0.871977	6.64288e-05	0.0596384	rs114621952	17	25941930	T	C	0.028	0.496671	0.000562532
ILMN_2312719	5393	EXOSC9	4	122722471	122738176	imputed	rs6816015	rs6816015	4	121887199	G	A	0.376	0.0556211	0.000189273	0.123972	rs12645372	4	121880938	G	T	0.244	0.0598321	7.20151e-05
ILMN_2053178	71	ACTG1	17	79476996	79479892	imputed	kgp588889	rs72490481	17	78837996	G	A	0.176	0.0451525	0.00134283	0.363819	rs9909563	17	78770960	T	A	0.43	-0.0412417	7.28427e-05
ILMN_2089073	10079	ATP9A	20	50213313	50384908	imputed	rs6096686	rs6096686	20	50586703	A	G	0.468	-0.0551286	0.000660216	0.258794	chr20:51334120	20	51334120	T	C	0.012	-0.301031	7.67041e-05
ILMN_1766499	3306	HSPA2	14	65007185	65009954	imputed	kgp9650580	rs35007032	14	65623809	G	A	0.116	0.0938535	0.000950966	0.310666	rs142880653	14	65766989	C	T	0.022	-0.22241	7.84499e-05
ILMN_2152131	60	ACTB	7	5566778	5570232	imputed	kgp6165207	rs73671904	7	4804892	A	G	0.1285	0.0961306	0.00078027	0.282171	chr7:4567046	7	4567046	A	G	0.01	-0.374884	7.86413e-05
ILMN_1792587	9525	VPS4B	18	61056424	61089752	genotyped	kgp16137943	rs17072223	18	61605345	A	G	0.146	-0.054243	8.08387e-05	0.068788	rs184819531	18	61604835	T	G	0.146	-0.054243	8.08387e-05
ILMN_1765409	8027	STAM	10	17686123	17758821	imputed	rs12768463	rs12768463	10	17550499	G	A	0.116	0.0420085	8.3513e-05	0.0704316	rs79393946	10	17564705	T	C	0.042	0.0686101	8.31554e-05
ILMN_2349831	23405	DICER1	14	95552564	95624347	genotyped	kgp10020891	rs1748949	14	96148664	A	G	0.05	0.246842	8.82606e-05	0.0732342	rs112156791	14	95416323	T	C	0.082	-0.169934	0.000894132
ILMN_1740938	348	APOE	19	45409005	45412652	imputed	exm-rs439401	rs439401	19	45414451	T	C	0.152	0.235439	0.000541398	0.232351	rs157594	19	45425175	T	G	0.156	0.259042	9.37785e-05
ILMN_1751500	8751	ADAM15	1	155023747	155035252	imputed	kgp6499696	rs7556519	1	155827546	C	T	0.258	-0.0334492	0.000907276	0.303794	rs5020058	1	155507543	A	T	0.252	-0.0405183	9.9174e-05
ILMN_1777296	60	ACTB	7	5566778	5570232	imputed	kgp7083650	rs6959539	7	5037032	G	C	0.034	-0.239596	0.000907327	0.303805	rs7455764	7	5277942	C	A	0.2	-0.127928	0.000105519
ILMN_2369682	3181	HNRNPA2B1	7	26229555	26240413	imputed	kgp987751	rs7798433	7	26397584	A	G	0.08032	0.109943	0.00145605	0.37717	rs111399899	7	25277300	G	A	0.064	-0.138854	0.000114198
ILMN_1706406	10079	ATP9A	20	50213313	50384908	imputed	kgp9022343	rs4811188	20	50137099	C	T	0.268	-0.0173049	0.0012356	0.350322	rs149165194	20	49523897	G	A	0.062	-0.039989	0.000115691
ILMN_1715994	9146	HGS	17	79650961	79669151	imputed	kgp645765	rs2289760	17	78854316	T	C	0.1325	-0.0519358	0.00215237	0.442387	chr17:79293292	17	79293292	A	C	0.048	0.101911	0.000121264
ILMN_1663042	6385	SDC4	20	43953928	43977064	imputed	kgp19231183	rs7269377	20	43999975	T	C	0.024	0.078539	0.00156855	0.389254	rs144719763	20	44912977	T	G	0.01	0.145058	0.0001265
ILMN_1718303	5819	PVRL2	19	45349392	45382198	imputed	kgp8290934	rs3729640	19	45381917	T	C	0.074	-0.0764223	0.000735254	0.273701	rs4260167	19	45587040	G	A	0.086	-0.0788353	0.00012757
ILMN_1805827	5464	PPA1	10	71962585	71993190	imputed	kgp10313891	rs112974203	10	72811829	A	G	0.03	-0.171381	0.000766838	0.279622	rs75128873	10	71751832	A	T	0.038	0.173557	0.000133697
ILMN_1724211	55890	GPRC5C	17	72427666	72443568	genotyped	kgp7877833	rs1568448	17	72912265	G	C	0.1265	-0.0279879	0.000139501	0.101102	rs11652995	17	72215095	G	A	0.344	-0.0179985	0.00022731
ILMN_1752582	5869	RAB5B	12	56367794	56390467	imputed	rs12308290	rs12308290	12	57008184	C	T	0.1365	0.0667912	0.000287266	0.161077	rs111834438	12	57097782	T	G	0.136	0.0700769	0.000140179
ILMN_1810387	9373	PLAA	9	26903367	26947468	genotyped	kgp10099868	rs2244606	9	27574978	A	G	0.452	0.0287796	0.000144997	0.103827	rs12345062	9	27578077	A	G	0.47	-0.02901	0.000147052
ILMN_2384544	8751	ADAM15	1	155023747	155035252	genotyped	rs1052176	rs1052176	1	155260383	C	A	0.498	-0.0623064	0.000145248	0.103954	rs187501196	1	154695262	T	C	0.014	0.248969	0.000169921
ILMN_1740917	6338	SCNN1B	16	23313590	23392620	imputed	kgp16468588	rs74575928	16	23148871	T	C	0.016	0.149106	0.00133475	0.362688	chr16:22825129	16	22825129	T	C	0.014	0.188245	0.00014655
ILMN_1714511	5071	PARK2	6	161768589	163148834	imputed	kgp6511623	rs3016558	6	162204946	A	C	0.322	-0.0182068	0.000203024	0.129724	rs9458372	6	162206998	A	G	0.24	-0.0204903	0.000148094
ILMN_1771333	961	CD47	3	107761940	107809935	genotyped	kgp8229578	rs709465	3	107708877	G	T	0.3407	-0.057029	0.000148792	0.105676	rs115301140	3	107856172	G	T	0.05	0.121589	0.000353982
ILMN_1694584	8218	CLTCL1	22	19166986	19279239	imputed	rs5992953	rs5992953	22	18481122	T	C	0.056	0.035805	0.000243078	0.14536	rs5992952	22	18480515	A	G	0.05	0.0388588	0.000149253
ILMN_3244096	196441	ZFC3H1	12	72003378	72057749	genotyped	kgp8369225	rs17797186	12	72896643	C	T	0.04	-0.0894891	0.00015181	0.107139	rs12424413	12	72908245	C	T	0.04	-0.0894891	0.00015181
ILMN_1750008	6832	SUPV3L1	10	70939959	70968854	imputed	rs1322829	rs1322829	10	70091051	A	C	0.1124	-0.0452273	0.000362468	0.185205	rs16925318	10	70086956	G	A	0.12	-0.0468287	0.000156882
ILMN_1769883	3416	IDE	10	94211440	94333852	imputed	kgp21758669	rs12257482	10	95290325	C	T	0.224	-0.0231708	0.0015532	0.387678	rs113192655	10	95274678	T	C	0.04	-0.0616496	0.000160269
ILMN_1756779	1213	CLTC	17	57697049	57774317	imputed	kgp10051156	rs74918090	17	56707277	T	C	0.07692	0.188737	0.000350522	0.181536	rs116159977	17	56743960	G	T	0.092	0.184247	0.000163233
ILMN_2169439	3685	ITGAV	2	187454789	187545629	imputed	kgp14163966	rs77677375	2	188511215	C	A	0.02	-0.206598	0.00125219	0.35234	chr2:188502006	2	188502006	C	T	0.026	-0.210515	0.000185632
ILMN_1792679	3678	ITGA5	12	54789044	54813050	imputed	rs10876556	rs10876556	12	54758960	A	G	0.198	0.049029	0.00037496	0.188551	rs2077177	12	54418857	T	C	0.434	0.0388544	0.000190753
ILMN_1803590	196441	ZFC3H1	12	72003378	72057749	genotyped	kgp12086129	rs12810964	12	72302333	A	G	0.036	-0.070028	0.000192425	0.125335	chr12:72909892	12	72909892	G	A	0.016	-0.0974642	0.000405983
ILMN_1756920	8751	ADAM15	1	155023747	155035252	imputed	exm104079	rs61739738	1	154295594	C	T	0.102	0.113482	0.000282734	0.159746	rs149527125	1	154344843	A	G	0.024	-0.205393	0.000196268
ILMN_1806165	3310	HSPA6	1	161494035	161496687	imputed	kgp15459418	rs74128278	1	162358664	A	G	0.08	-0.176968	0.000800569	0.285813	rs16832777	1	161267513	G	A	0.032	0.295997	0.000201495
ILMN_1772692	23405	DICER1	14	95552564	95624347	genotyped	rs742892	rs742892	14	95152253	C	T	0.086	-0.0849534	0.000208724	0.132074	rs7158880	14	95686129	T	C	0.376	-0.0468143	0.000649076
ILMN_1809751	192669	EIF2C3	1	36396682	36522063	imputed	kgp15851404	rs77070078	1	37409135	A	G	0.044	-0.0315829	0.00402669	0.547228	rs142571955	1	37291048	C	T	0.012	0.0781911	0.000211658
ILMN_1693259	10015	PDCD6IP	3	33840062	33911199	imputed	kgp5279469	rs72854778	3	33071945	T	G	0.07	0.0789765	0.000478103	0.217223	rs147981134	3	34202520	G	A	0.02	-0.158297	0.00021897
ILMN_2070521	23743	BHMT2	5	78365546	78385897	genotyped	rs250513	rs250513	5	78302196	T	C	0.164	-0.110684	0.000223199	0.137823	rs57512646	5	78817888	G	A	0.268	-0.0885722	0.000572148
ILMN_1782939	213	ALB	4	74269971	74287129	imputed	kgp6320924	rs72661006	4	73709923	T	C	0.012	-0.0989578	0.00278214	0.485282	rs11930978	4	74700826	T	C	0.382	-0.0254966	0.000237263
ILMN_1659725	56915	EXOSC5	19	41892275	41903256	imputed	rs10410907	rs10410907	19	41033109	T	C	0.3092	-0.0199896	0.00117277	0.342512	rs200795716	19	41273444	G	A	0.014	0.0942641	0.000237333
ILMN_2329773	5873	RAB27A	15	55495163	55562592	imputed	rs881868	rs881868	15	56083135	G	T	0.042	-0.0483211	0.00122587	0.349145	rs62018202	15	55405589	A	G	0.204	-0.02593	0.000248377
ILMN_3241758	728378	POTEF	2	130831107	130886795	imputed	kgp11560528	rs2079029	2	130387775	T	C	0.162	-0.0807922	0.00178698	0.411185	rs76032867	2	130053174	G	C	0.094	-0.124069	0.000251629
ILMN_2184184	301	ANXA1	9	75766780	75785307	genotyped	rs7357731	rs7357731	9	75789935	G	A	0.244	0.0845868	0.000257459	0.150928	rs7854415	9	75789730	T	G	0.21	0.0853078	0.000516133
ILMN_1756162	11340	EXOSC8	13	37574677	37583751	imputed	rs9547829	rs9547829	13	37954091	G	A	0.094	0.0766791	0.00129124	0.357285	rs113976175	13	37307258	C	T	0.02	0.171894	0.000258294
ILMN_2124769	4904	YBX1	1	43148065	43168020	imputed	kgp15174689	rs116734288	1	43703379	C	T	0.01	0.212707	0.000447695	0.209003	rs4306169	1	43431433	A	G	0.372	0.0454049	0.000259936
ILMN_1734550	6550	SLC9A3	5	473333	524549	imputed	kgp7349466	rs11744772	5	1385574	A	G	0.1815	0.0344726	0.000853609	0.294977	rs13181961	5	893356	G	C	0.128	-0.0442845	0.0002689
ILMN_2109994	53916	RAB4B	19	41284123	41302849	imputed	kgp21463739	rs78698767	19	40373973	A	G	0.03814	-0.0548701	0.00209418	0.437686	chr19:40383766	19	40383766	T	C	0.068	-0.0491779	0.00026981
ILMN_1712312	8766	RAB11A	15	66161796	66184329	genotyped	kgp6648694	rs2469155	15	66973474	G	A	0.1331	0.060389	0.000276149	0.157569	rs145593218	15	67021314	G	A	0.018	0.132139	0.000498655
ILMN_1803136	53916	RAB4B	19	41284123	41302849	genotyped	kgp6506022	rs33933140	19	40739513	G	A	0.172	0.0260764	0.000282983	0.159842	rs9710247	19	40760449	G	A	0.184	0.0253065	0.000303308
ILMN_1792075	933	CD22	19	35820071	35838264	genotyped	rs1005194	rs1005194	19	36467594	A	G	0.248	-0.0165777	0.000289733	0.161911	rs74941368	19	35771111	T	C	0.036	0.0377999	0.000569077
ILMN_1799796	22894	DIS3	13	73329539	73356266	imputed	kgp16659391	rs78376166	13	74248377	A	G	0.03	-0.0709597	0.00079275	0.284307	rs148800869	13	74254962	G	T	0.036	-0.0700638	0.000291997
ILMN_1745271	54512	EXOSC4	8	145133521	145135551	imputed	rs1011211	rs1011211	8	145663689	T	G	0.436	0.0214774	0.00210501	0.438589	rs114329029	8	144742729	G	C	0.022	0.0814092	0.000306259
ILMN_1799232	10079	ATP9A	20	50213313	50384908	imputed	kgp19227148	rs73912722	20	49994763	G	A	0.024	0.0740219	0.000496461	0.221729	rs6021627	20	50631475	G	A	0.026	0.0738921	0.000306944
ILMN_1751708	9445	ITM2B	13	48807273	48836232	imputed	rs2104373	rs2104373	13	48452461	C	T	0.394	-0.0375385	0.0023904	0.460081	rs2104374	13	48447766	C	T	0.474	-0.0439665	0.000314957
ILMN_1706304	192670	EIF2C4	1	36273827	36323490	imputed	kgp9144970	rs77166184	1	36053642	T	C	0.05	0.03781	0.000416482	0.200396	rs10908378	1	35327671	A	T	0.192	-0.0204794	0.000334913
ILMN_1677824	5867	SPHAR	1	229406808	229441640	imputed	rs6671343	rs6671343	1	230122064	T	C	0.066	0.0449699	0.000573299	0.239692	rs74144438	1	229802850	T	C	0.146	-0.0344978	0.000335631
ILMN_1677590	5912	RAP2B	3	152880000	152888413	imputed	kgp2555791	rs35892497	3	152291687	A	G	0.11	-0.0225995	0.00175493	0.408167	rs12633174	3	152143625	G	A	0.206	-0.0197148	0.000339636
ILMN_1711189	5394	EXOSC10	1	11126675	11159938	imputed	rs3010217	rs3010217	1	11496715	C	T	0.154	0.0481228	0.00182158	0.414395	rs35316056	1	11500297	A	G	0.196	-0.0477655	0.000341402
ILMN_1695423	928	CD9	12	6309481	6347437	genotyped	kgp18753976	rs73266998	12	6844632	G	A	0.078	-0.162618	0.000343007	0.179169	rs73266993	12	6843118	T	C	0.078	-0.162618	0.000343007
ILMN_1655913	4925	NUCB2	11	17298285	17353070	genotyped	rs2074308	rs2074308	11	17452580	A	G	0.032	-0.265601	0.000348016	0.180735	rs76970850	11	18040536	C	T	0.014	0.357758	0.00112077
ILMN_1677404	5911	RAP2A	13	98086474	98120252	imputed	rs7329435	rs7329435	13	97519611	C	T	0.3534	0.0540058	0.000524802	0.228562	rs77445669	13	98916275	C	T	0.03	-0.161935	0.000362496
ILMN_2038777	60	ACTB	7	5566778	5570232	imputed	kgp13745490	rs73673284	7	5105330	T	C	0.028	0.225899	0.000681202	0.263205	rs7455764	7	5277942	C	A	0.2	-0.106117	0.000376142
ILMN_2332250	11332	ACOT7	1	6324331	6453826	imputed	kgp10751040	rs12739426	1	7386456	A	C	0.2912	0.0360744	0.000424279	0.202555	rs113070813	1	6139510	T	C	0.014	0.136711	0.000377432
ILMN_1670796	5394	EXOSC10	1	11126675	11159938	imputed	kgp15463978	rs72869161	1	10571725	T	C	0.014	-0.143908	0.00112832	0.336922	rs28730695	1	11318807	C	G	0.084	-0.066887	0.000379818
ILMN_1769083	2940	GSTA3	6	52761438	52774496	genotyped	rs2397107	rs2397107	6	52668449	G	A	0.1209	0.0219129	0.000395525	0.194472	chr6:52691860	6	52691860	C	T	0.012	0.0473913	0.00133031
ILMN_1712888	10808	HSPH1	13	31709110	31736158	genotyped	kgp16747209	rs113984359	13	31397009	A	G	0.016	0.250888	0.000396808	0.194828	chr13:31412661	13	31412661	C	T	0.016	0.250888	0.000396808
ILMN_3242016	445582	POTEE	2	131975923	132022416	imputed	kgp974124	rs60011031	2	132301755	C	T	0.1939	0.0210318	0.000546286	0.233544	rs113448872	2	132294761	G	C	0.366	0.0169396	0.000423343
ILMN_2059452	6558	SLC12A2	5	127419482	127525380	imputed	kgp22068727	rs77383097	5	128401991	G	A	0.022	0.278548	0.000886756	0.300389	rs76592146	5	126842323	A	G	0.016	0.371427	0.00042964
ILMN_1651513	23517	SKIV2L2	5	54603575	54721409	imputed	kgp228541	rs7823	5	53751988	T	C	0.246	0.0481699	0.00179412	0.411896	rs77325025	5	55021844	A	G	0.046	-0.106003	0.000447737
ILMN_1671703	59	ACTA2	10	90694830	90712580	genotyped	kgp21798037	rs116231899	10	91123832	G	A	0.022	0.542056	0.000456058	0.21135	rs116266611	10	91113383	C	G	0.022	0.542056	0.000456058
ILMN_3243156	113146	AHNAK2	14	105403590	105444694	imputed	kgp19513093	rs116374003	14	105288486	C	G	0.012	0.324937	0.000856267	0.295468	rs182038096	14	104896124	G	A	0.022	0.253491	0.000457067
ILMN_2052891	5311	PKD2	4	88928798	88998931	imputed	kgp7758576	rs2602117	4	89629066	T	C	0.1964	-0.0765844	0.000562461	0.237263	rs2670623	4	89973910	G	A	0.046	-0.144563	0.000464218
ILMN_1740351	9798	IST1	16	71929395	71964540	imputed	kgp16362096	rs138432306	16	72820425	C	T	0.01205	-0.126958	0.00311512	0.504265	rs142323758	16	71411246	G	A	0.01	0.16233	0.00046458
ILMN_1758229	5768	QSOX1	1	180123967	180167169	imputed	rs17374151	rs17374151	1	180873153	G	A	0.068	-0.0272587	0.00223928	0.449534	rs72720953	1	180531872	A	C	0.01	0.0849429	0.000465198
ILMN_1716524	7879	RAB7A	3	128444978	128533641	imputed	kgp17564023	rs6779413	3	128695809	A	G	0.196	-0.0517367	0.00152663	0.384819	rs138716102	3	129017133	G	C	0.02	-0.159692	0.000473924
ILMN_1739734	8218	CLTCL1	22	19166986	19279239	imputed	rs5747339	rs5747339	22	18229187	C	T	0.4418	0.0153146	0.00189293	0.420857	chr22:19263543	22	19263543	T	A	0.358	0.0177045	0.000482672
ILMN_1761049	192669	EIF2C3	1	36396682	36522063	genotyped	exm43447	rs74780395	1	35496174	C	T	0.014	0.0811058	0.000491737	0.220644	rs112076937	1	35514371	T	C	0.014	0.0811058	0.000491737
ILMN_2363591	6386	SDCBP	8	59465727	59495419	imputed	kgp20360203	rs111732815	8	58569880	G	A	0.09438	-0.0894391	0.000821421	0.289485	rs185247199	8	58574944	T	A	0.092	-0.0938646	0.000496856
ILMN_1756982	1192	CLIC1	6	31698357	31704341	imputed	kgp10366633	rs12206131	6	31414010	G	A	0.014	-0.215213	0.00246477	0.465057	rs115820891	6	31375529	T	G	0.012	-0.266795	0.000500805
ILMN_1667295	114990	VASN	16	4421848	4433529	imputed	kgp9388926	rs73503978	16	3962432	C	T	0.466	-0.058884	0.0047507	0.574463	rs142480582	16	3851852	A	G	0.016	-0.289894	0.00050322
ILMN_1761566	84418	C5orf32	5	139554652	139623374	genotyped	kgp22811698	rs200302949	5	139623146	A	G	0.012	0.214448	0.000512841	0.225682	rs112754032	5	139003216	T	A	0.02	0.138362	0.00456941
ILMN_1677305	5817	PVR	19	45147097	45169428	genotyped	kgp4954031	rs10445571	19	45571781	T	C	0.452	0.0245502	0.000522775	0.228027	rs10419815	19	45569009	C	T	0.468	0.0228656	0.000801637
ILMN_1741148	226	ALDOA	16	30075599	30081741	imputed	kgp12012018	rs34499019	16	30501609	T	C	0.0743	-0.100832	0.00282873	0.488255	rs113711981	16	30572096	A	G	0.01	-0.316509	0.000536156
ILMN_1736597	7086	TKT	3	53259652	53290130	imputed	kgp17799980	rs13326101	3	53736995	A	G	0.042	0.172461	0.00236176	0.458161	rs11927005	3	53626960	C	T	0.036	0.208765	0.000571419
ILMN_2193980	10058	ABCB6	2	220074487	220083712	imputed	kgp8581191	rs75191989	2	220992551	A	G	0.084	-0.0784527	0.000612496	0.248663	rs147975335	2	219677723	A	G	0.016	0.171978	0.000598874
ILMN_1732799	947	CD34	1	208059882	208084683	genotyped	kgp24789798	rs140094839	1	207589009	T	C	0.01406	-0.272948	0.00063446	0.253315	chr1:207434882	1	207434882	T	C	0.028	0.193414	0.000765891
ILMN_1705364	7917	BAG6	6	31606804	31620477	imputed	kgp12404600	rs6919603	6	31175912	G	A	0.2711	-0.0212479	0.00114768	0.339302	chr6:31221116	6	31221116	T	G	0.262	0.0218232	0.000648599
ILMN_1795325	72	ACTG2	2	74120092	74146780	genotyped	kgp3697241	rs753554	2	73161447	G	A	0.012	1.30155	0.000675856	0.262062	rs77449306	2	73155980	C	T	0.014	1.08231	0.00267368
ILMN_1695719	27161	EIF2C2	8	141541263	141645646	imputed	rs922279	rs922279	8	140898666	T	C	0.1321	0.085943	0.00239863	0.460639	rs138250721	8	141253671	A	G	0.01	0.326406	0.000678455
ILMN_1812226	3383	ICAM1	19	10381516	10397291	genotyped	kgp4802602	rs73508826	19	10211507	A	G	0.1687	0.024683	0.000679705	0.262901	rs2075741	19	10401098	C	G	0.15	-0.0258466	0.00087407
ILMN_3273854	3181	HNRNPA2B1	7	26229555	26240413	imputed	kgp11777560	rs6963094	7	26119078	C	G	0.026	0.117404	0.00167996	0.400608	rs2562794	7	26327516	C	T	0.012	0.182174	0.000682037
ILMN_1762932	27243	CHMP2A	19	59062932	59066370	genotyped	kgp8625567	rs8105935	19	58821088	C	T	0.086	0.0554813	0.000684405	0.263788	rs77193614	19	58820450	G	A	0.088	0.0548518	0.000732035
ILMN_1683883	95	ACY1	3	52017299	52023218	imputed	rs433823	rs433823	3	52012456	T	G	0.182	0.081796	0.00069232	0.265409	rs9683234	3	52030820	C	G	0.16	0.0874083	0.000691497
ILMN_1671893	27243	CHMP2A	19	59062932	59066491	imputed	kgp21513737	rs77197580	19	58992467	A	G	0.076	0.0613626	0.00344238	0.52089	chr19:58822293	19	58822293	G	A	0.012	-0.176465	0.000702967
ILMN_1766171	11267	SNF8	17	47007458	47022154	imputed	kgp657795	rs1509638	17	46558495	A	G	0.1	0.0983664	0.00470769	0.573066	rs192358621	17	48011546	T	C	0.012	-0.264798	0.000706741
ILMN_3235632	304	ANXA2P2	9	33624222	33625532	genotyped	kgp7906952	rs4878534	9	33354937	A	G	0.022	-0.0650135	0.000717757	0.270346	rs41274035	9	33310993	A	G	0.022	-0.0650135	0.000717757
ILMN_1669645	5310	PKD1	16	2138710	2185899	imputed	rs8064128	rs8064128	16	2832757	A	G	0.04	-0.0605383	0.00174411	0.407004	rs12103291	16	1859602	G	C	0.016	0.0995024	0.000762419
ILMN_1713807	57134	MAN1C1	1	25943958	26112698	imputed	kgp15396447	rs116308196	1	25324434	A	G	0.02	0.108825	0.00770956	0.648618	rs182078931	1	25328683	C	T	0.018	0.142325	0.000829932
ILMN_2153916	3306	HSPA2	14	65007185	65009954	imputed	rs11629135	rs11629135	14	64913111	A	G	0.21	-0.0650857	0.00101142	0.320045	rs12100605	14	65610039	T	G	0.454	0.0570488	0.00084565
ILMN_1755203	8029	CUBN	10	16865964	17171816	imputed	kgp8179459	rs7079381	10	17041210	C	A	0.124	0.0241219	0.0014221	0.373249	rs12249286	10	15946951	C	A	0.256	0.0183422	0.000933624
ILMN_1687785	27068	PPA2	4	106290233	106395227	genotyped	kgp6269817	rs13141889	4	106396564	C	A	0.1586	0.0702687	0.000959239	0.311911	rs2544429	4	106713998	G	T	0.196	-0.0623664	0.00116787
ILMN_3178792	3181	HNRNPA2B1	7	26229555	26240413	imputed	rs1159802	rs1159802	7	25857409	A	C	0.09	-0.127844	0.00226456	0.451305	rs111399899	7	25277300	G	A	0.064	-0.155723	0.000976964
ILMN_1714602	942	CD86	3	121796695	121839988	imputed	kgp17957807	rs79509318	3	121737755	A	G	0.01215	0.272057	0.00274377	0.482849	rs4434100	3	122192272	C	G	0.012	0.295093	0.00111101
ILMN_2051408	87178	PNPT1	2	55861197	55921045	genotyped	kgp9627083	rs4671268	2	56358312	C	A	0.238	-0.0582712	0.00112799	0.336885	rs11890399	2	56397247	T	C	0.02	0.170829	0.00119589
ILMN_1766713	3329	HSPD1	2	198351307	198364640	imputed	rs10170042	rs10170042	2	199074804	A	C	0.242	0.0545805	0.00449071	0.565443	rs4850445	2	199067825	T	A	0.234	0.0627947	0.0012546
ILMN_1734814	3308	HSPA4	5	132387661	132440709	imputed	kgp11589194	rs372289	5	132928148	T	C	0.222	-0.0594617	0.00138859	0.369223	rs116790363	5	133221668	C	A	0.054	0.115372	0.00138768
ILMN_1813043	23743	BHMT2	5	78365546	78385897	imputed	kgp22686605	rs115096695	5	78356055	G	A	0.054	0.145995	0.00293249	0.494356	rs9293751	5	77778296	A	G	0.328	0.0711337	0.0014365
ILMN_1789074	3303	HSPA1A	6	31783290	31785719	genotyped	kgp4453662	rs9295939	6	30953968	G	A	0.03	0.354916	0.00147207	0.378963	rs2071289	6	32135136	A	C	0.012	0.544324	0.00170766
ILMN_1773865	3309	HSPA5	9	127997126	128003666	imputed	kgp10232873	rs2416999	9	128863936	A	G	0.1546	0.0669781	0.0029901	0.497592	rs183176743	9	128842184	T	C	0.024	0.168299	0.0016682
ILMN_1784367	3329	HSPD1	2	198351307	198364640	imputed	kgp14161226	rs78234465	2	197680680	T	G	0.08	0.0411693	0.00393699	0.543361	rs139821005	2	198379752	T	C	0.012	0.117192	0.00170767
ILMN_1708946	27183	VPS4A	16	69345286	69358946	genotyped	kgp16230541	rs78197208	16	68547015	T	G	0.1667	0.0421345	0.00208172	0.436632	rs141409029	16	68545798	A	T	0.174	0.0405009	0.00237535
ILMN_1695157	762	CA4	17	58227301	58236906	genotyped	kgp14096063	rs61738392	17	57297939	A	G	0.09677	0.159031	0.00248614	0.466375	rs114096577	17	57242270	G	T	0.084	0.167766	0.00295864
ILMN_1720829	7538	ZFP36	19	39897486	39900052	imputed	kgp9052960	rs8103033	19	40170053	A	G	0.1225	0.211017	0.0045521	0.567785	chr19:40697674	19	40697674	T	C	0.022	0.505006	0.00249708
ILMN_1656621	27243	CHMP2A	19	59062932	59066491	imputed	kgp21379752	rs115156092	19	58628877	A	G	0.032	-0.109402	0.00330165	0.514029	rs140265363	19	58111979	G	A	0.01	-0.193126	0.00309624
ILMN_1732468	22824	HSPA4L	4	128703452	128754526	imputed	kgp1422941	rs114287335	4	129724562	T	C	0.01	-0.0578084	0.00795719	0.652971	rs1920515	4	129640056	C	T	0.078	-0.0228037	0.00405535
ILMN_1736700	226	ALDOA	16	30076993	30081741	imputed											rs7203240	16	29268585	C	T	0.494	0.0657761	0.00470768
